# Supplementary material for: Integrated Systems Biology Pipeline to Compare Co-Expression Networks in Plants and Elucidate Differential Regulators
Source: Plants (Basel). 2023 Oct 19;12(20):3618. doi: 10.3390/plants12203618 (PMC10610404; doi:10.3390/plants12203618)
Supplement: Supplementary file 1 [file plants-12-03618-s001.zip › S_Table S1.XLSX]

## Sheet: Supplementary Table 1
Supplementary Table S1: Co-expression-GRN network Uncut and 3hr post decapitation overlap
SI	Sheet	Description
1	Co-expressed-GRN-Table	Co-expression-GRN overlap network table.
2	Uncut Metascape Function enrichment	Metascape Functional Enrichment Analysis of gene exclusive to Uncut Co-expression-GRN network.
3	3hpc Metascape Functional enrichment	Metascape Functional Enrichment Analysis of gene exclusive to pH Co-expression-GRN network.
4	Uncut and 3hpc Metascape Functional enrichment	Functional enrichment Analysis of genes common to Uncut and 3hpc co-expression-GRN networks using Metascape.

## Sheet: Co-expressed-GRN-Table
AGI	color	Net	TF
AT1G18330	#FFD602	Uncut and 3hpc	TF
AT4G14430	#1E6B52	Uncut	NON_TF
AT2G39380	#1E6B52	Uncut	NON_TF
AT5G46760	#1E6B52	Uncut	TF
AT1G05830	#1E6B52	Uncut	TF
AT5G25180	#1E6B52	Uncut	NON_TF
AT2G16910	#1E6B52	Uncut	TF
AT5G64950	#1E6B52	Uncut	TF
AT4G00305	#1E6B52	Uncut	NON_TF
AT1G31170	#1E6B52	Uncut	NON_TF
AT4G13830	#1E6B52	Uncut	NON_TF
AT5G06680	#1E6B52	Uncut	NON_TF
AT1G09000	#1E6B52	Uncut	NON_TF
AT5G49990	#1E6B52	Uncut	NON_TF
AT2G40720	#1E6B52	Uncut	NON_TF
AT5G27280	#1E6B52	Uncut	NON_TF
AT3G60620	#1E6B52	Uncut	NON_TF
AT4G37685	#1E6B52	Uncut	NON_TF
AT2G10930	#1E6B52	Uncut	NON_TF
AT3G27980	#1E6B52	Uncut	NON_TF
AT5G50011	#1E6B52	Uncut	NON_TF
AT4G34588	#1E6B52	Uncut	NON_TF
AT5G62090	#1E6B52	Uncut	NON_TF
AT2G37140	#1E6B52	Uncut	NON_TF
AT5G25120	#1E6B52	Uncut	NON_TF
AT2G46400	#1E6B52	Uncut	TF
AT4G08480	#1E6B52	Uncut	NON_TF
AT4G10170	#1E6B52	Uncut	NON_TF
AT5G37830	#1E6B52	Uncut	NON_TF
AT1G20640	#1E6B52	Uncut	TF
AT3G54625	#1E6B52	Uncut	NON_TF
AT3G23160	#1E6B52	Uncut	NON_TF
AT5G37790	#1E6B52	Uncut	NON_TF
AT4G07825	#1E6B52	Uncut	NON_TF
AT1G49720	#1E6B52	Uncut	TF
AT5G11460	#1E6B52	Uncut	NON_TF
AT1G66200	#1E6B52	Uncut	NON_TF
AT1G75050	#1E6B52	Uncut	NON_TF
AT3G61810	#1E6B52	Uncut	NON_TF
AT4G00060	#1E6B52	Uncut	NON_TF
AT1G78690	#1E6B52	Uncut	NON_TF
AT1G17200	#1E6B52	Uncut	NON_TF
AT1G15540	#1E6B52	Uncut	NON_TF
AT1G60890	#1E6B52	Uncut	NON_TF
AT3G47940	#1E6B52	Uncut	NON_TF
AT3G18050	#1E6B52	Uncut	NON_TF
AT5G26622	#1E6B52	Uncut	NON_TF
AT4G20310	#A69363	3hpc	NON_TF
AT1G19490	#A69363	3hpc	TF
AT4G01280	#1E6B52	Uncut	TF
AT3G55370	#1E6B52	Uncut	TF
AT5G35400	#1E6B52	Uncut	NON_TF
AT2G43260	#1E6B52	Uncut	NON_TF
AT1G11320	#1E6B52	Uncut	NON_TF
AT1G06140	#1E6B52	Uncut	NON_TF
AT3G47650	#1E6B52	Uncut	NON_TF
AT2G42450	#1E6B52	Uncut	NON_TF
AT1G20030	#1E6B52	Uncut	NON_TF
AT4G08940	#FFD602	Uncut and 3hpc	NON_TF
AT1G54570	#1E6B52	Uncut	NON_TF
AT4G12480	#1E6B52	Uncut	NON_TF
AT3G46630	#1E6B52	Uncut	NON_TF
AT3G49500	#1E6B52	Uncut	NON_TF
AT4G29190	#1E6B52	Uncut	TF
AT5G19490	#1E6B52	Uncut	TF
AT1G77030	#1E6B52	Uncut	NON_TF
AT4G02390	#1E6B52	Uncut	NON_TF
AT4G30870	#1E6B52	Uncut	NON_TF
AT2G40700	#1E6B52	Uncut	NON_TF
AT5G15802	#1E6B52	Uncut	NON_TF
AT4G18490	#1E6B52	Uncut	NON_TF
AT1G65130	#1E6B52	Uncut	NON_TF
AT1G80720	#1E6B52	Uncut	NON_TF
AT2G42200	#1E6B52	Uncut	TF
AT2G12550	#1E6B52	Uncut	NON_TF
AT3G48440	#1E6B52	Uncut	TF
AT3G29090	#1E6B52	Uncut	NON_TF
AT1G43620	#1E6B52	Uncut	NON_TF
AT5G52230	#1E6B52	Uncut	NON_TF
AT5G66550	#1E6B52	Uncut	NON_TF
AT5G40160	#1E6B52	Uncut	NON_TF
AT1G04130	#1E6B52	Uncut	NON_TF
AT4G28706	#1E6B52	Uncut	NON_TF
AT5G01620	#1E6B52	Uncut	NON_TF
AT5G38300	#1E6B52	Uncut	NON_TF
AT1G66510	#1E6B52	Uncut	NON_TF
AT1G72600	#1E6B52	Uncut	NON_TF
AT1G20020	#1E6B52	Uncut	NON_TF
AT5G01660	#1E6B52	Uncut	NON_TF
AT1G20650	#1E6B52	Uncut	NON_TF
AT1G74280	#1E6B52	Uncut	NON_TF
AT3G50040	#1E6B52	Uncut	NON_TF
AT3G62455	#1E6B52	Uncut	NON_TF
AT2G36990	#1E6B52	Uncut	TF
AT5G66770	#1E6B52	Uncut	TF
AT1G16640	#1E6B52	Uncut	TF
AT2G05760	#1E6B52	Uncut	NON_TF
AT4G11175	#1E6B52	Uncut	NON_TF
AT5G37530	#1E6B52	Uncut	NON_TF
AT2G02150	#1E6B52	Uncut	NON_TF
AT3G04960	#1E6B52	Uncut	NON_TF
AT4G17980	#1E6B52	Uncut	TF
AT3G44860	#1E6B52	Uncut	NON_TF
AT5G66070	#1E6B52	Uncut	NON_TF
AT3G61880	#1E6B52	Uncut	NON_TF
AT3G26830	#1E6B52	Uncut	NON_TF
AT1G80840	#1E6B52	Uncut	TF
AT1G29400	#1E6B52	Uncut	NON_TF
AT2G20880	#1E6B52	Uncut	TF
AT2G36830	#1E6B52	Uncut	NON_TF
AT2G46940	#1E6B52	Uncut	NON_TF
AT1G28335	#1E6B52	Uncut	NON_TF
AT2G30400	#1E6B52	Uncut	TF
AT1G64380	#1E6B52	Uncut	TF
AT5G52050	#1E6B52	Uncut	NON_TF
AT1G66230	#1E6B52	Uncut	TF
AT5G16010	#1E6B52	Uncut	NON_TF
AT3G49690	#1E6B52	Uncut	TF
AT1G58340	#FFD602	Uncut and 3hpc	NON_TF
AT3G51660	#1E6B52	Uncut	NON_TF
AT4G35480	#1E6B52	Uncut	NON_TF
AT2G31230	#1E6B52	Uncut	TF
AT4G02320	#1E6B52	Uncut	NON_TF
AT5G39650	#1E6B52	Uncut	NON_TF
AT5G59732	#1E6B52	Uncut	NON_TF
AT4G11670	#1E6B52	Uncut	NON_TF
AT3G28760	#1E6B52	Uncut	NON_TF
AT3G21295	#1E6B52	Uncut	NON_TF
AT2G17520	#1E6B52	Uncut	NON_TF
AT4G13660	#1E6B52	Uncut	NON_TF
AT5G64230	#1E6B52	Uncut	NON_TF
AT4G18770	#1E6B52	Uncut	TF
AT4G26140	#1E6B52	Uncut	NON_TF
AT5G43860	#1E6B52	Uncut	NON_TF
AT1G02650	#1E6B52	Uncut	NON_TF
AT5G49665	#1E6B52	Uncut	NON_TF
AT1G73510	#1E6B52	Uncut	NON_TF
AT5G56870	#1E6B52	Uncut	NON_TF
AT2G16140	#1E6B52	Uncut	NON_TF
AT3G08500	#1E6B52	Uncut	TF
AT4G30400	#1E6B52	Uncut	NON_TF
AT1G62990	#1E6B52	Uncut	TF
AT2G42960	#1E6B52	Uncut	NON_TF
AT3G23200	#1E6B52	Uncut	NON_TF
AT3G15250	#1E6B52	Uncut	NON_TF
AT4G09460	#1E6B52	Uncut	TF
AT1G23040	#1E6B52	Uncut	NON_TF
AT3G06450	#1E6B52	Uncut	NON_TF
AT1G51260	#1E6B52	Uncut	NON_TF
AT2G46760	#1E6B52	Uncut	NON_TF
AT3G61380	#1E6B52	Uncut	NON_TF
AT2G30720	#1E6B52	Uncut	NON_TF
AT2G28315	#1E6B52	Uncut	NON_TF
AT4G38225	#1E6B52	Uncut	NON_TF
AT1G22650	#1E6B52	Uncut	NON_TF
AT5G01830	#1E6B52	Uncut	NON_TF
AT1G29760	#1E6B52	Uncut	NON_TF
AT1G22470	#1E6B52	Uncut	NON_TF
AT1G35515	#1E6B52	Uncut	TF
AT2G28200	#1E6B52	Uncut	TF
AT5G17800	#1E6B52	Uncut	TF
AT1G20140	#1E6B52	Uncut	NON_TF
AT5G49010	#1E6B52	Uncut	NON_TF
AT2G23755	#1E6B52	Uncut	NON_TF
AT5G56590	#1E6B52	Uncut	NON_TF
AT5G03830	#1E6B52	Uncut	NON_TF
AT3G56900	#1E6B52	Uncut	NON_TF
AT1G55040	#1E6B52	Uncut	NON_TF
AT3G01311	#1E6B52	Uncut	NON_TF
AT1G12490	#1E6B52	Uncut	NON_TF
AT5G10340	#1E6B52	Uncut	NON_TF
AT5G11780	#1E6B52	Uncut	NON_TF
AT1G25360	#1E6B52	Uncut	NON_TF
AT1G12630	#1E6B52	Uncut	TF
AT1G27170	#1E6B52	Uncut	NON_TF
AT4G20740	#1E6B52	Uncut	NON_TF
AT1G14390	#1E6B52	Uncut	NON_TF
AT3G53840	#1E6B52	Uncut	NON_TF
AT1G07240	#1E6B52	Uncut	NON_TF
AT3G52870	#1E6B52	Uncut	NON_TF
AT4G34120	#1E6B52	Uncut	NON_TF
AT2G14520	#1E6B52	Uncut	NON_TF
AT1G23800	#1E6B52	Uncut	NON_TF
AT1G17680	#1E6B52	Uncut	NON_TF
AT5G54960	#1E6B52	Uncut	NON_TF
AT3G13490	#1E6B52	Uncut	NON_TF
AT5G23360	#1E6B52	Uncut	NON_TF
AT5G42380	#1E6B52	Uncut	NON_TF
AT1G05030	#1E6B52	Uncut	NON_TF
AT4G27780	#1E6B52	Uncut	NON_TF
AT5G63930	#1E6B52	Uncut	NON_TF
AT2G46950	#1E6B52	Uncut	NON_TF
AT3G16400	#1E6B52	Uncut	NON_TF
AT4G26700	#1E6B52	Uncut	NON_TF
AT4G26060	#1E6B52	Uncut	NON_TF
AT1G70140	#1E6B52	Uncut	NON_TF
AT3G08810	#1E6B52	Uncut	NON_TF
AT2G40400	#1E6B52	Uncut	NON_TF
AT1G65620	#1E6B52	Uncut	TF
AT5G50200	#1E6B52	Uncut	NON_TF
AT1G33610	#1E6B52	Uncut	NON_TF
AT1G56660	#1E6B52	Uncut	NON_TF
AT1G70520	#1E6B52	Uncut	NON_TF
AT5G53110	#1E6B52	Uncut	NON_TF
AT5G45480	#1E6B52	Uncut	NON_TF
AT1G38131	#1E6B52	Uncut	NON_TF
AT5G12170	#1E6B52	Uncut	NON_TF
AT5G42310	#1E6B52	Uncut	NON_TF
AT3G18280	#1E6B52	Uncut	NON_TF
AT1G21010	#1E6B52	Uncut	NON_TF
AT1G79560	#1E6B52	Uncut	NON_TF
AT1G34180	#1E6B52	Uncut	TF
AT1G77620	#1E6B52	Uncut	NON_TF
AT4G34760	#1E6B52	Uncut	NON_TF
AT2G39480	#1E6B52	Uncut	NON_TF
AT4G21190	#1E6B52	Uncut	NON_TF
AT5G15670	#1E6B52	Uncut	NON_TF
AT1G21810	#1E6B52	Uncut	NON_TF
AT3G15440	#1E6B52	Uncut	NON_TF
AT4G19230	#1E6B52	Uncut	NON_TF
AT1G75820	#FFD602	Uncut and 3hpc	NON_TF
AT2G19060	#1E6B52	Uncut	NON_TF
AT2G36780	#1E6B52	Uncut	NON_TF
AT1G66960	#1E6B52	Uncut	NON_TF
AT4G19050	#1E6B52	Uncut	NON_TF
AT1G67520	#1E6B52	Uncut	NON_TF
AT4G39380	#1E6B52	Uncut	NON_TF
AT5G62720	#1E6B52	Uncut	NON_TF
AT3G47580	#1E6B52	Uncut	NON_TF
AT1G79640	#1E6B52	Uncut	NON_TF
AT1G75720	#1E6B52	Uncut	NON_TF
AT5G11130	#1E6B52	Uncut	NON_TF
AT1G23440	#1E6B52	Uncut	NON_TF
AT5G06330	#1E6B52	Uncut	NON_TF
AT4G02190	#1E6B52	Uncut	NON_TF
AT2G44995	#1E6B52	Uncut	NON_TF
AT4G13885	#1E6B52	Uncut	NON_TF
AT3G47080	#1E6B52	Uncut	NON_TF
AT4G24015	#1E6B52	Uncut	NON_TF
AT5G27870	#1E6B52	Uncut	NON_TF
AT4G21420	#1E6B52	Uncut	NON_TF
AT4G31660	#1E6B52	Uncut	TF
AT4G01760	#1E6B52	Uncut	NON_TF
AT3G05770	#1E6B52	Uncut	NON_TF
AT2G19220	#1E6B52	Uncut	NON_TF
AT1G60095	#1E6B52	Uncut	NON_TF
AT3G01760	#1E6B52	Uncut	NON_TF
AT4G29210	#1E6B52	Uncut	NON_TF
AT2G23140	#1E6B52	Uncut	NON_TF
AT3G57700	#1E6B52	Uncut	NON_TF
AT1G14780	#1E6B52	Uncut	NON_TF
AT2G20110	#1E6B52	Uncut	TF
AT1G23790	#1E6B52	Uncut	NON_TF
AT3G61118	#1E6B52	Uncut	NON_TF
AT1G60080	#1E6B52	Uncut	NON_TF
AT4G37920	#1E6B52	Uncut	NON_TF
AT1G34770	#1E6B52	Uncut	NON_TF
AT1G62750	#1E6B52	Uncut	NON_TF
AT3G07130	#1E6B52	Uncut	NON_TF
AT1G56260	#1E6B52	Uncut	NON_TF
AT1G67400	#1E6B52	Uncut	NON_TF
AT4G23540	#1E6B52	Uncut	NON_TF
AT5G64930	#1E6B52	Uncut	NON_TF
AT3G48450	#1E6B52	Uncut	NON_TF
AT2G14860	#1E6B52	Uncut	NON_TF
AT1G16280	#1E6B52	Uncut	NON_TF
AT2G13800	#1E6B52	Uncut	NON_TF
AT3G47640	#1E6B52	Uncut	TF
AT5G40460	#1E6B52	Uncut	NON_TF
AT1G36070	#1E6B52	Uncut	NON_TF
AT1G54050	#1E6B52	Uncut	NON_TF
AT1G56570	#1E6B52	Uncut	NON_TF
AT2G04842	#1E6B52	Uncut	NON_TF
AT2G22900	#1E6B52	Uncut	NON_TF
AT2G38780	#1E6B52	Uncut	NON_TF
AT4G28450	#1E6B52	Uncut	NON_TF
AT1G32200	#1E6B52	Uncut	NON_TF
AT1G12610	#1E6B52	Uncut	TF
AT5G16370	#1E6B52	Uncut	NON_TF
AT5G66100	#1E6B52	Uncut	NON_TF
AT4G34590	#1E6B52	Uncut	TF
AT3G13040	#1E6B52	Uncut	TF
AT3G46450	#1E6B52	Uncut	NON_TF
AT2G32170	#1E6B52	Uncut	NON_TF
AT1G74240	#1E6B52	Uncut	NON_TF
AT1G69810	#1E6B52	Uncut	TF
AT1G72830	#1E6B52	Uncut	TF
AT4G35780	#1E6B52	Uncut	NON_TF
AT1G19860	#1E6B52	Uncut	TF
AT2G35100	#1E6B52	Uncut	NON_TF
AT2G36307	#1E6B52	Uncut	NON_TF
AT3G48360	#1E6B52	Uncut	TF
AT1G71710	#1E6B52	Uncut	NON_TF
AT5G61690	#1E6B52	Uncut	NON_TF
AT4G03420	#1E6B52	Uncut	NON_TF
AT1G80850	#1E6B52	Uncut	NON_TF
AT1G70900	#1E6B52	Uncut	NON_TF
AT1G74200	#1E6B52	Uncut	NON_TF
AT2G46830	#1E6B52	Uncut	TF
AT4G14280	#1E6B52	Uncut	NON_TF
AT2G31820	#1E6B52	Uncut	NON_TF
AT1G67900	#1E6B52	Uncut	NON_TF
AT3G06210	#1E6B52	Uncut	NON_TF
AT1G20830	#1E6B52	Uncut	NON_TF
AT5G42270	#1E6B52	Uncut	NON_TF
AT5G52660	#1E6B52	Uncut	TF
AT5G47520	#1E6B52	Uncut	NON_TF
AT5G04550	#1E6B52	Uncut	NON_TF
AT4G25520	#1E6B52	Uncut	NON_TF
AT3G10113	#FFD602	Uncut and 3hpc	TF
AT1G77885	#1E6B52	Uncut	NON_TF
AT2G46790	#1E6B52	Uncut	TF
AT3G48730	#1E6B52	Uncut	NON_TF
AT5G05700	#1E6B52	Uncut	NON_TF
AT2G14050	#1E6B52	Uncut	NON_TF
AT3G25590	#1E6B52	Uncut	NON_TF
AT2G30920	#1E6B52	Uncut	NON_TF
AT2G03240	#1E6B52	Uncut	NON_TF
AT1G08530	#1E6B52	Uncut	NON_TF
AT1G78730	#1E6B52	Uncut	NON_TF
AT1G09950	#1E6B52	Uncut	NON_TF
AT1G18420	#1E6B52	Uncut	NON_TF
AT4G32990	#1E6B52	Uncut	NON_TF
AT4G04780	#1E6B52	Uncut	NON_TF
AT5G39240	#1E6B52	Uncut	NON_TF
AT4G40060	#1E6B52	Uncut	TF
AT1G02270	#1E6B52	Uncut	NON_TF
AT1G58160	#1E6B52	Uncut	NON_TF
AT1G20470	#1E6B52	Uncut	NON_TF
AT5G25130	#1E6B52	Uncut	NON_TF
AT1G29720	#1E6B52	Uncut	NON_TF
AT5G49430	#1E6B52	Uncut	NON_TF
AT5G12180	#1E6B52	Uncut	NON_TF
AT4G18520	#1E6B52	Uncut	NON_TF
AT1G33102	#1E6B52	Uncut	NON_TF
AT5G67570	#1E6B52	Uncut	NON_TF
AT1G02280	#1E6B52	Uncut	NON_TF
AT4G17616	#1E6B52	Uncut	NON_TF
AT2G06255	#1E6B52	Uncut	NON_TF
AT5G56180	#1E6B52	Uncut	NON_TF
AT1G18490	#1E6B52	Uncut	NON_TF
AT4G24200	#1E6B52	Uncut	NON_TF
AT1G74750	#1E6B52	Uncut	NON_TF
AT5G25460	#1E6B52	Uncut	NON_TF
AT4G09900	#1E6B52	Uncut	NON_TF
AT3G06810	#1E6B52	Uncut	NON_TF
AT3G48310	#1E6B52	Uncut	NON_TF
AT1G60990	#A69363	3hpc	NON_TF
AT2G37590	#1E6B52	Uncut	TF
AT5G40270	#1E6B52	Uncut	NON_TF
AT5G02460	#1E6B52	Uncut	TF
AT1G27620	#1E6B52	Uncut	NON_TF
AT1G15510	#1E6B52	Uncut	NON_TF
AT2G03110	#1E6B52	Uncut	NON_TF
AT3G61740	#1E6B52	Uncut	TF
AT1G59640	#1E6B52	Uncut	TF
AT2G17670	#1E6B52	Uncut	NON_TF
AT5G42370	#1E6B52	Uncut	NON_TF
AT1G37150	#1E6B52	Uncut	NON_TF
AT5G48970	#1E6B52	Uncut	NON_TF
AT1G16330	#1E6B52	Uncut	NON_TF
AT5G63920	#1E6B52	Uncut	NON_TF
AT2G04865	#1E6B52	Uncut	NON_TF
AT1G02370	#1E6B52	Uncut	NON_TF
AT3G28455	#1E6B52	Uncut	NON_TF
AT1G23100	#1E6B52	Uncut	NON_TF
AT3G55400	#1E6B52	Uncut	NON_TF
AT1G53570	#1E6B52	Uncut	NON_TF
AT1G28310	#1E6B52	Uncut	TF
AT2G28130	#1E6B52	Uncut	NON_TF
AT5G49880	#1E6B52	Uncut	NON_TF
AT4G22860	#1E6B52	Uncut	NON_TF
AT1G77580	#1E6B52	Uncut	NON_TF
AT5G36250	#1E6B52	Uncut	NON_TF
AT1G45180	#1E6B52	Uncut	NON_TF
AT2G34260	#1E6B52	Uncut	NON_TF
AT4G33620	#1E6B52	Uncut	NON_TF
AT5G45140	#1E6B52	Uncut	NON_TF
AT1G66740	#1E6B52	Uncut	NON_TF
AT3G04020	#1E6B52	Uncut	NON_TF
AT4G37110	#1E6B52	Uncut	NON_TF
AT3G17350	#1E6B52	Uncut	NON_TF
AT4G12390	#1E6B52	Uncut	NON_TF
AT1G05470	#1E6B52	Uncut	NON_TF
AT3G49380	#1E6B52	Uncut	NON_TF
AT5G12970	#1E6B52	Uncut	NON_TF
AT5G27550	#1E6B52	Uncut	NON_TF
AT5G04885	#1E6B52	Uncut	NON_TF
AT3G16260	#1E6B52	Uncut	NON_TF
AT1G15080	#1E6B52	Uncut	NON_TF
AT3G57660	#1E6B52	Uncut	NON_TF
AT1G49630	#1E6B52	Uncut	NON_TF
AT5G40290	#1E6B52	Uncut	NON_TF
AT3G02000	#1E6B52	Uncut	NON_TF
AT2G24960	#1E6B52	Uncut	NON_TF
AT2G32710	#1E6B52	Uncut	NON_TF
AT1G65910	#1E6B52	Uncut	TF
AT3G56100	#1E6B52	Uncut	NON_TF
AT4G28430	#1E6B52	Uncut	NON_TF
AT5G02940	#1E6B52	Uncut	NON_TF
AT5G59240	#1E6B52	Uncut	NON_TF
AT4G04490	#1E6B52	Uncut	NON_TF
AT2G17705	#1E6B52	Uncut	NON_TF
AT4G10070	#1E6B52	Uncut	NON_TF
AT3G12550	#1E6B52	Uncut	NON_TF
AT2G18780	#1E6B52	Uncut	NON_TF
AT1G54350	#1E6B52	Uncut	NON_TF
AT5G04810	#1E6B52	Uncut	NON_TF
AT3G44960	#1E6B52	Uncut	NON_TF
AT3G02120	#1E6B52	Uncut	NON_TF
AT5G09410	#1E6B52	Uncut	TF
AT3G59770	#1E6B52	Uncut	NON_TF
AT4G38910	#1E6B52	Uncut	TF
AT5G55580	#1E6B52	Uncut	TF
AT1G72610	#1E6B52	Uncut	NON_TF
AT3G44890	#1E6B52	Uncut	NON_TF
AT2G38010	#1E6B52	Uncut	NON_TF
AT1G75230	#1E6B52	Uncut	NON_TF
AT1G71490	#1E6B52	Uncut	NON_TF
AT5G13760	#1E6B52	Uncut	NON_TF
AT1G55020	#1E6B52	Uncut	NON_TF
AT1G10270	#1E6B52	Uncut	NON_TF
AT2G23950	#1E6B52	Uncut	NON_TF
AT4G04670	#1E6B52	Uncut	NON_TF
AT1G24095	#1E6B52	Uncut	NON_TF
AT5G11720	#1E6B52	Uncut	NON_TF
AT3G17170	#1E6B52	Uncut	NON_TF
AT4G19610	#1E6B52	Uncut	NON_TF
AT5G35910	#1E6B52	Uncut	NON_TF
AT1G69210	#1E6B52	Uncut	NON_TF
AT2G34460	#1E6B52	Uncut	NON_TF
AT4G21220	#1E6B52	Uncut	NON_TF
AT3G07750	#1E6B52	Uncut	NON_TF
AT3G57360	#1E6B52	Uncut	NON_TF
AT5G40405	#1E6B52	Uncut	NON_TF
AT1G80870	#1E6B52	Uncut	NON_TF
AT3G51790	#1E6B52	Uncut	NON_TF
AT1G66080	#1E6B52	Uncut	NON_TF
AT1G66250	#1E6B52	Uncut	NON_TF
AT2G30350	#1E6B52	Uncut	NON_TF
AT5G62320	#FFD602	Uncut and 3hpc	TF
AT1G67560	#1E6B52	Uncut	NON_TF
AT4G27900	#1E6B52	Uncut	TF
AT4G26990	#1E6B52	Uncut	NON_TF
AT3G05165	#1E6B52	Uncut	NON_TF
AT1G08050	#1E6B52	Uncut	NON_TF
AT5G20860	#1E6B52	Uncut	NON_TF
AT1G68825	#1E6B52	Uncut	NON_TF
AT5G10410	#1E6B52	Uncut	NON_TF
AT4G21480	#1E6B52	Uncut	NON_TF
AT4G27710	#A69363	3hpc	NON_TF
AT1G67740	#A69363	3hpc	NON_TF
AT3G11020	#1E6B52	Uncut	TF
AT4G02370	#1E6B52	Uncut	NON_TF
AT5G61290	#1E6B52	Uncut	NON_TF
AT5G41750	#1E6B52	Uncut	NON_TF
AT1G51940	#1E6B52	Uncut	NON_TF
AT5G49360	#1E6B52	Uncut	NON_TF
AT5G53500	#1E6B52	Uncut	NON_TF
AT5G57210	#1E6B52	Uncut	NON_TF
AT4G32260	#1E6B52	Uncut	NON_TF
AT5G57900	#1E6B52	Uncut	NON_TF
AT1G78270	#1E6B52	Uncut	NON_TF
AT3G48320	#1E6B52	Uncut	NON_TF
AT5G66730	#1E6B52	Uncut	TF
AT1G47056	#1E6B52	Uncut	NON_TF
AT1G47960	#1E6B52	Uncut	NON_TF
AT5G52190	#1E6B52	Uncut	NON_TF
AT4G14713	#1E6B52	Uncut	TF
AT3G11080	#1E6B52	Uncut	NON_TF
AT1G72010	#1E6B52	Uncut	TF
AT1G30810	#1E6B52	Uncut	TF
AT1G36992	#1E6B52	Uncut	NON_TF
AT3G46670	#1E6B52	Uncut	NON_TF
AT5G48485	#1E6B52	Uncut	NON_TF
AT5G04820	#1E6B52	Uncut	TF
AT2G32970	#1E6B52	Uncut	NON_TF
AT3G50640	#1E6B52	Uncut	NON_TF
AT1G78910	#1E6B52	Uncut	NON_TF
AT2G06200	#1E6B52	Uncut	TF
AT5G49555	#1E6B52	Uncut	NON_TF
AT1G10120	#1E6B52	Uncut	TF
AT2G20750	#1E6B52	Uncut	NON_TF
AT5G07030	#1E6B52	Uncut	NON_TF
AT4G01680	#1E6B52	Uncut	TF
AT5G56250	#1E6B52	Uncut	NON_TF
AT4G36880	#1E6B52	Uncut	NON_TF
AT2G38240	#1E6B52	Uncut	NON_TF
AT1G76070	#1E6B52	Uncut	NON_TF
AT1G21680	#1E6B52	Uncut	NON_TF
AT3G04010	#1E6B52	Uncut	NON_TF
AT3G50930	#1E6B52	Uncut	NON_TF
AT3G16340	#1E6B52	Uncut	NON_TF
AT1G01010	#1E6B52	Uncut	TF
AT3G44870	#1E6B52	Uncut	NON_TF
AT1G37130	#1E6B52	Uncut	NON_TF
AT5G40690	#1E6B52	Uncut	NON_TF
AT3G49780	#1E6B52	Uncut	NON_TF
AT5G02230	#1E6B52	Uncut	NON_TF
AT5G08520	#1E6B52	Uncut	TF
AT4G27010	#1E6B52	Uncut	NON_TF
AT3G63050	#1E6B52	Uncut	NON_TF
AT1G48210	#1E6B52	Uncut	NON_TF
AT2G14130	#1E6B52	Uncut	NON_TF
AT2G03821	#1E6B52	Uncut	NON_TF
AT4G08160	#1E6B52	Uncut	NON_TF
AT1G16540	#1E6B52	Uncut	NON_TF
AT4G14550	#1E6B52	Uncut	TF
AT1G67080	#1E6B52	Uncut	NON_TF
AT5G49760	#1E6B52	Uncut	NON_TF
AT2G18300	#1E6B52	Uncut	TF
AT1G43630	#1E6B52	Uncut	NON_TF
AT3G28740	#1E6B52	Uncut	NON_TF
AT1G08890	#1E6B52	Uncut	NON_TF
AT3G14670	#1E6B52	Uncut	NON_TF
AT2G33860	#1E6B52	Uncut	TF
AT4G32040	#1E6B52	Uncut	TF
AT3G11440	#1E6B52	Uncut	TF
AT1G64400	#1E6B52	Uncut	NON_TF
AT3G05210	#1E6B52	Uncut	NON_TF
AT2G22040	#1E6B52	Uncut	NON_TF
AT3G21270	#1E6B52	Uncut	TF
AT1G15870	#1E6B52	Uncut	NON_TF
AT1G24320	#1E6B52	Uncut	NON_TF
AT5G24020	#1E6B52	Uncut	NON_TF
AT5G62220	#1E6B52	Uncut	NON_TF
AT5G03910	#1E6B52	Uncut	NON_TF
AT5G41120	#1E6B52	Uncut	NON_TF
AT3G18140	#1E6B52	Uncut	NON_TF
AT1G69800	#1E6B52	Uncut	NON_TF
AT1G49360	#1E6B52	Uncut	NON_TF
AT1G28090	#1E6B52	Uncut	NON_TF
AT1G59790	#1E6B52	Uncut	NON_TF
AT2G46510	#1E6B52	Uncut	TF
AT4G13630	#1E6B52	Uncut	NON_TF
AT1G36060	#1E6B52	Uncut	TF
AT1G59780	#1E6B52	Uncut	NON_TF
AT3G42180	#1E6B52	Uncut	NON_TF
AT5G01990	#1E6B52	Uncut	NON_TF
AT5G01530	#1E6B52	Uncut	NON_TF
AT5G52390	#1E6B52	Uncut	NON_TF
AT1G07870	#1E6B52	Uncut	NON_TF
AT2G28890	#1E6B52	Uncut	NON_TF
AT5G41290	#1E6B52	Uncut	NON_TF
AT4G16515	#1E6B52	Uncut	NON_TF
AT4G29230	#1E6B52	Uncut	TF
AT5G12300	#1E6B52	Uncut	NON_TF
AT2G05320	#1E6B52	Uncut	NON_TF
AT5G62100	#1E6B52	Uncut	NON_TF
AT5G43270	#1E6B52	Uncut	TF
AT1G04120	#1E6B52	Uncut	NON_TF
AT1G47750	#1E6B52	Uncut	NON_TF
AT2G25190	#1E6B52	Uncut	NON_TF
AT2G46270	#1E6B52	Uncut	TF
AT1G18890	#1E6B52	Uncut	NON_TF
AT4G28620	#1E6B52	Uncut	NON_TF
AT3G55890	#1E6B52	Uncut	NON_TF
AT3G03550	#1E6B52	Uncut	NON_TF
AT5G48640	#1E6B52	Uncut	NON_TF
AT3G11700	#1E6B52	Uncut	NON_TF
AT5G57340	#1E6B52	Uncut	NON_TF
AT4G28630	#1E6B52	Uncut	NON_TF
AT5G02840	#1E6B52	Uncut	TF
AT3G20640	#1E6B52	Uncut	NON_TF
AT1G67510	#1E6B52	Uncut	NON_TF
AT3G27310	#1E6B52	Uncut	NON_TF
AT1G72740	#1E6B52	Uncut	TF
AT3G29639	#1E6B52	Uncut	NON_TF
AT4G34340	#1E6B52	Uncut	NON_TF
AT1G66460	#1E6B52	Uncut	NON_TF
AT1G29630	#1E6B52	Uncut	NON_TF
AT1G27930	#1E6B52	Uncut	NON_TF
AT5G54690	#1E6B52	Uncut	NON_TF
AT5G57880	#1E6B52	Uncut	NON_TF
AT2G41010	#1E6B52	Uncut	NON_TF
AT1G11020	#1E6B52	Uncut	NON_TF
AT5G20220	#1E6B52	Uncut	NON_TF
AT4G08920	#1E6B52	Uncut	NON_TF
AT5G14220	#1E6B52	Uncut	NON_TF
AT5G04640	#1E6B52	Uncut	TF
AT4G14720	#1E6B52	Uncut	TF
AT1G09740	#1E6B52	Uncut	NON_TF
AT1G29410	#1E6B52	Uncut	NON_TF
AT1G12020	#1E6B52	Uncut	NON_TF
AT5G46370	#1E6B52	Uncut	NON_TF
AT1G07300	#1E6B52	Uncut	NON_TF
AT4G21010	#1E6B52	Uncut	NON_TF
AT2G37920	#1E6B52	Uncut	NON_TF
AT5G02320	#1E6B52	Uncut	TF
AT1G52670	#1E6B52	Uncut	NON_TF
AT1G49350	#1E6B52	Uncut	NON_TF
AT1G68670	#1E6B52	Uncut	TF
AT4G19060	#1E6B52	Uncut	NON_TF
AT2G19710	#1E6B52	Uncut	NON_TF
AT5G23700	#1E6B52	Uncut	NON_TF
AT1G22910	#1E6B52	Uncut	NON_TF
AT5G57035	#1E6B52	Uncut	NON_TF
AT2G03070	#1E6B52	Uncut	NON_TF
AT5G57070	#1E6B52	Uncut	NON_TF
AT2G40620	#1E6B52	Uncut	TF
AT4G36160	#1E6B52	Uncut	TF
AT4G28040	#1E6B52	Uncut	NON_TF
AT5G08130	#1E6B52	Uncut	TF
AT5G35670	#1E6B52	Uncut	NON_TF
AT1G80240	#1E6B52	Uncut	NON_TF
AT3G53010	#1E6B52	Uncut	NON_TF
AT5G66300	#1E6B52	Uncut	TF
AT4G20410	#1E6B52	Uncut	NON_TF
AT4G28050	#1E6B52	Uncut	NON_TF
AT1G21910	#1E6B52	Uncut	TF
AT2G46710	#1E6B52	Uncut	NON_TF
AT3G12250	#1E6B52	Uncut	TF
AT5G29624	#1E6B52	Uncut	NON_TF
AT3G25165	#1E6B52	Uncut	NON_TF
AT5G65820	#1E6B52	Uncut	NON_TF
AT5G42070	#FFD602	Uncut and 3hpc	NON_TF
AT5G67450	#1E6B52	Uncut	TF
AT2G45150	#1E6B52	Uncut	NON_TF
AT1G68600	#1E6B52	Uncut	NON_TF
AT3G10600	#1E6B52	Uncut	NON_TF
AT1G56090	#1E6B52	Uncut	NON_TF
AT5G04490	#1E6B52	Uncut	NON_TF
AT2G33160	#1E6B52	Uncut	NON_TF
AT2G04500	#1E6B52	Uncut	NON_TF
AT5G24490	#1E6B52	Uncut	NON_TF
AT3G50660	#1E6B52	Uncut	NON_TF
AT3G16330	#1E6B52	Uncut	NON_TF
AT2G24240	#1E6B52	Uncut	NON_TF
AT5G23890	#1E6B52	Uncut	NON_TF
AT1G21722	#1E6B52	Uncut	NON_TF
AT5G06230	#1E6B52	Uncut	NON_TF
AT2G41451	#1E6B52	Uncut	NON_TF
AT2G21490	#1E6B52	Uncut	NON_TF
AT1G16490	#1E6B52	Uncut	TF
AT1G09050	#1E6B52	Uncut	NON_TF
AT1G07200	#1E6B52	Uncut	NON_TF
AT5G17540	#1E6B52	Uncut	NON_TF
AT5G07150	#1E6B52	Uncut	NON_TF
AT4G26640	#1E6B52	Uncut	TF
AT2G23985	#1E6B52	Uncut	NON_TF
AT4G03400	#1E6B52	Uncut	NON_TF
AT3G49000	#1E6B52	Uncut	NON_TF
AT3G18270	#1E6B52	Uncut	NON_TF
AT5G52170	#1E6B52	Uncut	TF
AT3G28890	#1E6B52	Uncut	NON_TF
AT3G03990	#1E6B52	Uncut	NON_TF
AT4G10030	#1E6B52	Uncut	NON_TF
AT1G24330	#1E6B52	Uncut	NON_TF
AT5G13580	#1E6B52	Uncut	NON_TF
AT3G51490	#1E6B52	Uncut	NON_TF
AT4G21890	#1E6B52	Uncut	NON_TF
AT2G47480	#1E6B52	Uncut	NON_TF
AT4G34190	#1E6B52	Uncut	NON_TF
AT5G60280	#1E6B52	Uncut	NON_TF
AT3G50430	#1E6B52	Uncut	NON_TF
AT1G26620	#1E6B52	Uncut	NON_TF
AT5G57610	#1E6B52	Uncut	NON_TF
AT2G21630	#1E6B52	Uncut	NON_TF
AT3G03200	#FFD602	Uncut and 3hpc	TF
AT2G01031	#1E6B52	Uncut	NON_TF
AT2G32150	#1E6B52	Uncut	NON_TF
AT2G31345	#1E6B52	Uncut	NON_TF
AT5G24105	#1E6B52	Uncut	NON_TF
AT4G22530	#1E6B52	Uncut	NON_TF
AT2G26530	#1E6B52	Uncut	NON_TF
AT5G42120	#A69363	3hpc	NON_TF
AT3G28590	#A69363	3hpc	NON_TF
AT2G27690	#A69363	3hpc	NON_TF
AT1G48000	#A69363	3hpc	TF
AT2G33500	#A69363	3hpc	TF
AT4G39830	#A69363	3hpc	NON_TF
AT3G18170	#A69363	3hpc	NON_TF
AT1G02405	#A69363	3hpc	NON_TF
AT5G60850	#1E6B52	Uncut	TF
AT4G30360	#1E6B52	Uncut	NON_TF
AT5G55860	#1E6B52	Uncut	NON_TF
AT3G14840	#1E6B52	Uncut	NON_TF
AT4G16330	#1E6B52	Uncut	NON_TF
AT3G53390	#1E6B52	Uncut	NON_TF
AT1G21450	#1E6B52	Uncut	TF
AT1G47840	#1E6B52	Uncut	NON_TF
AT1G76380	#1E6B52	Uncut	NON_TF
AT2G03730	#1E6B52	Uncut	NON_TF
AT5G59800	#1E6B52	Uncut	NON_TF
AT1G11720	#1E6B52	Uncut	NON_TF
AT1G78160	#1E6B52	Uncut	NON_TF
AT2G44760	#1E6B52	Uncut	NON_TF
AT3G02290	#1E6B52	Uncut	NON_TF
AT1G03060	#1E6B52	Uncut	NON_TF
AT4G23980	#1E6B52	Uncut	TF
AT3G01530	#FFD602	Uncut and 3hpc	TF
AT2G47520	#1E6B52	Uncut	TF
AT3G50350	#1E6B52	Uncut	NON_TF
AT1G67040	#1E6B52	Uncut	NON_TF
AT5G35750	#1E6B52	Uncut	TF
AT5G17580	#1E6B52	Uncut	NON_TF
AT5G22820	#1E6B52	Uncut	NON_TF
AT5G17570	#1E6B52	Uncut	NON_TF
AT5G48790	#1E6B52	Uncut	NON_TF
AT3G44820	#1E6B52	Uncut	NON_TF
AT1G52618	#1E6B52	Uncut	NON_TF
AT5G49060	#1E6B52	Uncut	NON_TF
AT5G47910	#1E6B52	Uncut	NON_TF
AT3G44730	#1E6B52	Uncut	NON_TF
AT1G43700	#1E6B52	Uncut	TF
AT1G23052	#1E6B52	Uncut	NON_TF
AT1G50270	#1E6B52	Uncut	NON_TF
AT1G67850	#1E6B52	Uncut	NON_TF
AT5G44630	#1E6B52	Uncut	NON_TF
AT1G28270	#1E6B52	Uncut	NON_TF
AT3G28390	#A69363	3hpc	NON_TF
AT1G28650	#A69363	3hpc	NON_TF
AT3G21180	#A69363	3hpc	NON_TF
AT1G65481	#A69363	3hpc	NON_TF
AT5G24410	#A69363	3hpc	NON_TF
AT3G52980	#A69363	3hpc	NON_TF
AT1G66470	#A69363	3hpc	TF
AT4G12170	#A69363	3hpc	NON_TF
AT5G20670	#A69363	3hpc	NON_TF
AT4G36900	#FFD602	Uncut and 3hpc	TF
AT3G09580	#1E6B52	Uncut	NON_TF
AT4G02820	#1E6B52	Uncut	NON_TF
AT5G23010	#A69363	3hpc	NON_TF
AT3G04030	#FFD602	Uncut and 3hpc	TF
AT3G19830	#1E6B52	Uncut	NON_TF
AT1G49810	#1E6B52	Uncut	NON_TF
AT1G60750	#1E6B52	Uncut	NON_TF
AT2G35310	#A69363	3hpc	TF
AT3G26310	#A69363	3hpc	NON_TF
AT1G19330	#A69363	3hpc	NON_TF
AT4G18450	#1E6B52	Uncut	TF
AT5G34940	#1E6B52	Uncut	NON_TF
AT5G33290	#1E6B52	Uncut	NON_TF
AT2G47550	#1E6B52	Uncut	NON_TF
AT3G59900	#1E6B52	Uncut	NON_TF
AT1G05010	#1E6B52	Uncut	NON_TF
AT1G26380	#1E6B52	Uncut	NON_TF
AT2G21610	#1E6B52	Uncut	NON_TF
AT5G06860	#1E6B52	Uncut	NON_TF
AT4G16260	#1E6B52	Uncut	NON_TF
AT1G25400	#1E6B52	Uncut	NON_TF
AT5G62170	#1E6B52	Uncut	NON_TF
AT3G55610	#1E6B52	Uncut	NON_TF
AT1G18360	#1E6B52	Uncut	NON_TF
AT5G17300	#1E6B52	Uncut	TF
AT5G11030	#1E6B52	Uncut	NON_TF
AT2G45420	#FFD602	Uncut and 3hpc	TF
AT2G21180	#1E6B52	Uncut	NON_TF
AT5G67310	#1E6B52	Uncut	NON_TF
AT5G13320	#1E6B52	Uncut	NON_TF
AT2G06430	#1E6B52	Uncut	NON_TF
AT5G48730	#1E6B52	Uncut	NON_TF
AT5G64190	#1E6B52	Uncut	NON_TF
AT1G80120	#1E6B52	Uncut	NON_TF
AT5G22355	#1E6B52	Uncut	NON_TF
AT4G11660	#1E6B52	Uncut	TF
AT1G12460	#1E6B52	Uncut	NON_TF
AT5G62370	#1E6B52	Uncut	NON_TF
AT2G21235	#1E6B52	Uncut	TF
AT2G25590	#1E6B52	Uncut	NON_TF
AT5G65200	#1E6B52	Uncut	NON_TF
AT2G44080	#1E6B52	Uncut	NON_TF
AT1G19480	#1E6B52	Uncut	NON_TF
AT3G10510	#1E6B52	Uncut	NON_TF
AT3G43586	#1E6B52	Uncut	NON_TF
AT1G63450	#1E6B52	Uncut	NON_TF
AT4G30825	#1E6B52	Uncut	NON_TF
AT3G14120	#1E6B52	Uncut	NON_TF
AT3G56650	#1E6B52	Uncut	NON_TF
AT4G32770	#1E6B52	Uncut	NON_TF
AT5G49780	#1E6B52	Uncut	NON_TF
AT5G15430	#1E6B52	Uncut	NON_TF
AT1G60110	#1E6B52	Uncut	NON_TF
AT4G26330	#1E6B52	Uncut	NON_TF
AT5G41620	#1E6B52	Uncut	NON_TF
AT3G54040	#A69363	3hpc	NON_TF
AT5G09480	#A69363	3hpc	NON_TF
AT1G02335	#A69363	3hpc	NON_TF
AT5G01190	#A69363	3hpc	NON_TF
AT5G62380	#1E6B52	Uncut	TF
AT5G10690	#1E6B52	Uncut	NON_TF
AT5G38930	#1E6B52	Uncut	NON_TF
AT3G50310	#1E6B52	Uncut	NON_TF
AT3G14220	#1E6B52	Uncut	NON_TF
AT4G34390	#1E6B52	Uncut	NON_TF
AT1G76590	#1E6B52	Uncut	TF
AT5G17660	#1E6B52	Uncut	NON_TF
AT3G04860	#1E6B52	Uncut	NON_TF
AT5G66210	#1E6B52	Uncut	NON_TF
AT3G24520	#1E6B52	Uncut	TF
AT1G61240	#1E6B52	Uncut	NON_TF
AT5G49170	#1E6B52	Uncut	NON_TF
AT3G15530	#1E6B52	Uncut	NON_TF
AT1G42430	#1E6B52	Uncut	NON_TF
AT4G13395	#1E6B52	Uncut	NON_TF
AT3G51910	#1E6B52	Uncut	TF
AT3G49220	#1E6B52	Uncut	NON_TF
AT5G64250	#1E6B52	Uncut	NON_TF
AT4G27652	#1E6B52	Uncut	NON_TF
AT1G17970	#1E6B52	Uncut	NON_TF
AT1G78940	#1E6B52	Uncut	NON_TF
AT2G38470	#1E6B52	Uncut	TF
AT3G01510	#1E6B52	Uncut	NON_TF
AT3G14310	#1E6B52	Uncut	NON_TF
AT2G33580	#1E6B52	Uncut	NON_TF
AT3G23250	#1E6B52	Uncut	TF
AT3G59700	#1E6B52	Uncut	NON_TF
AT3G48690	#1E6B52	Uncut	NON_TF
AT3G10930	#1E6B52	Uncut	NON_TF
AT5G04020	#1E6B52	Uncut	NON_TF
AT4G16280	#1E6B52	Uncut	NON_TF
AT3G51820	#1E6B52	Uncut	NON_TF
AT4G24460	#1E6B52	Uncut	NON_TF
AT3G05750	#1E6B52	Uncut	NON_TF
AT2G26550	#1E6B52	Uncut	NON_TF
AT4G35760	#1E6B52	Uncut	NON_TF
AT4G17150	#1E6B52	Uncut	NON_TF
AT3G61150	#1E6B52	Uncut	TF
AT5G45500	#1E6B52	Uncut	NON_TF
AT5G20580	#1E6B52	Uncut	NON_TF
AT2G31030	#1E6B52	Uncut	NON_TF
AT5G44440	#1E6B52	Uncut	NON_TF
AT3G16175	#1E6B52	Uncut	NON_TF
AT1G69485	#1E6B52	Uncut	NON_TF
AT3G52720	#1E6B52	Uncut	NON_TF
AT1G60130	#1E6B52	Uncut	NON_TF
AT2G35637	#1E6B52	Uncut	NON_TF
AT3G20870	#1E6B52	Uncut	NON_TF
AT2G41040	#1E6B52	Uncut	NON_TF
AT5G23520	#1E6B52	Uncut	NON_TF
AT5G67190	#1E6B52	Uncut	TF
AT2G22500	#1E6B52	Uncut	NON_TF
AT1G31470	#1E6B52	Uncut	NON_TF
AT2G39950	#1E6B52	Uncut	NON_TF
AT1G51220	#FFD602	Uncut and 3hpc	TF
AT2G22830	#1E6B52	Uncut	NON_TF
AT5G58940	#1E6B52	Uncut	NON_TF
AT4G27470	#1E6B52	Uncut	NON_TF
AT2G38270	#1E6B52	Uncut	NON_TF
AT1G59980	#1E6B52	Uncut	NON_TF
AT1G52210	#1E6B52	Uncut	NON_TF
AT4G00340	#1E6B52	Uncut	NON_TF
AT5G02240	#1E6B52	Uncut	NON_TF
AT1G62770	#1E6B52	Uncut	NON_TF
AT4G33800	#1E6B52	Uncut	NON_TF
AT3G23970	#A69363	3hpc	NON_TF
AT2G07704	#A69363	3hpc	NON_TF
AT1G68890	#A69363	3hpc	NON_TF
AT2G42150	#FFD602	Uncut and 3hpc	TF
AT5G22090	#1E6B52	Uncut	NON_TF
AT5G10610	#1E6B52	Uncut	NON_TF
AT5G43170	#A69363	3hpc	TF
AT5G47850	#1E6B52	Uncut	NON_TF
AT4G16500	#1E6B52	Uncut	NON_TF
AT4G14940	#1E6B52	Uncut	NON_TF
AT4G38620	#1E6B52	Uncut	TF
AT5G07010	#1E6B52	Uncut	NON_TF
AT1G71390	#1E6B52	Uncut	NON_TF
AT4G18050	#1E6B52	Uncut	NON_TF
AT1G19000	#1E6B52	Uncut	TF
AT3G62580	#1E6B52	Uncut	NON_TF
AT2G29900	#1E6B52	Uncut	NON_TF
AT3G06330	#1E6B52	Uncut	NON_TF
AT2G34180	#1E6B52	Uncut	NON_TF
AT2G10950	#1E6B52	Uncut	TF
AT1G30845	#1E6B52	Uncut	NON_TF
AT5G62560	#1E6B52	Uncut	NON_TF
AT5G19025	#1E6B52	Uncut	NON_TF
AT1G02010	#1E6B52	Uncut	NON_TF
AT4G29380	#1E6B52	Uncut	NON_TF
AT2G22950	#1E6B52	Uncut	NON_TF
AT1G31150	#1E6B52	Uncut	NON_TF
AT1G13260	#1E6B52	Uncut	TF
AT2G33740	#1E6B52	Uncut	NON_TF
AT2G45660	#FFD602	Uncut and 3hpc	TF
AT1G65380	#1E6B52	Uncut	NON_TF
AT3G05675	#1E6B52	Uncut	NON_TF
AT1G73730	#1E6B52	Uncut	TF
AT2G04400	#1E6B52	Uncut	NON_TF
AT5G17710	#1E6B52	Uncut	NON_TF
AT1G63970	#1E6B52	Uncut	NON_TF
AT4G25770	#1E6B52	Uncut	NON_TF
AT5G14970	#1E6B52	Uncut	NON_TF
AT4G02550	#1E6B52	Uncut	NON_TF
AT3G53850	#1E6B52	Uncut	NON_TF
AT3G48600	#A69363	3hpc	TF
AT4G28210	#A69363	3hpc	NON_TF
AT4G20760	#1E6B52	Uncut	NON_TF
AT5G25910	#1E6B52	Uncut	NON_TF
AT2G02390	#1E6B52	Uncut	NON_TF
AT3G50060	#1E6B52	Uncut	TF
AT5G60120	#1E6B52	Uncut	TF
AT3G47060	#1E6B52	Uncut	NON_TF
AT4G18880	#1E6B52	Uncut	TF
AT5G45340	#1E6B52	Uncut	NON_TF
AT2G02230	#1E6B52	Uncut	NON_TF
AT5G12870	#1E6B52	Uncut	TF
AT1G01900	#1E6B52	Uncut	NON_TF
AT4G16110	#1E6B52	Uncut	TF
AT2G04880	#1E6B52	Uncut	TF
AT1G31230	#1E6B52	Uncut	NON_TF
AT3G06510	#1E6B52	Uncut	NON_TF
AT2G18380	#FFD602	Uncut and 3hpc	TF
AT3G30350	#1E6B52	Uncut	NON_TF
AT5G44450	#1E6B52	Uncut	NON_TF
AT4G02790	#1E6B52	Uncut	NON_TF
AT3G42670	#A69363	3hpc	TF
AT2G17442	#A69363	3hpc	NON_TF
AT3G23370	#A69363	3hpc	NON_TF
AT2G34400	#A69363	3hpc	NON_TF
AT1G65480	#A69363	3hpc	NON_TF
AT5G18560	#1E6B52	Uncut	TF
AT2G05910	#1E6B52	Uncut	NON_TF
AT4G34890	#1E6B52	Uncut	NON_TF
AT4G13840	#1E6B52	Uncut	NON_TF
AT1G29160	#1E6B52	Uncut	TF
AT1G70410	#1E6B52	Uncut	NON_TF
AT1G42990	#1E6B52	Uncut	TF
AT4G24530	#1E6B52	Uncut	NON_TF
AT2G30730	#1E6B52	Uncut	NON_TF
AT1G75400	#1E6B52	Uncut	NON_TF
AT3G16570	#1E6B52	Uncut	NON_TF
AT4G30080	#1E6B52	Uncut	TF
AT5G17520	#1E6B52	Uncut	NON_TF
AT2G01940	#1E6B52	Uncut	TF
AT4G37480	#1E6B52	Uncut	NON_TF
AT1G75390	#FFD602	Uncut and 3hpc	TF
AT1G75388	#FFD602	Uncut and 3hpc	NON_TF
AT3G45750	#1E6B52	Uncut	NON_TF
AT3G01220	#1E6B52	Uncut	TF
AT5G21100	#1E6B52	Uncut	NON_TF
AT2G35840	#1E6B52	Uncut	NON_TF
AT4G25470	#1E6B52	Uncut	TF
AT4G25490	#1E6B52	Uncut	TF
AT5G43950	#1E6B52	Uncut	NON_TF
AT4G28380	#1E6B52	Uncut	NON_TF
AT3G54340	#1E6B52	Uncut	TF
AT4G00370	#1E6B52	Uncut	NON_TF
AT3G19450	#1E6B52	Uncut	NON_TF
AT1G18265	#1E6B52	Uncut	NON_TF
AT4G33030	#1E6B52	Uncut	NON_TF
AT3G02550	#1E6B52	Uncut	TF
AT1G30530	#1E6B52	Uncut	NON_TF
AT1G35460	#1E6B52	Uncut	TF
AT5G15600	#1E6B52	Uncut	NON_TF
AT3G62150	#1E6B52	Uncut	NON_TF
AT1G18670	#1E6B52	Uncut	NON_TF
AT4G08930	#1E6B52	Uncut	NON_TF
AT3G49530	#1E6B52	Uncut	TF
AT5G56150	#1E6B52	Uncut	NON_TF
AT5G10190	#1E6B52	Uncut	NON_TF
AT1G30210	#1E6B52	Uncut	TF
AT1G10360	#1E6B52	Uncut	NON_TF
AT4G20840	#1E6B52	Uncut	NON_TF
AT5G46590	#FFD602	Uncut and 3hpc	TF
AT1G16370	#1E6B52	Uncut	NON_TF
AT1G14540	#A69363	3hpc	NON_TF
AT2G31880	#1E6B52	Uncut	NON_TF
AT3G47540	#1E6B52	Uncut	NON_TF
AT5G67230	#1E6B52	Uncut	NON_TF
AT1G26810	#1E6B52	Uncut	NON_TF
AT3G21550	#1E6B52	Uncut	NON_TF
AT3G02690	#1E6B52	Uncut	NON_TF
AT3G47570	#1E6B52	Uncut	NON_TF
AT5G52540	#1E6B52	Uncut	NON_TF
AT1G67470	#1E6B52	Uncut	NON_TF
AT5G18350	#1E6B52	Uncut	NON_TF
AT5G07380	#1E6B52	Uncut	NON_TF
AT4G29790	#1E6B52	Uncut	NON_TF
AT5G11140	#1E6B52	Uncut	NON_TF
AT3G56700	#1E6B52	Uncut	NON_TF
AT1G31480	#1E6B52	Uncut	NON_TF
AT4G37190	#1E6B52	Uncut	NON_TF
AT2G23320	#1E6B52	Uncut	TF
AT3G22170	#1E6B52	Uncut	TF
AT3G19340	#1E6B52	Uncut	NON_TF
AT1G69310	#1E6B52	Uncut	TF
AT5G25440	#1E6B52	Uncut	NON_TF
AT4G19870	#1E6B52	Uncut	NON_TF
AT5G49300	#1E6B52	Uncut	TF
AT4G19100	#1E6B52	Uncut	NON_TF
AT2G31020	#1E6B52	Uncut	NON_TF
AT5G64040	#1E6B52	Uncut	NON_TF
AT1G32120	#1E6B52	Uncut	NON_TF
AT5G39820	#1E6B52	Uncut	TF
AT3G16720	#1E6B52	Uncut	NON_TF
AT5G11650	#1E6B52	Uncut	NON_TF
AT2G40610	#1E6B52	Uncut	NON_TF
AT1G26100	#1E6B52	Uncut	NON_TF
AT2G45680	#1E6B52	Uncut	TF
AT5G44240	#1E6B52	Uncut	NON_TF
AT1G02660	#1E6B52	Uncut	NON_TF
AT1G76890	#1E6B52	Uncut	TF
AT3G02875	#1E6B52	Uncut	NON_TF
AT4G37260	#1E6B52	Uncut	TF
AT4G09630	#1E6B52	Uncut	NON_TF
AT3G47620	#1E6B52	Uncut	TF
AT4G27730	#1E6B52	Uncut	NON_TF
AT3G60370	#1E6B52	Uncut	NON_TF
AT5G15410	#1E6B52	Uncut	NON_TF
AT5G26170	#1E6B52	Uncut	TF
AT1G70370	#1E6B52	Uncut	NON_TF
AT1G47870	#1E6B52	Uncut	TF
AT2G30695	#1E6B52	Uncut	NON_TF
AT5G53290	#1E6B52	Uncut	TF
AT3G14180	#1E6B52	Uncut	TF
AT1G60550	#1E6B52	Uncut	NON_TF
AT3G60530	#1E6B52	Uncut	TF
AT5G54470	#1E6B52	Uncut	TF
AT3G13700	#1E6B52	Uncut	NON_TF
AT3G13710	#1E6B52	Uncut	NON_TF
AT4G18170	#1E6B52	Uncut	TF
AT3G16770	#1E6B52	Uncut	TF
AT2G45340	#1E6B52	Uncut	NON_TF
AT3G04890	#1E6B52	Uncut	NON_TF
AT5G63420	#1E6B52	Uncut	TF
AT3G51080	#1E6B52	Uncut	TF
AT3G24590	#1E6B52	Uncut	NON_TF
AT4G18270	#1E6B52	Uncut	NON_TF
AT2G28650	#1E6B52	Uncut	NON_TF
AT4G28140	#1E6B52	Uncut	TF
AT2G25460	#1E6B52	Uncut	NON_TF
AT5G38820	#1E6B52	Uncut	NON_TF
AT5G41920	#FFD602	Uncut and 3hpc	TF
AT3G24650	#1E6B52	Uncut	TF
AT3G62540	#1E6B52	Uncut	NON_TF
AT5G58080	#1E6B52	Uncut	TF
AT3G13380	#1E6B52	Uncut	NON_TF
AT4G18740	#1E6B52	Uncut	NON_TF
AT5G50570	#1E6B52	Uncut	TF
AT1G77640	#1E6B52	Uncut	TF
AT4G39350	#1E6B52	Uncut	NON_TF
AT2G32080	#1E6B52	Uncut	NON_TF
AT1G68840	#1E6B52	Uncut	TF
AT4G36988	#1E6B52	Uncut	NON_TF
AT3G57230	#1E6B52	Uncut	TF
AT2G02950	#1E6B52	Uncut	NON_TF
AT3G02990	#1E6B52	Uncut	TF
AT1G55850	#1E6B52	Uncut	NON_TF
AT4G24020	#1E6B52	Uncut	TF
AT3G54850	#1E6B52	Uncut	NON_TF
AT4G27950	#1E6B52	Uncut	TF
AT3G55260	#1E6B52	Uncut	NON_TF
AT1G72050	#1E6B52	Uncut	TF
AT1G56580	#1E6B52	Uncut	NON_TF
AT1G51140	#1E6B52	Uncut	TF
AT5G51640	#1E6B52	Uncut	NON_TF
AT2G24260	#1E6B52	Uncut	TF
AT3G16010	#1E6B52	Uncut	NON_TF
AT3G15270	#1E6B52	Uncut	TF
AT1G12220	#1E6B52	Uncut	NON_TF
AT5G67580	#1E6B52	Uncut	TF
AT1G54150	#1E6B52	Uncut	NON_TF
AT3G24120	#1E6B52	Uncut	TF
AT5G47650	#1E6B52	Uncut	NON_TF
AT4G36780	#1E6B52	Uncut	TF
AT5G48810	#1E6B52	Uncut	NON_TF
AT3G45610	#A69363	3hpc	TF
AT5G56620	#A69363	3hpc	TF
AT2G35700	#A69363	3hpc	TF
AT5G55220	#A69363	3hpc	NON_TF
AT5G05790	#A69363	3hpc	TF
AT1G72360	#A69363	3hpc	TF
AT3G53130	#A69363	3hpc	NON_TF
AT4G01550	#A69363	3hpc	TF
AT2G17695	#A69363	3hpc	NON_TF
AT1G18570	#A69363	3hpc	TF
AT5G46580	#A69363	3hpc	NON_TF
AT1G32060	#A69363	3hpc	NON_TF
AT1G74580	#A69363	3hpc	NON_TF
AT3G01440	#A69363	3hpc	NON_TF
AT2G16270	#A69363	3hpc	NON_TF
AT5G24318	#A69363	3hpc	NON_TF
AT4G06746	#A69363	3hpc	TF
AT4G16820	#A69363	3hpc	NON_TF
AT1G74650	#A69363	3hpc	TF
AT5G12270	#A69363	3hpc	NON_TF
AT4G16146	#A69363	3hpc	NON_TF
AT4G24540	#A69363	3hpc	TF
AT5G25160	#A69363	3hpc	TF
AT5G66940	#A69363	3hpc	TF
AT1G07850	#A69363	3hpc	NON_TF
AT2G44810	#A69363	3hpc	NON_TF
AT1G48310	#A69363	3hpc	TF
AT5G66430	#A69363	3hpc	NON_TF
AT1G68350	#A69363	3hpc	NON_TF
AT3G25640	#A69363	3hpc	NON_TF
AT1G12320	#A69363	3hpc	NON_TF
AT5G06380	#A69363	3hpc	NON_TF
AT5G66490	#A69363	3hpc	NON_TF
AT1G67810	#A69363	3hpc	NON_TF
AT5G06570	#A69363	3hpc	NON_TF
AT5G37070	#A69363	3hpc	NON_TF
AT3G11260	#A69363	3hpc	TF
AT3G05640	#A69363	3hpc	NON_TF
AT5G24660	#A69363	3hpc	NON_TF
AT2G34290	#A69363	3hpc	NON_TF
AT1G77280	#A69363	3hpc	NON_TF
AT5G40000	#A69363	3hpc	NON_TF
AT5G03150	#A69363	3hpc	TF
AT3G56400	#A69363	3hpc	TF
AT1G49380	#A69363	3hpc	NON_TF
AT4G38000	#A69363	3hpc	TF
AT4G13572	#A69363	3hpc	NON_TF
AT5G51990	#A69363	3hpc	TF
AT5G20635	#A69363	3hpc	NON_TF
AT3G60490	#A69363	3hpc	TF
AT5G46110	#A69363	3hpc	NON_TF
AT2G36750	#A69363	3hpc	NON_TF
AT1G33475	#A69363	3hpc	NON_TF
AT4G11070	#A69363	3hpc	TF
AT5G14570	#A69363	3hpc	NON_TF
AT1G01070	#A69363	3hpc	NON_TF
AT1G16750	#A69363	3hpc	NON_TF
AT1G67070	#A69363	3hpc	NON_TF
AT4G18650	#A69363	3hpc	NON_TF
AT3G08560	#A69363	3hpc	NON_TF
AT1G55110	#A69363	3hpc	TF
AT2G27240	#A69363	3hpc	NON_TF
AT1G08440	#A69363	3hpc	NON_TF
AT1G66600	#A69363	3hpc	TF
AT3G59200	#A69363	3hpc	NON_TF
AT5G13170	#A69363	3hpc	NON_TF
AT5G43180	#A69363	3hpc	NON_TF
AT5G48850	#A69363	3hpc	NON_TF
AT4G21680	#A69363	3hpc	NON_TF
AT2G44460	#A69363	3hpc	NON_TF
AT2G20400	#A69363	3hpc	TF
AT3G58430	#A69363	3hpc	NON_TF
AT2G19920	#A69363	3hpc	NON_TF
AT1G79520	#A69363	3hpc	NON_TF
AT5G14870	#A69363	3hpc	NON_TF
AT3G50260	#A69363	3hpc	TF
AT4G26200	#A69363	3hpc	NON_TF
AT2G40180	#A69363	3hpc	NON_TF
AT1G69900	#A69363	3hpc	NON_TF
AT1G07000	#A69363	3hpc	NON_TF
AT1G55450	#A69363	3hpc	NON_TF
AT3G46610	#A69363	3hpc	NON_TF
AT5G06100	#A69363	3hpc	TF
AT1G62960	#A69363	3hpc	NON_TF
AT4G38390	#A69363	3hpc	NON_TF
AT5G49120	#A69363	3hpc	NON_TF
AT1G12700	#A69363	3hpc	NON_TF
AT5G51370	#A69363	3hpc	NON_TF
AT5G39260	#A69363	3hpc	NON_TF
AT3G06570	#A69363	3hpc	NON_TF
AT5G65530	#A69363	3hpc	NON_TF
AT1G73190	#A69363	3hpc	NON_TF
AT1G11440	#A69363	3hpc	NON_TF
AT4G33280	#A69363	3hpc	TF
AT5G23930	#A69363	3hpc	TF
AT4G01533	#A69363	3hpc	NON_TF
AT1G23210	#A69363	3hpc	NON_TF
AT4G29060	#A69363	3hpc	NON_TF
AT5G53950	#A69363	3hpc	TF
AT2G24820	#A69363	3hpc	NON_TF
AT4G14860	#A69363	3hpc	TF
AT2G07694	#A69363	3hpc	NON_TF
AT2G07735	#A69363	3hpc	NON_TF
AT2G07806	#A69363	3hpc	NON_TF
AT5G63090	#A69363	3hpc	TF
AT4G26120	#A69363	3hpc	TF
AT3G18080	#A69363	3hpc	NON_TF
AT4G21650	#A69363	3hpc	NON_TF
AT5G42825	#A69363	3hpc	NON_TF
AT2G43800	#A69363	3hpc	NON_TF
AT3G28580	#A69363	3hpc	NON_TF
AT5G51545	#A69363	3hpc	NON_TF
AT1G70820	#A69363	3hpc	NON_TF
AT3G09010	#A69363	3hpc	NON_TF
AT3G50410	#A69363	3hpc	TF
AT2G32200	#A69363	3hpc	NON_TF
AT4G36740	#A69363	3hpc	TF
AT3G24770	#A69363	3hpc	NON_TF
AT5G62940	#A69363	3hpc	TF
AT5G59100	#A69363	3hpc	NON_TF
AT3G57380	#A69363	3hpc	NON_TF
AT3G17730	#A69363	3hpc	TF
AT5G12900	#A69363	3hpc	NON_TF
AT3G59930	#A69363	3hpc	NON_TF
AT3G25170	#A69363	3hpc	NON_TF
AT5G59130	#A69363	3hpc	NON_TF
AT5G59120	#A69363	3hpc	NON_TF
AT3G47500	#A69363	3hpc	TF
AT1G19530	#A69363	3hpc	NON_TF
AT4G39110	#A69363	3hpc	NON_TF
AT3G04040	#A69363	3hpc	NON_TF
AT3G05858	#A69363	3hpc	NON_TF
AT5G59090	#A69363	3hpc	NON_TF
AT5G58840	#A69363	3hpc	NON_TF
AT3G04070	#A69363	3hpc	TF
AT1G05490	#A69363	3hpc	TF
AT1G66920	#A69363	3hpc	NON_TF
AT2G29120	#A69363	3hpc	NON_TF
AT1G71460	#A69363	3hpc	NON_TF
AT2G22750	#A69363	3hpc	TF
AT3G53720	#A69363	3hpc	NON_TF
AT5G39610	#A69363	3hpc	TF
AT1G76130	#A69363	3hpc	NON_TF
AT5G23020	#A69363	3hpc	NON_TF
AT1G02310	#A69363	3hpc	NON_TF
AT4G27920	#A69363	3hpc	NON_TF
AT3G26620	#A69363	3hpc	TF
AT5G57030	#A69363	3hpc	NON_TF
AT1G66720	#A69363	3hpc	NON_TF
AT1G63930	#A69363	3hpc	NON_TF
AT1G18960	#A69363	3hpc	TF
AT2G39530	#A69363	3hpc	NON_TF
AT2G39010	#A69363	3hpc	NON_TF
AT1G55560	#A69363	3hpc	NON_TF
AT1G30650	#A69363	3hpc	TF
AT1G22550	#A69363	3hpc	NON_TF
AT2G40230	#A69363	3hpc	NON_TF
AT3G01480	#A69363	3hpc	NON_TF
AT5G10180	#A69363	3hpc	NON_TF
AT5G13910	#A69363	3hpc	TF
AT5G47560	#A69363	3hpc	NON_TF
AT4G31060	#A69363	3hpc	TF
AT3G44020	#A69363	3hpc	NON_TF
AT2G46680	#A69363	3hpc	TF
AT2G27830	#A69363	3hpc	NON_TF
AT2G42430	#A69363	3hpc	TF
AT3G30210	#A69363	3hpc	TF
AT5G62630	#A69363	3hpc	NON_TF
AT4G31760	#A69363	3hpc	NON_TF
AT2G35940	#A69363	3hpc	TF
AT1G06680	#A69363	3hpc	NON_TF
AT1G69570	#A69363	3hpc	TF
AT1G69572	#A69363	3hpc	NON_TF
AT1G28360	#A69363	3hpc	TF
AT3G02730	#A69363	3hpc	NON_TF
AT3G06490	#A69363	3hpc	TF
AT4G25560	#A69363	3hpc	TF
AT1G32510	#A69363	3hpc	TF
AT1G06520	#A69363	3hpc	NON_TF
AT1G59740	#A69363	3hpc	NON_TF
AT4G18350	#A69363	3hpc	NON_TF
AT2G26740	#A69363	3hpc	NON_TF
AT3G01970	#A69363	3hpc	TF
AT1G16360	#A69363	3hpc	NON_TF
AT3G46070	#A69363	3hpc	TF
AT1G15610	#A69363	3hpc	NON_TF
AT1G35560	#A69363	3hpc	TF
AT1G49990	#A69363	3hpc	NON_TF
AT1G68200	#A69363	3hpc	TF
AT2G16630	#A69363	3hpc	NON_TF
AT1G77730	#A69363	3hpc	NON_TF
AT1G69790	#A69363	3hpc	NON_TF
AT1G72210	#A69363	3hpc	TF
AT3G61160	#A69363	3hpc	NON_TF
AT5G24110	#A69363	3hpc	TF
AT4G28085	#A69363	3hpc	NON_TF
AT5G39090	#A69363	3hpc	NON_TF
AT5G14960	#A69363	3hpc	TF
AT3G57740	#A69363	3hpc	NON_TF
AT4G00940	#A69363	3hpc	TF
AT2G38300	#A69363	3hpc	TF
AT2G29320	#A69363	3hpc	NON_TF
AT4G00730	#A69363	3hpc	TF
AT5G13410	#A69363	3hpc	NON_TF

## Sheet: Uncut functional enrichment
GroupID	Category	Term	Description	LogP	Log(q-value)	InTerm_InList	Genes	Symbols
1_Summary	GO Biological Processes	GO:1901001	negative regulation of response to salt stress	-5.03966	-1.86093	6/14	828657,829880,830751,832234,836329,837529,842938,815863,816346,818403,820264,823861,825139,831648,832270,834976,836134,836739,836753,841622	SLK1,MYB73,AT5G08520,AT5G21100,SLK2,RAS1,MYB20,SERK5,HBI1,AT2G38240,AT3G10930,AT3G47080,HLECRK,MYB56,AT5G22090,AT5G49170,TOE2,AT5G66070,CPK28,LYK3
2_Summary	GO Biological Processes	GO:0045893	positive regulation of DNA-templated transcription	-4.97838	-1.86093	33/363	815035,816622,818273,819296,819365,819997,820317,820929,821781,822061,824272,824601,824703,824890,825224,827622,828653,828771,829044,829611,830169,830341,830751,830800,831127,831648,834719,836359,838219,838793,840317,841395,842938,823994,814725,822475,840510,836101,818429,825347,828385,832270,833577,821998,828521	ZAP1,ERF53,SIGF,CCA1,ERF71,MYB83,MYB65,EBP,FHY3,ABI3,GATA6,AP3,OBP3,AGL16,GATA4,HSF A4A,CBF1,WRKY20,NAC075,GBF6,HB16,AGL99,AT5G08520,EICBP.B,MYB46,MYB56,MYC3,NAC101,MYB58,DREB26,NAC016,ABF1,MYB20,BT2,SGR5,CLE25,AT1G36060,MBD7,WRKY33,SDG14,AT4G22860,AT5G22090,AT5G35910,AT3G24120,AT4G24200
3_Summary	GO Biological Processes	GO:2000652	regulation of secondary cell wall biogenesis	-4.62573	-1.74126	10/50	819289,819997,826470,829044,829773,831127,836762,838219,842602,842938,826365,836359,819296,830557,837951	GulLO6,MYB83,CRY1,NAC075,NAC076,MYB46,NAC105,MYB58,KNAT7,MYB20,AT4G08160,NAC101,CCA1,SPC98,AT1G02650
4_Summary	GO Biological Processes	GO:0031347	regulation of defense response	-4.26631	-1.53208	52/737	815863,816279,816346,816958,817084,817746,818403,820713,820792,822298,823911,823916,823989,823990,824329,824453,825139,826407,826470,827348,827910,828348,828877,829413,829589,830334,831037,831173,832234,832618,834178,834586,834836,835807,836134,836376,836514,836753,837302,837321,837674,838448,839126,839544,841622,841792,843373,843939,844099,844364,844423,5008138,814836,818429,818533,819368,819556…	SERK5,AT2G17705,HBI1,AT2G24240,AT2G25460,SOBIR1,AT2G38240,AT3G14840,AT3G15530,PAD3,AT3G47570,TCP14,CYP71A22,CYP71A21,AT3G51660,AT3G52870,HLECRK,MAPKKK9,CRY1,AT4G16500,AT4G02550,AT4G22530,AT4G27652,VTE1,XLG2,AT5G04550,AT5G11650,PBS3,AT5G21100,AT5G25440,AT5G41750,AT5G45500,CCR4,AT5G57035,TOE2,AT5G62560,AT5G63930,CPK28,AT1G07870,AT1G08050,AT1G11320,IBS1,AT1G25400,AT1G02660,LYK3,MAP3KA,PG2,AT1G76070,…
5_Summary	GO Biological Processes	GO:0071456	cellular response to hypoxia	-3.96775	-1.38309	23/241	816783,818701,819248,819365,821112,824140,826771,828856,831173,834244,834570,834842,835535,835587,837302,837886,838430,839180,841843,842922,843197,843216,5008138,823908,828891,835789	UCP5,CAMBP25,WRKY46,ERF71,LBD41,PSK4,AT-HSFB2B,RMA3,PBS3,CML37,CYP707A3,RBOHD,BBX29,PDC2,AT1G07870,RAV1,AT1G18490,AT1G26380,AT1G54050,AT1G66080,AT1G68670,RAV2,RTFL12,AT3G47540,ACBP2,BGAL4
6_Summary	GO Biological Processes	GO:0048827	phyllome development	-3.54078	-1.04166	49/730	814725,815176,815863,816194,816846,816928,817084,817438,818533,818820,818898,819309,820200,820317,820551,824112,824229,824706,824755,827123,827125,827297,827425,828657,828908,830360,830454,831648,831974,834044,834069,834345,835126,835238,835410,835789,836329,836544,836617,836742,837048,837321,837886,839901,840511,841899,842254,842873,843024,824601,825287,835724	SGR5,GRF6,SERK5,AMS,PUB4,AT2G23950,AT2G25460,PLL4,ABCB6,SPL9,AT2G42960,CYP709B2,ROXY1,MYB65,OVA5,RDR6,DWF4,OVA1,AT3G55890,PPD1,AT4G14720,RR2,AT4G17150,SLK1,CRF4,AT5G04810,ATE1,MYB56,PUCHI,AT5G40460,AT5G40690,SPL2,SPL13A,YLS7,CRF3,BGAL4,SLK2,AT5G64230,CPR5,LARP1b,CVP2,AT1G08050,RAV1,TCP24,AT1G36070,PES1,BPEp,AS2,TRM22,AP3,HDG1,HAP8
7_Summary	GO Biological Processes	GO:0006714	sesquiterpenoid metabolic process	-3.47875	-1.01454	7/34	819554,827663,834491,834570,837235,838224,843028	AT3G03990,CYP707A1,AT5G44630,CYP707A3,UGT71C5,ABA3,ABA4
8_Summary	GO Biological Processes	GO:0009751	response to salicylic acid	-3.45908	-1.01454	33/435	815035,816258,816958,817084,819248,823620,823989,823990,823994,824140,824257,827348,828348,828877,830751,831173,831802,832069,834044,834069,834178,834586,834836,834904,835391,835807,837321,837674,838793,839126,843111,843373,844423	ZAP1,IRE1A,AT2G24240,AT2G25460,WRKY46,FAMT,CYP71A22,CYP71A21,BT2,PSK4,BCS1,AT4G16500,AT4G22530,AT4G27652,AT5G08520,PBS3,MYB3R-5,AT5G19490,AT5G40460,AT5G40690,AT5G41750,AT5G45500,CCR4,DIR1,AT5G53110,AT5G57035,AT1G08050,AT1G11320,DREB26,AT1G25400,AT1G67850,PG2,WRKY40
9_Summary	GO Biological Processes	GO:0040008	regulation of growth	-3.44308	-1.01454	28/347	816928,818657,819014,820317,820907,820974,821892,824004,824193,825160,826470,827297,827350,830169,830334,830751,831091,831395,831412,831648,837817,839323,839721,839816,840104,842849,843970,3766807	AT2G23950,AT2G40620,ARL,MYB65,RALF23,RFC3,AT3G23160,AT3G48450,MAPKKK20,ARGOS,CRY1,RR2,RGF6,HB16,AT5G04550,AT5G08520,CPK17,AT5G15430,SP1L4,MYB56,DDF1,SPI,RALFL4,ML5,AT1G32120,CLV2,AT1G76380,LCR31
10_Summary	GO Biological Processes	GO:0035556	intracellular signal transduction	-3.12047	-0.838055	22/259	817680,820907,820929,821339,822108,825146,827297,827576,828877,829059,831393,833552,834842,837048,837421,839721,840957,842992,843060,843708,5008017,5008138,825160,829335	ERF15,RALF23,EBP,LST8-1,RALFL25,SAC9,RR2,AT4G18450,AT4G27652,VPS15,DND1,HK2,RBOHD,CVP2,NP1,RALFL4,VIP1,SGA2,AT1G67400,EIL3,AT3G21295,RTFL12,ARGOS,KNAT5
11_Summary	GO Biological Processes	GO:0051606	detection of stimulus	-3.01975	-0.767302	9/64	814725,814823,821781,826470,829335,831173,835039,838430,840038	SGR5,PKS1,FHY3,CRY1,KNAT5,PBS3,AT5G49760,AT1G18490,SGR2
12_Summary	GO Biological Processes	GO:0045927	positive regulation of growth	-2.96307	-0.738654	7/41	819014,821892,825160,830334,830751,839323,839816	ARL,AT3G23160,ARGOS,AT5G04550,AT5G08520,SPI,ML5
13_Summary	GO Biological Processes	GO:0006778	porphyrin-containing compound metabolic process	-2.88027	-0.72091	19/219	817196,818633,819085,820115,821520,824034,824329,824345,826719,828720,829413,831272,834069,834408,834976,836338,838417,842700,844024	HO2,AT2G40400,AT2G44760,AT3G09580,NTMC2T5.2,GSA2,AT3G51660,G4,AT4G11175,BGAL12,VTE1,HEMG2,AT5G40690,CLH2,AT5G49170,TRM25,AT1G18360,ISPF,GT2
14_Summary	GO Biological Processes	GO:0005976	polysaccharide metabolic process	-2.8707	-0.72091	32/452	816699,816821,818076,819368,819646,820651,821127,822422,822556,823949,824083,826365,828067,828990,830090,830368,831618,831716,832209,832850,833302,834418,835558,836343,836359,836858,837716,838001,839224,842035,842651,6241352	PE11,AT2G22900,ARAD1,AT2G47550,AT3G04860,PME3,LSF1,AT3G27980,PME31,AT3G47940,AT3G49220,AT4G08160,AT4G02320,AT4G28706,CESA2,AT5G04885,RCP1,TBL35,AT5G20860,AT5G27870,XGD1,AT5G43950,GAUT12,GT18,NAC101,IRX14-L,SS3,AT1G14390,GALT1,CSLE1,RHS8,AT2G41451
15_Summary	GO Biological Processes	GO:0071396	cellular response to lipid	-2.7112	-0.629461	35/520	817084,817623,818255,818533,819014,819554,820317,821520,823994,824131,824193,824229,827152,827928,828682,830708,830883,831648,832686,833552,834044,836617,836854,838072,838377,838470,839277,839345,839580,841395,841537,841622,843876,843939,843970,819308,819556,820929,823620,823861,824004,824329,828348,829873,830334,830592,831037,831426,831784,834114,834164,834584,834719,834990,837321,838793,839126,…	AT2G25460,AT2G30720,GAMMA-TIP,ABCB6,ARL,AT3G03990,MYB65,NTMC2T5.2,BT2,MYB84,MAPKKK20,DWF4,AO1,AT4G03420,AT4G25770,BIM1,AT5G10190,MYB56,WRKY50,HK2,AT5G40460,CPR5,DEAR2,LPP2,AT1G17970,CDPK1,ABCC5,EFE,NAC001,ABF1,FBH3,LYK3,AT1G75400,AT1G76070,AT1G76380,AT2G46940,AT3G04010,EBP,FAMT,AT3G47080,AT3G48450,AT3G51660,AT4G22530,AT4G37190,AT5G04550,ST2A,AT5G11650,AT5G02940,AT5G02230,AT5G41120,AT5G41620,AT5G4…
16_Summary	GO Biological Processes	GO:1902347	response to strigolactone	-2.70477	-0.629461	3/7	819554,826470,837231	AT3G03990,CRY1,AT1G07200
17_Summary	GO Biological Processes	GO:0009651	response to salt stress	-2.69627	-0.629461	39/599	816622,816958,817623,818429,818665,818701,819556,820264,821904,823994,824193,824727,826860,828877,830334,830751,831037,831498,832234,833552,833873,834178,834471,835652,836011,836866,836881,837529,837817,838207,838224,838952,839277,839323,840037,842111,843262,843939,5008138	ERF53,AT2G24240,AT2G30720,WRKY33,AT2G40700,CAMBP25,AT3G04010,AT3G10930,MYB15,BT2,MAPKKK20,P5CS2,EARLI1,AT4G27652,AT5G04550,AT5G08520,AT5G11650,AAE5,AT5G21100,HK2,AT5G38820,AT5G41750,AT5G44440,AT5G55580,CRCK1,CYP81G1,ZF1,RAS1,DDF1,OCT6,ABA3,AT1G23440,ABCC5,SPI,NFD4,PGN,WRKY57,AT1G76070,RTFL12
18_Summary	GO Biological Processes	GO:1902930	regulation of alcohol biosynthetic process	-2.64338	-0.604007	5/24	821339,822475,830751,840510,841899,827017,837817	LST8-1,CLE25,AT5G08520,AT1G36060,PES1,J20,DDF1
19_Summary	GO Biological Processes	GO:0043068	positive regulation of programmed cell death	-2.64338	-0.604007	5/24	820317,829589,831173,836359,841202,817746	MYB65,XLG2,PBS3,NAC101,ATE2F2,SOBIR1
20_Summary	GO Biological Processes	GO:0046777	protein autophosphorylation	-2.50675	-0.517548	12/120	815863,816258,824193,825139,826470,831091,832618,835039,836150,837421,838470,843389	SERK5,IRE1A,MAPKKK20,HLECRK,CRY1,CPK17,AT5G25440,AT5G49760,AT5G60280,NP1,CDPK1,CRK2
1_Member	GO Biological Processes	GO:1901001	negative regulation of response to salt stress	-5.03966	-1.86093	6/14	828657,829880,830751,832234,836329,837529	SLK1,MYB73,AT5G08520,AT5G21100,SLK2,RAS1
1_Member	GO Biological Processes	GO:1901000	regulation of response to salt stress	-3.16873	-0.854129	7/38	828657,829880,830751,832234,836329,837529,842938	SLK1,MYB73,AT5G08520,AT5G21100,SLK2,RAS1,MYB20
1_Member	GO Biological Processes	GO:0047484	regulation of response to osmotic stress	-2.60626	-0.575664	7/47	828657,829880,830751,832234,836329,837529,842938	SLK1,MYB73,AT5G08520,AT5G21100,SLK2,RAS1,MYB20
1_Member	GO Biological Processes	GO:0048585	negative regulation of response to stimulus	-2.11677	-0.238463	19/257	815863,816346,818403,820264,823861,825139,828657,829880,830751,831648,832234,832270,834976,836134,836329,836739,836753,837529,841622	SERK5,HBI1,AT2G38240,AT3G10930,AT3G47080,HLECRK,SLK1,MYB73,AT5G08520,MYB56,AT5G21100,AT5G22090,AT5G49170,TOE2,SLK2,AT5G66070,CPK28,RAS1,LYK3
2_Member	GO Biological Processes	GO:0045893	positive regulation of DNA-templated transcription	-4.97838	-1.86093	33/363	815035,816622,818273,819296,819365,819997,820317,820929,821781,822061,824272,824601,824703,824890,825224,827622,828653,828771,829044,829611,830169,830341,830751,830800,831127,831648,834719,836359,838219,838793,840317,841395,842938	ZAP1,ERF53,SIGF,CCA1,ERF71,MYB83,MYB65,EBP,FHY3,ABI3,GATA6,AP3,OBP3,AGL16,GATA4,HSF A4A,CBF1,WRKY20,NAC075,GBF6,HB16,AGL99,AT5G08520,EICBP.B,MYB46,MYB56,MYC3,NAC101,MYB58,DREB26,NAC016,ABF1,MYB20
2_Member	GO Biological Processes	GO:1902680	positive regulation of RNA biosynthetic process	-4.9289	-1.86093	33/365	815035,816622,818273,819296,819365,819997,820317,820929,821781,822061,824272,824601,824703,824890,825224,827622,828653,828771,829044,829611,830169,830341,830751,830800,831127,831648,834719,836359,838219,838793,840317,841395,842938	ZAP1,ERF53,SIGF,CCA1,ERF71,MYB83,MYB65,EBP,FHY3,ABI3,GATA6,AP3,OBP3,AGL16,GATA4,HSF A4A,CBF1,WRKY20,NAC075,GBF6,HB16,AGL99,AT5G08520,EICBP.B,MYB46,MYB56,MYC3,NAC101,MYB58,DREB26,NAC016,ABF1,MYB20
2_Member	GO Biological Processes	GO:1903508	positive regulation of nucleic acid-templated transcription	-4.9289	-1.86093	33/365	815035,816622,818273,819296,819365,819997,820317,820929,821781,822061,824272,824601,824703,824890,825224,827622,828653,828771,829044,829611,830169,830341,830751,830800,831127,831648,834719,836359,838219,838793,840317,841395,842938	ZAP1,ERF53,SIGF,CCA1,ERF71,MYB83,MYB65,EBP,FHY3,ABI3,GATA6,AP3,OBP3,AGL16,GATA4,HSF A4A,CBF1,WRKY20,NAC075,GBF6,HB16,AGL99,AT5G08520,EICBP.B,MYB46,MYB56,MYC3,NAC101,MYB58,DREB26,NAC016,ABF1,MYB20
2_Member	GO Biological Processes	GO:0010557	positive regulation of macromolecule biosynthetic process	-4.89153	-1.86093	34/383	815035,816622,818273,819296,819365,819997,820317,820929,821781,822061,823994,824272,824601,824703,824890,825224,827622,828653,828771,829044,829611,830169,830341,830751,830800,831127,831648,834719,836359,838219,838793,840317,841395,842938	ZAP1,ERF53,SIGF,CCA1,ERF71,MYB83,MYB65,EBP,FHY3,ABI3,BT2,GATA6,AP3,OBP3,AGL16,GATA4,HSF A4A,CBF1,WRKY20,NAC075,GBF6,HB16,AGL99,AT5G08520,EICBP.B,MYB46,MYB56,MYC3,NAC101,MYB58,DREB26,NAC016,ABF1,MYB20
2_Member	GO Biological Processes	GO:0031328	positive regulation of cellular biosynthetic process	-4.65686	-1.74126	37/444	814725,815035,816622,818273,819296,819365,819997,820317,820929,821781,822061,822475,823994,824272,824601,824703,824890,825224,827622,828653,828771,829044,829611,830169,830341,830751,830800,831127,831648,834719,836359,838219,838793,840317,840510,841395,842938	SGR5,ZAP1,ERF53,SIGF,CCA1,ERF71,MYB83,MYB65,EBP,FHY3,ABI3,CLE25,BT2,GATA6,AP3,OBP3,AGL16,GATA4,HSF A4A,CBF1,WRKY20,NAC075,GBF6,HB16,AGL99,AT5G08520,EICBP.B,MYB46,MYB56,MYC3,NAC101,MYB58,DREB26,NAC016,AT1G36060,ABF1,MYB20
2_Member	GO Biological Processes	GO:0045935	positive regulation of nucleobase-containing compound metabolic process	-4.27068	-1.53208	35/428	815035,816622,818273,819296,819365,819997,820317,820929,821781,822061,823994,824272,824601,824703,824890,825224,827622,828653,828771,829044,829611,830169,830341,830751,830800,831127,831648,834719,836101,836359,838219,838793,840317,841395,842938	ZAP1,ERF53,SIGF,CCA1,ERF71,MYB83,MYB65,EBP,FHY3,ABI3,BT2,GATA6,AP3,OBP3,AGL16,GATA4,HSF A4A,CBF1,WRKY20,NAC075,GBF6,HB16,AGL99,AT5G08520,EICBP.B,MYB46,MYB56,MYC3,MBD7,NAC101,MYB58,DREB26,NAC016,ABF1,MYB20
2_Member	GO Biological Processes	GO:0051254	positive regulation of RNA metabolic process	-4.26165	-1.53208	33/394	815035,816622,818273,819296,819365,819997,820317,820929,821781,822061,824272,824601,824703,824890,825224,827622,828653,828771,829044,829611,830169,830341,830751,830800,831127,831648,834719,836359,838219,838793,840317,841395,842938	ZAP1,ERF53,SIGF,CCA1,ERF71,MYB83,MYB65,EBP,FHY3,ABI3,GATA6,AP3,OBP3,AGL16,GATA4,HSF A4A,CBF1,WRKY20,NAC075,GBF6,HB16,AGL99,AT5G08520,EICBP.B,MYB46,MYB56,MYC3,NAC101,MYB58,DREB26,NAC016,ABF1,MYB20
2_Member	GO Biological Processes	GO:0009891	positive regulation of biosynthetic process	-4.21001	-1.52183	37/466	814725,815035,816622,818273,819296,819365,819997,820317,820929,821781,822061,822475,823994,824272,824601,824703,824890,825224,827622,828653,828771,829044,829611,830169,830341,830751,830800,831127,831648,834719,836359,838219,838793,840317,840510,841395,842938	SGR5,ZAP1,ERF53,SIGF,CCA1,ERF71,MYB83,MYB65,EBP,FHY3,ABI3,CLE25,BT2,GATA6,AP3,OBP3,AGL16,GATA4,HSF A4A,CBF1,WRKY20,NAC075,GBF6,HB16,AGL99,AT5G08520,EICBP.B,MYB46,MYB56,MYC3,NAC101,MYB58,DREB26,NAC016,AT1G36060,ABF1,MYB20
2_Member	GO Biological Processes	GO:0031325	positive regulation of cellular metabolic process	-3.96653	-1.38309	43/588	814725,815035,816622,818273,818429,819296,819365,819997,820317,820929,821781,822061,822475,823994,824272,824601,824703,824890,825224,825347,827622,828385,828653,828771,829044,829611,830169,830341,830751,830800,831127,831648,832270,833577,834719,836101,836359,838219,838793,840317,840510,841395,842938	SGR5,ZAP1,ERF53,SIGF,WRKY33,CCA1,ERF71,MYB83,MYB65,EBP,FHY3,ABI3,CLE25,BT2,GATA6,AP3,OBP3,AGL16,GATA4,SDG14,HSF A4A,AT4G22860,CBF1,WRKY20,NAC075,GBF6,HB16,AGL99,AT5G08520,EICBP.B,MYB46,MYB56,AT5G22090,AT5G35910,MYC3,MBD7,NAC101,MYB58,DREB26,NAC016,AT1G36060,ABF1,MYB20
2_Member	GO Biological Processes	GO:0010604	positive regulation of macromolecule metabolic process	-3.38268	-1.01104	40/569	815035,816622,818273,819296,819365,819997,820317,820929,821781,821998,822061,823994,824272,824601,824703,824890,825224,825347,827622,828385,828521,828653,828771,829044,829611,830169,830341,830751,830800,831127,831648,833577,834719,836101,836359,838219,838793,840317,841395,842938	ZAP1,ERF53,SIGF,CCA1,ERF71,MYB83,MYB65,EBP,FHY3,AT3G24120,ABI3,BT2,GATA6,AP3,OBP3,AGL16,GATA4,SDG14,HSF A4A,AT4G22860,AT4G24200,CBF1,WRKY20,NAC075,GBF6,HB16,AGL99,AT5G08520,EICBP.B,MYB46,MYB56,AT5G35910,MYC3,MBD7,NAC101,MYB58,DREB26,NAC016,ABF1,MYB20
2_Member	GO Biological Processes	GO:0051173	positive regulation of nitrogen compound metabolic process	-3.37441	-1.01104	38/532	815035,816622,818273,819296,819365,819997,820317,820929,821781,822061,823994,824272,824601,824703,824890,825224,825347,827622,828385,828653,828771,829044,829611,830169,830341,830751,830800,831127,831648,833577,834719,836101,836359,838219,838793,840317,841395,842938	ZAP1,ERF53,SIGF,CCA1,ERF71,MYB83,MYB65,EBP,FHY3,ABI3,BT2,GATA6,AP3,OBP3,AGL16,GATA4,SDG14,HSF A4A,AT4G22860,CBF1,WRKY20,NAC075,GBF6,HB16,AGL99,AT5G08520,EICBP.B,MYB46,MYB56,AT5G35910,MYC3,MBD7,NAC101,MYB58,DREB26,NAC016,ABF1,MYB20
2_Member	GO Biological Processes	GO:0009893	positive regulation of metabolic process	-2.85236	-0.713851	45/705	814725,815035,816622,818273,818429,819296,819365,819997,820317,820929,821781,821998,822061,822475,823994,824272,824601,824703,824890,825224,825347,827622,828385,828521,828653,828771,829044,829611,830169,830341,830751,830800,831127,831648,832270,833577,834719,836101,836359,838219,838793,840317,840510,841395,842938	SGR5,ZAP1,ERF53,SIGF,WRKY33,CCA1,ERF71,MYB83,MYB65,EBP,FHY3,AT3G24120,ABI3,CLE25,BT2,GATA6,AP3,OBP3,AGL16,GATA4,SDG14,HSF A4A,AT4G22860,AT4G24200,CBF1,WRKY20,NAC075,GBF6,HB16,AGL99,AT5G08520,EICBP.B,MYB46,MYB56,AT5G22090,AT5G35910,MYC3,MBD7,NAC101,MYB58,DREB26,NAC016,AT1G36060,ABF1,MYB20
3_Member	GO Biological Processes	GO:2000652	regulation of secondary cell wall biogenesis	-4.62573	-1.74126	10/50	819289,819997,826470,829044,829773,831127,836762,838219,842602,842938	GulLO6,MYB83,CRY1,NAC075,NAC076,MYB46,NAC105,MYB58,KNAT7,MYB20
3_Member	GO Biological Processes	GO:1903338	regulation of cell wall organization or biogenesis	-3.98022	-1.38309	10/59	819289,819997,826470,829044,829773,831127,836762,838219,842602,842938	GulLO6,MYB83,CRY1,NAC075,NAC076,MYB46,NAC105,MYB58,KNAT7,MYB20
3_Member	GO Biological Processes	GO:1905177	tracheary element differentiation	-3.13436	-0.838055	5/19	826365,829044,829773,836359,836762	AT4G08160,NAC075,NAC076,NAC101,NAC105
3_Member	GO Biological Processes	GO:0044087	regulation of cellular component biogenesis	-2.73089	-0.634793	13/128	819289,819296,819997,826470,829044,829773,830557,831127,836762,837951,838219,842602,842938	GulLO6,CCA1,MYB83,CRY1,NAC075,NAC076,SPC98,MYB46,NAC105,AT1G02650,MYB58,KNAT7,MYB20
3_Member	GO Biological Processes	GO:1901348	positive regulation of secondary cell wall biogenesis	-2.35066	-0.406419	3/9	829773,831127,836762	NAC076,MYB46,NAC105
3_Member	GO Biological Processes	GO:1903340	positive regulation of cell wall organization or biogenesis	-2.35066	-0.406419	3/9	829773,831127,836762	NAC076,MYB46,NAC105
3_Member	GO Biological Processes	GO:0048759	xylem vessel member cell differentiation	-2.08344	-0.217192	3/11	829773,836359,836762	NAC076,NAC101,NAC105
4_Member	GO Biological Processes	GO:0031347	regulation of defense response	-4.26631	-1.53208	52/737	815863,816279,816346,816958,817084,817746,818403,820713,820792,822298,823911,823916,823989,823990,824329,824453,825139,826407,826470,827348,827910,828348,828877,829413,829589,830334,831037,831173,832234,832618,834178,834586,834836,835807,836134,836376,836514,836753,837302,837321,837674,838448,839126,839544,841622,841792,843373,843939,844099,844364,844423,5008138	SERK5,AT2G17705,HBI1,AT2G24240,AT2G25460,SOBIR1,AT2G38240,AT3G14840,AT3G15530,PAD3,AT3G47570,TCP14,CYP71A22,CYP71A21,AT3G51660,AT3G52870,HLECRK,MAPKKK9,CRY1,AT4G16500,AT4G02550,AT4G22530,AT4G27652,VTE1,XLG2,AT5G04550,AT5G11650,PBS3,AT5G21100,AT5G25440,AT5G41750,AT5G45500,CCR4,AT5G57035,TOE2,AT5G62560,AT5G63930,CPK28,AT1G07870,AT1G08050,AT1G11320,IBS1,AT1G25400,AT1G02660,LYK3,MAP3KA,PG2,AT1G76070,…
4_Member	GO Biological Processes	GO:0050832	defense response to fungus	-3.36788	-1.01104	47/704	814836,815863,816279,817084,818429,818533,819368,819556,822298,823990,824140,824453,825815,826860,827320,827663,828877,828919,829589,830281,830334,830454,830510,831037,831127,832660,832686,834069,834178,834586,834836,834842,835391,835789,835807,836150,837302,837321,838591,838912,839126,841622,842111,843111,843939,844423,5008138	MED8,SERK5,AT2G17705,AT2G25460,WRKY33,ABCB6,AT2G47550,AT3G04010,PAD3,CYP71A21,PSK4,AT3G52870,MED21,EARLI1,AT4G16260,CYP707A1,AT4G27652,UMAMIT33,XLG2,AT5G04020,AT5G04550,ATE1,TBL9,AT5G11650,MYB46,RLP52,WRKY50,AT5G40690,AT5G41750,AT5G45500,CCR4,RBOHD,AT5G53110,BGAL4,AT5G57035,AT5G60280,AT1G07870,AT1G08050,FNR2,AT1G23040,AT1G25400,LYK3,PGN,AT1G67850,AT1G76070,WRKY40,RTFL12
4_Member	GO Biological Processes	GO:1901698	response to nitrogen compound	-3.3604	-1.01104	48/724	814991,816928,816958,817084,817623,817923,818460,819296,820342,820792,821892,823861,823911,823994,824140,824453,826407,827088,828502,828771,828877,830281,830334,830982,831037,831498,832660,834044,834069,834178,834719,834836,835085,835807,837302,837321,837644,838481,838653,839126,842121,843316,843317,843373,843939,844099,844364,5008138	AT2G04500,AT2G23950,AT2G24240,AT2G25460,AT2G30720,LYK5,AT2G38780,CCA1,FLA18,AT3G15530,AT3G23160,AT3G47080,AT3G47570,BT2,PSK4,AT3G52870,MAPKKK9,IBR10,NLP7,WRKY20,AT4G27652,AT5G04020,AT5G04550,AT5G11140,AT5G11650,AAE5,RLP52,AT5G40460,AT5G40690,AT5G41750,MYC3,CCR4,WR3,AT5G57035,AT1G07870,AT1G08050,AT1G11020,AT1G19000,AT1G20640,AT1G25400,AT1G56660,AT1G69800,WRKY36,PG2,AT1G76070,AT1G77640,DGR1,RTFL12
4_Member	GO Biological Processes	GO:0010200	response to chitin	-2.88579	-0.72091	24/305	816958,817084,817923,820792,821892,823861,823911,824140,824453,828877,830281,830334,830982,831037,832660,834044,834178,834836,837302,839126,842121,843939,844099,5008138	AT2G24240,AT2G25460,LYK5,AT3G15530,AT3G23160,AT3G47080,AT3G47570,PSK4,AT3G52870,AT4G27652,AT5G04020,AT5G04550,AT5G11140,AT5G11650,RLP52,AT5G40460,AT5G41750,CCR4,AT1G07870,AT1G25400,AT1G56660,AT1G76070,AT1G77640,RTFL12
4_Member	GO Biological Processes	GO:0010243	response to organonitrogen compound	-2.78694	-0.659435	39/592	816928,816958,817084,817623,817923,818460,819296,820342,820792,821892,823861,823911,824140,824453,826407,827088,828771,828877,830281,830334,830982,831037,831498,832660,834044,834069,834178,834719,834836,835807,837302,837644,839126,842121,843373,843939,844099,844364,5008138	AT2G23950,AT2G24240,AT2G25460,AT2G30720,LYK5,AT2G38780,CCA1,FLA18,AT3G15530,AT3G23160,AT3G47080,AT3G47570,PSK4,AT3G52870,MAPKKK9,IBR10,WRKY20,AT4G27652,AT5G04020,AT5G04550,AT5G11140,AT5G11650,AAE5,RLP52,AT5G40460,AT5G40690,AT5G41750,MYC3,CCR4,AT5G57035,AT1G07870,AT1G11020,AT1G25400,AT1G56660,PG2,AT1G76070,AT1G77640,DGR1,RTFL12
5_Member	GO Biological Processes	GO:0071456	cellular response to hypoxia	-3.96775	-1.38309	23/241	816783,818701,819248,819365,821112,824140,826771,828856,831173,834244,834570,834842,835535,835587,837302,837886,838430,839180,841843,842922,843197,843216,5008138	UCP5,CAMBP25,WRKY46,ERF71,LBD41,PSK4,AT-HSFB2B,RMA3,PBS3,CML37,CYP707A3,RBOHD,BBX29,PDC2,AT1G07870,RAV1,AT1G18490,AT1G26380,AT1G54050,AT1G66080,AT1G68670,RAV2,RTFL12
5_Member	GO Biological Processes	GO:0036294	cellular response to decreased oxygen levels	-3.9138	-1.36165	23/243	816783,818701,819248,819365,821112,824140,826771,828856,831173,834244,834570,834842,835535,835587,837302,837886,838430,839180,841843,842922,843197,843216,5008138	UCP5,CAMBP25,WRKY46,ERF71,LBD41,PSK4,AT-HSFB2B,RMA3,PBS3,CML37,CYP707A3,RBOHD,BBX29,PDC2,AT1G07870,RAV1,AT1G18490,AT1G26380,AT1G54050,AT1G66080,AT1G68670,RAV2,RTFL12
5_Member	GO Biological Processes	GO:0071453	cellular response to oxygen levels	-3.8871	-1.36165	23/244	816783,818701,819248,819365,821112,824140,826771,828856,831173,834244,834570,834842,835535,835587,837302,837886,838430,839180,841843,842922,843197,843216,5008138	UCP5,CAMBP25,WRKY46,ERF71,LBD41,PSK4,AT-HSFB2B,RMA3,PBS3,CML37,CYP707A3,RBOHD,BBX29,PDC2,AT1G07870,RAV1,AT1G18490,AT1G26380,AT1G54050,AT1G66080,AT1G68670,RAV2,RTFL12
5_Member	GO Biological Processes	GO:0001666	response to hypoxia	-3.18371	-0.854129	26/325	816783,818701,819248,819365,821112,823908,824140,826771,828856,828891,831173,834244,834570,834842,835535,835587,835789,837302,837886,838430,839180,841843,842922,843197,843216,5008138	UCP5,CAMBP25,WRKY46,ERF71,LBD41,AT3G47540,PSK4,AT-HSFB2B,RMA3,ACBP2,PBS3,CML37,CYP707A3,RBOHD,BBX29,PDC2,BGAL4,AT1G07870,RAV1,AT1G18490,AT1G26380,AT1G54050,AT1G66080,AT1G68670,RAV2,RTFL12
5_Member	GO Biological Processes	GO:0036293	response to decreased oxygen levels	-3.02856	-0.767302	26/333	816783,818701,819248,819365,821112,823908,824140,826771,828856,828891,831173,834244,834570,834842,835535,835587,835789,837302,837886,838430,839180,841843,842922,843197,843216,5008138	UCP5,CAMBP25,WRKY46,ERF71,LBD41,AT3G47540,PSK4,AT-HSFB2B,RMA3,ACBP2,PBS3,CML37,CYP707A3,RBOHD,BBX29,PDC2,BGAL4,AT1G07870,RAV1,AT1G18490,AT1G26380,AT1G54050,AT1G66080,AT1G68670,RAV2,RTFL12
5_Member	GO Biological Processes	GO:0070482	response to oxygen levels	-2.99087	-0.752666	26/335	816783,818701,819248,819365,821112,823908,824140,826771,828856,828891,831173,834244,834570,834842,835535,835587,835789,837302,837886,838430,839180,841843,842922,843197,843216,5008138	UCP5,CAMBP25,WRKY46,ERF71,LBD41,AT3G47540,PSK4,AT-HSFB2B,RMA3,ACBP2,PBS3,CML37,CYP707A3,RBOHD,BBX29,PDC2,BGAL4,AT1G07870,RAV1,AT1G18490,AT1G26380,AT1G54050,AT1G66080,AT1G68670,RAV2,RTFL12
6_Member	GO Biological Processes	GO:0048827	phyllome development	-3.54078	-1.04166	49/730	814725,815176,815863,816194,816846,816928,817084,817438,818533,818820,818898,819309,820200,820317,820551,824112,824229,824706,824755,827123,827125,827297,827425,828657,828908,830360,830454,831648,831974,834044,834069,834345,835126,835238,835410,835789,836329,836544,836617,836742,837048,837321,837886,839901,840511,841899,842254,842873,843024	SGR5,GRF6,SERK5,AMS,PUB4,AT2G23950,AT2G25460,PLL4,ABCB6,SPL9,AT2G42960,CYP709B2,ROXY1,MYB65,OVA5,RDR6,DWF4,OVA1,AT3G55890,PPD1,AT4G14720,RR2,AT4G17150,SLK1,CRF4,AT5G04810,ATE1,MYB56,PUCHI,AT5G40460,AT5G40690,SPL2,SPL13A,YLS7,CRF3,BGAL4,SLK2,AT5G64230,CPR5,LARP1b,CVP2,AT1G08050,RAV1,TCP24,AT1G36070,PES1,BPEp,AS2,TRM22
6_Member	GO Biological Processes	GO:0048437	floral organ development	-2.40682	-0.425439	21/277	814725,816194,816846,816928,818820,820200,820317,820551,824112,824601,824706,825287,828657,831648,834345,835126,835724,836329,842254,842873,843024	SGR5,AMS,PUB4,AT2G23950,SPL9,ROXY1,MYB65,OVA5,RDR6,AP3,OVA1,HDG1,SLK1,MYB56,SPL2,SPL13A,HAP8,SLK2,BPEp,AS2,TRM22
6_Member	GO Biological Processes	GO:0048438	floral whorl development	-2.07441	-0.214077	17/223	816194,816846,816928,818820,820200,820317,820551,824112,824706,828657,831648,834345,835126,836329,842254,842873,843024	AMS,PUB4,AT2G23950,SPL9,ROXY1,MYB65,OVA5,RDR6,OVA1,SLK1,MYB56,SPL2,SPL13A,SLK2,BPEp,AS2,TRM22
7_Member	GO Biological Processes	GO:0006714	sesquiterpenoid metabolic process	-3.47875	-1.01454	7/34	819554,827663,834491,834570,837235,838224,843028	AT3G03990,CYP707A1,AT5G44630,CYP707A3,UGT71C5,ABA3,ABA4
7_Member	GO Biological Processes	GO:0009687	abscisic acid metabolic process	-2.92015	-0.734648	5/21	827663,834570,837235,838224,843028	CYP707A1,CYP707A3,UGT71C5,ABA3,ABA4
7_Member	GO Biological Processes	GO:0043288	apocarotenoid metabolic process	-2.92015	-0.734648	5/21	827663,834570,837235,838224,843028	CYP707A1,CYP707A3,UGT71C5,ABA3,ABA4
7_Member	GO Biological Processes	GO:1902644	tertiary alcohol metabolic process	-2.92015	-0.734648	5/21	827663,834570,837235,838224,843028	CYP707A1,CYP707A3,UGT71C5,ABA3,ABA4
7_Member	GO Biological Processes	GO:0016106	sesquiterpenoid biosynthetic process	-2.05517	-0.200661	4/21	819554,834491,838224,843028	AT3G03990,AT5G44630,ABA3,ABA4
8_Member	GO Biological Processes	GO:0009751	response to salicylic acid	-3.45908	-1.01454	33/435	815035,816258,816958,817084,819248,823620,823989,823990,823994,824140,824257,827348,828348,828877,830751,831173,831802,832069,834044,834069,834178,834586,834836,834904,835391,835807,837321,837674,838793,839126,843111,843373,844423	ZAP1,IRE1A,AT2G24240,AT2G25460,WRKY46,FAMT,CYP71A22,CYP71A21,BT2,PSK4,BCS1,AT4G16500,AT4G22530,AT4G27652,AT5G08520,PBS3,MYB3R-5,AT5G19490,AT5G40460,AT5G40690,AT5G41750,AT5G45500,CCR4,DIR1,AT5G53110,AT5G57035,AT1G08050,AT1G11320,DREB26,AT1G25400,AT1G67850,PG2,WRKY40
9_Member	GO Biological Processes	GO:0040008	regulation of growth	-3.44308	-1.01454	28/347	816928,818657,819014,820317,820907,820974,821892,824004,824193,825160,826470,827297,827350,830169,830334,830751,831091,831395,831412,831648,837817,839323,839721,839816,840104,842849,843970,3766807	AT2G23950,AT2G40620,ARL,MYB65,RALF23,RFC3,AT3G23160,AT3G48450,MAPKKK20,ARGOS,CRY1,RR2,RGF6,HB16,AT5G04550,AT5G08520,CPK17,AT5G15430,SP1L4,MYB56,DDF1,SPI,RALFL4,ML5,AT1G32120,CLV2,AT1G76380,LCR31
9_Member	GO Biological Processes	GO:0048638	regulation of developmental growth	-2.77397	-0.657182	21/258	816928,819014,820974,824004,824193,825160,826470,827297,827350,830751,831091,831395,831412,831648,837817,839323,839721,840104,842849,843970,3766807	AT2G23950,ARL,RFC3,AT3G48450,MAPKKK20,ARGOS,CRY1,RR2,RGF6,AT5G08520,CPK17,AT5G15430,SP1L4,MYB56,DDF1,SPI,RALFL4,AT1G32120,CLV2,AT1G76380,LCR31
10_Member	GO Biological Processes	GO:0035556	intracellular signal transduction	-3.12047	-0.838055	22/259	817680,820907,820929,821339,822108,825146,827297,827576,828877,829059,831393,833552,834842,837048,837421,839721,840957,842992,843060,843708,5008017,5008138	ERF15,RALF23,EBP,LST8-1,RALFL25,SAC9,RR2,AT4G18450,AT4G27652,VPS15,DND1,HK2,RBOHD,CVP2,NP1,RALFL4,VIP1,SGA2,AT1G67400,EIL3,AT3G21295,RTFL12
10_Member	GO Biological Processes	GO:0071369	cellular response to ethylene stimulus	-2.30041	-0.390388	10/96	817680,820929,825160,827297,827576,828877,829335,843060,843708,5008138	ERF15,EBP,ARGOS,RR2,AT4G18450,AT4G27652,KNAT5,AT1G67400,EIL3,RTFL12
11_Member	GO Biological Processes	GO:0051606	detection of stimulus	-3.01975	-0.767302	9/64	814725,814823,821781,826470,829335,831173,835039,838430,840038	SGR5,PKS1,FHY3,CRY1,KNAT5,PBS3,AT5G49760,AT1G18490,SGR2
11_Member	GO Biological Processes	GO:0009581	detection of external stimulus	-2.2687	-0.371644	5/29	814725,814823,821781,826470,840038	SGR5,PKS1,FHY3,CRY1,SGR2
11_Member	GO Biological Processes	GO:0009582	detection of abiotic stimulus	-2.2687	-0.371644	5/29	814725,814823,821781,826470,840038	SGR5,PKS1,FHY3,CRY1,SGR2
12_Member	GO Biological Processes	GO:0045927	positive regulation of growth	-2.96307	-0.738654	7/41	819014,821892,825160,830334,830751,839323,839816	ARL,AT3G23160,ARGOS,AT5G04550,AT5G08520,SPI,ML5
12_Member	GO Biological Processes	GO:0048639	positive regulation of developmental growth	-2.73528	-0.634793	4/14	819014,825160,830751,839323	ARL,ARGOS,AT5G08520,SPI
13_Member	GO Biological Processes	GO:0006778	porphyrin-containing compound metabolic process	-2.88027	-0.72091	19/219	817196,818633,819085,820115,821520,824034,824329,824345,826719,828720,829413,831272,834069,834408,834976,836338,838417,842700,844024	HO2,AT2G40400,AT2G44760,AT3G09580,NTMC2T5.2,GSA2,AT3G51660,G4,AT4G11175,BGAL12,VTE1,HEMG2,AT5G40690,CLH2,AT5G49170,TRM25,AT1G18360,ISPF,GT2
13_Member	GO Biological Processes	GO:0033014	tetrapyrrole biosynthetic process	-2.64927	-0.604007	10/86	817196,818633,819085,820115,821520,824034,824345,831272,836338,842700	HO2,AT2G40400,AT2G44760,AT3G09580,NTMC2T5.2,GSA2,G4,HEMG2,TRM25,ISPF
13_Member	GO Biological Processes	GO:0015995	chlorophyll biosynthetic process	-2.54601	-0.524006	8/61	818633,819085,821520,824034,824345,831272,836338,842700	AT2G40400,AT2G44760,NTMC2T5.2,GSA2,G4,HEMG2,TRM25,ISPF
13_Member	GO Biological Processes	GO:0006779	porphyrin-containing compound biosynthetic process	-2.52965	-0.517548	9/75	818633,819085,820115,821520,824034,824345,831272,836338,842700	AT2G40400,AT2G44760,AT3G09580,NTMC2T5.2,GSA2,G4,HEMG2,TRM25,ISPF
14_Member	GO Biological Processes	GO:0005976	polysaccharide metabolic process	-2.8707	-0.72091	32/452	816699,816821,818076,819368,819646,820651,821127,822422,822556,823949,824083,826365,828067,828990,830090,830368,831618,831716,832209,832850,833302,834418,835558,836343,836359,836858,837716,838001,839224,842035,842651,6241352	PE11,AT2G22900,ARAD1,AT2G47550,AT3G04860,PME3,LSF1,AT3G27980,PME31,AT3G47940,AT3G49220,AT4G08160,AT4G02320,AT4G28706,CESA2,AT5G04885,RCP1,TBL35,AT5G20860,AT5G27870,XGD1,AT5G43950,GAUT12,GT18,NAC101,IRX14-L,SS3,AT1G14390,GALT1,CSLE1,RHS8,AT2G41451
14_Member	GO Biological Processes	GO:0000272	polysaccharide catabolic process	-2.39019	-0.416497	12/124	816699,819368,820651,821127,822422,822556,824083,826365,828067,831618,832209,832850	PE11,AT2G47550,PME3,LSF1,AT3G27980,PME31,AT3G49220,AT4G08160,AT4G02320,RCP1,AT5G20860,AT5G27870
15_Member	GO Biological Processes	GO:0071396	cellular response to lipid	-2.7112	-0.629461	35/520	817084,817623,818255,818533,819014,819554,820317,821520,823994,824131,824193,824229,827152,827928,828682,830708,830883,831648,832686,833552,834044,836617,836854,838072,838377,838470,839277,839345,839580,841395,841537,841622,843876,843939,843970	AT2G25460,AT2G30720,GAMMA-TIP,ABCB6,ARL,AT3G03990,MYB65,NTMC2T5.2,BT2,MYB84,MAPKKK20,DWF4,AO1,AT4G03420,AT4G25770,BIM1,AT5G10190,MYB56,WRKY50,HK2,AT5G40460,CPR5,DEAR2,LPP2,AT1G17970,CDPK1,ABCC5,EFE,NAC001,ABF1,FBH3,LYK3,AT1G75400,AT1G76070,AT1G76380
15_Member	GO Biological Processes	GO:0070542	response to fatty acid	-2.51008	-0.517548	39/614	817084,817623,819308,819556,820929,821520,823620,823861,823994,824004,824229,824329,827152,827928,828348,828682,829873,830334,830592,831037,831426,831784,832686,834044,834114,834164,834584,834719,834990,836617,837321,838793,839126,839345,841944,843939,843970,844352,5008138	AT2G25460,AT2G30720,AT2G46940,AT3G04010,EBP,NTMC2T5.2,FAMT,AT3G47080,BT2,AT3G48450,DWF4,AT3G51660,AO1,AT4G03420,AT4G22530,AT4G25770,AT4G37190,AT5G04550,ST2A,AT5G11650,AT5G02940,AT5G02230,WRKY50,AT5G40460,AT5G41120,AT5G41620,AT5G45480,MYC3,GATA16,CPR5,AT1G08050,DREB26,AT1G25400,EFE,LOX1,AT1G76070,AT1G76380,AT1G80120,RTFL12
15_Member	GO Biological Processes	GO:0009753	response to jasmonic acid	-2.32151	-0.390388	38/610	817084,817623,819308,819556,820929,821520,823620,823861,823994,824004,824229,824329,827152,827928,828348,828682,829873,830334,830592,831037,831426,831784,832686,834044,834114,834164,834584,834719,834990,836617,837321,838793,839126,841944,843939,843970,844352,5008138	AT2G25460,AT2G30720,AT2G46940,AT3G04010,EBP,NTMC2T5.2,FAMT,AT3G47080,BT2,AT3G48450,DWF4,AT3G51660,AO1,AT4G03420,AT4G22530,AT4G25770,AT4G37190,AT5G04550,ST2A,AT5G11650,AT5G02940,AT5G02230,WRKY50,AT5G40460,AT5G41120,AT5G41620,AT5G45480,MYC3,GATA16,CPR5,AT1G08050,DREB26,AT1G25400,LOX1,AT1G76070,AT1G76380,AT1G80120,RTFL12
15_Member	GO Biological Processes	GO:0071398	cellular response to fatty acid	-2.02516	-0.176403	13/155	817084,817623,821520,824229,827152,827928,828682,832686,834044,836617,839345,843939,843970	AT2G25460,AT2G30720,NTMC2T5.2,DWF4,AO1,AT4G03420,AT4G25770,WRKY50,AT5G40460,CPR5,EFE,AT1G76070,AT1G76380
16_Member	GO Biological Processes	GO:1902347	response to strigolactone	-2.70477	-0.629461	3/7	819554,826470,837231	AT3G03990,CRY1,AT1G07200
17_Member	GO Biological Processes	GO:0009651	response to salt stress	-2.69627	-0.629461	39/599	816622,816958,817623,818429,818665,818701,819556,820264,821904,823994,824193,824727,826860,828877,830334,830751,831037,831498,832234,833552,833873,834178,834471,835652,836011,836866,836881,837529,837817,838207,838224,838952,839277,839323,840037,842111,843262,843939,5008138	ERF53,AT2G24240,AT2G30720,WRKY33,AT2G40700,CAMBP25,AT3G04010,AT3G10930,MYB15,BT2,MAPKKK20,P5CS2,EARLI1,AT4G27652,AT5G04550,AT5G08520,AT5G11650,AAE5,AT5G21100,HK2,AT5G38820,AT5G41750,AT5G44440,AT5G55580,CRCK1,CYP81G1,ZF1,RAS1,DDF1,OCT6,ABA3,AT1G23440,ABCC5,SPI,NFD4,PGN,WRKY57,AT1G76070,RTFL12
18_Member	GO Biological Processes	GO:1902930	regulation of alcohol biosynthetic process	-2.64338	-0.604007	5/24	821339,822475,830751,840510,841899	LST8-1,CLE25,AT5G08520,AT1G36060,PES1
18_Member	GO Biological Processes	GO:0010116	positive regulation of abscisic acid biosynthetic process	-2.51372	-0.517548	3/8	822475,830751,840510	CLE25,AT5G08520,AT1G36060
18_Member	GO Biological Processes	GO:0019747	regulation of isoprenoid metabolic process	-2.37372	-0.414997	6/39	822475,827017,830751,837817,840510,841899	CLE25,J20,AT5G08520,DDF1,AT1G36060,PES1
18_Member	GO Biological Processes	GO:1902932	positive regulation of alcohol biosynthetic process	-2.20876	-0.324292	3/10	822475,830751,840510	CLE25,AT5G08520,AT1G36060
19_Member	GO Biological Processes	GO:0043068	positive regulation of programmed cell death	-2.64338	-0.604007	5/24	820317,829589,831173,836359,841202	MYB65,XLG2,PBS3,NAC101,ATE2F2
19_Member	GO Biological Processes	GO:0010942	positive regulation of cell death	-2.37372	-0.414997	6/39	817746,820317,829589,831173,836359,841202	SOBIR1,MYB65,XLG2,PBS3,NAC101,ATE2F2
20_Member	GO Biological Processes	GO:0046777	protein autophosphorylation	-2.50675	-0.517548	12/120	815863,816258,824193,825139,826470,831091,832618,835039,836150,837421,838470,843389	SERK5,IRE1A,MAPKKK20,HLECRK,CRY1,CPK17,AT5G25440,AT5G49760,AT5G60280,NP1,CDPK1,CRK2

## Sheet: 3hpc Functional enrichment
GroupID	Category	Term	Description	LogP	Log(q-value)	InTerm_InList	Genes	Symbols
1_Summary	GO Biological Processes	GO:0031328	positive regulation of cellular biosynthetic process	-6.06777	-2.75046	17/444	818843,819280,819562,822714,824205,828144,828556,828661,829956,830497,831697,831919,832190,832538,833957,836414,843568,843107,843419	LBD16,HB-7,NAC047,MYB121,OBP1,NAC069,AGL24,LAF1,DOF4.7,MYB33,LAC10,JKD,AT5G20670,LSU2,NAC6,HCA2,ERF73,SUFE2,AT1G70820
2_Summary	GO Biological Processes	GO:0015979	photosynthesis	-3.65712	-1.06888	8/174	821137,821143,823814,835615,835806,837178,840098,843099	CYP38,PnsL3,AT3G46610,AT5G55220,LUT2,PSBP-1,PRK,PSBY
3_Summary	GO Biological Processes	GO:0006820	anion transport	-3.65232	-1.06888	9/221	817266,821270,830545,830882,831308,834652,834806,837364,838861,817460,821671,824539,831339	AT2G27240,WRKY45,AT5G06570,SULTR2;1,NRT2.7,APE2,TDT,AT1G08440,AT1G22550,GLR2.7,ACA9,CHX20,CNGC18
4_Summary	GO Biological Processes	GO:0015743	malate transport	-3.31848	-0.793027	3/17	817266,834806,837364,834652	AT2G27240,TDT,AT1G08440,APE2
5_Summary	GO Biological Processes	GO:0016144	S-glycoside biosynthetic process	-3.22094	-0.77012	4/42	824807,832365,832366,838438,820053,821333,824905,826148,827388,828924,831697,833901,835274,836001,842267,844109	WRKY70,MAM1,IMS2,MYB51,AT3G09010,BGLU44,AT3G57380,RAP2.9,PLA-I{beta]2,AT4G28085,LAC10,AT5G39090,CBF4,AT5G58840,AT1G59740,AT1G77730
6_Summary	GO Biological Processes	GO:0071215	cellular response to abscisic acid stimulus	-2.85975	-0.491906	8/230	818609,819280,819559,824905,828905,831156,839444,842978,824807,825220,830497	PP2C5,HB-7,AT3G04040,AT3G57380,PYL10,SAG29,MAN1,ABO3,WRKY70,AT3G60490,MYB33
7_Summary	GO Biological Processes	GO:0042548	regulation of photosynthesis, light reaction	-2.66808	-0.353485	3/28	821137,843099,843222	CYP38,PSBY,PHYLLO
8_Summary	KEGG Pathway	ath00906	Carotenoid biosynthesis - Arabidopsis thaliana (thale cress)	-2.6236	-0.341186	3/29	824479,827562,835806,828022,828726	LUT1,NCED2,LUT2,ANL2,ACS7
9_Summary	GO Biological Processes	GO:0042762	regulation of sulfur metabolic process	-2.46124	-0.250188	3/33	819562,834943,843107	NAC047,ATSDI1,SUFE2
10_Summary	GO Biological Processes	GO:0048508	embryonic meristem development	-2.42406	-0.238559	3/34	822075,835478,836414	CLE41,CUC2,HCA2
11_Summary	GO Biological Processes	GO:0010942	positive regulation of cell death	-2.25481	-0.0934393	3/39	819090,830497,833957	DAD1,MYB33,NAC6
12_Summary	GO Biological Processes	GO:0019725	cellular homeostasis	-2.22364	-0.0738513	6/176	817460,821260,824539,831339,834806,843099	GLR2.7,TRXF1,CHX20,CNGC18,TDT,PSBY
13_Summary	GO Biological Processes	GO:0002833	positive regulation of response to biotic stimulus	-2.09693	0	4/85	824807,830142,833957,837210	WRKY70,AT4G39830,NAC6,EXO70B2
14_Summary	GO Biological Processes	GO:0002229	defense response to oomycetes	-2.05489	0	3/46	824807,832538,834217	WRKY70,LSU2,AT5G42120
1_Member	GO Biological Processes	GO:0031328	positive regulation of cellular biosynthetic process	-6.06777	-2.75046	17/444	818843,819280,819562,822714,824205,828144,828556,828661,829956,830497,831697,831919,832190,832538,833957,836414,843568	LBD16,HB-7,NAC047,MYB121,OBP1,NAC069,AGL24,LAF1,DOF4.7,MYB33,LAC10,JKD,AT5G20670,LSU2,NAC6,HCA2,ERF73
1_Member	GO Biological Processes	GO:0045893	positive regulation of DNA-templated transcription	-5.81805	-2.75046	15/363	818843,819280,822714,824205,828144,828556,828661,829956,830497,831919,832190,832538,833957,836414,843568	LBD16,HB-7,MYB121,OBP1,NAC069,AGL24,LAF1,DOF4.7,MYB33,JKD,AT5G20670,LSU2,NAC6,HCA2,ERF73
1_Member	GO Biological Processes	GO:1902680	positive regulation of RNA biosynthetic process	-5.78852	-2.75046	15/365	818843,819280,822714,824205,828144,828556,828661,829956,830497,831919,832190,832538,833957,836414,843568	LBD16,HB-7,MYB121,OBP1,NAC069,AGL24,LAF1,DOF4.7,MYB33,JKD,AT5G20670,LSU2,NAC6,HCA2,ERF73
1_Member	GO Biological Processes	GO:1903508	positive regulation of nucleic acid-templated transcription	-5.78852	-2.75046	15/365	818843,819280,822714,824205,828144,828556,828661,829956,830497,831919,832190,832538,833957,836414,843568	LBD16,HB-7,MYB121,OBP1,NAC069,AGL24,LAF1,DOF4.7,MYB33,JKD,AT5G20670,LSU2,NAC6,HCA2,ERF73
1_Member	GO Biological Processes	GO:0009891	positive regulation of biosynthetic process	-5.78106	-2.75046	17/466	818843,819280,819562,822714,824205,828144,828556,828661,829956,830497,831697,831919,832190,832538,833957,836414,843568	LBD16,HB-7,NAC047,MYB121,OBP1,NAC069,AGL24,LAF1,DOF4.7,MYB33,LAC10,JKD,AT5G20670,LSU2,NAC6,HCA2,ERF73
1_Member	GO Biological Processes	GO:0045935	positive regulation of nucleobase-containing compound metabolic process	-5.60566	-2.65424	16/428	818843,819280,822714,824205,828144,828556,828661,829956,830497,831697,831919,832190,832538,833957,836414,843568	LBD16,HB-7,MYB121,OBP1,NAC069,AGL24,LAF1,DOF4.7,MYB33,LAC10,JKD,AT5G20670,LSU2,NAC6,HCA2,ERF73
1_Member	GO Biological Processes	GO:0010557	positive regulation of macromolecule biosynthetic process	-5.53172	-2.64725	15/383	818843,819280,822714,824205,828144,828556,828661,829956,830497,831919,832190,832538,833957,836414,843568	LBD16,HB-7,MYB121,OBP1,NAC069,AGL24,LAF1,DOF4.7,MYB33,JKD,AT5G20670,LSU2,NAC6,HCA2,ERF73
1_Member	GO Biological Processes	GO:0051254	positive regulation of RNA metabolic process	-5.38224	-2.55576	15/394	818843,819280,822714,824205,828144,828556,828661,829956,830497,831919,832190,832538,833957,836414,843568	LBD16,HB-7,MYB121,OBP1,NAC069,AGL24,LAF1,DOF4.7,MYB33,JKD,AT5G20670,LSU2,NAC6,HCA2,ERF73
1_Member	GO Biological Processes	GO:0031325	positive regulation of cellular metabolic process	-5.03	-2.28786	18/588	818843,819280,819562,822714,824205,828144,828556,828661,829956,830497,831697,831919,832190,832538,833957,836414,843107,843568	LBD16,HB-7,NAC047,MYB121,OBP1,NAC069,AGL24,LAF1,DOF4.7,MYB33,LAC10,JKD,AT5G20670,LSU2,NAC6,HCA2,SUFE2,ERF73
1_Member	GO Biological Processes	GO:0051173	positive regulation of nitrogen compound metabolic process	-5.01743	-2.28786	17/532	818843,819280,819562,822714,824205,828144,828556,828661,829956,830497,831697,831919,832190,832538,833957,836414,843568	LBD16,HB-7,NAC047,MYB121,OBP1,NAC069,AGL24,LAF1,DOF4.7,MYB33,LAC10,JKD,AT5G20670,LSU2,NAC6,HCA2,ERF73
1_Member	GO Biological Processes	GO:0010604	positive regulation of macromolecule metabolic process	-4.64285	-1.95468	17/569	818843,819280,822714,824205,828144,828556,828661,829956,830497,831697,831919,832190,832538,833957,836414,843419,843568	LBD16,HB-7,MYB121,OBP1,NAC069,AGL24,LAF1,DOF4.7,MYB33,LAC10,JKD,AT5G20670,LSU2,NAC6,HCA2,AT1G70820,ERF73
1_Member	GO Biological Processes	GO:0009893	positive regulation of metabolic process	-4.51196	-1.86158	19/705	818843,819280,819562,822714,824205,828144,828556,828661,829956,830497,831697,831919,832190,832538,833957,836414,843107,843419,843568	LBD16,HB-7,NAC047,MYB121,OBP1,NAC069,AGL24,LAF1,DOF4.7,MYB33,LAC10,JKD,AT5G20670,LSU2,NAC6,HCA2,SUFE2,AT1G70820,ERF73
2_Member	GO Biological Processes	GO:0015979	photosynthesis	-3.65712	-1.06888	8/174	821137,821143,823814,835615,835806,837178,840098,843099	CYP38,PnsL3,AT3G46610,AT5G55220,LUT2,PSBP-1,PRK,PSBY
2_Member	GO Biological Processes	GO:0019684	photosynthesis, light reaction	-2.3963	-0.223037	5/113	821137,821143,823814,835806,837178	CYP38,PnsL3,AT3G46610,LUT2,PSBP-1
3_Member	GO Biological Processes	GO:0006820	anion transport	-3.65232	-1.06888	9/221	817266,821270,830545,830882,831308,834652,834806,837364,838861	AT2G27240,WRKY45,AT5G06570,SULTR2;1,NRT2.7,APE2,TDT,AT1G08440,AT1G22550
3_Member	GO Biological Processes	GO:0006811	ion transport	-3.49118	-0.937702	13/454	817266,817460,821270,821671,824539,830545,830882,831308,831339,834652,834806,837364,838861	AT2G27240,GLR2.7,WRKY45,ACA9,CHX20,AT5G06570,SULTR2;1,NRT2.7,CNGC18,APE2,TDT,AT1G08440,AT1G22550
3_Member	GO Biological Processes	GO:0015698	inorganic anion transport	-2.60633	-0.339159	5/101	821270,830545,830882,831308,838861	WRKY45,AT5G06570,SULTR2;1,NRT2.7,AT1G22550
3_Member	GO Biological Processes	GO:0098661	inorganic anion transmembrane transport	-2.13605	0	3/43	830882,831308,838861	SULTR2;1,NRT2.7,AT1G22550
4_Member	GO Biological Processes	GO:0015743	malate transport	-3.31848	-0.793027	3/17	817266,834806,837364	AT2G27240,TDT,AT1G08440
4_Member	GO Biological Processes	GO:0015740	C4-dicarboxylate transport	-3.17057	-0.742032	3/19	817266,834806,837364	AT2G27240,TDT,AT1G08440
4_Member	GO Biological Processes	GO:0006835	dicarboxylic acid transport	-2.81287	-0.463507	3/25	817266,834806,837364	AT2G27240,TDT,AT1G08440
4_Member	GO Biological Processes	GO:0046942	carboxylic acid transport	-2.46316	-0.250188	4/67	817266,834652,834806,837364	AT2G27240,APE2,TDT,AT1G08440
5_Member	GO Biological Processes	GO:0016144	S-glycoside biosynthetic process	-3.22094	-0.77012	4/42	824807,832365,832366,838438	WRKY70,MAM1,IMS2,MYB51
5_Member	GO Biological Processes	GO:0019758	glycosinolate biosynthetic process	-3.22094	-0.77012	4/42	824807,832365,832366,838438	WRKY70,MAM1,IMS2,MYB51
5_Member	GO Biological Processes	GO:0019761	glucosinolate biosynthetic process	-3.22094	-0.77012	4/42	824807,832365,832366,838438	WRKY70,MAM1,IMS2,MYB51
5_Member	GO Biological Processes	GO:1901659	glycosyl compound biosynthetic process	-3.03418	-0.626825	4/47	824807,832365,832366,838438	WRKY70,MAM1,IMS2,MYB51
5_Member	GO Biological Processes	GO:0019748	secondary metabolic process	-2.67461	-0.353485	16/768	820053,821333,824807,824905,826148,827388,828924,831697,832365,832366,833901,835274,836001,838438,842267,844109	AT3G09010,BGLU44,WRKY70,AT3G57380,RAP2.9,PLA-I{beta]2,AT4G28085,LAC10,MAM1,IMS2,AT5G39090,CBF4,AT5G58840,MYB51,AT1G59740,AT1G77730
5_Member	GO Biological Processes	GO:1901657	glycosyl compound metabolic process	-2.63317	-0.341186	8/250	820053,821333,824807,832365,832366,835274,838438,842267	AT3G09010,BGLU44,WRKY70,MAM1,IMS2,CBF4,MYB51,AT1G59740
5_Member	GO Biological Processes	GO:0009625	response to insect	-2.46124	-0.250188	3/33	824807,832365,838438	WRKY70,MAM1,MYB51
6_Member	GO Biological Processes	GO:0071215	cellular response to abscisic acid stimulus	-2.85975	-0.491906	8/230	818609,819280,819559,824905,828905,831156,839444,842978	PP2C5,HB-7,AT3G04040,AT3G57380,PYL10,SAG29,MAN1,ABO3
6_Member	GO Biological Processes	GO:0097306	cellular response to alcohol	-2.85975	-0.491906	8/230	818609,819280,819559,824905,828905,831156,839444,842978	PP2C5,HB-7,AT3G04040,AT3G57380,PYL10,SAG29,MAN1,ABO3
6_Member	GO Biological Processes	GO:0009738	abscisic acid-activated signaling pathway	-2.43681	-0.238722	6/159	818609,819280,819559,828905,839444,842978	PP2C5,HB-7,AT3G04040,PYL10,MAN1,ABO3
6_Member	GO Biological Processes	GO:0071396	cellular response to lipid	-2.0358	0	11/520	818609,819280,819559,824807,824905,825220,828905,830497,831156,839444,842978	PP2C5,HB-7,AT3G04040,WRKY70,AT3G57380,AT3G60490,PYL10,MYB33,SAG29,MAN1,ABO3
7_Member	GO Biological Processes	GO:0042548	regulation of photosynthesis, light reaction	-2.66808	-0.353485	3/28	821137,843099,843222	CYP38,PSBY,PHYLLO
7_Member	GO Biological Processes	GO:0043467	regulation of generation of precursor metabolites and energy	-2.53951	-0.287066	3/31	821137,843099,843222	CYP38,PSBY,PHYLLO
7_Member	GO Biological Processes	GO:0010109	regulation of photosynthesis	-2.02917	0	3/47	821137,843099,843222	CYP38,PSBY,PHYLLO
8_Member	KEGG Pathway	ath00906	Carotenoid biosynthesis - Arabidopsis thaliana (thale cress)	-2.6236	-0.341186	3/29	824479,827562,835806	LUT1,NCED2,LUT2
8_Member	GO Biological Processes	GO:0120251	hydrocarbon biosynthetic process	-2.10831	0	3/44	828022,828726,835806	ANL2,ACS7,LUT2
9_Member	GO Biological Processes	GO:0042762	regulation of sulfur metabolic process	-2.46124	-0.250188	3/33	819562,834943,843107	NAC047,ATSDI1,SUFE2
10_Member	GO Biological Processes	GO:0048508	embryonic meristem development	-2.42406	-0.238559	3/34	822075,835478,836414	CLE41,CUC2,HCA2
11_Member	GO Biological Processes	GO:0010942	positive regulation of cell death	-2.25481	-0.0934393	3/39	819090,830497,833957	DAD1,MYB33,NAC6
12_Member	GO Biological Processes	GO:0019725	cellular homeostasis	-2.22364	-0.0738513	6/176	817460,821260,824539,831339,834806,843099	GLR2.7,TRXF1,CHX20,CNGC18,TDT,PSBY
13_Member	GO Biological Processes	GO:0002833	positive regulation of response to biotic stimulus	-2.09693	0	4/85	824807,830142,833957,837210	WRKY70,AT4G39830,NAC6,EXO70B2
13_Member	GO Biological Processes	GO:0032103	positive regulation of response to external stimulus	-2.02795	0	4/89	824807,830142,833957,837210	WRKY70,AT4G39830,NAC6,EXO70B2
14_Member	GO Biological Processes	GO:0002229	defense response to oomycetes	-2.05489	0	3/46	824807,832538,834217	WRKY70,LSU2,AT5G42120

## Sheet: Uncut and 3phc Func. enrichment
GroupID	Category	Term	Description	LogP	Log(q-value)	InTerm_InList	Genes	Symbols
1_Summary	GO Biological Processes	GO:0009908	flower development	-2.208	0	3/491	816353,819174,821113	GATA20,AGL20,MYB57
1_Member	GO Biological Processes	GO:0009908	flower development	-2.208	0	3/491	816353,819174,821113	GATA20,AGL20,MYB57
1_Member	GO Biological Processes	GO:0090567	reproductive shoot system development	-2.13226	0	3/523	816353,819174,821113	GATA20,AGL20,MYB57
