# Supplementary material for: Integrated Systems Biology Pipeline to Compare Co-Expression Networks in Plants and Elucidate Differential Regulators
Source: Plants (Basel). 2023 Oct 19;12(20):3618. doi: 10.3390/plants12203618 (PMC10610404; doi:10.3390/plants12203618)
Supplement: Supplementary file 1 [file plants-12-03618-s001.zip › S_Table S2.XLSX]

## Sheet: Supplementary Table 2
Supplementary Table S2: Co-expression-GRN network
SI	Sheet	Description
1	Shoot Control Drought CERN	Co-expression-GRN overlap network table.
2	Shoot Control Salt CERN	Co-expression-GRN overlap network table.
3	Shoot Drought Salft CERN	Co-expression-GRN overlap network table.
4	Root Control Drought CERN	Co-expression-GRN overlap network table.
5	Root Control Salt CERN	Co-expression-GRN overlap network table.
6	Root Drought salt CERN	Co-expression-GRN overlap network table.
	*Co-Expressed-Regulatory Network (CERN)

## Sheet: Shoot Control Drought CERN
color	name	Net	TF
#FFD602	AT3G50700	Control and Drought	TF
#FFD602	AT5G03050	Control and Drought	NON_TF
#FFD602	AT1G08980	Control and Drought	NON_TF
#FFD602	AT2G15970	Control and Drought	NON_TF
#FFD602	AT1G06460	Control and Drought	NON_TF
#FFD602	AT5G17190	Control and Drought	NON_TF
#FFD602	AT5G37780	Control and Drought	NON_TF
#FFD602	AT4G14270	Control and Drought	NON_TF
#FFD602	AT4G04340	Control and Drought	NON_TF
#1E6B52	AT5G19540	Control	NON_TF
#FFD602	AT5G55230	Control and Drought	NON_TF
#1E6B52	AT3G50210	Control	NON_TF
#1E6B52	AT3G47550	Control	NON_TF
#FFD602	AT4G02370	Control and Drought	NON_TF
#FFD602	AT5G11580	Control and Drought	NON_TF
#FFD602	AT3G55260	Control and Drought	NON_TF
#FFD602	AT5G61530	Control and Drought	NON_TF
#1E6B52	AT3G46440	Control	NON_TF
#1E6B52	AT1G75140	Control	NON_TF
#FFD602	AT1G66410	Control and Drought	NON_TF
#A69363	AT3G22200	Drought	NON_TF
#FFD602	AT2G28900	Control and Drought	NON_TF
#A69363	AT3G47860	Drought	NON_TF
#FFD602	AT4G17140	Control and Drought	NON_TF
#A69363	AT2G22980	Drought	NON_TF
#FFD602	AT2G36390	Control and Drought	NON_TF
#A69363	AT3G52070	Drought	NON_TF
#A69363	AT2G29960	Drought	NON_TF
#A69363	AT4G11360	Drought	NON_TF
#FFD602	AT2G21380	Control and Drought	NON_TF
#A69363	AT5G62360	Drought	NON_TF
#1E6B52	AT1G25560	Control	TF
#FFD602	AT1G73500	Control and Drought	NON_TF
#1E6B52	AT2G25090	Control	NON_TF
#FFD602	AT2G32030	Control and Drought	TF
#1E6B52	AT1G15670	Control	NON_TF
#1E6B52	AT1G72920	Control	NON_TF
#FFD602	AT5G61600	Control and Drought	TF
#FFD602	AT4G31800	Control and Drought	TF
#FFD602	AT1G59910	Control and Drought	NON_TF
#1E6B52	AT4G28085	Control	NON_TF
#FFD602	AT1G09070	Control and Drought	NON_TF
#FFD602	AT2G40180	Control and Drought	NON_TF
#A69363	AT2G30250	Drought	TF
#A69363	AT1G07720	Drought	NON_TF
#A69363	AT2G38360	Drought	NON_TF
#A69363	AT4G39830	Drought	NON_TF
#A69363	AT2G25460	Drought	NON_TF
#A69363	AT5G05300	Drought	NON_TF
#A69363	AT1G71697	Drought	NON_TF
#A69363	AT2G40230	Drought	NON_TF
#A69363	AT5G24030	Drought	NON_TF
#A69363	AT3G16860	Drought	NON_TF
#A69363	AT4G35110	Drought	NON_TF
#A69363	AT5G25930	Drought	NON_TF
#A69363	AT5G01540	Drought	NON_TF
#A69363	AT4G34390	Drought	NON_TF
#A69363	AT5G25440	Drought	NON_TF
#FFD602	AT1G24140	Control and Drought	NON_TF
#A69363	AT4G21390	Drought	NON_TF
#FFD602	AT3G50060	Control and Drought	TF
#FFD602	AT3G02140	Control and Drought	NON_TF
#FFD602	AT5G04720	Control and Drought	NON_TF
#FFD602	AT2G40000	Control and Drought	NON_TF
#1E6B52	AT5G04190	Control	NON_TF
#FFD602	AT3G46600	Control and Drought	TF
#1E6B52	AT5G52250	Control	NON_TF
#1E6B52	AT5G15330	Control	NON_TF
#1E6B52	AT2G23290	Control	TF
#1E6B52	AT4G20820	Control	NON_TF
#1E6B52	AT2G27500	Control	NON_TF
#FFD602	AT4G17490	Control and Drought	TF
#1E6B52	AT4G33940	Control	NON_TF
#1E6B52	AT5G43190	Control	NON_TF
#FFD602	AT1G11050	Control and Drought	NON_TF
#FFD602	AT1G48320	Control and Drought	NON_TF
#1E6B52	AT1G51950	Control	TF
#1E6B52	AT2G18700	Control	NON_TF
#FFD602	AT1G49780	Control and Drought	NON_TF
#FFD602	AT1G22190	Control and Drought	TF
#1E6B52	AT1G75490	Control	TF
#FFD602	AT1G66160	Control and Drought	NON_TF
#1E6B52	AT3G51970	Control	NON_TF
#1E6B52	AT1G04770	Control	NON_TF
#1E6B52	AT1G76890	Control	TF
#FFD602	AT2G41010	Control and Drought	NON_TF
#FFD602	AT1G25550	Control and Drought	TF
#1E6B52	AT3G57450	Control	NON_TF
#FFD602	AT4G32030	Control and Drought	NON_TF
#FFD602	AT5G37770	Control and Drought	NON_TF
#FFD602	AT5G06320	Control and Drought	NON_TF
#1E6B52	AT5G19120	Control	NON_TF
#FFD602	AT2G27080	Control and Drought	NON_TF
#FFD602	AT1G49840	Control and Drought	NON_TF
#1E6B52	AT3G49940	Control	TF
#1E6B52	AT1G16170	Control	NON_TF
#FFD602	AT5G62470	Control and Drought	TF
#1E6B52	AT4G03110	Control	NON_TF
#1E6B52	AT1G66180	Control	NON_TF
#1E6B52	AT1G27100	Control	NON_TF
#FFD602	AT3G56880	Control and Drought	NON_TF
#FFD602	AT1G66090	Control and Drought	NON_TF
#1E6B52	AT4G18340	Control	NON_TF
#FFD602	AT1G02660	Control and Drought	NON_TF
#1E6B52	AT4G37240	Control	NON_TF
#1E6B52	AT1G75020	Control	NON_TF
#FFD602	AT3G55980	Control and Drought	TF
#1E6B52	AT4G36030	Control	NON_TF
#1E6B52	AT4G08950	Control	NON_TF
#FFD602	AT3G18560	Control and Drought	NON_TF
#FFD602	AT4G29950	Control and Drought	NON_TF
#FFD602	AT2G32800	Control and Drought	NON_TF
#1E6B52	AT5G23130	Control	NON_TF
#FFD602	AT3G19030	Control and Drought	NON_TF
#FFD602	AT3G25600	Control and Drought	NON_TF
#1E6B52	AT1G68580	Control	NON_TF
#1E6B52	AT5G37710	Control	NON_TF
#FFD602	AT1G70290	Control and Drought	NON_TF
#FFD602	AT3G06070	Control and Drought	NON_TF
#FFD602	AT5G25190	Control and Drought	TF
#FFD602	AT2G38470	Control and Drought	TF
#FFD602	AT2G23810	Control and Drought	NON_TF
#FFD602	AT5G67300	Control and Drought	TF
#1E6B52	AT1G36370	Control	NON_TF
#FFD602	AT5G45340	Control and Drought	NON_TF
#1E6B52	AT4G28300	Control	NON_TF
#1E6B52	AT1G27770	Control	NON_TF
#FFD602	AT3G49530	Control and Drought	TF
#1E6B52	AT4G19420	Control	NON_TF
#1E6B52	AT5G04760	Control	TF
#1E6B52	AT2G43290	Control	NON_TF
#1E6B52	AT4G39070	Control	TF
#FFD602	AT2G41640	Control and Drought	NON_TF
#1E6B52	AT3G59080	Control	NON_TF
#1E6B52	AT2G41410	Control	NON_TF
#1E6B52	AT1G32920	Control	NON_TF
#1E6B52	AT3G06080	Control	NON_TF
#1E6B52	AT1G15550	Control	NON_TF
#FFD602	AT3G44260	Control and Drought	NON_TF
#1E6B52	AT1G11380	Control	NON_TF
#FFD602	AT4G24570	Control and Drought	NON_TF
#1E6B52	AT1G73830	Control	TF
#1E6B52	AT3G23030	Control	TF
#1E6B52	AT3G49790	Control	NON_TF
#1E6B52	AT2G01850	Control	NON_TF
#FFD602	AT4G25620	Control and Drought	NON_TF
#FFD602	AT3G57530	Control and Drought	NON_TF
#FFD602	AT4G29780	Control and Drought	NON_TF
#1E6B52	AT5G22390	Control	NON_TF
#1E6B52	AT1G35140	Control	NON_TF
#1E6B52	AT1G23480	Control	NON_TF
#FFD602	AT1G69570	Control and Drought	TF
#FFD602	AT1G19380	Control and Drought	NON_TF
#FFD602	AT3G11650	Control and Drought	NON_TF
#FFD602	AT2G39650	Control and Drought	NON_TF
#1E6B52	AT3G06750	Control	NON_TF
#A69363	AT1G66400	Drought	NON_TF
#A69363	AT2G41630	Drought	NON_TF
#FFD602	AT4G11280	Control and Drought	NON_TF
#A69363	AT1G77250	Drought	TF
#FFD602	AT3G04640	Control and Drought	NON_TF
#A69363	AT1G78080	Drought	TF
#A69363	AT1G63160	Drought	NON_TF
#A69363	AT5G50915	Drought	TF
#1E6B52	AT2G02070	Control	TF
#1E6B52	AT3G16180	Control	NON_TF
#FFD602	AT5G43060	Control and Drought	NON_TF
#1E6B52	AT5G41920	Control	TF
#1E6B52	AT2G33830	Control	NON_TF
#1E6B52	AT4G26670	Control	NON_TF
#FFD602	AT5G64860	Control and Drought	NON_TF
#1E6B52	AT3G27210	Control	NON_TF
#1E6B52	AT4G31050	Control	NON_TF
#1E6B52	AT3G05800	Control	NON_TF
#1E6B52	AT1G07280	Control	NON_TF
#1E6B52	AT5G51570	Control	NON_TF
#1E6B52	AT2G21130	Control	NON_TF
#FFD602	AT1G76590	Control and Drought	TF
#1E6B52	AT2G19450	Control	NON_TF
#1E6B52	AT1G11210	Control	NON_TF
#1E6B52	AT4G26660	Control	NON_TF
#1E6B52	AT1G48370	Control	NON_TF
#FFD602	AT1G51610	Control and Drought	NON_TF
#1E6B52	AT5G11150	Control	NON_TF
#FFD602	AT4G33490	Control and Drought	NON_TF
#FFD602	AT4G39090	Control and Drought	NON_TF
#1E6B52	AT3G07640	Control	NON_TF
#1E6B52	AT1G20840	Control	NON_TF
#1E6B52	AT3G47800	Control	NON_TF
#1E6B52	AT2G31870	Control	NON_TF
#1E6B52	AT5G50450	Control	NON_TF
#1E6B52	AT3G51400	Control	NON_TF
#1E6B52	AT4G19120	Control	NON_TF
#1E6B52	AT3G05220	Control	NON_TF
#1E6B52	AT5G18525	Control	NON_TF
#1E6B52	AT4G33980	Control	NON_TF
#1E6B52	AT5G25210	Control	NON_TF
#1E6B52	AT5G57110	Control	NON_TF
#FFD602	AT1G10760	Control and Drought	NON_TF
#1E6B52	AT3G61150	Control	TF
#FFD602	AT3G14310	Control and Drought	NON_TF
#1E6B52	AT5G62720	Control	NON_TF
#1E6B52	AT5G62890	Control	NON_TF
#1E6B52	AT5G54650	Control	NON_TF
#1E6B52	AT2G32810	Control	NON_TF
#FFD602	AT4G36940	Control and Drought	NON_TF
#1E6B52	AT2G37380	Control	NON_TF
#1E6B52	AT5G56610	Control	NON_TF
#FFD602	AT1G31850	Control and Drought	NON_TF
#FFD602	AT5G65310	Control and Drought	TF
#FFD602	AT3G02380	Control and Drought	TF
#1E6B52	AT5G64840	Control	NON_TF
#FFD602	AT3G17800	Control and Drought	NON_TF
#FFD602	AT5G15850	Control and Drought	TF
#FFD602	AT2G34460	Control and Drought	NON_TF
#FFD602	AT1G68440	Control and Drought	NON_TF
#FFD602	AT3G20310	Control and Drought	TF
#1E6B52	AT5G58650	Control	NON_TF
#FFD602	AT5G58090	Control and Drought	NON_TF
#1E6B52	AT5G56340	Control	NON_TF
#FFD602	AT5G58430	Control and Drought	NON_TF
#1E6B52	AT1G32460	Control	NON_TF
#FFD602	AT3G12400	Control and Drought	NON_TF
#FFD602	AT3G15530	Control and Drought	NON_TF
#FFD602	AT4G17460	Control and Drought	TF
#FFD602	AT5G13190	Control and Drought	NON_TF
#A69363	AT5G09760	Drought	NON_TF
#A69363	AT5G11650	Drought	NON_TF
#FFD602	AT2G30360	Control and Drought	NON_TF
#A69363	AT1G68690	Drought	NON_TF
#A69363	AT2G17480	Drought	NON_TF
#A69363	AT4G25390	Drought	NON_TF
#A69363	AT3G53810	Drought	NON_TF
#FFD602	AT3G52400	Control and Drought	NON_TF
#A69363	AT5G59220	Drought	NON_TF
#FFD602	AT2G26530	Control and Drought	NON_TF
#FFD602	AT1G29690	Control and Drought	NON_TF
#A69363	AT1G30040	Drought	NON_TF
#A69363	AT4G12720	Drought	NON_TF
#A69363	AT4G05020	Drought	NON_TF
#A69363	AT2G44840	Drought	TF
#A69363	AT5G66210	Drought	NON_TF
#A69363	AT1G61660	Drought	TF
#A69363	AT5G60790	Drought	NON_TF
#A69363	AT1G20310	Drought	NON_TF
#A69363	AT1G49430	Drought	NON_TF
#A69363	AT3G03050	Drought	NON_TF
#A69363	AT4G00570	Drought	NON_TF
#A69363	AT1G02400	Drought	NON_TF
#A69363	AT3G05580	Drought	NON_TF
#A69363	AT3G11420	Drought	NON_TF
#FFD602	AT1G72450	Control and Drought	TF
#A69363	AT3G04630	Drought	NON_TF
#A69363	AT4G39640	Drought	NON_TF
#FFD602	AT1G49560	Control and Drought	TF
#1E6B52	AT1G74680	Control	NON_TF
#FFD602	AT3G01310	Control and Drought	NON_TF
#1E6B52	AT3G19960	Control	NON_TF
#1E6B52	AT1G28230	Control	NON_TF
#1E6B52	AT1G21750	Control	NON_TF
#FFD602	AT2G40840	Control and Drought	NON_TF
#1E6B52	AT2G20270	Control	NON_TF
#1E6B52	AT5G03240	Control	NON_TF
#1E6B52	AT5G65620	Control	NON_TF
#1E6B52	AT1G47710	Control	NON_TF
#1E6B52	AT2G46490	Control	NON_TF
#1E6B52	AT5G07960	Control	NON_TF
#1E6B52	AT1G10090	Control	NON_TF
#1E6B52	AT2G04700	Control	NON_TF
#1E6B52	AT3G19400	Control	NON_TF
#1E6B52	AT4G12750	Control	NON_TF
#1E6B52	AT5G08580	Control	NON_TF
#1E6B52	AT5G18680	Control	TF
#1E6B52	AT5G66420	Control	NON_TF
#FFD602	AT5G36890	Control and Drought	NON_TF
#1E6B52	AT5G57700	Control	NON_TF
#FFD602	AT1G79500	Control and Drought	NON_TF
#FFD602	AT3G53800	Control and Drought	NON_TF
#1E6B52	AT1G34130	Control	NON_TF
#FFD602	AT3G50500	Control and Drought	NON_TF
#1E6B52	AT1G20693	Control	TF
#1E6B52	AT4G15110	Control	NON_TF
#1E6B52	AT5G41260	Control	NON_TF
#1E6B52	AT4G21960	Control	NON_TF
#1E6B52	AT3G18420	Control	NON_TF
#1E6B52	AT3G09250	Control	NON_TF
#1E6B52	AT2G18170	Control	NON_TF
#FFD602	AT3G46970	Control and Drought	NON_TF
#1E6B52	AT3G07320	Control	NON_TF
#1E6B52	AT1G07420	Control	NON_TF
#FFD602	AT2G45560	Control and Drought	NON_TF
#FFD602	AT5G27280	Control and Drought	NON_TF
#1E6B52	AT1G51090	Control	NON_TF
#1E6B52	AT5G58700	Control	NON_TF
#1E6B52	AT4G12590	Control	NON_TF
#FFD602	AT3G29320	Control and Drought	NON_TF
#1E6B52	AT2G27960	Control	NON_TF
#1E6B52	AT1G71060	Control	NON_TF
#FFD602	AT3G17020	Control and Drought	NON_TF
#1E6B52	AT1G64890	Control	NON_TF
#1E6B52	AT2G38670	Control	NON_TF
#1E6B52	AT2G47890	Control	TF
#1E6B52	AT5G16380	Control	NON_TF
#FFD602	AT1G80480	Control and Drought	NON_TF
#1E6B52	AT4G38770	Control	NON_TF
#1E6B52	AT5G46860	Control	NON_TF
#1E6B52	AT3G49390	Control	NON_TF
#FFD602	AT1G20620	Control and Drought	NON_TF
#1E6B52	AT4G25500	Control	NON_TF
#1E6B52	AT1G05180	Control	NON_TF
#1E6B52	AT2G16600	Control	NON_TF
#1E6B52	AT1G75960	Control	NON_TF
#1E6B52	AT1G08550	Control	NON_TF
#FFD602	AT2G22660	Control and Drought	NON_TF
#1E6B52	AT1G28050	Control	TF
#1E6B52	AT5G42420	Control	NON_TF
#1E6B52	AT1G13930	Control	NON_TF
#1E6B52	AT5G03940	Control	NON_TF
#1E6B52	AT3G09540	Control	NON_TF
#1E6B52	AT4G14230	Control	NON_TF
#1E6B52	AT2G28840	Control	NON_TF
#1E6B52	AT1G20696	Control	TF
#FFD602	AT1G75190	Control and Drought	NON_TF
#FFD602	AT3G26740	Control and Drought	NON_TF
#1E6B52	AT1G49230	Control	NON_TF
#1E6B52	AT5G02860	Control	NON_TF
#1E6B52	AT4G20430	Control	NON_TF
#FFD602	AT1G30360	Control and Drought	NON_TF
#1E6B52	AT3G12120	Control	NON_TF
#1E6B52	AT5G26570	Control	NON_TF
#1E6B52	AT5G44730	Control	NON_TF
#1E6B52	AT4G11600	Control	NON_TF
#1E6B52	AT1G71695	Control	NON_TF
#1E6B52	AT5G39410	Control	NON_TF
#FFD602	AT4G33670	Control and Drought	NON_TF
#1E6B52	AT2G28720	Control	NON_TF
#1E6B52	AT1G53035	Control	NON_TF
#1E6B52	AT2G01170	Control	NON_TF
#1E6B52	AT1G56300	Control	NON_TF
#1E6B52	AT5G50375	Control	NON_TF
#1E6B52	AT3G63170	Control	NON_TF
#1E6B52	AT4G23040	Control	NON_TF
#1E6B52	AT4G35300	Control	NON_TF
#FFD602	AT5G05200	Control and Drought	NON_TF
#FFD602	AT3G56720	Control and Drought	NON_TF
#FFD602	AT5G10780	Control and Drought	NON_TF
#1E6B52	AT5G58600	Control	NON_TF
#A69363	AT1G31830	Drought	NON_TF
#A69363	AT5G19440	Drought	NON_TF
#A69363	AT5G09630	Drought	NON_TF
#1E6B52	AT4G37260	Control	TF
#FFD602	AT1G80440	Control and Drought	NON_TF
#1E6B52	AT2G44130	Control	NON_TF
#1E6B52	AT2G36050	Control	TF
#FFD602	AT1G28370	Control and Drought	TF
#1E6B52	AT5G54730	Control	NON_TF
#FFD602	AT1G19770	Control and Drought	NON_TF
#1E6B52	AT1G23710	Control	NON_TF
#FFD602	AT5G56100	Control and Drought	NON_TF
#FFD602	AT3G15500	Control and Drought	TF
#FFD602	AT1G74930	Control and Drought	TF
#1E6B52	AT4G10910	Control	NON_TF
#FFD602	AT5G46710	Control and Drought	TF
#FFD602	AT4G17500	Control and Drought	TF
#1E6B52	AT2G17880	Control	NON_TF
#1E6B52	AT4G35240	Control	NON_TF
#FFD602	AT3G19580	Control and Drought	TF
#FFD602	AT2G25900	Control and Drought	TF
#FFD602	AT3G16720	Control and Drought	NON_TF
#FFD602	AT1G25400	Control and Drought	NON_TF
#1E6B52	AT1G76650	Control	NON_TF
#FFD602	AT1G68840	Control and Drought	TF
#FFD602	AT4G27410	Control and Drought	TF
#1E6B52	AT2G31945	Control	NON_TF
#1E6B52	AT3G10985	Control	NON_TF
#FFD602	AT1G27730	Control and Drought	TF
#FFD602	AT3G07350	Control and Drought	NON_TF
#1E6B52	AT1G73540	Control	NON_TF
#FFD602	AT3G10930	Control and Drought	NON_TF
#FFD602	AT2G40140	Control and Drought	TF
#A69363	AT1G48570	Drought	NON_TF
#A69363	AT5G17350	Drought	NON_TF
#A69363	AT1G31660	Drought	NON_TF
#A69363	AT5G14520	Drought	NON_TF
#1E6B52	AT3G13310	Control	NON_TF
#FFD602	AT4G37790	Control and Drought	TF
#FFD602	AT4G01250	Control and Drought	TF
#1E6B52	AT1G59590	Control	NON_TF
#FFD602	AT1G51700	Control and Drought	TF
#FFD602	AT5G39660	Control and Drought	TF
#FFD602	AT5G47050	Control and Drought	NON_TF
#1E6B52	AT5G58120	Control	NON_TF
#1E6B52	AT1G72300	Control	NON_TF
#1E6B52	AT4G28290	Control	NON_TF
#1E6B52	AT1G66130	Control	NON_TF
#A69363	AT1G12580	Drought	NON_TF
#A69363	AT5G54490	Drought	NON_TF
#A69363	AT3G45730	Drought	NON_TF
#A69363	AT3G18710	Drought	NON_TF
#FFD602	AT4G34150	Control and Drought	NON_TF
#FFD602	AT4G02200	Control and Drought	NON_TF
#A69363	AT5G47960	Drought	NON_TF
#A69363	AT5G04550	Drought	NON_TF
#A69363	AT3G61620	Drought	NON_TF
#FFD602	AT3G22840	Control and Drought	NON_TF
#A69363	AT1G67880	Drought	NON_TF
#A69363	AT3G62260	Drought	TF
#A69363	AT5G16200	Drought	NON_TF
#A69363	AT1G48650	Drought	NON_TF
#FFD602	AT3G52800	Control and Drought	NON_TF
#A69363	AT2G25690	Drought	NON_TF
#A69363	AT1G30690	Drought	NON_TF
#A69363	AT1G71890	Drought	NON_TF
#A69363	AT1G27340	Drought	NON_TF
#FFD602	AT4G01950	Control and Drought	NON_TF
#FFD602	AT1G63750	Control and Drought	NON_TF
#A69363	AT4G37910	Drought	NON_TF
#FFD602	AT4G33920	Control and Drought	NON_TF
#A69363	AT5G64660	Drought	NON_TF
#A69363	AT1G54270	Drought	NON_TF
#A69363	AT5G62570	Drought	NON_TF
#FFD602	AT5G17300	Control and Drought	TF
#1E6B52	AT5G46780	Control	NON_TF
#1E6B52	AT1G18570	Control	TF
#FFD602	AT5G47220	Control and Drought	TF
#1E6B52	AT5G45110	Control	TF
#FFD602	AT3G05200	Control and Drought	NON_TF
#FFD602	AT1G72520	Control and Drought	NON_TF
#FFD602	AT1G74450	Control and Drought	NON_TF
#FFD602	AT3G46620	Control and Drought	NON_TF
#A69363	AT4G24110	Drought	NON_TF
#A69363	AT4G27720	Drought	NON_TF
#A69363	AT4G02330	Drought	NON_TF
#FFD602	AT5G04340	Control and Drought	TF
#A69363	AT5G04870	Drought	NON_TF
#A69363	AT5G42940	Drought	NON_TF
#A69363	AT2G24600	Drought	NON_TF
#A69363	AT4G02380	Drought	NON_TF
#A69363	AT3G19130	Drought	NON_TF
#A69363	AT3G22160	Drought	NON_TF
#A69363	AT4G27350	Drought	NON_TF
#A69363	AT5G59820	Drought	TF
#1E6B52	AT1G03590	Control	NON_TF
#FFD602	AT5G28770	Control and Drought	TF
#FFD602	AT3G57040	Control and Drought	TF
#FFD602	AT1G18460	Control and Drought	NON_TF
#1E6B52	AT5G05860	Control	NON_TF
#FFD602	AT5G47560	Control and Drought	NON_TF
#FFD602	AT3G62930	Control and Drought	NON_TF
#FFD602	AT5G16830	Control and Drought	NON_TF
#FFD602	AT5G15830	Control and Drought	TF
#1E6B52	AT2G28305	Control	NON_TF
#1E6B52	AT4G20380	Control	NON_TF
#1E6B52	AT5G13100	Control	NON_TF
#1E6B52	AT5G67440	Control	NON_TF
#A69363	AT2G19540	Drought	NON_TF
#FFD602	AT3G55560	Control and Drought	NON_TF
#A69363	AT3G50560	Drought	NON_TF
#A69363	AT1G80640	Drought	NON_TF
#A69363	AT2G38480	Drought	NON_TF
#A69363	AT1G69700	Drought	NON_TF
#A69363	AT5G18670	Drought	NON_TF
#1E6B52	AT1G10020	Control	NON_TF
#1E6B52	AT4G37540	Control	TF
#1E6B52	AT3G14090	Control	NON_TF
#FFD602	AT2G44500	Control and Drought	NON_TF
#FFD602	AT3G15210	Control and Drought	TF
#1E6B52	AT1G35350	Control	NON_TF
#FFD602	AT1G70740	Control and Drought	NON_TF
#1E6B52	AT2G17550	Control	NON_TF
#FFD602	AT5G42050	Control and Drought	NON_TF
#1E6B52	AT3G07340	Control	TF
#1E6B52	AT2G30930	Control	NON_TF
#1E6B52	AT4G10925	Control	NON_TF
#1E6B52	AT5G64260	Control	NON_TF
#1E6B52	AT4G30440	Control	NON_TF
#1E6B52	AT5G02290	Control	NON_TF
#A69363	AT1G14370	Drought	NON_TF
#A69363	AT5G66650	Drought	NON_TF
#A69363	AT4G12040	Drought	NON_TF
#A69363	AT4G23190	Drought	NON_TF
#A69363	AT4G30430	Drought	NON_TF
#A69363	AT1G17420	Drought	NON_TF
#A69363	AT5G12940	Drought	NON_TF
#A69363	AT2G41900	Drought	TF
#A69363	AT3G44400	Drought	NON_TF
#A69363	AT3G54200	Drought	NON_TF
#A69363	AT3G09830	Drought	NON_TF
#A69363	AT5G45280	Drought	NON_TF
#A69363	AT4G21940	Drought	NON_TF
#A69363	AT5G65300	Drought	NON_TF
#A69363	AT4G30210	Drought	NON_TF
#A69363	AT4G27520	Drought	NON_TF
#A69363	AT4G12000	Drought	NON_TF
#A69363	AT4G30280	Drought	NON_TF
#A69363	AT1G76040	Drought	NON_TF
#A69363	AT5G26030	Drought	NON_TF
#A69363	AT4G36010	Drought	NON_TF
#A69363	AT4G15480	Drought	NON_TF
#A69363	AT1G69840	Drought	NON_TF
#A69363	AT3G26980	Drought	NON_TF
#A69363	AT2G16900	Drought	NON_TF
#A69363	AT2G29440	Drought	NON_TF
#A69363	AT2G46940	Drought	NON_TF
#FFD602	AT1G80840	Control and Drought	TF
#A69363	AT2G22080	Drought	NON_TF
#A69363	AT5G59730	Drought	NON_TF
#A69363	AT3G60260	Drought	NON_TF
#A69363	AT1G74950	Drought	TF
#FFD602	AT5G52310	Control and Drought	NON_TF
#A69363	AT5G07070	Drought	NON_TF
#A69363	AT4G30290	Drought	NON_TF
#A69363	AT4G30996	Drought	NON_TF
#A69363	AT5G22630	Drought	NON_TF
#A69363	AT4G20880	Drought	NON_TF
#A69363	AT5G22250	Drought	NON_TF
#A69363	AT1G42470	Drought	NON_TF
#A69363	AT5G01730	Drought	NON_TF
#FFD602	AT2G46270	Control and Drought	TF
#A69363	AT5G49520	Drought	TF
#A69363	AT2G06050	Drought	NON_TF
#A69363	AT1G61890	Drought	NON_TF
#A69363	AT2G46370	Drought	NON_TF
#A69363	AT5G12340	Drought	NON_TF
#A69363	AT5G42380	Drought	NON_TF
#A69363	AT4G14365	Drought	NON_TF
#A69363	AT5G54300	Drought	NON_TF
#A69363	AT5G03720	Drought	TF
#A69363	AT5G53760	Drought	NON_TF
#A69363	AT1G32640	Drought	TF
#A69363	AT1G77280	Drought	NON_TF
#A69363	AT1G22510	Drought	NON_TF
#A69363	AT4G36500	Drought	NON_TF
#A69363	AT4G12410	Drought	NON_TF
#A69363	AT5G53050	Drought	NON_TF
#A69363	AT1G50640	Drought	TF
#A69363	AT3G29575	Drought	NON_TF
#A69363	AT5G40390	Drought	NON_TF
#A69363	AT5G46410	Drought	NON_TF
#A69363	AT3G06150	Drought	NON_TF
#A69363	AT3G05640	Drought	NON_TF
#A69363	AT3G55430	Drought	NON_TF
#A69363	AT1G33260	Drought	NON_TF
#A69363	AT5G52750	Drought	NON_TF
#A69363	AT5G48450	Drought	NON_TF
#A69363	AT1G20510	Drought	NON_TF
#A69363	AT1G17380	Drought	TF
#A69363	AT4G35550	Drought	TF
#A69363	AT5G66640	Drought	NON_TF
#A69363	AT2G01450	Drought	NON_TF
#A69363	AT3G50760	Drought	NON_TF
#A69363	AT2G32930	Drought	TF
#A69363	AT5G41600	Drought	NON_TF
#A69363	AT4G22780	Drought	NON_TF
#FFD602	AT2G27690	Control and Drought	NON_TF
#A69363	AT1G52890	Drought	TF
#A69363	AT4G30600	Drought	NON_TF
#A69363	AT1G61610	Drought	NON_TF
#A69363	AT1G70700	Drought	TF
#A69363	AT1G61800	Drought	NON_TF
#A69363	AT2G22880	Drought	NON_TF
#A69363	AT2G03240	Drought	NON_TF
#A69363	AT5G08130	Drought	TF
#A69363	AT2G22500	Drought	NON_TF
#FFD602	AT2G22430	Control and Drought	TF
#1E6B52	AT2G26200	Control	NON_TF
#1E6B52	AT1G51510	Control	NON_TF
#1E6B52	AT1G63830	Control	NON_TF
#1E6B52	AT5G65670	Control	TF
#1E6B52	AT2G26230	Control	NON_TF
#A69363	AT3G53960	Drought	NON_TF
#A69363	AT3G06500	Drought	NON_TF
#1E6B52	AT1G68670	Control	TF
#1E6B52	AT1G27200	Control	NON_TF
#1E6B52	AT3G62950	Control	NON_TF
#1E6B52	AT5G02020	Control	NON_TF
#1E6B52	AT3G48100	Control	TF
#1E6B52	AT5G53130	Control	NON_TF
#1E6B52	AT1G67910	Control	NON_TF
#1E6B52	AT5G05140	Control	NON_TF
#1E6B52	AT1G12240	Control	NON_TF
#1E6B52	AT1G03610	Control	NON_TF
#1E6B52	AT5G18650	Control	NON_TF
#1E6B52	AT5G14070	Control	NON_TF
#1E6B52	AT3G29670	Control	NON_TF
#FFD602	AT1G31130	Control and Drought	NON_TF
#FFD602	AT5G58900	Control and Drought	TF
#1E6B52	AT1G68220	Control	NON_TF
#1E6B52	AT3G23280	Control	NON_TF
#1E6B52	AT5G64560	Control	NON_TF
#1E6B52	AT1G05620	Control	NON_TF
#1E6B52	AT2G43550	Control	NON_TF
#FFD602	AT2G27680	Control and Drought	NON_TF
#FFD602	AT2G25930	Control and Drought	NON_TF
#1E6B52	AT1G09795	Control	NON_TF
#FFD602	AT2G25730	Control and Drought	NON_TF
#1E6B52	AT3G56680	Control	NON_TF
#FFD602	AT2G47390	Control and Drought	NON_TF
#FFD602	AT1G21600	Control and Drought	NON_TF
#A69363	AT3G11230	Drought	NON_TF
#A69363	AT4G39080	Drought	NON_TF
#FFD602	AT3G24760	Control and Drought	NON_TF
#A69363	AT4G24990	Drought	NON_TF
#A69363	AT5G15230	Drought	NON_TF
#A69363	AT4G30500	Drought	NON_TF
#A69363	AT1G25275	Drought	NON_TF
#FFD602	AT3G05970	Control and Drought	NON_TF
#A69363	AT5G04470	Drought	NON_TF
#A69363	AT3G49620	Drought	NON_TF
#FFD602	AT5G08520	Control and Drought	TF
#FFD602	AT3G47160	Control and Drought	NON_TF
#FFD602	AT4G05150	Control and Drought	NON_TF
#FFD602	AT5G03470	Control and Drought	NON_TF
#1E6B52	AT2G15890	Control	NON_TF
#FFD602	AT5G02160	Control and Drought	NON_TF
#A69363	AT4G30690	Drought	NON_TF
#A69363	AT1G70820	Drought	NON_TF
#A69363	AT2G33150	Drought	NON_TF
#FFD602	AT3G19490	Control and Drought	NON_TF
#FFD602	AT4G27440	Control and Drought	NON_TF
#A69363	AT5G18640	Drought	NON_TF
#A69363	AT2G43535	Drought	NON_TF
#A69363	AT3G06483	Drought	NON_TF
#FFD602	AT1G49720	Control and Drought	TF
#A69363	AT5G47020	Drought	NON_TF
#A69363	AT3G52840	Drought	NON_TF
#A69363	AT3G57470	Drought	NON_TF
#A69363	AT1G26580	Drought	NON_TF
#A69363	AT5G35170	Drought	NON_TF
#A69363	AT2G28660	Drought	NON_TF
#A69363	AT1G22620	Drought	NON_TF
#A69363	AT3G60130	Drought	NON_TF
#A69363	AT1G24440	Drought	NON_TF
#A69363	AT3G26580	Drought	NON_TF
#A69363	AT1G08660	Drought	NON_TF
#A69363	AT3G10120	Drought	NON_TF
#A69363	AT3G22970	Drought	NON_TF
#A69363	AT1G04400	Drought	NON_TF
#A69363	AT3G51390	Drought	NON_TF
#A69363	AT1G02305	Drought	NON_TF
#FFD602	AT3G62550	Control and Drought	NON_TF
#A69363	AT4G18930	Drought	NON_TF
#FFD602	AT3G18080	Control and Drought	NON_TF
#A69363	AT1G07040	Drought	NON_TF
#A69363	AT3G58750	Drought	NON_TF
#A69363	AT5G64920	Drought	NON_TF
#A69363	AT5G43810	Drought	NON_TF
#FFD602	AT1G16840	Control and Drought	NON_TF
#A69363	AT5G18590	Drought	NON_TF
#A69363	AT1G60140	Drought	NON_TF
#A69363	AT1G77210	Drought	NON_TF
#A69363	AT1G49300	Drought	NON_TF
#FFD602	AT2G46550	Control and Drought	NON_TF
#A69363	AT1G12780	Drought	NON_TF
#A69363	AT1G68560	Drought	NON_TF
#A69363	AT1G52140	Drought	NON_TF
#FFD602	AT1G05575	Control and Drought	NON_TF
#FFD602	AT5G67450	Control and Drought	TF
#A69363	AT5G38210	Drought	NON_TF
#FFD602	AT2G33580	Control and Drought	NON_TF
#A69363	AT5G27420	Drought	NON_TF
#A69363	AT3G26910	Drought	NON_TF
#A69363	AT1G29340	Drought	NON_TF
#A69363	AT4G02410	Drought	NON_TF
#A69363	AT3G24520	Drought	TF
#A69363	AT5G15870	Drought	NON_TF
#A69363	AT3G14440	Drought	NON_TF
#A69363	AT1G07870	Drought	NON_TF
#A69363	AT5G63790	Drought	TF
#A69363	AT1G01720	Drought	TF
#A69363	AT5G39785	Drought	NON_TF
#A69363	AT5G64310	Drought	NON_TF
#A69363	AT3G63060	Drought	NON_TF
#A69363	AT5G63130	Drought	NON_TF
#A69363	AT5G67250	Drought	NON_TF
#A69363	AT3G02800	Drought	NON_TF
#A69363	AT3G54130	Drought	NON_TF
#A69363	AT5G41100	Drought	NON_TF
#1E6B52	AT4G08040	Control	NON_TF
#A69363	AT1G42990	Drought	TF
#A69363	AT1G73805	Drought	NON_TF
#A69363	AT3G47080	Drought	NON_TF
#A69363	AT1G53170	Drought	TF
#A69363	AT5G59450	Drought	TF
#FFD602	AT1G33240	Control and Drought	TF
#1E6B52	AT3G07360	Control	NON_TF
#A69363	AT4G39770	Drought	NON_TF
#1E6B52	AT4G01330	Control	NON_TF
#1E6B52	AT3G04730	Control	TF
#1E6B52	AT1G79700	Control	TF
#FFD602	AT2G20180	Control and Drought	TF
#1E6B52	AT1G03850	Control	NON_TF
#1E6B52	AT5G10695	Control	NON_TF
#FFD602	AT5G26920	Control and Drought	NON_TF
#1E6B52	AT1G28280	Control	NON_TF
#FFD602	AT4G23810	Control and Drought	TF
#A69363	AT1G48100	Drought	NON_TF
#A69363	AT1G50740	Drought	NON_TF
#A69363	AT5G66070	Drought	NON_TF
#A69363	AT2G46400	Drought	TF
#A69363	AT1G62440	Drought	NON_TF
#A69363	AT3G47540	Drought	NON_TF
#A69363	AT1G19970	Drought	NON_TF
#A69363	AT2G42760	Drought	NON_TF
#FFD602	AT5G47370	Control and Drought	TF
#1E6B52	AT4G19160	Control	NON_TF
#FFD602	AT1G67340	Control and Drought	NON_TF
#1E6B52	AT3G17510	Control	NON_TF
#1E6B52	AT4G36730	Control	TF
#FFD602	AT1G01060	Control and Drought	TF
#1E6B52	AT1G32900	Control	NON_TF
#FFD602	AT3G19450	Control and Drought	NON_TF
#1E6B52	AT5G14760	Control	NON_TF
#1E6B52	AT4G10040	Control	NON_TF
#FFD602	AT2G30490	Control and Drought	NON_TF
#FFD602	AT1G65870	Control and Drought	NON_TF
#1E6B52	AT1G70250	Control	NON_TF
#1E6B52	AT2G34357	Control	NON_TF
#1E6B52	AT4G26110	Control	NON_TF
#1E6B52	AT2G04795	Control	NON_TF
#1E6B52	AT3G27170	Control	NON_TF
#FFD602	AT3G24170	Control and Drought	NON_TF
#FFD602	AT2G41250	Control and Drought	NON_TF
#1E6B52	AT5G58420	Control	NON_TF
#1E6B52	AT2G37040	Control	NON_TF
#FFD602	AT3G15850	Control and Drought	NON_TF
#FFD602	AT3G26570	Control and Drought	NON_TF
#A69363	AT3G29030	Drought	NON_TF
#A69363	AT1G07570	Drought	NON_TF
#A69363	AT4G39780	Drought	TF
#A69363	AT3G48560	Drought	NON_TF
#FFD602	AT1G02820	Control and Drought	NON_TF
#FFD602	AT3G18750	Control and Drought	NON_TF
#A69363	AT5G16590	Drought	NON_TF
#A69363	AT4G26480	Drought	NON_TF
#A69363	AT5G48760	Drought	NON_TF
#A69363	AT3G55960	Drought	NON_TF
#A69363	AT2G21650	Drought	NON_TF
#A69363	AT4G14350	Drought	NON_TF
#A69363	AT5G04280	Drought	NON_TF
#A69363	AT1G29660	Drought	NON_TF
#A69363	AT1G69530	Drought	NON_TF
#A69363	AT5G17230	Drought	NON_TF
#A69363	AT4G30950	Drought	NON_TF
#FFD602	AT2G03730	Control and Drought	NON_TF
#FFD602	AT1G65490	Control and Drought	NON_TF
#A69363	AT3G21110	Drought	NON_TF
#A69363	AT1G67700	Drought	NON_TF
#A69363	AT2G38730	Drought	NON_TF
#A69363	AT5G64850	Drought	NON_TF
#A69363	AT4G18970	Drought	NON_TF
#A69363	AT5G54130	Drought	NON_TF
#A69363	AT3G17330	Drought	NON_TF
#FFD602	AT2G21320	Control and Drought	TF
#A69363	AT2G01890	Drought	NON_TF
#FFD602	AT5G16820	Control and Drought	TF
#FFD602	AT2G20740	Control and Drought	NON_TF
#1E6B52	AT4G31060	Control	TF
#1E6B52	AT1G01820	Control	NON_TF
#FFD602	AT1G05805	Control and Drought	TF
#FFD602	AT5G66880	Control and Drought	NON_TF
#FFD602	AT2G31800	Control and Drought	NON_TF
#FFD602	AT2G15960	Control and Drought	NON_TF
#FFD602	AT1G51940	Control and Drought	NON_TF
#FFD602	AT5G43440	Control and Drought	NON_TF
#1E6B52	AT3G53990	Control	NON_TF
#1E6B52	AT3G10300	Control	NON_TF
#1E6B52	AT5G63810	Control	NON_TF
#1E6B52	AT1G20440	Control	NON_TF
#FFD602	AT3G19553	Control and Drought	NON_TF
#FFD602	AT4G22540	Control and Drought	NON_TF
#1E6B52	AT1G19310	Control	NON_TF
#1E6B52	AT5G24490	Control	NON_TF
#1E6B52	AT1G66890	Control	NON_TF
#1E6B52	AT4G23820	Control	NON_TF
#1E6B52	AT1G22540	Control	NON_TF
#A69363	AT2G07180	Drought	NON_TF
#A69363	AT3G12290	Drought	NON_TF
#A69363	AT2G27200	Drought	NON_TF
#A69363	AT2G29020	Drought	NON_TF
#A69363	AT2G02760	Drought	NON_TF
#A69363	AT1G50940	Drought	NON_TF
#A69363	AT2G39900	Drought	TF
#A69363	AT3G59820	Drought	NON_TF
#A69363	AT1G74410	Drought	NON_TF
#A69363	AT5G27380	Drought	NON_TF
#A69363	AT1G69390	Drought	NON_TF
#A69363	AT1G73980	Drought	NON_TF
#A69363	AT4G34030	Drought	NON_TF
#A69363	AT1G77000	Drought	NON_TF
#A69363	AT2G39920	Drought	NON_TF
#A69363	AT1G13990	Drought	NON_TF
#A69363	AT3G57050	Drought	NON_TF
#A69363	AT5G57655	Drought	NON_TF
#A69363	AT3G45770	Drought	NON_TF
#A69363	AT5G45610	Drought	NON_TF
#A69363	AT1G68820	Drought	NON_TF
#A69363	AT5G10790	Drought	NON_TF
#A69363	AT4G17150	Drought	NON_TF
#A69363	AT5G19330	Drought	TF
#A69363	AT1G12845	Drought	NON_TF
#A69363	AT3G19640	Drought	NON_TF
#A69363	AT1G76150	Drought	NON_TF
#A69363	AT4G33090	Drought	NON_TF
#A69363	AT3G22740	Drought	NON_TF
#A69363	AT1G02260	Drought	NON_TF
#A69363	AT1G05380	Drought	TF
#A69363	AT4G29010	Drought	NON_TF
#A69363	AT4G36630	Drought	NON_TF
#A69363	AT2G02570	Drought	NON_TF
#A69363	AT5G59250	Drought	NON_TF
#A69363	AT1G48790	Drought	NON_TF
#A69363	AT5G06690	Drought	NON_TF
#A69363	AT5G61040	Drought	NON_TF
#A69363	AT1G69830	Drought	NON_TF
#A69363	AT2G46240	Drought	NON_TF
#FFD602	AT4G17100	Control and Drought	NON_TF
#A69363	AT5G27930	Drought	NON_TF
#A69363	AT2G39930	Drought	NON_TF
#A69363	AT1G61670	Drought	NON_TF
#A69363	AT2G21430	Drought	NON_TF
#A69363	AT2G21240	Drought	TF
#A69363	AT5G49555	Drought	NON_TF
#A69363	AT1G72340	Drought	NON_TF
#A69363	AT5G65760	Drought	NON_TF
#A69363	AT2G14170	Drought	NON_TF
#1E6B52	AT5G58110	Control	NON_TF
#FFD602	AT5G51190	Control and Drought	TF
#1E6B52	AT3G02550	Control	TF
#A69363	AT1G10840	Drought	NON_TF
#A69363	AT3G23620	Drought	NON_TF
#A69363	AT5G15200	Drought	NON_TF
#A69363	AT3G57290	Drought	NON_TF
#FFD602	AT1G74840	Control and Drought	TF
#1E6B52	AT1G21920	Control	NON_TF
#1E6B52	AT4G02075	Control	NON_TF
#1E6B52	AT2G29300	Control	NON_TF
#1E6B52	AT5G55970	Control	NON_TF
#1E6B52	AT5G59080	Control	NON_TF
#1E6B52	AT2G27830	Control	NON_TF
#1E6B52	AT3G61060	Control	NON_TF
#1E6B52	AT2G32150	Control	NON_TF
#1E6B52	AT2G24550	Control	NON_TF
#1E6B52	AT3G49810	Control	NON_TF
#1E6B52	AT1G10150	Control	NON_TF
#FFD602	AT3G02170	Control and Drought	NON_TF
#1E6B52	AT2G20670	Control	NON_TF
#1E6B52	AT1G21010	Control	NON_TF
#FFD602	AT1G71970	Control and Drought	NON_TF
#FFD602	AT3G19380	Control and Drought	NON_TF
#A69363	AT4G25490	Drought	TF
#FFD602	AT5G05090	Control and Drought	TF
#1E6B52	AT5G12120	Control	NON_TF
#1E6B52	AT3G18050	Control	NON_TF
#A69363	AT5G63800	Drought	NON_TF
#1E6B52	AT5G67190	Control	TF
#FFD602	AT1G69490	Control and Drought	TF
#1E6B52	AT5G24890	Control	NON_TF
#FFD602	AT3G57550	Control and Drought	NON_TF
#FFD602	AT2G17040	Control and Drought	TF
#A69363	AT2G27260	Drought	NON_TF
#A69363	AT3G50930	Drought	NON_TF
#A69363	AT5G66460	Drought	NON_TF
#1E6B52	AT1G16720	Control	NON_TF
#FFD602	AT1G26560	Control and Drought	NON_TF
#1E6B52	AT3G22420	Control	NON_TF
#1E6B52	AT5G47040	Control	NON_TF
#1E6B52	AT4G22920	Control	NON_TF
#FFD602	AT3G27350	Control and Drought	NON_TF
#FFD602	AT2G41290	Control and Drought	NON_TF
#1E6B52	AT1G17050	Control	NON_TF
#FFD602	AT1G79270	Control and Drought	NON_TF
#FFD602	AT3G01060	Control and Drought	NON_TF
#1E6B52	AT4G15530	Control	NON_TF
#FFD602	AT1G55960	Control and Drought	NON_TF
#1E6B52	AT1G73390	Control	NON_TF
#1E6B52	AT4G39540	Control	NON_TF
#FFD602	AT4G15430	Control and Drought	NON_TF
#1E6B52	AT1G50020	Control	NON_TF
#FFD602	AT2G24540	Control and Drought	NON_TF
#FFD602	AT4G34000	Control and Drought	TF
#A69363	AT1G75100	Drought	NON_TF
#A69363	AT4G07960	Drought	NON_TF
#FFD602	AT1G44000	Control and Drought	NON_TF
#A69363	AT3G22530	Drought	NON_TF
#A69363	AT2G24100	Drought	NON_TF
#A69363	AT1G67120	Drought	NON_TF
#A69363	AT2G31380	Drought	TF
#A69363	AT4G32190	Drought	NON_TF
#A69363	AT1G62250	Drought	NON_TF
#A69363	AT4G08930	Drought	NON_TF
#A69363	AT2G37460	Drought	NON_TF
#A69363	AT1G76990	Drought	NON_TF
#FFD602	AT1G70940	Control and Drought	NON_TF
#FFD602	AT3G12320	Control and Drought	NON_TF
#A69363	AT1G66330	Drought	NON_TF
#A69363	AT2G21050	Drought	NON_TF
#A69363	AT1G21050	Drought	NON_TF
#FFD602	AT3G21390	Control and Drought	NON_TF
#FFD602	AT2G26800	Control and Drought	NON_TF
#A69363	AT5G01030	Drought	NON_TF
#A69363	AT3G24460	Drought	NON_TF
#A69363	AT1G64530	Drought	TF
#1E6B52	AT1G32170	Control	NON_TF
#FFD602	AT2G28810	Control and Drought	TF
#1E6B52	AT1G03160	Control	NON_TF
#1E6B52	AT1G49670	Control	NON_TF
#1E6B52	AT5G50180	Control	NON_TF
#1E6B52	AT5G05740	Control	NON_TF
#1E6B52	AT2G29760	Control	NON_TF
#1E6B52	AT5G41410	Control	TF
#FFD602	AT5G17520	Control and Drought	NON_TF
#1E6B52	AT5G57970	Control	NON_TF
#FFD602	AT5G17700	Control and Drought	NON_TF
#1E6B52	AT5G63780	Control	NON_TF
#1E6B52	AT1G65900	Control	NON_TF
#1E6B52	AT4G32980	Control	TF
#1E6B52	AT4G20270	Control	NON_TF
#1E6B52	AT2G15820	Control	NON_TF
#1E6B52	AT5G59350	Control	NON_TF
#1E6B52	AT5G59130	Control	NON_TF
#1E6B52	AT2G38010	Control	NON_TF
#1E6B52	AT4G12910	Control	NON_TF
#1E6B52	AT5G08370	Control	NON_TF
#1E6B52	AT2G18950	Control	NON_TF
#1E6B52	AT3G48350	Control	NON_TF
#1E6B52	AT4G28706	Control	NON_TF
#1E6B52	AT1G64150	Control	NON_TF
#1E6B52	AT5G66190	Control	NON_TF
#1E6B52	AT1G03310	Control	NON_TF
#1E6B52	AT1G35720	Control	NON_TF
#1E6B52	AT3G12950	Control	NON_TF
#1E6B52	AT4G33700	Control	NON_TF
#1E6B52	AT5G08400	Control	NON_TF
#1E6B52	AT1G23820	Control	NON_TF
#1E6B52	AT2G45540	Control	NON_TF
#1E6B52	AT4G29210	Control	NON_TF
#1E6B52	AT5G08500	Control	NON_TF
#FFD602	AT5G11060	Control and Drought	TF
#1E6B52	AT5G53020	Control	NON_TF
#1E6B52	AT1G05960	Control	NON_TF
#1E6B52	AT2G04160	Control	NON_TF
#A69363	AT1G79620	Drought	NON_TF
#A69363	AT4G14340	Drought	NON_TF
#A69363	AT3G06420	Drought	NON_TF
#A69363	AT1G29400	Drought	NON_TF
#A69363	AT1G65040	Drought	NON_TF
#1E6B52	AT2G25735	Control	NON_TF
#1E6B52	AT5G59550	Control	NON_TF
#1E6B52	AT4G17900	Control	TF
#1E6B52	AT2G26190	Control	NON_TF
#FFD602	AT3G24050	Control and Drought	TF
#1E6B52	AT1G68400	Control	NON_TF
#A69363	AT5G55380	Drought	NON_TF
#1E6B52	AT5G42830	Control	NON_TF
#FFD602	AT4G33050	Control and Drought	NON_TF
#A69363	AT3G11820	Drought	NON_TF
#A69363	AT3G01830	Drought	NON_TF
#A69363	AT2G20880	Drought	TF
#A69363	AT1G19180	Drought	TF
#A69363	AT5G54170	Drought	NON_TF
#A69363	AT2G41110	Drought	NON_TF
#FFD602	AT3G10500	Control and Drought	TF
#1E6B52	AT1G30900	Control	NON_TF
#A69363	AT3G60420	Drought	NON_TF
#FFD602	AT3G09600	Control and Drought	TF
#1E6B52	AT2G31750	Control	NON_TF
#1E6B52	AT5G26210	Control	TF
#1E6B52	AT1G76570	Control	NON_TF
#1E6B52	AT4G37760	Control	NON_TF
#FFD602	AT3G54510	Control and Drought	NON_TF
#1E6B52	AT1G74560	Control	NON_TF
#FFD602	AT1G10740	Control and Drought	NON_TF
#1E6B52	AT1G06690	Control	NON_TF
#1E6B52	AT1G07700	Control	NON_TF
#1E6B52	AT4G37460	Control	NON_TF
#1E6B52	AT5G15600	Control	NON_TF
#1E6B52	AT2G23420	Control	NON_TF
#1E6B52	AT5G13170	Control	NON_TF
#1E6B52	AT4G26150	Control	TF
#FFD602	AT4G35250	Control and Drought	NON_TF
#1E6B52	AT3G08620	Control	NON_TF
#A69363	AT1G77090	Drought	NON_TF
#A69363	AT1G60540	Drought	NON_TF
#A69363	AT5G53200	Drought	TF
#A69363	AT3G51750	Drought	NON_TF
#A69363	AT5G62130	Drought	NON_TF
#A69363	AT1G78580	Drought	NON_TF
#A69363	AT3G22540	Drought	NON_TF
#A69363	AT2G34720	Drought	TF
#FFD602	AT5G02840	Control and Drought	TF
#1E6B52	AT1G01490	Control	NON_TF
#A69363	AT2G35260	Drought	NON_TF
#A69363	AT4G12980	Drought	NON_TF
#FFD602	AT5G47390	Control and Drought	TF
#FFD602	AT4G22360	Control and Drought	TF
#FFD602	AT1G76110	Control and Drought	TF
#1E6B52	AT5G16120	Control	NON_TF
#A69363	AT2G38120	Drought	NON_TF
#FFD602	AT1G77920	Control and Drought	TF
#1E6B52	AT2G31400	Control	NON_TF
#1E6B52	AT1G31690	Control	NON_TF
#1E6B52	AT1G54220	Control	NON_TF
#1E6B52	AT5G05250	Control	NON_TF
#1E6B52	AT3G61920	Control	NON_TF
#FFD602	AT4G38460	Control and Drought	NON_TF
#1E6B52	AT5G58570	Control	NON_TF
#1E6B52	AT2G25110	Control	NON_TF
#1E6B52	AT3G09620	Control	NON_TF
#1E6B52	AT1G69440	Control	NON_TF
#1E6B52	AT3G13930	Control	NON_TF
#A69363	AT2G27920	Drought	NON_TF
#A69363	AT1G77020	Drought	NON_TF
#A69363	AT1G03475	Drought	NON_TF
#A69363	AT5G15770	Drought	TF
#A69363	AT2G05520	Drought	NON_TF
#A69363	AT4G37990	Drought	NON_TF
#A69363	AT5G52450	Drought	NON_TF
#A69363	AT1G25530	Drought	NON_TF
#A69363	AT2G34470	Drought	NON_TF
#A69363	AT4G16447	Drought	NON_TF
#FFD602	AT1G64620	Control and Drought	TF
#1E6B52	AT5G18930	Control	NON_TF
#A69363	AT4G23850	Drought	NON_TF
#A69363	AT5G56160	Drought	NON_TF
#FFD602	AT1G29160	Control and Drought	TF
#1E6B52	AT3G42670	Control	TF
#A69363	AT1G07880	Drought	NON_TF
#1E6B52	AT4G01090	Control	NON_TF
#1E6B52	AT4G17080	Control	NON_TF
#A69363	AT2G24790	Drought	TF
#A69363	AT1G75470	Drought	NON_TF
#A69363	AT5G62020	Drought	TF
#FFD602	AT2G03340	Control and Drought	TF
#1E6B52	AT3G18440	Control	NON_TF
#1E6B52	AT4G04910	Control	NON_TF
#1E6B52	AT1G69740	Control	NON_TF
#1E6B52	AT3G60860	Control	NON_TF
#A69363	AT3G15360	Drought	NON_TF
#A69363	AT5G26880	Drought	NON_TF
#A69363	AT2G33630	Drought	NON_TF
#A69363	AT4G04330	Drought	NON_TF
#A69363	AT4G16710	Drought	NON_TF
#A69363	AT1G02560	Drought	NON_TF
#A69363	AT4G17486	Drought	NON_TF
#FFD602	AT2G46830	Control and Drought	TF
#1E6B52	AT5G57550	Control	NON_TF
#A69363	AT2G47770	Drought	NON_TF
#A69363	AT1G76600	Drought	NON_TF
#A69363	AT4G24380	Drought	NON_TF
#1E6B52	AT3G11280	Control	TF
#1E6B52	AT4G31310	Control	NON_TF
#1E6B52	AT5G64460	Control	NON_TF
#1E6B52	AT2G41120	Control	NON_TF
#FFD602	AT1G19000	Control and Drought	TF
#1E6B52	AT2G21185	Control	NON_TF
#1E6B52	AT2G26710	Control	NON_TF
#1E6B52	AT1G15290	Control	NON_TF
#1E6B52	AT2G46030	Control	NON_TF
#FFD602	AT4G33666	Control and Drought	NON_TF
#A69363	AT1G48260	Drought	NON_TF
#A69363	AT1G22290	Drought	NON_TF
#A69363	AT5G03130	Drought	NON_TF
#A69363	AT1G20640	Drought	TF
#A69363	AT5G48490	Drought	NON_TF
#FFD602	AT3G04070	Control and Drought	TF
#1E6B52	AT3G01420	Control	NON_TF
#1E6B52	AT4G13660	Control	NON_TF
#A69363	AT3G13670	Drought	NON_TF
#A69363	AT5G20950	Drought	NON_TF
#FFD602	AT4G36760	Control and Drought	NON_TF
#A69363	AT1G73790	Drought	NON_TF
#A69363	AT1G72680	Drought	NON_TF
#1E6B52	AT5G53490	Control	NON_TF
#1E6B52	AT1G21670	Control	NON_TF
#1E6B52	AT4G16155	Control	NON_TF
#1E6B52	AT1G09750	Control	NON_TF
#1E6B52	AT3G32930	Control	NON_TF
#1E6B52	AT5G03460	Control	NON_TF
#1E6B52	AT1G21680	Control	NON_TF
#FFD602	AT4G09020	Control and Drought	NON_TF
#FFD602	AT1G22070	Control and Drought	NON_TF
#FFD602	AT2G42520	Control and Drought	NON_TF
#FFD602	AT3G12490	Control and Drought	NON_TF
#1E6B52	AT4G35480	Control	NON_TF
#A69363	AT1G57540	Drought	NON_TF
#A69363	AT1G75800	Drought	NON_TF
#A69363	AT1G22370	Drought	NON_TF
#A69363	AT1G22740	Drought	NON_TF
#A69363	AT3G62660	Drought	NON_TF
#A69363	AT2G42790	Drought	NON_TF
#A69363	AT2G40940	Drought	NON_TF
#1E6B52	AT4G16190	Control	NON_TF
#1E6B52	AT1G70890	Control	NON_TF
#1E6B52	AT3G53950	Control	NON_TF
#1E6B52	AT2G15830	Control	NON_TF
#1E6B52	AT1G53450	Control	NON_TF
#1E6B52	AT3G63160	Control	NON_TF
#1E6B52	AT1G18720	Control	NON_TF
#1E6B52	AT4G32340	Control	NON_TF
#A69363	AT2G25450	Drought	NON_TF
#A69363	AT3G63210	Drought	NON_TF
#1E6B52	AT5G14550	Control	NON_TF
#1E6B52	AT3G18930	Control	NON_TF
#FFD602	AT4G27450	Control and Drought	NON_TF
#A69363	AT1G72820	Drought	NON_TF
#A69363	AT2G46710	Drought	NON_TF
#FFD602	AT3G47500	Control and Drought	TF
#1E6B52	AT5G44190	Control	TF
#A69363	AT5G48900	Drought	NON_TF
#A69363	AT4G14900	Drought	NON_TF
#A69363	AT5G58870	Drought	NON_TF
#A69363	AT5G13630	Drought	NON_TF
#A69363	AT5G64780	Drought	NON_TF
#FFD602	AT1G73870	Control and Drought	TF
#A69363	AT1G04250	Drought	TF
#1E6B52	AT2G30340	Control	TF
#1E6B52	AT1G65730	Control	NON_TF
#1E6B52	AT2G38860	Control	NON_TF
#1E6B52	AT5G20960	Control	NON_TF
#1E6B52	AT5G13420	Control	NON_TF
#1E6B52	AT5G64120	Control	NON_TF
#1E6B52	AT5G37260	Control	TF
#1E6B52	AT1G65480	Control	NON_TF
#1E6B52	AT5G39610	Control	TF
#1E6B52	AT2G34500	Control	NON_TF
#1E6B52	AT2G36080	Control	TF
#A69363	AT1G68410	Drought	NON_TF
#A69363	AT4G32460	Drought	NON_TF
#A69363	AT4G25810	Drought	NON_TF
#A69363	AT4G31000	Drought	NON_TF
#A69363	AT3G61640	Drought	NON_TF
#A69363	AT4G13050	Drought	NON_TF
#A69363	AT5G20230	Drought	NON_TF
#A69363	AT5G24580	Drought	NON_TF
#A69363	AT5G25170	Drought	NON_TF
#A69363	AT3G28340	Drought	NON_TF
#A69363	AT3G62720	Drought	NON_TF
#A69363	AT5G19820	Drought	NON_TF
#A69363	AT3G24530	Drought	NON_TF
#1E6B52	AT2G25000	Control	TF
#1E6B52	AT1G17860	Control	NON_TF
#1E6B52	AT3G26210	Control	NON_TF
#1E6B52	AT2G43510	Control	NON_TF
#A69363	AT5G26340	Drought	NON_TF
#1E6B52	AT5G13090	Control	NON_TF
#A69363	AT5G24930	Drought	TF
#1E6B52	AT1G10140	Control	NON_TF
#1E6B52	AT1G51140	Control	TF
#1E6B52	AT3G55710	Control	NON_TF
#1E6B52	AT3G02690	Control	NON_TF
#1E6B52	AT5G38980	Control	NON_TF
#1E6B52	AT1G06240	Control	NON_TF
#1E6B52	AT2G20830	Control	NON_TF
#1E6B52	AT1G48030	Control	NON_TF
#1E6B52	AT2G39470	Control	NON_TF
#1E6B52	AT2G20340	Control	NON_TF
#1E6B52	AT1G78020	Control	NON_TF
#1E6B52	AT5G58260	Control	NON_TF
#1E6B52	AT1G01790	Control	NON_TF
#1E6B52	AT4G35290	Control	NON_TF
#1E6B52	AT4G37080	Control	NON_TF
#FFD602	AT1G70000	Control and Drought	TF
#FFD602	AT2G21330	Control and Drought	NON_TF
#1E6B52	AT4G35090	Control	NON_TF
#A69363	AT2G26590	Drought	NON_TF
#1E6B52	AT3G11020	Control	TF
#FFD602	AT1G21910	Control and Drought	TF
#1E6B52	AT2G30040	Control	NON_TF
#A69363	AT1G04040	Drought	NON_TF
#A69363	AT2G40330	Drought	NON_TF
#FFD602	AT4G00050	Control and Drought	TF
#1E6B52	AT2G04039	Control	NON_TF
#1E6B52	AT3G51240	Control	NON_TF
#FFD602	AT1G08860	Control and Drought	NON_TF
#A69363	AT4G27657	Drought	NON_TF
#A69363	AT1G15430	Drought	NON_TF
#FFD602	AT2G35930	Control and Drought	NON_TF
#FFD602	AT3G10420	Control and Drought	NON_TF
#1E6B52	AT1G06430	Control	NON_TF
#1E6B52	AT5G15450	Control	NON_TF
#1E6B52	AT4G25480	Control	TF
#1E6B52	AT1G29395	Control	NON_TF
#FFD602	AT1G30210	Control and Drought	TF
#A69363	AT3G52180	Drought	NON_TF
#A69363	AT4G33540	Drought	NON_TF
#A69363	AT4G01130	Drought	NON_TF
#A69363	AT1G71800	Drought	NON_TF
#FFD602	AT5G13730	Control and Drought	TF
#A69363	AT2G31040	Drought	NON_TF
#A69363	AT2G41705	Drought	NON_TF
#1E6B52	AT5G11260	Control	TF
#1E6B52	AT1G78510	Control	NON_TF
#FFD602	AT1G53230	Control and Drought	TF
#FFD602	AT5G59020	Control and Drought	NON_TF
#1E6B52	AT5G66530	Control	NON_TF
#1E6B52	AT3G16250	Control	NON_TF
#1E6B52	AT3G45050	Control	NON_TF
#1E6B52	AT5G39210	Control	NON_TF
#A69363	AT4G29080	Drought	TF
#FFD602	AT2G01930	Control and Drought	TF
#1E6B52	AT2G42190	Control	NON_TF
#1E6B52	AT5G04040	Control	NON_TF
#1E6B52	AT1G01620	Control	NON_TF
#A69363	AT2G27050	Drought	TF
#FFD602	AT4G01280	Control and Drought	TF
#A69363	AT1G15590	Drought	NON_TF
#A69363	AT4G30960	Drought	NON_TF
#A69363	AT2G39450	Drought	NON_TF
#FFD602	AT3G23250	Control and Drought	TF
#1E6B52	AT5G46050	Control	NON_TF
#1E6B52	AT2G44380	Control	NON_TF
#FFD602	AT2G18450	Control and Drought	NON_TF
#A69363	AT4G20860	Drought	NON_TF
#A69363	AT1G08050	Drought	NON_TF
#A69363	AT3G48720	Drought	NON_TF
#A69363	AT3G55500	Drought	NON_TF
#A69363	AT4G17230	Drought	TF
#A69363	AT2G02860	Drought	NON_TF
#A69363	AT1G65390	Drought	NON_TF
#A69363	AT3G50910	Drought	NON_TF
#A69363	AT4G31550	Drought	TF
#A69363	AT1G51660	Drought	NON_TF
#A69363	AT3G63010	Drought	NON_TF
#FFD602	AT3G23210	Control and Drought	TF
#1E6B52	AT5G12470	Control	NON_TF
#1E6B52	AT1G21000	Control	TF
#1E6B52	AT5G24210	Control	NON_TF
#1E6B52	AT2G22300	Control	TF
#1E6B52	AT5G08330	Control	TF
#FFD602	AT1G49010	Control and Drought	TF
#1E6B52	AT1G08570	Control	NON_TF
#1E6B52	AT3G28270	Control	NON_TF
#1E6B52	AT4G10120	Control	NON_TF
#A69363	AT1G78180	Drought	NON_TF
#A69363	AT5G07240	Drought	NON_TF
#A69363	AT4G28270	Drought	NON_TF
#A69363	AT2G28400	Drought	NON_TF
#1E6B52	AT5G18830	Control	TF
#1E6B52	AT5G24380	Control	NON_TF
#FFD602	AT4G34590	Control and Drought	TF
#FFD602	AT1G79110	Control and Drought	NON_TF
#1E6B52	AT4G30350	Control	NON_TF
#A69363	AT4G36910	Drought	NON_TF
#A69363	AT1G53280	Drought	NON_TF
#A69363	AT1G79410	Drought	NON_TF
#A69363	AT4G30890	Drought	NON_TF
#A69363	AT4G17090	Drought	NON_TF
#FFD602	AT1G62300	Control and Drought	TF
#1E6B52	AT1G51790	Control	NON_TF
#A69363	AT1G70140	Drought	NON_TF
#A69363	AT1G09970	Drought	NON_TF
#A69363	AT1G03370	Drought	NON_TF
#1E6B52	AT2G43000	Control	TF
#1E6B52	AT1G75040	Control	NON_TF
#1E6B52	AT5G45380	Control	NON_TF
#1E6B52	AT2G32680	Control	NON_TF
#1E6B52	AT4G04490	Control	NON_TF
#1E6B52	AT1G77200	Control	TF
#1E6B52	AT5G03590	Control	NON_TF
#1E6B52	AT4G30060	Control	NON_TF
#A69363	AT4G23630	Drought	NON_TF
#A69363	AT5G62070	Drought	NON_TF
#A69363	AT2G44970	Drought	NON_TF
#A69363	AT3G50260	Drought	TF
#A69363	AT3G51890	Drought	NON_TF
#A69363	AT1G05170	Drought	NON_TF
#A69363	AT3G25780	Drought	NON_TF
#A69363	AT3G46450	Drought	NON_TF
#A69363	AT1G20070	Drought	NON_TF
#A69363	AT4G30470	Drought	NON_TF
#A69363	AT4G28140	Drought	TF
#A69363	AT1G27760	Drought	NON_TF
#A69363	AT5G52660	Drought	TF
#A69363	AT1G61340	Drought	NON_TF
#A69363	AT5G41900	Drought	NON_TF
#A69363	AT4G30340	Drought	NON_TF
#A69363	AT5G57050	Drought	NON_TF
#A69363	AT5G14700	Drought	NON_TF
#A69363	AT4G24960	Drought	NON_TF
#A69363	AT1G69260	Drought	NON_TF
#A69363	AT3G44720	Drought	NON_TF
#A69363	AT1G20450	Drought	NON_TF
#A69363	AT2G22010	Drought	NON_TF
#A69363	AT4G17550	Drought	NON_TF
#A69363	AT4G00360	Drought	NON_TF
#A69363	AT1G74430	Drought	TF
#A69363	AT1G20823	Drought	NON_TF
#A69363	AT1G18890	Drought	NON_TF
#A69363	AT3G48090	Drought	NON_TF
#A69363	AT2G39250	Drought	TF
#A69363	AT1G19020	Drought	NON_TF
#A69363	AT5G58160	Drought	NON_TF
#A69363	AT3G27270	Drought	NON_TF
#A69363	AT4G18170	Drought	TF
#A69363	AT2G20370	Drought	NON_TF
#A69363	AT4G18010	Drought	NON_TF
#A69363	AT5G19875	Drought	NON_TF
#A69363	AT3G21890	Drought	TF
#A69363	AT2G35710	Drought	NON_TF
#A69363	AT4G23220	Drought	NON_TF
#A69363	AT1G64380	Drought	TF
#A69363	AT3G21220	Drought	NON_TF
#A69363	AT1G78070	Drought	NON_TF
#A69363	AT3G57540	Drought	NON_TF
#A69363	AT3G54950	Drought	NON_TF
#A69363	AT4G11330	Drought	NON_TF
#A69363	AT1G21380	Drought	NON_TF
#A69363	AT4G34410	Drought	TF
#A69363	AT4G38810	Drought	NON_TF
#A69363	AT2G25490	Drought	NON_TF
#A69363	AT5G48655	Drought	NON_TF
#A69363	AT1G56600	Drought	NON_TF
#A69363	AT1G09350	Drought	NON_TF
#A69363	AT5G54470	Drought	TF
#1E6B52	AT3G17609	Control	TF
#FFD602	AT5G47230	Control and Drought	TF
#FFD602	AT2G37430	Control and Drought	TF
#1E6B52	AT4G10270	Control	NON_TF
#1E6B52	AT1G72060	Control	NON_TF
#1E6B52	AT5G06860	Control	NON_TF
#1E6B52	AT5G22890	Control	TF
#1E6B52	AT1G78000	Control	NON_TF
#1E6B52	AT4G01550	Control	TF
#1E6B52	AT1G20630	Control	NON_TF
#1E6B52	AT4G23270	Control	NON_TF
#FFD602	AT4G18390	Control and Drought	TF
#1E6B52	AT1G75820	Control	NON_TF
#A69363	AT4G03400	Drought	NON_TF
#FFD602	AT5G13180	Control and Drought	TF
#1E6B52	AT5G35460	Control	NON_TF
#1E6B52	AT1G69160	Control	NON_TF
#A69363	AT1G62510	Drought	NON_TF
#A69363	AT2G45190	Drought	TF
#A69363	AT3G50750	Drought	TF
#1E6B52	AT1G29280	Control	TF
#1E6B52	AT5G64100	Control	NON_TF
#1E6B52	AT1G55110	Control	TF
#1E6B52	AT5G51670	Control	NON_TF
#FFD602	AT4G01720	Control and Drought	TF
#A69363	AT5G11090	Drought	NON_TF
#FFD602	AT2G43010	Control and Drought	TF
#1E6B52	AT5G19140	Control	NON_TF
#1E6B52	AT1G52220	Control	NON_TF
#A69363	AT3G06780	Drought	NON_TF
#1E6B52	AT3G59060	Control	TF
#A69363	AT5G57220	Drought	NON_TF
#FFD602	AT5G49330	Control and Drought	TF
#1E6B52	AT1G30530	Control	NON_TF
#A69363	AT1G65060	Drought	NON_TF
#1E6B52	AT2G01940	Control	TF
#1E6B52	AT4G04955	Control	NON_TF
#FFD602	AT4G23750	Control and Drought	TF
#1E6B52	AT3G19680	Control	NON_TF
#A69363	AT4G39990	Drought	NON_TF
#A69363	AT5G35620	Drought	NON_TF
#A69363	AT3G61190	Drought	NON_TF
#FFD602	AT1G72050	Control and Drought	TF
#1E6B52	AT4G35510	Control	NON_TF
#A69363	AT2G40360	Drought	NON_TF
#A69363	AT3G18600	Drought	NON_TF
#A69363	AT3G29200	Drought	NON_TF
#A69363	AT1G04170	Drought	NON_TF
#A69363	AT4G35950	Drought	NON_TF
#FFD602	AT5G60850	Control and Drought	TF
#1E6B52	AT2G47450	Control	NON_TF
#A69363	AT4G11220	Drought	NON_TF
#A69363	AT3G54030	Drought	NON_TF
#A69363	AT4G21060	Drought	NON_TF
#1E6B52	AT1G27360	Control	TF
#1E6B52	AT4G36470	Control	NON_TF
#1E6B52	AT5G46830	Control	TF
#1E6B52	AT5G45950	Control	NON_TF
#1E6B52	AT1G34370	Control	TF
#FFD602	AT1G62310	Control and Drought	TF
#1E6B52	AT3G21060	Control	NON_TF
#A69363	AT3G52240	Drought	NON_TF
#1E6B52	AT2G37630	Control	TF
#1E6B52	AT1G32240	Control	TF
#FFD602	AT2G22540	Control and Drought	TF
#1E6B52	AT5G01530	Control	NON_TF
#A69363	AT2G23840	Drought	NON_TF
#A69363	AT1G71030	Drought	TF
#A69363	AT3G23080	Drought	NON_TF
#A69363	AT3G45780	Drought	NON_TF
#FFD602	AT5G24110	Control and Drought	TF
#A69363	AT2G18690	Drought	NON_TF
#A69363	AT1G16420	Drought	NON_TF
#A69363	AT1G01480	Drought	NON_TF
#A69363	AT4G29740	Drought	NON_TF
#A69363	AT1G76970	Drought	NON_TF
#1E6B52	AT3G27785	Control	TF
#1E6B52	AT4G13790	Control	NON_TF
#1E6B52	AT3G01140	Control	TF
#1E6B52	AT1G30260	Control	NON_TF
#A69363	AT1G31630	Drought	TF
#A69363	AT5G66850	Drought	NON_TF
#A69363	AT1G71950	Drought	NON_TF
#A69363	AT1G78210	Drought	NON_TF
#A69363	AT3G14050	Drought	NON_TF
#A69363	AT1G51820	Drought	NON_TF
#A69363	AT1G56060	Drought	NON_TF
#A69363	AT4G28490	Drought	NON_TF
#A69363	AT5G60890	Drought	TF
#A69363	AT4G31750	Drought	NON_TF
#A69363	AT2G37110	Drought	NON_TF
#A69363	AT5G13200	Drought	NON_TF
#A69363	AT5G56980	Drought	NON_TF
#A69363	AT5G54860	Drought	NON_TF
#A69363	AT2G32190	Drought	NON_TF
#A69363	AT1G05100	Drought	NON_TF
#A69363	AT5G09800	Drought	NON_TF
#A69363	AT4G35985	Drought	NON_TF
#A69363	AT1G28480	Drought	NON_TF
#A69363	AT5G17000	Drought	NON_TF
#A69363	AT4G18950	Drought	NON_TF
#A69363	AT4G37370	Drought	NON_TF
#A69363	AT4G36900	Drought	TF
#A69363	AT3G53600	Drought	TF
#A69363	AT5G52050	Drought	NON_TF
#A69363	AT1G28380	Drought	NON_TF
#A69363	AT5G48530	Drought	NON_TF
#A69363	AT1G14540	Drought	NON_TF
#A69363	AT1G07630	Drought	NON_TF
#A69363	AT3G49350	Drought	NON_TF
#A69363	AT2G43320	Drought	NON_TF
#A69363	AT3G02840	Drought	NON_TF
#A69363	AT1G55450	Drought	NON_TF
#A69363	AT3G08720	Drought	NON_TF
#A69363	AT4G05100	Drought	TF
#A69363	AT1G27910	Drought	NON_TF
#A69363	AT1G01560	Drought	NON_TF
#A69363	AT1G04220	Drought	NON_TF
#A69363	AT3G55840	Drought	NON_TF
#A69363	AT3G05650	Drought	NON_TF
#A69363	AT1G58420	Drought	NON_TF
#A69363	AT1G01260	Drought	TF
#A69363	AT3G05500	Drought	NON_TF
#A69363	AT3G25250	Drought	NON_TF
#A69363	AT3G21700	Drought	NON_TF
#A69363	AT3G24350	Drought	NON_TF
#A69363	AT5G12010	Drought	NON_TF
#A69363	AT1G64390	Drought	NON_TF
#A69363	AT4G39670	Drought	NON_TF
#A69363	AT2G28550	Drought	TF
#A69363	AT5G53750	Drought	NON_TF
#A69363	AT1G35230	Drought	NON_TF
#A69363	AT3G25180	Drought	NON_TF
#A69363	AT5G52320	Drought	NON_TF
#A69363	AT1G80820	Drought	NON_TF
#A69363	AT1G27930	Drought	NON_TF
#A69363	AT1G66350	Drought	TF
#A69363	AT2G01060	Drought	TF
#A69363	AT1G28320	Drought	NON_TF
#A69363	AT1G26670	Drought	NON_TF
#A69363	AT2G17640	Drought	NON_TF
#A69363	AT1G65720	Drought	NON_TF
#A69363	AT4G35750	Drought	NON_TF
#A69363	AT5G37540	Drought	NON_TF
#A69363	AT4G26080	Drought	NON_TF
#A69363	AT1G76380	Drought	NON_TF
#A69363	AT1G10560	Drought	NON_TF
#A69363	AT1G69270	Drought	NON_TF
#A69363	AT5G62920	Drought	TF
#A69363	AT3G46560	Drought	NON_TF
#A69363	AT5G62440	Drought	NON_TF
#A69363	AT1G43160	Drought	TF
#A69363	AT4G34710	Drought	NON_TF
#A69363	AT3G17810	Drought	NON_TF
#A69363	AT1G06620	Drought	NON_TF
#A69363	AT5G19110	Drought	NON_TF
#A69363	AT3G12910	Drought	TF
#A69363	AT1G26220	Drought	TF
#A69363	AT2G27310	Drought	NON_TF
#A69363	AT5G66730	Drought	TF
#A69363	AT5G44670	Drought	NON_TF
#A69363	AT3G63120	Drought	NON_TF
#A69363	AT2G41040	Drought	NON_TF
#A69363	AT2G40890	Drought	NON_TF
#A69363	AT5G50100	Drought	NON_TF
#A69363	AT1G19450	Drought	NON_TF
#A69363	AT2G36870	Drought	NON_TF
#A69363	AT3G10050	Drought	NON_TF
#A69363	AT2G23340	Drought	TF
#A69363	AT1G01610	Drought	NON_TF
#A69363	AT1G53910	Drought	TF
#A69363	AT5G01210	Drought	NON_TF
#A69363	AT2G42530	Drought	NON_TF
#A69363	AT3G55760	Drought	NON_TF
#A69363	AT2G42040	Drought	TF
#A69363	AT1G19740	Drought	NON_TF
#A69363	AT3G12250	Drought	TF
#A69363	AT1G13910	Drought	NON_TF
#A69363	AT5G44210	Drought	TF
#A69363	AT1G33590	Drought	NON_TF
#A69363	AT5G57710	Drought	NON_TF
#A69363	AT2G47070	Drought	TF
#A69363	AT4G30850	Drought	NON_TF
#A69363	AT3G02880	Drought	NON_TF
#A69363	AT2G02450	Drought	TF
#A69363	AT5G61960	Drought	NON_TF
#A69363	AT2G36590	Drought	NON_TF
#A69363	AT3G56260	Drought	NON_TF
#A69363	AT3G29360	Drought	NON_TF
#A69363	AT5G24590	Drought	TF
#A69363	AT3G49690	Drought	TF
#A69363	AT2G43945	Drought	NON_TF
#A69363	AT2G45680	Drought	TF
#A69363	AT4G20170	Drought	NON_TF
#A69363	AT2G02080	Drought	TF
#A69363	AT3G13062	Drought	NON_TF
#A69363	AT5G18630	Drought	NON_TF
#A69363	AT3G26510	Drought	NON_TF
#A69363	AT3G61890	Drought	TF
#A69363	AT3G50410	Drought	TF
#A69363	AT4G12790	Drought	NON_TF
#A69363	AT2G33480	Drought	TF
#A69363	AT5G53880	Drought	NON_TF
#A69363	AT2G35940	Drought	TF
#A69363	AT2G29450	Drought	NON_TF
#A69363	AT3G14340	Drought	NON_TF
#A69363	AT1G52880	Drought	TF
#A69363	AT3G15270	Drought	TF
#A69363	AT1G69970	Drought	NON_TF
#A69363	AT4G18880	Drought	TF
#A69363	AT2G45660	Drought	TF
#A69363	AT1G58360	Drought	NON_TF
#A69363	AT4G35060	Drought	NON_TF
#A69363	AT5G32440	Drought	NON_TF
#A69363	AT4G15920	Drought	NON_TF
#A69363	AT4G27710	Drought	NON_TF
#A69363	AT4G12030	Drought	NON_TF
#A69363	AT1G49480	Drought	TF
#A69363	AT5G50420	Drought	NON_TF
#A69363	AT1G14720	Drought	NON_TF
#A69363	AT3G11590	Drought	NON_TF
#A69363	AT4G33500	Drought	NON_TF
#A69363	AT1G71450	Drought	TF
#A69363	AT5G47380	Drought	NON_TF
#A69363	AT5G46590	Drought	TF
#A69363	AT4G18540	Drought	NON_TF
#A69363	AT3G23690	Drought	TF
#A69363	AT3G14180	Drought	TF
#A69363	AT5G04170	Drought	NON_TF
#A69363	AT5G05790	Drought	TF
#A69363	AT5G05210	Drought	NON_TF
#A69363	AT5G06839	Drought	TF
#A69363	AT1G74110	Drought	NON_TF
#A69363	AT2G19500	Drought	NON_TF
#A69363	AT1G69010	Drought	TF
#A69363	AT1G06570	Drought	NON_TF
#A69363	AT5G43150	Drought	NON_TF
#A69363	AT3G21175	Drought	TF
#A69363	AT1G68100	Drought	NON_TF
#A69363	AT5G49650	Drought	NON_TF
#A69363	AT1G06210	Drought	NON_TF
#A69363	AT1G06160	Drought	TF
#A69363	AT5G44420	Drought	NON_TF
#A69363	AT4G13510	Drought	NON_TF
#A69363	AT4G16110	Drought	TF
#A69363	AT3G04060	Drought	TF
#A69363	AT3G15220	Drought	NON_TF
#A69363	AT3G28910	Drought	TF
#A69363	AT4G24240	Drought	TF
#A69363	AT1G34190	Drought	TF
#A69363	AT5G18850	Drought	NON_TF
#A69363	AT1G13450	Drought	TF
#A69363	AT1G72150	Drought	NON_TF
#A69363	AT3G60740	Drought	NON_TF
#A69363	AT5G67580	Drought	TF
#A69363	AT2G16750	Drought	NON_TF
#A69363	AT1G19050	Drought	TF
#A69363	AT2G37120	Drought	TF
#A69363	AT4G14070	Drought	NON_TF
#A69363	AT2G28570	Drought	NON_TF
#A69363	AT1G12610	Drought	TF
#A69363	AT1G43700	Drought	TF
#A69363	AT4G31410	Drought	NON_TF
#A69363	AT1G55330	Drought	NON_TF
#A69363	AT3G10030	Drought	TF
#A69363	AT2G28200	Drought	TF
#A69363	AT5G46790	Drought	NON_TF
#A69363	AT4G38620	Drought	TF
#A69363	AT4G01660	Drought	NON_TF
#A69363	AT2G24570	Drought	TF
#A69363	AT2G46680	Drought	TF
#A69363	AT3G05830	Drought	NON_TF
#A69363	AT4G30080	Drought	TF
#A69363	AT1G49970	Drought	NON_TF
#A69363	AT1G06180	Drought	TF
#A69363	AT1G29880	Drought	NON_TF
#A69363	AT2G45420	Drought	TF
#A69363	AT5G61710	Drought	NON_TF
#A69363	AT3G47620	Drought	TF
#A69363	AT3G13750	Drought	NON_TF
#A69363	AT5G07700	Drought	TF
#A69363	AT5G23010	Drought	NON_TF
#A69363	AT1G68320	Drought	TF
#A69363	AT1G21140	Drought	NON_TF
#A69363	AT5G25390	Drought	TF
#A69363	AT3G09470	Drought	NON_TF
#A69363	AT2G40260	Drought	TF
#A69363	AT5G51020	Drought	NON_TF
#A69363	AT5G46760	Drought	TF
#A69363	AT2G23320	Drought	TF
#A69363	AT2G44940	Drought	TF
#A69363	AT4G25470	Drought	TF
#A69363	AT3G60530	Drought	TF

## Sheet: Shoot Control Salt CERN
			color	name	Net	TF
			#FFD602	AT5G67300	Control and Salt	TF
			#1E6B52	AT1G19770	Control	NON_TF
			#1E6B52	AT4G32030	Control	NON_TF
			#1E6B52	AT4G19420	Control	NON_TF
			#1E6B52	AT1G32920	Control	NON_TF
			#FFD602	AT4G25620	Control and Salt	NON_TF
			#1E6B52	AT1G11380	Control	NON_TF
			#1E6B52	AT1G35350	Control	NON_TF
			#1E6B52	AT1G10020	Control	NON_TF
			#1E6B52	AT3G49790	Control	NON_TF
			#1E6B52	AT4G36030	Control	NON_TF
			#1E6B52	AT2G44500	Control	NON_TF
			#1E6B52	AT3G50060	Control	TF
			#1E6B52	AT1G59910	Control	NON_TF
			#1E6B52	AT3G06070	Control	NON_TF
			#FFD602	AT1G72450	Control and Salt	TF
			#1E6B52	AT2G27080	Control	NON_TF
			#1E6B52	AT5G43190	Control	NON_TF
			#1E6B52	AT4G29780	Control	NON_TF
			#1E6B52	AT2G41640	Control	NON_TF
			#FFD602	AT4G01950	Control and Salt	NON_TF
			#1E6B52	AT4G37240	Control	NON_TF
			#1E6B52	AT3G14090	Control	NON_TF
			#FFD602	AT3G06750	Control and Salt	NON_TF
			#1E6B52	AT4G30440	Control	NON_TF
			#1E6B52	AT1G36370	Control	NON_TF
			#1E6B52	AT3G52400	Control	NON_TF
			#1E6B52	AT2G32800	Control	NON_TF
			#1E6B52	AT5G42050	Control	NON_TF
			#FFD602	AT3G06080	Control and Salt	NON_TF
			#1E6B52	AT2G17550	Control	NON_TF
			#1E6B52	AT2G30930	Control	NON_TF
			#1E6B52	AT4G29950	Control	NON_TF
			#1E6B52	AT4G10925	Control	NON_TF
			#1E6B52	AT3G05200	Control	NON_TF
			#FFD602	AT5G04720	Control and Salt	NON_TF
			#1E6B52	AT1G09070	Control	NON_TF
			#1E6B52	AT1G27100	Control	NON_TF
			#FFD602	AT5G25190	Control and Salt	TF
			#1E6B52	AT4G37540	Control	TF
			#1E6B52	AT5G04760	Control	TF
			#1E6B52	AT4G20820	Control	NON_TF
			#1E6B52	AT1G73830	Control	TF
			#FFD602	AT2G23290	Control and Salt	TF
			#FFD602	AT2G18700	Control and Salt	NON_TF
			#1E6B52	AT3G56880	Control	NON_TF
			#1E6B52	AT5G37710	Control	NON_TF
			#1E6B52	AT1G70740	Control	NON_TF
			#1E6B52	AT3G04640	Control	NON_TF
			#1E6B52	AT3G59080	Control	NON_TF
			#1E6B52	AT5G46710	Control	TF
			#FFD602	AT4G18340	Control and Salt	NON_TF
			#1E6B52	AT1G02660	Control	NON_TF
			#FFD602	AT3G07340	Control and Salt	TF
			#1E6B52	AT4G35240	Control	NON_TF
			#1E6B52	AT5G02290	Control	NON_TF
			#FFD602	AT2G23810	Control and Salt	NON_TF
			#1E6B52	AT1G66180	Control	NON_TF
			#1E6B52	AT5G64260	Control	NON_TF
			#1E6B52	AT3G15210	Control	TF
			#1E6B52	AT2G01850	Control	NON_TF
			#1E6B52	AT1G28370	Control	TF
			#FFD602	AT1G76890	Control and Salt	TF
			#1E6B52	AT4G08950	Control	NON_TF
			#FFD602	AT3G18560	Control and Salt	NON_TF
			#1E6B52	AT3G15530	Control	NON_TF
			#A69363	AT1G56700	Salt	NON_TF
			#A69363	AT1G47128	Salt	NON_TF
			#A69363	AT1G41830	Salt	NON_TF
			#A69363	AT5G45280	Salt	NON_TF
			#A69363	AT5G52280	Salt	NON_TF
			#A69363	AT1G62290	Salt	NON_TF
			#A69363	AT4G11220	Salt	NON_TF
			#A69363	AT1G54100	Salt	NON_TF
			#A69363	AT1G54050	Salt	NON_TF
			#A69363	AT1G76670	Salt	NON_TF
			#A69363	AT3G43270	Salt	NON_TF
			#1E6B52	AT3G23250	Control	TF
			#1E6B52	AT5G46050	Control	NON_TF
			#1E6B52	AT2G44380	Control	NON_TF
			#FFD602	AT2G18450	Control and Salt	NON_TF
			#FFD602	AT1G49560	Control and Salt	TF
			#1E6B52	AT4G14230	Control	NON_TF
			#1E6B52	AT5G03940	Control	NON_TF
			#1E6B52	AT1G74680	Control	NON_TF
			#1E6B52	AT1G34130	Control	NON_TF
			#FFD602	AT1G10090	Control and Salt	NON_TF
			#1E6B52	AT1G20693	Control	TF
			#1E6B52	AT3G19400	Control	NON_TF
			#1E6B52	AT1G28230	Control	NON_TF
			#1E6B52	AT4G33490	Control	NON_TF
			#1E6B52	AT4G12590	Control	NON_TF
			#FFD602	AT2G04700	Control and Salt	NON_TF
			#1E6B52	AT4G19120	Control	NON_TF
			#1E6B52	AT3G46440	Control	NON_TF
			#1E6B52	AT3G19960	Control	NON_TF
			#1E6B52	AT5G03240	Control	NON_TF
			#1E6B52	AT2G46490	Control	NON_TF
			#FFD602	AT2G28720	Control and Salt	NON_TF
			#1E6B52	AT2G28840	Control	NON_TF
			#1E6B52	AT5G51570	Control	NON_TF
			#FFD602	AT1G10760	Control and Salt	NON_TF
			#1E6B52	AT5G08580	Control	NON_TF
			#1E6B52	AT2G47890	Control	TF
			#1E6B52	AT5G65620	Control	NON_TF
			#1E6B52	AT1G80480	Control	NON_TF
			#1E6B52	AT3G50500	Control	NON_TF
			#1E6B52	AT1G49230	Control	NON_TF
			#1E6B52	AT5G55230	Control	NON_TF
			#1E6B52	AT5G58600	Control	NON_TF
			#FFD602	AT5G39410	Control and Salt	NON_TF
			#FFD602	AT4G33670	Control and Salt	NON_TF
			#1E6B52	AT3G07320	Control	NON_TF
			#1E6B52	AT3G26740	Control	NON_TF
			#1E6B52	AT5G42420	Control	NON_TF
			#1E6B52	AT3G18420	Control	NON_TF
			#FFD602	AT3G49390	Control and Salt	NON_TF
			#1E6B52	AT2G27960	Control	NON_TF
			#1E6B52	AT1G79500	Control	NON_TF
			#FFD602	AT1G13930	Control and Salt	NON_TF
			#FFD602	AT3G09540	Control and Salt	NON_TF
			#1E6B52	AT2G22660	Control	NON_TF
			#1E6B52	AT5G27280	Control	NON_TF
			#1E6B52	AT5G58700	Control	NON_TF
			#1E6B52	AT4G11600	Control	NON_TF
			#1E6B52	AT4G25500	Control	NON_TF
			#1E6B52	AT4G12750	Control	NON_TF
			#1E6B52	AT3G50210	Control	NON_TF
			#1E6B52	AT1G28050	Control	TF
			#1E6B52	AT4G26670	Control	NON_TF
			#1E6B52	AT1G64890	Control	NON_TF
			#1E6B52	AT1G20696	Control	TF
			#FFD602	AT3G01310	Control and Salt	NON_TF
			#1E6B52	AT5G17190	Control	NON_TF
			#1E6B52	AT2G16600	Control	NON_TF
			#1E6B52	AT2G32810	Control	NON_TF
			#1E6B52	AT1G30360	Control	NON_TF
			#1E6B52	AT3G56720	Control	NON_TF
			#1E6B52	AT1G21750	Control	NON_TF
			#1E6B52	AT4G20430	Control	NON_TF
			#1E6B52	AT1G53035	Control	NON_TF
			#1E6B52	AT1G20620	Control	NON_TF
			#1E6B52	AT4G35300	Control	NON_TF
			#FFD602	AT1G47710	Control and Salt	NON_TF
			#FFD602	AT5G05200	Control and Salt	NON_TF
			#1E6B52	AT3G55260	Control	NON_TF
			#1E6B52	AT1G48370	Control	NON_TF
			#FFD602	AT1G66410	Control and Salt	NON_TF
			#1E6B52	AT3G12120	Control	NON_TF
			#1E6B52	AT4G38770	Control	NON_TF
			#1E6B52	AT3G63170	Control	NON_TF
			#1E6B52	AT5G46860	Control	NON_TF
			#1E6B52	AT1G56300	Control	NON_TF
			#FFD602	AT5G64860	Control and Salt	NON_TF
			#1E6B52	AT2G38670	Control	NON_TF
			#FFD602	AT3G53800	Control and Salt	NON_TF
			#1E6B52	AT5G41260	Control	NON_TF
			#1E6B52	AT5G57700	Control	NON_TF
			#FFD602	AT3G29320	Control and Salt	NON_TF
			#FFD602	AT5G36890	Control and Salt	NON_TF
			#1E6B52	AT5G18680	Control	TF
			#1E6B52	AT5G50375	Control	NON_TF
			#1E6B52	AT5G16380	Control	NON_TF
			#1E6B52	AT1G71695	Control	NON_TF
			#1E6B52	AT1G75960	Control	NON_TF
			#1E6B52	AT5G18525	Control	NON_TF
			#1E6B52	AT5G26570	Control	NON_TF
			#FFD602	AT1G05180	Control and Salt	NON_TF
			#1E6B52	AT1G71060	Control	NON_TF
			#FFD602	AT1G07420	Control and Salt	NON_TF
			#1E6B52	AT3G09250	Control	NON_TF
			#1E6B52	AT2G18170	Control	NON_TF
			#1E6B52	AT1G51090	Control	NON_TF
			#1E6B52	AT5G07960	Control	NON_TF
			#1E6B52	AT3G46970	Control	NON_TF
			#1E6B52	AT2G20270	Control	NON_TF
			#1E6B52	AT1G75190	Control	NON_TF
			#FFD602	AT2G40840	Control and Salt	NON_TF
			#FFD602	AT4G21960	Control and Salt	NON_TF
			#1E6B52	AT5G44730	Control	NON_TF
			#1E6B52	AT4G23040	Control	NON_TF
			#FFD602	AT5G66420	Control and Salt	NON_TF
			#1E6B52	AT5G10780	Control	NON_TF
			#1E6B52	AT1G08550	Control	NON_TF
			#1E6B52	AT2G45560	Control	NON_TF
			#1E6B52	AT3G17020	Control	NON_TF
			#1E6B52	AT2G01170	Control	NON_TF
			#1E6B52	AT4G15110	Control	NON_TF
			#FFD602	AT5G02860	Control and Salt	NON_TF
			#A69363	AT5G20280	Salt	NON_TF
			#A69363	AT5G61570	Salt	NON_TF
			#FFD602	AT2G18950	Control and Salt	NON_TF
			#A69363	AT5G48370	Salt	NON_TF
			#A69363	AT5G67490	Salt	NON_TF
			#A69363	AT1G53310	Salt	NON_TF
			#A69363	AT3G05520	Salt	NON_TF
			#A69363	AT4G02500	Salt	NON_TF
			#A69363	AT5G25070	Salt	NON_TF
			#A69363	AT3G48170	Salt	NON_TF
			#A69363	AT1G72700	Salt	NON_TF
			#A69363	AT1G10410	Salt	NON_TF
			#FFD602	AT5G17300	Control and Salt	TF
			#FFD602	AT4G15430	Control and Salt	NON_TF
			#1E6B52	AT2G41250	Control	NON_TF
			#1E6B52	AT1G17050	Control	NON_TF
			#1E6B52	AT3G26570	Control	NON_TF
			#FFD602	AT4G15530	Control and Salt	NON_TF
			#1E6B52	AT3G22420	Control	NON_TF
			#1E6B52	AT2G30490	Control	NON_TF
			#FFD602	AT3G02380	Control and Salt	TF
			#1E6B52	AT3G27350	Control	NON_TF
			#FFD602	AT1G02820	Control and Salt	NON_TF
			#1E6B52	AT5G47040	Control	NON_TF
			#1E6B52	AT3G01060	Control	NON_TF
			#1E6B52	AT3G18750	Control	NON_TF
			#1E6B52	AT2G24540	Control	NON_TF
			#1E6B52	AT2G41290	Control	NON_TF
			#FFD602	AT4G34000	Control and Salt	TF
			#1E6B52	AT1G50020	Control	NON_TF
			#1E6B52	AT1G16720	Control	NON_TF
			#1E6B52	AT4G22920	Control	NON_TF
			#1E6B52	AT1G79270	Control	NON_TF
			#1E6B52	AT4G39540	Control	NON_TF
			#FFD602	AT1G65870	Control and Salt	NON_TF
			#FFD602	AT1G73390	Control and Salt	NON_TF
			#1E6B52	AT1G26560	Control	NON_TF
			#FFD602	AT1G55960	Control and Salt	NON_TF
			#A69363	AT1G70410	Salt	NON_TF
			#A69363	AT1G76990	Salt	NON_TF
			#FFD602	AT2G04795	Control and Salt	NON_TF
			#A69363	AT1G16390	Salt	NON_TF
			#A69363	AT1G29660	Salt	NON_TF
			#FFD602	AT1G49840	Control and Salt	NON_TF
			#FFD602	AT1G33240	Control and Salt	TF
			#A69363	AT2G10940	Salt	NON_TF
			#A69363	AT5G04230	Salt	NON_TF
			#A69363	AT3G51870	Salt	NON_TF
			#A69363	AT1G32530	Salt	NON_TF
			#A69363	AT4G30110	Salt	NON_TF
			#FFD602	AT5G13100	Control and Salt	NON_TF
			#A69363	AT2G40400	Salt	NON_TF
			#A69363	AT2G27710	Salt	NON_TF
			#A69363	AT3G14770	Salt	NON_TF
			#A69363	AT1G55805	Salt	NON_TF
			#A69363	AT5G15210	Salt	TF
			#A69363	AT1G60010	Salt	NON_TF
			#A69363	AT4G39770	Salt	NON_TF
			#FFD602	AT3G19450	Control and Salt	NON_TF
			#A69363	AT1G07570	Salt	NON_TF
			#A69363	AT1G19450	Salt	NON_TF
			#A69363	AT5G44020	Salt	NON_TF
			#A69363	AT3G07565	Salt	NON_TF
			#A69363	AT5G43320	Salt	NON_TF
			#A69363	AT3G49160	Salt	NON_TF
			#A69363	AT3G13062	Salt	NON_TF
			#FFD602	AT4G02200	Control and Salt	NON_TF
			#A69363	AT3G13065	Salt	NON_TF
			#FFD602	AT4G19160	Control and Salt	NON_TF
			#FFD602	AT2G03730	Control and Salt	NON_TF
			#FFD602	AT5G15830	Control and Salt	TF
			#A69363	AT1G61900	Salt	NON_TF
			#A69363	AT5G56870	Salt	NON_TF
			#FFD602	AT5G18650	Control and Salt	NON_TF
			#A69363	AT2G38310	Salt	NON_TF
			#A69363	AT2G30520	Salt	NON_TF
			#FFD602	AT3G15850	Control and Salt	NON_TF
			#A69363	AT3G50560	Salt	NON_TF
			#A69363	AT1G21140	Salt	NON_TF
			#A69363	AT3G53260	Salt	NON_TF
			#FFD602	AT3G54510	Control and Salt	NON_TF
			#A69363	AT3G17330	Salt	NON_TF
			#A69363	AT3G13750	Salt	NON_TF
			#A69363	AT1G10470	Salt	TF
			#A69363	AT5G57020	Salt	NON_TF
			#A69363	AT1G02640	Salt	NON_TF
			#FFD602	AT1G32460	Control and Salt	NON_TF
			#A69363	AT2G24600	Salt	NON_TF
			#A69363	AT1G12500	Salt	NON_TF
			#A69363	AT2G37460	Salt	NON_TF
			#A69363	AT3G13000	Salt	NON_TF
			#A69363	AT5G20250	Salt	NON_TF
			#A69363	AT2G33310	Salt	TF
			#FFD602	AT3G57550	Control and Salt	NON_TF
			#A69363	AT3G48560	Salt	NON_TF
			#A69363	AT3G45730	Salt	NON_TF
			#A69363	AT2G06850	Salt	NON_TF
			#A69363	AT4G38680	Salt	TF
			#A69363	AT4G17870	Salt	NON_TF
			#A69363	AT4G25050	Salt	NON_TF
			#FFD602	AT5G47390	Control and Salt	TF
			#1E6B52	AT4G22360	Control	TF
			#FFD602	AT1G03610	Control and Salt	NON_TF
			#FFD602	AT1G74840	Control and Salt	TF
			#1E6B52	AT5G16120	Control	NON_TF
			#1E6B52	AT1G76110	Control	TF
			#A69363	AT2G02710	Salt	NON_TF
			#A69363	AT1G49500	Salt	NON_TF
			#A69363	AT1G80920	Salt	NON_TF
			#A69363	AT1G70590	Salt	NON_TF
			#FFD602	AT2G20180	Control and Salt	TF
			#1E6B52	AT5G02020	Control	NON_TF
			#FFD602	AT1G70290	Control and Salt	NON_TF
			#FFD602	AT4G27450	Control and Salt	NON_TF
			#FFD602	AT1G80440	Control and Salt	NON_TF
			#FFD602	AT2G26710	Control and Salt	NON_TF
			#FFD602	AT2G25900	Control and Salt	TF
			#FFD602	AT3G55560	Control and Salt	NON_TF
			#A69363	AT5G05440	Salt	NON_TF
			#FFD602	AT4G17460	Control and Salt	TF
			#A69363	AT2G40330	Salt	NON_TF
			#FFD602	AT1G03850	Control and Salt	NON_TF
			#FFD602	AT3G23030	Control and Salt	TF
			#1E6B52	AT2G32030	Control	TF
			#1E6B52	AT1G05575	Control	NON_TF
			#1E6B52	AT1G22190	Control	TF
			#FFD602	AT2G40000	Control and Salt	NON_TF
			#1E6B52	AT2G41410	Control	NON_TF
			#1E6B52	AT5G06320	Control	NON_TF
			#FFD602	AT1G68840	Control and Salt	TF
			#1E6B52	AT1G25560	Control	TF
			#1E6B52	AT1G70000	Control	TF
			#1E6B52	AT4G35090	Control	NON_TF
			#1E6B52	AT2G21330	Control	NON_TF
			#1E6B52	AT4G01720	Control	TF
			#FFD602	AT1G19380	Control and Salt	NON_TF
			#1E6B52	AT1G72060	Control	NON_TF
			#FFD602	AT1G51140	Control and Salt	TF
			#1E6B52	AT1G01790	Control	NON_TF
			#1E6B52	AT3G55710	Control	NON_TF
			#1E6B52	AT3G02690	Control	NON_TF
			#1E6B52	AT1G06240	Control	NON_TF
			#1E6B52	AT5G58260	Control	NON_TF
			#1E6B52	AT1G48030	Control	NON_TF
			#1E6B52	AT2G39470	Control	NON_TF
			#1E6B52	AT1G78020	Control	NON_TF
			#1E6B52	AT2G20830	Control	NON_TF
			#1E6B52	AT4G37080	Control	NON_TF
			#1E6B52	AT2G20340	Control	NON_TF
			#1E6B52	AT4G35290	Control	NON_TF
			#1E6B52	AT5G38980	Control	NON_TF
			#A69363	AT1G76180	Salt	NON_TF
			#A69363	AT1G03290	Salt	NON_TF
			#A69363	AT3G20250	Salt	NON_TF
			#A69363	AT2G46680	Salt	TF
			#A69363	AT4G14010	Salt	NON_TF
			#A69363	AT1G22160	Salt	NON_TF
			#1E6B52	AT2G02070	Control	TF
			#FFD602	AT4G17140	Control and Salt	NON_TF
			#FFD602	AT4G02370	Control and Salt	NON_TF
			#1E6B52	AT1G20840	Control	NON_TF
			#1E6B52	AT3G47800	Control	NON_TF
			#1E6B52	AT2G21130	Control	NON_TF
			#1E6B52	AT5G25210	Control	NON_TF
			#1E6B52	AT2G33830	Control	NON_TF
			#1E6B52	AT4G33980	Control	NON_TF
			#1E6B52	AT2G19450	Control	NON_TF
			#1E6B52	AT5G57110	Control	NON_TF
			#1E6B52	AT1G07280	Control	NON_TF
			#1E6B52	AT4G26660	Control	NON_TF
			#1E6B52	AT3G27210	Control	NON_TF
			#1E6B52	AT1G51610	Control	NON_TF
			#1E6B52	AT3G16180	Control	NON_TF
			#1E6B52	AT3G05800	Control	NON_TF
			#1E6B52	AT1G76590	Control	TF
			#1E6B52	AT1G06460	Control	NON_TF
			#1E6B52	AT4G39090	Control	NON_TF
			#1E6B52	AT5G50450	Control	NON_TF
			#1E6B52	AT3G51400	Control	NON_TF
			#1E6B52	AT5G11150	Control	NON_TF
			#1E6B52	AT5G41920	Control	TF
			#1E6B52	AT1G75140	Control	NON_TF
			#1E6B52	AT1G11210	Control	NON_TF
			#1E6B52	AT3G05220	Control	NON_TF
			#1E6B52	AT2G31870	Control	NON_TF
			#1E6B52	AT3G07640	Control	NON_TF
			#1E6B52	AT5G43060	Control	NON_TF
			#1E6B52	AT4G31050	Control	NON_TF
			#1E6B52	AT4G17490	Control	TF
			#1E6B52	AT1G23710	Control	NON_TF
			#1E6B52	AT3G25600	Control	NON_TF
			#1E6B52	AT2G30360	Control	NON_TF
			#1E6B52	AT3G19580	Control	TF
			#FFD602	AT5G47220	Control and Salt	TF
			#1E6B52	AT4G24570	Control	NON_TF
			#1E6B52	AT1G18570	Control	TF
			#1E6B52	AT3G16720	Control	NON_TF
			#FFD602	AT1G75020	Control and Salt	NON_TF
			#1E6B52	AT1G25400	Control	NON_TF
			#1E6B52	AT2G44130	Control	NON_TF
			#1E6B52	AT1G11050	Control	NON_TF
			#FFD602	AT5G46780	Control and Salt	NON_TF
			#FFD602	AT4G17500	Control and Salt	TF
			#1E6B52	AT1G73500	Control	NON_TF
			#FFD602	AT1G72520	Control and Salt	NON_TF
			#1E6B52	AT3G15500	Control	TF
			#FFD602	AT1G25550	Control and Salt	TF
			#1E6B52	AT5G56340	Control	NON_TF
			#FFD602	AT5G19120	Control and Salt	NON_TF
			#1E6B52	AT5G45110	Control	TF
			#1E6B52	AT4G28300	Control	NON_TF
			#1E6B52	AT5G45340	Control	NON_TF
			#1E6B52	AT3G52800	Control	NON_TF
			#1E6B52	AT1G55110	Control	TF
			#FFD602	AT1G27200	Control and Salt	NON_TF
			#1E6B52	AT5G51670	Control	NON_TF
			#FFD602	AT3G20310	Control and Salt	TF
			#1E6B52	AT2G41010	Control	NON_TF
			#1E6B52	AT3G12400	Control	NON_TF
			#1E6B52	AT5G58090	Control	NON_TF
			#1E6B52	AT5G13190	Control	NON_TF
			#1E6B52	AT5G58650	Control	NON_TF
			#FFD602	AT5G58430	Control and Salt	NON_TF
			#FFD602	AT1G69570	Control and Salt	TF
			#FFD602	AT5G28770	Control and Salt	TF
			#1E6B52	AT1G66130	Control	NON_TF
			#1E6B52	AT2G28305	Control	NON_TF
			#1E6B52	AT5G67440	Control	NON_TF
			#1E6B52	AT1G03590	Control	NON_TF
			#1E6B52	AT1G15550	Control	NON_TF
			#FFD602	AT5G22390	Control and Salt	NON_TF
			#1E6B52	AT5G16830	Control	NON_TF
			#1E6B52	AT4G34150	Control	NON_TF
			#FFD602	AT5G39660	Control and Salt	TF
			#1E6B52	AT1G68440	Control	NON_TF
			#1E6B52	AT2G43290	Control	NON_TF
			#1E6B52	AT5G47560	Control	NON_TF
			#1E6B52	AT3G62930	Control	NON_TF
			#FFD602	AT5G05860	Control and Salt	NON_TF
			#1E6B52	AT1G18460	Control	NON_TF
			#1E6B52	AT5G37770	Control	NON_TF
			#FFD602	AT3G57040	Control and Salt	TF
			#1E6B52	AT1G49780	Control	NON_TF
			#FFD602	AT5G62470	Control and Salt	TF
			#1E6B52	AT4G20380	Control	NON_TF
			#1E6B52	AT3G07360	Control	NON_TF
			#FFD602	AT4G01330	Control and Salt	NON_TF
			#A69363	AT2G44080	Salt	NON_TF
			#A69363	AT3G49780	Salt	NON_TF
			#1E6B52	AT1G48320	Control	NON_TF
			#1E6B52	AT5G54730	Control	NON_TF
			#1E6B52	AT1G29690	Control	NON_TF
			#1E6B52	AT4G01090	Control	NON_TF
			#1E6B52	AT3G55980	Control	TF
			#1E6B52	AT5G56100	Control	NON_TF
			#FFD602	AT2G38470	Control and Salt	TF
			#FFD602	AT4G27410	Control and Salt	TF
			#1E6B52	AT3G07350	Control	NON_TF
			#FFD602	AT3G49810	Control and Salt	NON_TF
			#1E6B52	AT4G17080	Control	NON_TF
			#1E6B52	AT1G31130	Control	NON_TF
			#1E6B52	AT3G51970	Control	NON_TF
			#1E6B52	AT3G02140	Control	NON_TF
			#FFD602	AT3G62950	Control and Salt	NON_TF
			#A69363	AT1G19050	Salt	TF
			#FFD602	AT4G10270	Control and Salt	NON_TF
			#FFD602	AT5G24210	Control and Salt	NON_TF
			#A69363	AT5G16590	Salt	NON_TF
			#A69363	AT5G41080	Salt	NON_TF
			#FFD602	AT3G02550	Control and Salt	TF
			#FFD602	AT4G01250	Control and Salt	TF
			#A69363	AT2G24790	Salt	TF
			#A69363	AT2G37950	Salt	NON_TF
			#FFD602	AT2G30040	Control and Salt	NON_TF
			#A69363	AT1G31290	Salt	NON_TF
			#A69363	AT1G19020	Salt	NON_TF
			#1E6B52	AT1G35140	Control	NON_TF
			#1E6B52	AT1G04770	Control	NON_TF
			#FFD602	AT1G75490	Control and Salt	TF
			#FFD602	AT5G04190	Control and Salt	NON_TF
			#1E6B52	AT4G33940	Control	NON_TF
			#1E6B52	AT3G57450	Control	NON_TF
			#1E6B52	AT2G27500	Control	NON_TF
			#1E6B52	AT4G39070	Control	TF
			#1E6B52	AT4G03110	Control	NON_TF
			#1E6B52	AT5G23130	Control	NON_TF
			#FFD602	AT1G66090	Control and Salt	NON_TF
			#1E6B52	AT1G68580	Control	NON_TF
			#1E6B52	AT1G16170	Control	NON_TF
			#1E6B52	AT5G15330	Control	NON_TF
			#1E6B52	AT3G57530	Control	NON_TF
			#1E6B52	AT3G11650	Control	NON_TF
			#1E6B52	AT1G51950	Control	TF
			#1E6B52	AT2G39650	Control	NON_TF
			#1E6B52	AT3G19030	Control	NON_TF
			#FFD602	AT3G46600	Control and Salt	TF
			#1E6B52	AT3G44260	Control	NON_TF
			#1E6B52	AT3G49940	Control	TF
			#FFD602	AT5G52250	Control and Salt	NON_TF
			#1E6B52	AT1G23480	Control	NON_TF
			#1E6B52	AT1G66160	Control	NON_TF
			#1E6B52	AT3G49530	Control	TF
			#1E6B52	AT1G27770	Control	NON_TF
			#FFD602	AT1G21910	Control and Salt	TF
			#A69363	AT3G01830	Salt	NON_TF
			#FFD602	AT2G28810	Control and Salt	TF
			#FFD602	AT2G04160	Control and Salt	NON_TF
			#1E6B52	AT5G66190	Control	NON_TF
			#1E6B52	AT1G03310	Control	NON_TF
			#1E6B52	AT5G17700	Control	NON_TF
			#1E6B52	AT5G08400	Control	NON_TF
			#1E6B52	AT4G28706	Control	NON_TF
			#FFD602	AT1G65900	Control and Salt	NON_TF
			#1E6B52	AT2G15820	Control	NON_TF
			#1E6B52	AT2G45540	Control	NON_TF
			#1E6B52	AT2G29760	Control	NON_TF
			#1E6B52	AT4G29210	Control	NON_TF
			#1E6B52	AT2G43550	Control	NON_TF
			#1E6B52	AT4G33700	Control	NON_TF
			#1E6B52	AT1G23820	Control	NON_TF
			#FFD602	AT4G32980	Control and Salt	TF
			#1E6B52	AT2G38010	Control	NON_TF
			#FFD602	AT5G59130	Control and Salt	NON_TF
			#1E6B52	AT1G68220	Control	NON_TF
			#1E6B52	AT1G03160	Control	NON_TF
			#1E6B52	AT5G57970	Control	NON_TF
			#1E6B52	AT3G48350	Control	NON_TF
			#FFD602	AT5G17520	Control and Salt	NON_TF
			#1E6B52	AT1G05960	Control	NON_TF
			#1E6B52	AT5G08500	Control	NON_TF
			#1E6B52	AT5G63780	Control	NON_TF
			#1E6B52	AT4G12910	Control	NON_TF
			#1E6B52	AT1G64150	Control	NON_TF
			#FFD602	AT5G11060	Control and Salt	TF
			#1E6B52	AT5G05740	Control	NON_TF
			#1E6B52	AT1G49670	Control	NON_TF
			#1E6B52	AT1G35720	Control	NON_TF
			#1E6B52	AT5G08370	Control	NON_TF
			#1E6B52	AT5G59350	Control	NON_TF
			#1E6B52	AT5G50180	Control	NON_TF
			#1E6B52	AT5G53020	Control	NON_TF
			#1E6B52	AT5G41410	Control	TF
			#1E6B52	AT3G12950	Control	NON_TF
			#1E6B52	AT4G20270	Control	NON_TF
			#A69363	AT2G18760	Salt	TF
			#1E6B52	AT2G26530	Control	NON_TF
			#1E6B52	AT2G24550	Control	NON_TF
			#1E6B52	AT4G17900	Control	TF
			#1E6B52	AT2G27830	Control	NON_TF
			#1E6B52	AT1G08860	Control	NON_TF
			#A69363	AT2G33380	Salt	NON_TF
			#FFD602	AT2G20670	Control and Salt	NON_TF
			#1E6B52	AT3G19380	Control	NON_TF
			#1E6B52	AT5G59080	Control	NON_TF
			#1E6B52	AT2G32150	Control	NON_TF
			#FFD602	AT5G55970	Control and Salt	NON_TF
			#FFD602	AT3G02170	Control and Salt	NON_TF
			#FFD602	AT1G21920	Control and Salt	NON_TF
			#1E6B52	AT2G17880	Control	NON_TF
			#1E6B52	AT1G10150	Control	NON_TF
			#FFD602	AT3G29670	Control and Salt	NON_TF
			#1E6B52	AT2G29300	Control	NON_TF
			#1E6B52	AT1G21010	Control	NON_TF
			#1E6B52	AT3G61060	Control	NON_TF
			#1E6B52	AT4G02075	Control	NON_TF
			#1E6B52	AT1G71970	Control	NON_TF
			#A69363	AT2G25200	Salt	NON_TF
			#A69363	AT1G72820	Salt	NON_TF
			#A69363	AT1G23390	Salt	NON_TF
			#1E6B52	AT1G27730	Control	TF
			#1E6B52	AT2G40140	Control	TF
			#1E6B52	AT2G17040	Control	TF
			#1E6B52	AT3G10985	Control	NON_TF
			#1E6B52	AT1G80840	Control	TF
			#FFD602	AT5G61600	Control and Salt	TF
			#1E6B52	AT2G37630	Control	TF
			#1E6B52	AT1G32240	Control	TF
			#1E6B52	AT3G01140	Control	TF
			#1E6B52	AT1G30260	Control	NON_TF
			#1E6B52	AT5G60850	Control	TF
			#1E6B52	AT2G47450	Control	NON_TF
			#1E6B52	AT4G08040	Control	NON_TF
			#1E6B52	AT1G67910	Control	NON_TF
			#1E6B52	AT4G33920	Control	NON_TF
			#1E6B52	AT1G63750	Control	NON_TF
			#1E6B52	AT4G31800	Control	TF
			#1E6B52	AT5G08520	Control	TF
			#1E6B52	AT3G47160	Control	NON_TF
			#1E6B52	AT5G02160	Control	NON_TF
			#1E6B52	AT2G15890	Control	NON_TF
			#FFD602	AT4G05150	Control and Salt	NON_TF
			#1E6B52	AT5G03470	Control	NON_TF
			#1E6B52	AT5G10695	Control	NON_TF
			#1E6B52	AT2G27690	Control	NON_TF
			#1E6B52	AT5G57550	Control	NON_TF
			#A69363	AT4G30610	Salt	NON_TF
			#1E6B52	AT1G28280	Control	NON_TF
			#1E6B52	AT2G33580	Control	NON_TF
			#1E6B52	AT5G26920	Control	NON_TF
			#FFD602	AT1G01060	Control and Salt	TF
			#1E6B52	AT1G70250	Control	NON_TF
			#1E6B52	AT4G10040	Control	NON_TF
			#1E6B52	AT3G24170	Control	NON_TF
			#1E6B52	AT2G34357	Control	NON_TF
			#1E6B52	AT3G22840	Control	NON_TF
			#1E6B52	AT2G37040	Control	NON_TF
			#1E6B52	AT3G27170	Control	NON_TF
			#FFD602	AT5G14760	Control and Salt	NON_TF
			#1E6B52	AT5G58420	Control	NON_TF
			#FFD602	AT1G32900	Control and Salt	NON_TF
			#1E6B52	AT4G26110	Control	NON_TF
			#A69363	AT1G32440	Salt	NON_TF
			#A69363	AT1G64490	Salt	NON_TF
			#A69363	AT2G48020	Salt	NON_TF
			#A69363	AT5G17310	Salt	NON_TF
			#A69363	AT1G66200	Salt	NON_TF
			#1E6B52	AT5G47370	Control	TF
			#1E6B52	AT1G67340	Control	NON_TF
			#1E6B52	AT3G17510	Control	NON_TF
			#FFD602	AT4G36730	Control and Salt	TF
			#FFD602	AT5G16820	Control and Salt	TF
			#1E6B52	AT3G53990	Control	NON_TF
			#1E6B52	AT2G46550	Control	NON_TF
			#1E6B52	AT3G10300	Control	NON_TF
			#1E6B52	AT4G23820	Control	NON_TF
			#1E6B52	AT1G05805	Control	TF
			#1E6B52	AT5G24490	Control	NON_TF
			#1E6B52	AT1G51940	Control	NON_TF
			#1E6B52	AT2G15960	Control	NON_TF
			#1E6B52	AT1G22540	Control	NON_TF
			#1E6B52	AT1G01820	Control	NON_TF
			#1E6B52	AT5G43440	Control	NON_TF
			#1E6B52	AT4G31060	Control	TF
			#1E6B52	AT1G16840	Control	NON_TF
			#1E6B52	AT4G04340	Control	NON_TF
			#1E6B52	AT5G63810	Control	NON_TF
			#1E6B52	AT3G19553	Control	NON_TF
			#1E6B52	AT5G66880	Control	NON_TF
			#1E6B52	AT2G31800	Control	NON_TF
			#1E6B52	AT1G19310	Control	NON_TF
			#1E6B52	AT2G20740	Control	NON_TF
			#1E6B52	AT3G47550	Control	NON_TF
			#1E6B52	AT1G20440	Control	NON_TF
			#1E6B52	AT4G22540	Control	NON_TF
			#1E6B52	AT1G66890	Control	NON_TF
			#A69363	AT5G57630	Salt	NON_TF
			#A69363	AT1G51890	Salt	NON_TF
			#FFD602	AT3G09600	Control and Salt	TF
			#1E6B52	AT1G76570	Control	NON_TF
			#1E6B52	AT4G37460	Control	NON_TF
			#1E6B52	AT2G23420	Control	NON_TF
			#1E6B52	AT5G15600	Control	NON_TF
			#1E6B52	AT3G21390	Control	NON_TF
			#1E6B52	AT2G31750	Control	NON_TF
			#1E6B52	AT3G12320	Control	NON_TF
			#1E6B52	AT1G07700	Control	NON_TF
			#1E6B52	AT1G06690	Control	NON_TF
			#1E6B52	AT3G08620	Control	NON_TF
			#1E6B52	AT1G74560	Control	NON_TF
			#1E6B52	AT5G26210	Control	TF
			#1E6B52	AT5G13170	Control	NON_TF
			#1E6B52	AT2G34460	Control	NON_TF
			#1E6B52	AT1G10740	Control	NON_TF
			#1E6B52	AT1G44000	Control	NON_TF
			#1E6B52	AT3G17800	Control	NON_TF
			#1E6B52	AT2G26800	Control	NON_TF
			#1E6B52	AT1G65490	Control	NON_TF
			#1E6B52	AT4G26150	Control	TF
			#1E6B52	AT4G35250	Control	NON_TF
			#1E6B52	AT4G37760	Control	NON_TF
			#A69363	AT5G01740	Salt	NON_TF
			#A69363	AT5G56980	Salt	NON_TF
			#FFD602	AT1G49720	Control and Salt	TF
			#1E6B52	AT5G61530	Control	NON_TF
			#1E6B52	AT2G42520	Control	NON_TF
			#FFD602	AT4G14270	Control and Salt	NON_TF
			#1E6B52	AT2G15970	Control	NON_TF
			#1E6B52	AT4G17100	Control	NON_TF
			#1E6B52	AT3G19490	Control	NON_TF
			#FFD602	AT3G12490	Control and Salt	NON_TF
			#1E6B52	AT4G09020	Control	NON_TF
			#1E6B52	AT4G16155	Control	NON_TF
			#FFD602	AT1G21680	Control and Salt	NON_TF
			#1E6B52	AT5G03460	Control	NON_TF
			#FFD602	AT1G22070	Control and Salt	NON_TF
			#1E6B52	AT4G27440	Control	NON_TF
			#1E6B52	AT1G09750	Control	NON_TF
			#1E6B52	AT3G32930	Control	NON_TF
			#1E6B52	AT1G21670	Control	NON_TF
			#FFD602	AT4G35480	Control and Salt	NON_TF
			#FFD602	AT3G18080	Control and Salt	NON_TF
			#1E6B52	AT5G53490	Control	NON_TF
			#A69363	AT4G01040	Salt	NON_TF
			#FFD602	AT5G58900	Control and Salt	TF
			#1E6B52	AT2G25930	Control	NON_TF
			#1E6B52	AT3G23280	Control	NON_TF
			#1E6B52	AT1G05620	Control	NON_TF
			#1E6B52	AT2G27680	Control	NON_TF
			#1E6B52	AT3G56680	Control	NON_TF
			#1E6B52	AT2G47390	Control	NON_TF
			#1E6B52	AT5G64560	Control	NON_TF
			#FFD602	AT1G09795	Control and Salt	NON_TF
			#FFD602	AT2G36390	Control and Salt	NON_TF
			#1E6B52	AT2G25730	Control	NON_TF
			#1E6B52	AT1G21600	Control	NON_TF
			#1E6B52	AT1G32170	Control	NON_TF
			#FFD602	AT4G37260	Control and Salt	TF
			#1E6B52	AT1G76650	Control	NON_TF
			#1E6B52	AT4G10910	Control	NON_TF
			#1E6B52	AT1G74930	Control	TF
			#1E6B52	AT2G36050	Control	TF
			#A69363	AT2G34770	Salt	NON_TF
			#A69363	AT4G24370	Salt	NON_TF
			#1E6B52	AT5G47230	Control	TF
			#1E6B52	AT3G46620	Control	NON_TF
			#1E6B52	AT5G06860	Control	NON_TF
			#1E6B52	AT3G10930	Control	NON_TF
			#1E6B52	AT4G23810	Control	TF
			#1E6B52	AT2G37430	Control	TF
			#1E6B52	AT2G25090	Control	NON_TF
			#1E6B52	AT1G15670	Control	NON_TF
			#1E6B52	AT1G72920	Control	NON_TF
			#1E6B52	AT5G59550	Control	NON_TF
			#FFD602	AT1G68670	Control and Salt	TF
			#1E6B52	AT2G25735	Control	NON_TF
			#1E6B52	AT2G26190	Control	NON_TF
			#A69363	AT5G67420	Salt	TF
			#A69363	AT2G39705	Salt	NON_TF
			#A69363	AT2G22960	Salt	NON_TF
			#A69363	AT1G24440	Salt	NON_TF
			#A69363	AT1G70700	Salt	TF
			#A69363	AT2G28630	Salt	NON_TF
			#A69363	AT4G12690	Salt	NON_TF
			#A69363	AT4G21510	Salt	NON_TF
			#A69363	AT3G06020	Salt	NON_TF
			#FFD602	AT1G77920	Control and Salt	TF
			#1E6B52	AT1G31690	Control	NON_TF
			#1E6B52	AT1G69440	Control	NON_TF
			#1E6B52	AT5G05250	Control	NON_TF
			#1E6B52	AT1G54220	Control	NON_TF
			#1E6B52	AT3G61920	Control	NON_TF
			#1E6B52	AT3G09620	Control	NON_TF
			#1E6B52	AT3G05970	Control	NON_TF
			#1E6B52	AT5G58570	Control	NON_TF
			#1E6B52	AT3G13930	Control	NON_TF
			#1E6B52	AT2G31400	Control	NON_TF
			#1E6B52	AT2G25110	Control	NON_TF
			#FFD602	AT4G38460	Control and Salt	NON_TF
			#A69363	AT5G42890	Salt	NON_TF
			#A69363	AT3G62240	Salt	NON_TF
			#A69363	AT5G51430	Salt	NON_TF
			#A69363	AT1G65430	Salt	NON_TF
			#A69363	AT1G44170	Salt	NON_TF
			#A69363	AT1G13950	Salt	NON_TF
			#A69363	AT4G14020	Salt	NON_TF
			#A69363	AT4G33985	Salt	NON_TF
			#A69363	AT5G39730	Salt	NON_TF
			#A69363	AT1G19690	Salt	NON_TF
			#FFD602	AT3G50700	Control and Salt	TF
			#1E6B52	AT5G11580	Control	NON_TF
			#1E6B52	AT5G03050	Control	NON_TF
			#1E6B52	AT5G37780	Control	NON_TF
			#1E6B52	AT1G08980	Control	NON_TF
			#FFD602	AT5G19540	Control and Salt	NON_TF
			#A69363	AT5G09630	Salt	NON_TF
			#1E6B52	AT4G11280	Control	NON_TF
			#1E6B52	AT1G73540	Control	NON_TF
			#1E6B52	AT2G31945	Control	NON_TF
			#1E6B52	AT5G05140	Control	NON_TF
			#FFD602	AT3G48100	Control and Salt	TF
			#1E6B52	AT5G14070	Control	NON_TF
			#1E6B52	AT1G12240	Control	NON_TF
			#1E6B52	AT5G53130	Control	NON_TF
			#A69363	AT5G43700	Salt	TF
			#A69363	AT4G37610	Salt	TF
			#1E6B52	AT3G47500	Control	TF
			#1E6B52	AT5G44190	Control	TF
			#FFD602	AT5G67190	Control and Salt	TF
			#1E6B52	AT3G13310	Control	NON_TF
			#1E6B52	AT5G24890	Control	NON_TF
			#1E6B52	AT1G69490	Control	TF
			#A69363	AT1G04360	Salt	NON_TF
			#1E6B52	AT3G53950	Control	NON_TF
			#1E6B52	AT4G36940	Control	NON_TF
			#1E6B52	AT3G62550	Control	NON_TF
			#1E6B52	AT1G70890	Control	NON_TF
			#1E6B52	AT2G15830	Control	NON_TF
			#FFD602	AT4G16190	Control and Salt	NON_TF
			#1E6B52	AT3G63160	Control	NON_TF
			#1E6B52	AT1G53450	Control	NON_TF
			#1E6B52	AT1G18720	Control	NON_TF
			#FFD602	AT4G32340	Control and Salt	NON_TF
			#A69363	AT1G49660	Salt	NON_TF
			#A69363	AT1G18710	Salt	TF
			#1E6B52	AT1G74450	Control	NON_TF
			#1E6B52	AT1G70940	Control	NON_TF
			#A69363	AT1G68190	Salt	TF
			#A69363	AT2G34620	Salt	TF
			#FFD602	AT4G28290	Control and Salt	NON_TF
			#1E6B52	AT4G37790	Control	TF
			#1E6B52	AT1G59590	Control	NON_TF
			#A69363	AT5G52900	Salt	NON_TF
			#A69363	AT4G34138	Salt	NON_TF
			#1E6B52	AT5G42830	Control	NON_TF
			#1E6B52	AT5G67450	Control	TF
			#1E6B52	AT2G35930	Control	NON_TF
			#1E6B52	AT2G30340	Control	TF
			#1E6B52	AT2G38860	Control	NON_TF
			#1E6B52	AT5G20960	Control	NON_TF
			#1E6B52	AT5G64120	Control	NON_TF
			#1E6B52	AT1G65730	Control	NON_TF
			#FFD602	AT5G13420	Control and Salt	NON_TF
			#A69363	AT1G80110	Salt	NON_TF
			#1E6B52	AT3G61150	Control	TF
			#1E6B52	AT2G37380	Control	NON_TF
			#1E6B52	AT5G65310	Control	TF
			#1E6B52	AT5G56610	Control	NON_TF
			#1E6B52	AT5G54650	Control	NON_TF
			#1E6B52	AT2G28900	Control	NON_TF
			#1E6B52	AT3G14310	Control	NON_TF
			#1E6B52	AT5G62890	Control	NON_TF
			#1E6B52	AT5G62720	Control	NON_TF
			#1E6B52	AT1G31850	Control	NON_TF
			#A69363	AT5G57220	Salt	NON_TF
			#1E6B52	AT5G64840	Control	NON_TF
			#FFD602	AT5G15850	Control and Salt	TF
			#A69363	AT1G12020	Salt	NON_TF
			#A69363	AT5G01600	Salt	NON_TF
			#1E6B52	AT5G39610	Control	TF
			#1E6B52	AT2G36080	Control	TF
			#1E6B52	AT2G34500	Control	NON_TF
			#1E6B52	AT2G03340	Control	TF
			#1E6B52	AT4G04910	Control	NON_TF
			#1E6B52	AT1G69740	Control	NON_TF
			#1E6B52	AT3G18440	Control	NON_TF
			#1E6B52	AT3G60860	Control	NON_TF
			#FFD602	AT1G49010	Control and Salt	TF
			#1E6B52	AT3G28270	Control	NON_TF
			#FFD602	AT4G10120	Control and Salt	NON_TF
			#1E6B52	AT1G08570	Control	NON_TF
			#A69363	AT4G28080	Salt	NON_TF
			#A69363	AT3G55800	Salt	NON_TF
			#A69363	AT5G14740	Salt	NON_TF
			#A69363	AT2G32640	Salt	NON_TF
			#A69363	AT1G74070	Salt	NON_TF
			#A69363	AT1G09340	Salt	NON_TF
			#A69363	AT3G63410	Salt	NON_TF
			#A69363	AT4G29060	Salt	NON_TF
			#A69363	AT5G20720	Salt	NON_TF
			#A69363	AT2G28000	Salt	NON_TF
			#A69363	AT3G56910	Salt	NON_TF
			#A69363	AT1G11860	Salt	NON_TF
			#A69363	AT5G13510	Salt	NON_TF
			#A69363	AT5G42765	Salt	NON_TF
			#FFD602	AT2G22430	Control and Salt	TF
			#1E6B52	AT2G26230	Control	NON_TF
			#1E6B52	AT1G63830	Control	NON_TF
			#1E6B52	AT2G21380	Control	NON_TF
			#1E6B52	AT5G65670	Control	TF
			#1E6B52	AT2G26200	Control	NON_TF
			#1E6B52	AT1G51510	Control	NON_TF
			#A69363	AT1G07230	Salt	NON_TF
			#1E6B52	AT1G10140	Control	NON_TF
			#A69363	AT4G17810	Salt	TF
			#A69363	AT1G67050	Salt	NON_TF
			#1E6B52	AT5G14550	Control	NON_TF
			#1E6B52	AT3G18930	Control	NON_TF
			#FFD602	AT5G05090	Control and Salt	TF
			#1E6B52	AT3G18050	Control	NON_TF
			#1E6B52	AT5G12120	Control	NON_TF
			#A69363	AT1G73470	Salt	NON_TF
			#A69363	AT1G70820	Salt	NON_TF
			#1E6B52	AT5G22890	Control	TF
			#1E6B52	AT1G78000	Control	NON_TF
			#FFD602	AT1G73870	Control and Salt	TF
			#1E6B52	AT1G53230	Control	TF
			#1E6B52	AT5G13730	Control	TF
			#1E6B52	AT5G39210	Control	NON_TF
			#1E6B52	AT3G45050	Control	NON_TF
			#1E6B52	AT3G16250	Control	NON_TF
			#1E6B52	AT5G59020	Control	NON_TF
			#1E6B52	AT5G66530	Control	NON_TF
			#FFD602	AT3G24760	Control and Salt	NON_TF
			#1E6B52	AT2G43000	Control	TF
			#1E6B52	AT4G04490	Control	NON_TF
			#1E6B52	AT2G32680	Control	NON_TF
			#1E6B52	AT5G45380	Control	NON_TF
			#1E6B52	AT1G75040	Control	NON_TF
			#FFD602	AT3G11020	Control and Salt	TF
			#A69363	AT1G75800	Salt	NON_TF
			#A69363	AT3G04010	Salt	NON_TF
			#A69363	AT4G18240	Salt	NON_TF
			#A69363	AT5G61290	Salt	NON_TF
			#A69363	AT1G49650	Salt	NON_TF
			#FFD602	AT5G51190	Control and Salt	TF
			#A69363	AT5G14730	Salt	NON_TF
			#FFD602	AT4G25480	Control and Salt	TF
			#1E6B52	AT1G29395	Control	NON_TF
			#1E6B52	AT5G52310	Control	NON_TF
			#A69363	AT1G53320	Salt	TF
			#A69363	AT5G26340	Salt	NON_TF
			#1E6B52	AT2G25000	Control	TF
			#1E6B52	AT1G17860	Control	NON_TF
			#1E6B52	AT3G26210	Control	NON_TF
			#1E6B52	AT2G43510	Control	NON_TF
			#FFD602	AT5G04340	Control and Salt	TF
			#1E6B52	AT3G11280	Control	TF
			#1E6B52	AT4G31310	Control	NON_TF
			#1E6B52	AT5G64460	Control	NON_TF
			#1E6B52	AT2G41120	Control	NON_TF
			#FFD602	AT1G19000	Control and Salt	TF
			#1E6B52	AT1G15290	Control	NON_TF
			#1E6B52	AT2G21185	Control	NON_TF
			#1E6B52	AT4G33666	Control	NON_TF
			#1E6B52	AT2G46030	Control	NON_TF
			#A69363	AT5G18630	Salt	NON_TF
			#A69363	AT5G48490	Salt	NON_TF
			#FFD602	AT3G59060	Control and Salt	TF
			#FFD602	AT1G69160	Control and Salt	NON_TF
			#A69363	AT5G58350	Salt	NON_TF
			#1E6B52	AT5G02840	Control	TF
			#1E6B52	AT1G01490	Control	NON_TF
			#1E6B52	AT1G06430	Control	NON_TF
			#1E6B52	AT3G10420	Control	NON_TF
			#FFD602	AT5G15450	Control and Salt	NON_TF
			#A69363	AT3G30300	Salt	NON_TF
			#FFD602	AT2G46270	Control and Salt	TF
			#FFD602	AT1G29160	Control and Salt	TF
			#1E6B52	AT3G42670	Control	TF
			#A69363	AT1G08470	Salt	NON_TF
			#1E6B52	AT3G17609	Control	TF
			#1E6B52	AT5G37260	Control	TF
			#1E6B52	AT1G65480	Control	NON_TF
			#1E6B52	AT3G04730	Control	TF
			#1E6B52	AT1G79700	Control	TF
			#A69363	AT4G37590	Salt	NON_TF
			#1E6B52	AT4G00050	Control	TF
			#1E6B52	AT3G51240	Control	NON_TF
			#1E6B52	AT2G04039	Control	NON_TF
			#1E6B52	AT4G33050	Control	NON_TF
			#1E6B52	AT1G24140	Control	NON_TF
			#1E6B52	AT1G21000	Control	TF
			#1E6B52	AT3G27785	Control	TF
			#1E6B52	AT4G13790	Control	NON_TF
			#1E6B52	AT5G46830	Control	TF
			#1E6B52	AT5G45950	Control	NON_TF
			#FFD602	AT2G46830	Control and Salt	TF
			#1E6B52	AT5G49330	Control	TF
			#1E6B52	AT1G30530	Control	NON_TF
			#1E6B52	AT1G62310	Control	TF
			#1E6B52	AT3G21060	Control	NON_TF
			#1E6B52	AT2G43010	Control	TF
			#1E6B52	AT1G52220	Control	NON_TF
			#1E6B52	AT5G19140	Control	NON_TF
			#1E6B52	AT5G11260	Control	TF
			#1E6B52	AT1G78510	Control	NON_TF
			#1E6B52	AT1G51700	Control	TF
			#1E6B52	AT5G47050	Control	NON_TF
			#1E6B52	AT5G58120	Control	NON_TF
			#1E6B52	AT1G72300	Control	NON_TF
			#1E6B52	AT3G10500	Control	TF
			#1E6B52	AT1G30900	Control	NON_TF
			#A69363	AT4G36540	Salt	TF
			#1E6B52	AT5G13180	Control	TF
			#1E6B52	AT5G35460	Control	NON_TF
			#FFD602	AT4G34590	Control and Salt	TF
			#1E6B52	AT1G79110	Control	NON_TF
			#1E6B52	AT4G30350	Control	NON_TF
			#A69363	AT5G04410	Salt	TF
			#A69363	AT1G75760	Salt	NON_TF
			#A69363	AT3G09820	Salt	NON_TF
			#A69363	AT3G16330	Salt	NON_TF
			#A69363	AT5G10550	Salt	NON_TF
			#A69363	AT5G29000	Salt	TF
			#A69363	AT5G53820	Salt	NON_TF
			#A69363	AT1G62045	Salt	NON_TF
			#A69363	AT3G21190	Salt	NON_TF
			#A69363	AT5G42570	Salt	NON_TF
			#A69363	AT1G80130	Salt	NON_TF
			#A69363	AT3G16050	Salt	NON_TF
			#A69363	AT1G71840	Salt	NON_TF
			#A69363	AT2G42490	Salt	NON_TF
			#A69363	AT1G19710	Salt	NON_TF
			#A69363	AT3G29360	Salt	NON_TF
			#A69363	AT5G25240	Salt	NON_TF
			#A69363	AT1G70780	Salt	NON_TF
			#A69363	AT5G62530	Salt	NON_TF
			#A69363	AT3G06860	Salt	NON_TF
			#FFD602	AT4G01550	Control and Salt	TF
			#1E6B52	AT4G23270	Control	NON_TF
			#1E6B52	AT1G20630	Control	NON_TF
			#1E6B52	AT1G72050	Control	TF
			#1E6B52	AT4G35510	Control	NON_TF
			#1E6B52	AT1G77200	Control	TF
			#1E6B52	AT5G03590	Control	NON_TF
			#1E6B52	AT4G28085	Control	NON_TF
			#FFD602	AT5G13090	Control and Salt	NON_TF
			#A69363	AT3G55960	Salt	NON_TF
			#A69363	AT2G39870	Salt	NON_TF
			#A69363	AT1G01930	Salt	NON_TF
			#A69363	AT2G35800	Salt	NON_TF
			#A69363	AT2G41100	Salt	NON_TF
			#A69363	AT5G18670	Salt	NON_TF
			#1E6B52	AT4G01280	Control	TF
			#1E6B52	AT5G24110	Control	TF
			#FFD602	AT2G22540	Control and Salt	TF
			#1E6B52	AT5G01530	Control	NON_TF
			#A69363	AT1G24575	Salt	NON_TF
			#A69363	AT1G16240	Salt	NON_TF
			#A69363	AT5G62170	Salt	NON_TF
			#A69363	AT5G16570	Salt	NON_TF
			#1E6B52	AT5G18830	Control	TF
			#1E6B52	AT5G24380	Control	NON_TF
			#1E6B52	AT4G30060	Control	NON_TF
			#A69363	AT3G29575	Salt	NON_TF
			#A69363	AT4G24960	Salt	NON_TF
			#A69363	AT1G49450	Salt	NON_TF
			#A69363	AT3G57540	Salt	NON_TF
			#A69363	AT5G49120	Salt	NON_TF
			#A69363	AT1G60190	Salt	NON_TF
			#A69363	AT3G14067	Salt	NON_TF
			#A69363	AT5G66460	Salt	NON_TF
			#A69363	AT2G41870	Salt	NON_TF
			#A69363	AT1G30500	Salt	TF
			#A69363	AT2G45600	Salt	NON_TF
			#1E6B52	AT1G30210	Control	TF
			#1E6B52	AT4G36760	Control	NON_TF
			#FFD602	AT2G01930	Control and Salt	TF
			#1E6B52	AT5G04040	Control	NON_TF
			#1E6B52	AT1G01620	Control	NON_TF
			#1E6B52	AT2G42190	Control	NON_TF
			#A69363	AT5G57180	Salt	TF
			#1E6B52	AT2G01940	Control	TF
			#1E6B52	AT4G04955	Control	NON_TF
			#1E6B52	AT3G04070	Control	TF
			#1E6B52	AT3G01420	Control	NON_TF
			#1E6B52	AT4G13660	Control	NON_TF
			#1E6B52	AT4G18390	Control	TF
			#1E6B52	AT1G75820	Control	NON_TF
			#1E6B52	AT3G23210	Control	TF
			#1E6B52	AT2G21320	Control	TF
			#1E6B52	AT5G12470	Control	NON_TF
			#FFD602	AT4G23750	Control and Salt	TF
			#1E6B52	AT3G19680	Control	NON_TF
			#A69363	AT5G02450	Salt	NON_TF
			#1E6B52	AT5G58110	Control	NON_TF
			#1E6B52	AT1G64620	Control	TF
			#1E6B52	AT5G18930	Control	NON_TF
			#1E6B52	AT2G22300	Control	TF
			#FFD602	AT5G08330	Control and Salt	TF
			#A69363	AT5G01210	Salt	NON_TF
			#1E6B52	AT3G24050	Control	TF
			#1E6B52	AT1G68400	Control	NON_TF
			#1E6B52	AT2G40180	Control	NON_TF
			#A69363	AT1G36160	Salt	NON_TF
			#1E6B52	AT1G29280	Control	TF
			#1E6B52	AT5G64100	Control	NON_TF
			#1E6B52	AT1G62300	Control	TF
			#1E6B52	AT1G51790	Control	NON_TF
			#1E6B52	AT1G27360	Control	TF
			#1E6B52	AT4G36470	Control	NON_TF
			#1E6B52	AT1G34370	Control	TF
			#A69363	AT1G21460	Salt	NON_TF
			#A69363	AT1G27940	Salt	NON_TF
			#A69363	AT5G05790	Salt	TF
			#A69363	AT4G15545	Salt	NON_TF
			#A69363	AT5G48220	Salt	NON_TF
			#A69363	AT3G57330	Salt	NON_TF
			#A69363	AT2G36000	Salt	TF
			#A69363	AT1G53120	Salt	NON_TF
			#A69363	AT3G61210	Salt	NON_TF
			#A69363	AT1G32540	Salt	NON_TF
			#A69363	AT4G19820	Salt	NON_TF
			#A69363	AT4G20360	Salt	NON_TF
			#A69363	AT1G19510	Salt	TF
			#A69363	AT1G48610	Salt	NON_TF
			#A69363	AT2G28950	Salt	NON_TF
			#A69363	AT1G78240	Salt	NON_TF
			#A69363	AT2G02450	Salt	TF
			#A69363	AT5G59430	Salt	NON_TF
			#A69363	AT5G62920	Salt	TF
			#A69363	AT4G24180	Salt	NON_TF
			#A69363	AT5G04770	Salt	NON_TF
			#A69363	AT1G77210	Salt	NON_TF
			#A69363	AT5G51550	Salt	NON_TF
			#A69363	AT1G68520	Salt	TF
			#A69363	AT4G16750	Salt	TF
			#A69363	AT4G30660	Salt	NON_TF
			#A69363	AT5G27930	Salt	NON_TF
			#A69363	AT2G42530	Salt	NON_TF
			#A69363	AT2G17840	Salt	NON_TF
			#A69363	AT1G29390	Salt	NON_TF
			#A69363	AT5G10860	Salt	NON_TF
			#A69363	AT5G04170	Salt	NON_TF
			#A69363	AT3G26580	Salt	NON_TF
			#A69363	AT4G18890	Salt	TF
			#A69363	AT2G40610	Salt	NON_TF
			#A69363	AT3G13740	Salt	NON_TF
			#A69363	AT3G13510	Salt	NON_TF
			#A69363	AT5G10030	Salt	TF
			#A69363	AT1G11260	Salt	NON_TF
			#A69363	AT3G52060	Salt	NON_TF
			#A69363	AT2G37470	Salt	NON_TF
			#A69363	AT3G59900	Salt	NON_TF
			#A69363	AT1G49850	Salt	NON_TF
			#A69363	AT4G10350	Salt	TF
			#A69363	AT3G08550	Salt	NON_TF
			#A69363	AT1G72240	Salt	NON_TF
			#A69363	AT4G05100	Salt	TF
			#A69363	AT5G57610	Salt	NON_TF
			#A69363	AT4G04800	Salt	NON_TF
			#A69363	AT3G44280	Salt	NON_TF
			#A69363	AT5G02230	Salt	NON_TF
			#A69363	AT4G30490	Salt	NON_TF
			#A69363	AT3G21240	Salt	NON_TF
			#A69363	AT2G04350	Salt	NON_TF
			#A69363	AT5G53710	Salt	NON_TF
			#A69363	AT2G21830	Salt	NON_TF
			#A69363	AT1G69260	Salt	NON_TF
			#A69363	AT3G14560	Salt	NON_TF
			#A69363	AT3G22370	Salt	NON_TF
			#A69363	AT5G59220	Salt	NON_TF
			#A69363	AT3G50410	Salt	TF
			#A69363	AT1G01390	Salt	NON_TF
			#A69363	AT4G39900	Salt	NON_TF
			#A69363	AT4G13720	Salt	NON_TF
			#A69363	AT1G75390	Salt	TF
			#A69363	AT5G16910	Salt	NON_TF
			#A69363	AT1G64110	Salt	NON_TF
			#A69363	AT5G53870	Salt	NON_TF
			#A69363	AT5G66400	Salt	NON_TF
			#A69363	AT3G01590	Salt	NON_TF
			#A69363	AT2G36640	Salt	NON_TF
			#A69363	AT3G10340	Salt	NON_TF
			#A69363	AT4G32800	Salt	TF
			#A69363	AT4G01400	Salt	NON_TF
			#A69363	AT5G52660	Salt	TF
			#A69363	AT5G11230	Salt	NON_TF
			#A69363	AT2G24420	Salt	NON_TF
			#A69363	AT2G28470	Salt	NON_TF
			#A69363	AT4G35860	Salt	NON_TF
			#A69363	AT4G16150	Salt	TF
			#A69363	AT4G11660	Salt	TF
			#A69363	AT1G48750	Salt	NON_TF
			#A69363	AT3G24500	Salt	TF
			#A69363	AT3G09440	Salt	NON_TF
			#A69363	AT5G53400	Salt	NON_TF
			#A69363	AT5G65470	Salt	NON_TF
			#A69363	AT4G36990	Salt	TF
			#A69363	AT5G09590	Salt	NON_TF
			#A69363	AT3G53230	Salt	NON_TF
			#A69363	AT2G20560	Salt	NON_TF
			#A69363	AT1G77120	Salt	NON_TF
			#A69363	AT5G37670	Salt	NON_TF
			#A69363	AT5G64310	Salt	NON_TF
			#A69363	AT1G62740	Salt	NON_TF
			#A69363	AT4G23885	Salt	NON_TF
			#A69363	AT1G57590	Salt	NON_TF
			#A69363	AT4G28140	Salt	TF
			#A69363	AT4G37470	Salt	NON_TF
			#A69363	AT3G62750	Salt	NON_TF
			#A69363	AT3G53180	Salt	NON_TF
			#A69363	AT1G09530	Salt	TF
			#A69363	AT1G02205	Salt	NON_TF
			#A69363	AT1G01250	Salt	TF
			#A69363	AT1G47960	Salt	NON_TF
			#A69363	AT3G11440	Salt	TF
			#A69363	AT5G62220	Salt	NON_TF
			#A69363	AT5G53120	Salt	NON_TF
			#A69363	AT3G14180	Salt	TF
			#A69363	AT1G22370	Salt	NON_TF
			#A69363	AT5G43840	Salt	TF
			#A69363	AT3G17790	Salt	NON_TF
			#A69363	AT4G05020	Salt	NON_TF
			#A69363	AT4G21980	Salt	NON_TF
			#A69363	AT1G43160	Salt	TF
			#A69363	AT5G65390	Salt	NON_TF
			#A69363	AT4G02380	Salt	NON_TF
			#A69363	AT2G32190	Salt	NON_TF
			#A69363	AT2G31730	Salt	NON_TF
			#A69363	AT2G33710	Salt	TF
			#A69363	AT3G24570	Salt	NON_TF
			#A69363	AT2G31230	Salt	TF
			#A69363	AT2G22320	Salt	NON_TF
			#A69363	AT3G24520	Salt	TF
			#A69363	AT1G69270	Salt	NON_TF
			#A69363	AT5G25390	Salt	TF
			#A69363	AT5G41460	Salt	NON_TF
			#A69363	AT1G66430	Salt	NON_TF
			#A69363	AT3G10850	Salt	NON_TF
			#A69363	AT1G74520	Salt	NON_TF
			#A69363	AT5G08100	Salt	NON_TF
			#A69363	AT1G52890	Salt	TF
			#A69363	AT5G62020	Salt	TF
			#A69363	AT2G13770	Salt	NON_TF
			#A69363	AT1G52560	Salt	NON_TF
			#A69363	AT5G52640	Salt	NON_TF
			#A69363	AT4G12400	Salt	NON_TF
			#A69363	AT2G34310	Salt	NON_TF
			#A69363	AT3G07090	Salt	NON_TF
			#A69363	AT1G09140	Salt	NON_TF
			#A69363	AT1G08810	Salt	TF
			#A69363	AT1G63850	Salt	NON_TF
			#A69363	AT5G49100	Salt	NON_TF
			#A69363	AT1G32220	Salt	NON_TF
			#A69363	AT5G27600	Salt	NON_TF
			#A69363	AT1G04120	Salt	NON_TF
			#A69363	AT1G09850	Salt	NON_TF
			#A69363	AT4G25490	Salt	TF
			#A69363	AT4G01130	Salt	NON_TF
			#A69363	AT2G34710	Salt	TF
			#A69363	AT3G54340	Salt	TF
			#A69363	AT5G20240	Salt	TF
			#A69363	AT2G45660	Salt	TF
			#A69363	AT1G69480	Salt	NON_TF
			#A69363	AT5G13330	Salt	TF
			#A69363	AT2G23610	Salt	NON_TF
			#A69363	AT1G26210	Salt	NON_TF
			#A69363	AT2G18300	Salt	TF
			#A69363	AT2G47070	Salt	TF
			#A69363	AT5G65700	Salt	NON_TF
			#A69363	AT3G50750	Salt	TF
			#A69363	AT1G55370	Salt	NON_TF
			#A69363	AT2G41510	Salt	NON_TF
			#A69363	AT5G16470	Salt	NON_TF
			#A69363	AT4G39780	Salt	TF
			#A69363	AT4G12980	Salt	NON_TF
			#A69363	AT4G25170	Salt	NON_TF
			#A69363	AT3G16240	Salt	NON_TF
			#A69363	AT3G10720	Salt	NON_TF
			#A69363	AT2G40020	Salt	NON_TF
			#A69363	AT2G45190	Salt	TF
			#A69363	AT3G24430	Salt	NON_TF
			#A69363	AT1G64355	Salt	NON_TF
			#A69363	AT3G28910	Salt	TF
			#A69363	AT2G33630	Salt	NON_TF
			#A69363	AT4G14410	Salt	TF
			#A69363	AT3G22830	Salt	TF
			#A69363	AT2G32290	Salt	NON_TF
			#A69363	AT2G45740	Salt	NON_TF
			#A69363	AT5G51820	Salt	NON_TF
			#A69363	AT1G47870	Salt	TF
			#A69363	AT1G22300	Salt	NON_TF
			#A69363	AT4G24240	Salt	TF
			#A69363	AT1G55450	Salt	NON_TF
			#A69363	AT5G62430	Salt	TF
			#A69363	AT2G38150	Salt	NON_TF
			#A69363	AT5G66730	Salt	TF
			#A69363	AT3G61440	Salt	NON_TF
			#A69363	AT2G40620	Salt	TF
			#A69363	AT5G05550	Salt	TF
			#A69363	AT3G27280	Salt	NON_TF
			#A69363	AT5G03150	Salt	TF
			#A69363	AT3G10120	Salt	NON_TF
			#A69363	AT2G23340	Salt	TF
			#A69363	AT2G25520	Salt	NON_TF
			#A69363	AT1G69180	Salt	TF
			#A69363	AT1G33900	Salt	NON_TF
			#A69363	AT5G11510	Salt	TF
			#A69363	AT1G44110	Salt	NON_TF
			#A69363	AT1G06180	Salt	TF
			#A69363	AT5G50360	Salt	NON_TF
			#A69363	AT3G16770	Salt	TF
			#A69363	AT5G38520	Salt	NON_TF
			#A69363	AT1G49480	Salt	TF
			#A69363	AT4G36970	Salt	NON_TF
			#A69363	AT2G03500	Salt	TF
			#A69363	AT5G04820	Salt	TF
			#A69363	AT1G03730	Salt	NON_TF
			#A69363	AT3G61890	Salt	TF
			#A69363	AT1G56580	Salt	NON_TF
			#A69363	AT1G12630	Salt	TF
			#A69363	AT2G03710	Salt	TF
			#A69363	AT2G02080	Salt	TF
			#A69363	AT5G14940	Salt	NON_TF
			#A69363	AT1G32150	Salt	TF
			#A69363	AT1G30520	Salt	NON_TF
			#A69363	AT5G14960	Salt	TF
			#A69363	AT3G18370	Salt	NON_TF
			#A69363	AT3G52540	Salt	TF
			#A69363	AT5G05690	Salt	NON_TF

## Sheet: Shoot Drought Salft CERN
color	name	Net	TF
#1E6B52	AT3G47500	Drought	TF
#1E6B52	AT5G58870	Drought	NON_TF
#1E6B52	AT1G18460	Drought	NON_TF
#1E6B52	AT2G31380	Drought	TF
#1E6B52	AT3G12320	Drought	NON_TF
#1E6B52	AT4G14900	Drought	NON_TF
#1E6B52	AT5G48900	Drought	NON_TF
#1E6B52	AT1G04250	Drought	TF
#1E6B52	AT5G64780	Drought	NON_TF
#FFD602	AT1G73870	Drought and Salt	TF
#1E6B52	AT5G13630	Drought	NON_TF
#1E6B52	AT4G35250	Drought	NON_TF
#1E6B52	AT5G13180	Drought	TF
#FFD602	AT2G45190	Drought and Salt	TF
#FFD602	AT3G50750	Drought and Salt	TF
#1E6B52	AT1G62510	Drought	NON_TF
#1E6B52	AT3G10420	Drought	NON_TF
#A69363	AT1G64355	Salt	NON_TF
#A69363	AT3G24430	Salt	NON_TF
#FFD602	AT2G46270	Drought and Salt	TF
#1E6B52	AT1G22510	Drought	NON_TF
#FFD602	AT5G52660	Drought and Salt	TF
#1E6B52	AT5G14700	Drought	NON_TF
#1E6B52	AT1G56600	Drought	NON_TF
#1E6B52	AT2G25490	Drought	NON_TF
#1E6B52	AT2G22880	Drought	NON_TF
#1E6B52	AT4G29950	Drought	NON_TF
#1E6B52	AT5G40390	Drought	NON_TF
#1E6B52	AT1G78070	Drought	NON_TF
#1E6B52	AT4G35550	Drought	TF
#FFD602	AT5G59220	Drought and Salt	NON_TF
#1E6B52	AT2G03240	Drought	NON_TF
#1E6B52	AT5G12940	Drought	NON_TF
#1E6B52	AT5G54470	Drought	TF
#1E6B52	AT2G40230	Drought	NON_TF
#1E6B52	AT1G61890	Drought	NON_TF
#1E6B52	AT1G24140	Drought	NON_TF
#1E6B52	AT2G35710	Drought	NON_TF
#1E6B52	AT3G27270	Drought	NON_TF
#1E6B52	AT5G54300	Drought	NON_TF
#1E6B52	AT1G09350	Drought	NON_TF
#1E6B52	AT2G27690	Drought	NON_TF
#1E6B52	AT4G36500	Drought	NON_TF
#1E6B52	AT1G20070	Drought	NON_TF
#1E6B52	AT2G22010	Drought	NON_TF
#1E6B52	AT1G18890	Drought	NON_TF
#1E6B52	AT5G22250	Drought	NON_TF
#1E6B52	AT5G62070	Drought	NON_TF
#1E6B52	AT5G25440	Drought	NON_TF
#1E6B52	AT1G21380	Drought	NON_TF
#1E6B52	AT4G23630	Drought	NON_TF
#1E6B52	AT5G66650	Drought	NON_TF
#1E6B52	AT2G32800	Drought	NON_TF
#1E6B52	AT3G50930	Drought	NON_TF
#1E6B52	AT2G20370	Drought	NON_TF
#1E6B52	AT4G17550	Drought	NON_TF
#1E6B52	AT5G41900	Drought	NON_TF
#1E6B52	AT4G38810	Drought	NON_TF
#1E6B52	AT5G42050	Drought	NON_TF
#1E6B52	AT3G50760	Drought	NON_TF
#1E6B52	AT4G00360	Drought	NON_TF
#FFD602	AT1G19020	Drought and Salt	NON_TF
#1E6B52	AT5G08130	Drought	TF
#1E6B52	AT5G66210	Drought	NON_TF
#1E6B52	AT5G65300	Drought	NON_TF
#1E6B52	AT2G30360	Drought	NON_TF
#1E6B52	AT2G46370	Drought	NON_TF
#1E6B52	AT1G64380	Drought	TF
#1E6B52	AT5G58160	Drought	NON_TF
#1E6B52	AT1G05170	Drought	NON_TF
#FFD602	AT3G57540	Drought and Salt	NON_TF
#FFD602	AT1G52890	Drought and Salt	TF
#1E6B52	AT2G02860	Drought	NON_TF
#FFD602	AT1G69260	Drought and Salt	NON_TF
#FFD602	AT4G24960	Drought and Salt	NON_TF
#1E6B52	AT4G34410	Drought	TF
#1E6B52	AT3G21220	Drought	NON_TF
#1E6B52	AT5G49520	Drought	TF
#1E6B52	AT1G61340	Drought	NON_TF
#1E6B52	AT1G69840	Drought	NON_TF
#1E6B52	AT1G19180	Drought	TF
#1E6B52	AT1G74950	Drought	TF
#1E6B52	AT4G15480	Drought	NON_TF
#1E6B52	AT4G30430	Drought	NON_TF
#1E6B52	AT5G22630	Drought	NON_TF
#1E6B52	AT5G41600	Drought	NON_TF
#1E6B52	AT3G46450	Drought	NON_TF
#1E6B52	AT3G50260	Drought	TF
#1E6B52	AT1G77280	Drought	NON_TF
#1E6B52	AT4G18170	Drought	TF
#1E6B52	AT2G44970	Drought	NON_TF
#1E6B52	AT2G39250	Drought	TF
#1E6B52	AT4G30470	Drought	NON_TF
#FFD602	AT5G45280	Drought and Salt	NON_TF
#1E6B52	AT5G60790	Drought	NON_TF
#FFD602	AT4G05020	Drought and Salt	NON_TF
#FFD602	AT4G28140	Drought and Salt	TF
#1E6B52	AT5G01730	Drought	NON_TF
#1E6B52	AT4G36010	Drought	NON_TF
#1E6B52	AT1G20450	Drought	NON_TF
#1E6B52	AT4G18010	Drought	NON_TF
#FFD602	AT5G67300	Drought and Salt	TF
#1E6B52	AT3G48090	Drought	NON_TF
#1E6B52	AT5G11650	Drought	NON_TF
#1E6B52	AT1G19970	Drought	NON_TF
#1E6B52	AT4G17230	Drought	TF
#1E6B52	AT1G20823	Drought	NON_TF
#1E6B52	AT3G44720	Drought	NON_TF
#1E6B52	AT4G11330	Drought	NON_TF
#1E6B52	AT3G21890	Drought	TF
#1E6B52	AT3G25780	Drought	NON_TF
#1E6B52	AT4G30340	Drought	NON_TF
#1E6B52	AT4G39830	Drought	NON_TF
#1E6B52	AT1G08050	Drought	NON_TF
#1E6B52	AT2G41900	Drought	TF
#1E6B52	AT1G74430	Drought	TF
#1E6B52	AT1G20510	Drought	NON_TF
#1E6B52	AT5G19875	Drought	NON_TF
#1E6B52	AT4G23220	Drought	NON_TF
#1E6B52	AT3G11420	Drought	NON_TF
#1E6B52	AT2G44840	Drought	TF
#1E6B52	AT3G51890	Drought	NON_TF
#FFD602	AT3G29575	Drought and Salt	NON_TF
#1E6B52	AT4G34390	Drought	NON_TF
#1E6B52	AT4G00570	Drought	NON_TF
#1E6B52	AT5G57050	Drought	NON_TF
#1E6B52	AT1G27760	Drought	NON_TF
#1E6B52	AT5G48655	Drought	NON_TF
#1E6B52	AT3G52400	Drought	NON_TF
#1E6B52	AT1G08860	Drought	NON_TF
#1E6B52	AT2G25460	Drought	NON_TF
#1E6B52	AT2G32930	Drought	TF
#1E6B52	AT3G54950	Drought	NON_TF
#1E6B52	AT2G22500	Drought	NON_TF
#1E6B52	AT4G27520	Drought	NON_TF
#A69363	AT1G60190	Salt	NON_TF
#A69363	AT3G14067	Salt	NON_TF
#A69363	AT2G41870	Salt	NON_TF
#A69363	AT5G49120	Salt	NON_TF
#FFD602	AT5G66460	Drought and Salt	NON_TF
#A69363	AT1G30500	Salt	TF
#A69363	AT2G45600	Salt	NON_TF
#A69363	AT1G49450	Salt	NON_TF
#1E6B52	AT1G30210	Drought	TF
#1E6B52	AT4G33540	Drought	NON_TF
#FFD602	AT4G01130	Drought and Salt	NON_TF
#1E6B52	AT3G12290	Drought	NON_TF
#1E6B52	AT3G14310	Drought	NON_TF
#1E6B52	AT3G26740	Drought	NON_TF
#FFD602	AT5G64860	Drought and Salt	NON_TF
#1E6B52	AT4G09020	Drought	NON_TF
#1E6B52	AT2G31040	Drought	NON_TF
#1E6B52	AT3G62550	Drought	NON_TF
#FFD602	AT2G33630	Drought and Salt	NON_TF
#1E6B52	AT2G42520	Drought	NON_TF
#1E6B52	AT1G80480	Drought	NON_TF
#1E6B52	AT1G71800	Drought	NON_TF
#1E6B52	AT5G13730	Drought	TF
#1E6B52	AT2G41705	Drought	NON_TF
#1E6B52	AT3G52180	Drought	NON_TF
#FFD602	AT1G72520	Drought and Salt	NON_TF
#1E6B52	AT1G51660	Drought	NON_TF
#1E6B52	AT5G25930	Drought	NON_TF
#1E6B52	AT5G27420	Drought	NON_TF
#1E6B52	AT4G23810	Drought	TF
#FFD602	AT1G55450	Drought and Salt	NON_TF
#1E6B52	AT5G13190	Drought	NON_TF
#1E6B52	AT5G12340	Drought	NON_TF
#1E6B52	AT1G07630	Drought	NON_TF
#1E6B52	AT4G21390	Drought	NON_TF
#1E6B52	AT2G26530	Drought	NON_TF
#1E6B52	AT2G43320	Drought	NON_TF
#1E6B52	AT1G42990	Drought	TF
#1E6B52	AT1G28380	Drought	NON_TF
#1E6B52	AT3G53810	Drought	NON_TF
#1E6B52	AT5G52050	Drought	NON_TF
#1E6B52	AT1G20310	Drought	NON_TF
#1E6B52	AT1G29690	Drought	NON_TF
#1E6B52	AT3G02840	Drought	NON_TF
#1E6B52	AT3G08720	Drought	NON_TF
#1E6B52	AT1G14540	Drought	NON_TF
#1E6B52	AT5G04870	Drought	NON_TF
#1E6B52	AT3G49350	Drought	NON_TF
#1E6B52	AT1G66160	Drought	NON_TF
#1E6B52	AT3G11820	Drought	NON_TF
#FFD602	AT2G24600	Drought and Salt	NON_TF
#1E6B52	AT4G27720	Drought	NON_TF
#1E6B52	AT2G33580	Drought	NON_TF
#FFD602	AT4G02380	Drought and Salt	NON_TF
#1E6B52	AT5G42380	Drought	NON_TF
#1E6B52	AT5G48530	Drought	NON_TF
#FFD602	AT5G17300	Drought and Salt	TF
#1E6B52	AT1G64530	Drought	TF
#1E6B52	AT1G44000	Drought	NON_TF
#FFD602	AT4G15430	Drought and Salt	NON_TF
#1E6B52	AT1G26560	Drought	NON_TF
#1E6B52	AT2G41250	Drought	NON_TF
#1E6B52	AT1G66330	Drought	NON_TF
#FFD602	AT3G17330	Drought and Salt	NON_TF
#FFD602	AT3G57040	Drought and Salt	TF
#1E6B52	AT1G70940	Drought	NON_TF
#1E6B52	AT3G18750	Drought	NON_TF
#1E6B52	AT3G01060	Drought	NON_TF
#FFD602	AT3G02380	Drought and Salt	TF
#FFD602	AT1G55960	Drought and Salt	NON_TF
#FFD602	AT2G03730	Drought and Salt	NON_TF
#1E6B52	AT3G24460	Drought	NON_TF
#1E6B52	AT3G21390	Drought	NON_TF
#FFD602	AT1G76990	Drought and Salt	NON_TF
#1E6B52	AT4G07960	Drought	NON_TF
#1E6B52	AT2G41290	Drought	NON_TF
#1E6B52	AT5G01030	Drought	NON_TF
#1E6B52	AT4G32190	Drought	NON_TF
#1E6B52	AT1G67120	Drought	NON_TF
#1E6B52	AT3G22530	Drought	NON_TF
#1E6B52	AT1G49780	Drought	NON_TF
#1E6B52	AT2G26800	Drought	NON_TF
#FFD602	AT2G37460	Drought and Salt	NON_TF
#1E6B52	AT1G62250	Drought	NON_TF
#1E6B52	AT4G08930	Drought	NON_TF
#FFD602	AT3G55960	Drought and Salt	NON_TF
#1E6B52	AT2G24100	Drought	NON_TF
#FFD602	AT1G01060	Drought and Salt	TF
#1E6B52	AT1G21050	Drought	NON_TF
#1E6B52	AT1G75100	Drought	NON_TF
#1E6B52	AT2G21050	Drought	NON_TF
#A69363	AT2G40400	Salt	NON_TF
#FFD602	AT3G57550	Drought and Salt	NON_TF
#A69363	AT3G49160	Salt	NON_TF
#A69363	AT4G38680	Salt	TF
#A69363	AT3G07565	Salt	NON_TF
#A69363	AT3G13065	Salt	NON_TF
#FFD602	AT4G39770	Drought and Salt	NON_TF
#FFD602	AT4G02200	Drought and Salt	NON_TF
#A69363	AT4G17870	Salt	NON_TF
#A69363	AT1G55805	Salt	NON_TF
#A69363	AT1G32530	Salt	NON_TF
#A69363	AT2G33310	Salt	TF
#FFD602	AT1G21140	Drought and Salt	NON_TF
#A69363	AT3G51870	Salt	NON_TF
#A69363	AT2G27710	Salt	NON_TF
#A69363	AT2G06850	Salt	NON_TF
#A69363	AT1G32460	Salt	NON_TF
#FFD602	AT1G65870	Drought and Salt	NON_TF
#A69363	AT5G44020	Salt	NON_TF
#A69363	AT1G70410	Salt	NON_TF
#A69363	AT5G18650	Salt	NON_TF
#FFD602	AT1G49840	Drought and Salt	NON_TF
#A69363	AT5G20250	Salt	NON_TF
#FFD602	AT1G19450	Drought and Salt	NON_TF
#FFD602	AT1G29660	Drought and Salt	NON_TF
#A69363	AT2G04795	Salt	NON_TF
#A69363	AT3G06750	Salt	NON_TF
#FFD602	AT3G13750	Drought and Salt	NON_TF
#FFD602	AT3G19450	Drought and Salt	NON_TF
#FFD602	AT3G54510	Drought and Salt	NON_TF
#FFD602	AT5G15830	Drought and Salt	TF
#A69363	AT1G02640	Salt	NON_TF
#A69363	AT1G60010	Salt	NON_TF
#A69363	AT5G43320	Salt	NON_TF
#A69363	AT3G13000	Salt	NON_TF
#A69363	AT1G12500	Salt	NON_TF
#FFD602	AT3G13062	Drought and Salt	NON_TF
#FFD602	AT3G15850	Drought and Salt	NON_TF
#FFD602	AT1G33240	Drought and Salt	TF
#FFD602	AT3G50560	Drought and Salt	NON_TF
#FFD602	AT3G45730	Drought and Salt	NON_TF
#A69363	AT3G14770	Salt	NON_TF
#A69363	AT5G13100	Salt	NON_TF
#A69363	AT1G16390	Salt	NON_TF
#A69363	AT2G10940	Salt	NON_TF
#A69363	AT5G57020	Salt	NON_TF
#A69363	AT5G04230	Salt	NON_TF
#FFD602	AT1G07570	Drought and Salt	NON_TF
#A69363	AT4G19160	Salt	NON_TF
#A69363	AT5G15210	Salt	TF
#A69363	AT5G56870	Salt	NON_TF
#A69363	AT1G61900	Salt	NON_TF
#FFD602	AT3G48560	Drought and Salt	NON_TF
#A69363	AT4G25050	Salt	NON_TF
#A69363	AT2G30520	Salt	NON_TF
#A69363	AT2G38310	Salt	NON_TF
#A69363	AT3G53260	Salt	NON_TF
#A69363	AT4G30110	Salt	NON_TF
#A69363	AT1G10470	Salt	TF
#1E6B52	AT1G76040	Drought	NON_TF
#1E6B52	AT3G44400	Drought	NON_TF
#1E6B52	AT2G22080	Drought	NON_TF
#1E6B52	AT4G21940	Drought	NON_TF
#1E6B52	AT2G30250	Drought	TF
#1E6B52	AT3G60260	Drought	NON_TF
#1E6B52	AT1G14370	Drought	NON_TF
#1E6B52	AT3G54200	Drought	NON_TF
#1E6B52	AT1G61610	Drought	NON_TF
#1E6B52	AT5G07070	Drought	NON_TF
#1E6B52	AT1G61800	Drought	NON_TF
#1E6B52	AT2G46940	Drought	NON_TF
#1E6B52	AT4G23190	Drought	NON_TF
#1E6B52	AT5G66640	Drought	NON_TF
#1E6B52	AT2G29440	Drought	NON_TF
#1E6B52	AT4G12000	Drought	NON_TF
#1E6B52	AT4G30290	Drought	NON_TF
#1E6B52	AT1G17420	Drought	NON_TF
#1E6B52	AT5G52750	Drought	NON_TF
#1E6B52	AT1G80840	Drought	TF
#1E6B52	AT4G35110	Drought	NON_TF
#1E6B52	AT4G12040	Drought	NON_TF
#1E6B52	AT5G26030	Drought	NON_TF
#1E6B52	AT1G17380	Drought	TF
#1E6B52	AT5G53050	Drought	NON_TF
#1E6B52	AT4G14365	Drought	NON_TF
#FFD602	AT1G72450	Drought and Salt	TF
#1E6B52	AT5G46410	Drought	NON_TF
#1E6B52	AT1G33260	Drought	NON_TF
#1E6B52	AT2G16900	Drought	NON_TF
#1E6B52	AT3G05640	Drought	NON_TF
#1E6B52	AT3G04630	Drought	NON_TF
#1E6B52	AT5G24030	Drought	NON_TF
#1E6B52	AT2G06050	Drought	NON_TF
#1E6B52	AT3G26980	Drought	NON_TF
#1E6B52	AT3G16860	Drought	NON_TF
#1E6B52	AT4G30996	Drought	NON_TF
#1E6B52	AT2G01450	Drought	NON_TF
#1E6B52	AT5G01540	Drought	NON_TF
#FFD602	AT1G70700	Drought and Salt	TF
#1E6B52	AT4G12410	Drought	NON_TF
#1E6B52	AT2G44500	Drought	NON_TF
#1E6B52	AT1G50640	Drought	TF
#1E6B52	AT5G48450	Drought	NON_TF
#1E6B52	AT5G03720	Drought	TF
#1E6B52	AT5G52310	Drought	NON_TF
#1E6B52	AT5G59730	Drought	NON_TF
#1E6B52	AT5G53760	Drought	NON_TF
#1E6B52	AT1G71697	Drought	NON_TF
#1E6B52	AT4G22780	Drought	NON_TF
#1E6B52	AT4G20880	Drought	NON_TF
#1E6B52	AT1G32640	Drought	TF
#1E6B52	AT3G06150	Drought	NON_TF
#1E6B52	AT3G55430	Drought	NON_TF
#1E6B52	AT4G30210	Drought	NON_TF
#1E6B52	AT4G30280	Drought	NON_TF
#1E6B52	AT4G30600	Drought	NON_TF
#1E6B52	AT1G42470	Drought	NON_TF
#1E6B52	AT3G09830	Drought	NON_TF
#A69363	AT1G62290	Salt	NON_TF
#A69363	AT1G54100	Salt	NON_TF
#A69363	AT1G41830	Salt	NON_TF
#A69363	AT3G43270	Salt	NON_TF
#A69363	AT1G56700	Salt	NON_TF
#A69363	AT5G52280	Salt	NON_TF
#A69363	AT1G47128	Salt	NON_TF
#A69363	AT1G76670	Salt	NON_TF
#A69363	AT1G54050	Salt	NON_TF
#FFD602	AT4G11220	Drought and Salt	NON_TF
#FFD602	AT4G34590	Drought and Salt	TF
#1E6B52	AT4G36910	Drought	NON_TF
#1E6B52	AT1G79410	Drought	NON_TF
#1E6B52	AT4G30890	Drought	NON_TF
#1E6B52	AT1G53280	Drought	NON_TF
#1E6B52	AT1G79110	Drought	NON_TF
#1E6B52	AT4G17090	Drought	NON_TF
#A69363	AT5G62530	Salt	NON_TF
#A69363	AT2G42490	Salt	NON_TF
#A69363	AT1G80130	Salt	NON_TF
#A69363	AT1G62045	Salt	NON_TF
#A69363	AT3G09820	Salt	NON_TF
#A69363	AT1G70780	Salt	NON_TF
#A69363	AT3G21190	Salt	NON_TF
#A69363	AT5G10550	Salt	NON_TF
#A69363	AT1G75760	Salt	NON_TF
#A69363	AT3G16330	Salt	NON_TF
#A69363	AT1G71840	Salt	NON_TF
#A69363	AT5G29000	Salt	TF
#A69363	AT3G16050	Salt	NON_TF
#A69363	AT1G19710	Salt	NON_TF
#A69363	AT5G42570	Salt	NON_TF
#FFD602	AT3G29360	Drought and Salt	NON_TF
#A69363	AT5G53820	Salt	NON_TF
#A69363	AT5G25240	Salt	NON_TF
#A69363	AT5G04410	Salt	TF
#A69363	AT3G06860	Salt	NON_TF
#1E6B52	AT4G17490	Drought	TF
#1E6B52	AT5G42940	Drought	NON_TF
#1E6B52	AT3G19130	Drought	NON_TF
#FFD602	AT1G19380	Drought and Salt	NON_TF
#1E6B52	AT4G24570	Drought	NON_TF
#1E6B52	AT3G25600	Drought	NON_TF
#1E6B52	AT4G02330	Drought	NON_TF
#1E6B52	AT2G27080	Drought	NON_TF
#1E6B52	AT2G41640	Drought	NON_TF
#1E6B52	AT2G39650	Drought	NON_TF
#1E6B52	AT5G59820	Drought	TF
#1E6B52	AT4G34150	Drought	NON_TF
#1E6B52	AT3G22160	Drought	NON_TF
#1E6B52	AT1G74450	Drought	NON_TF
#FFD602	AT5G04340	Drought and Salt	TF
#1E6B52	AT4G24110	Drought	NON_TF
#1E6B52	AT3G52800	Drought	NON_TF
#1E6B52	AT3G46620	Drought	NON_TF
#1E6B52	AT1G27730	Drought	TF
#1E6B52	AT4G27350	Drought	NON_TF
#1E6B52	AT2G40140	Drought	TF
#1E6B52	AT4G29780	Drought	NON_TF
#FFD602	AT5G16820	Drought and Salt	TF
#FFD602	AT4G14270	Drought and Salt	NON_TF
#1E6B52	AT2G22660	Drought	NON_TF
#1E6B52	AT2G20740	Drought	NON_TF
#1E6B52	AT3G56720	Drought	NON_TF
#1E6B52	AT3G57050	Drought	NON_TF
#1E6B52	AT2G21240	Drought	TF
#1E6B52	AT1G79500	Drought	NON_TF
#1E6B52	AT4G33090	Drought	NON_TF
#1E6B52	AT3G60130	Drought	NON_TF
#1E6B52	AT2G29020	Drought	NON_TF
#1E6B52	AT4G34030	Drought	NON_TF
#1E6B52	AT1G69830	Drought	NON_TF
#1E6B52	AT5G47020	Drought	NON_TF
#1E6B52	AT1G05380	Drought	TF
#1E6B52	AT2G27200	Drought	NON_TF
#1E6B52	AT2G39900	Drought	TF
#1E6B52	AT1G74410	Drought	NON_TF
#1E6B52	AT3G45770	Drought	NON_TF
#1E6B52	AT4G22540	Drought	NON_TF
#1E6B52	AT5G49555	Drought	NON_TF
#1E6B52	AT2G07180	Drought	NON_TF
#FFD602	AT4G02370	Drought and Salt	NON_TF
#1E6B52	AT4G29010	Drought	NON_TF
#1E6B52	AT1G61670	Drought	NON_TF
#1E6B52	AT1G73980	Drought	NON_TF
#1E6B52	AT1G76150	Drought	NON_TF
#1E6B52	AT5G57655	Drought	NON_TF
#1E6B52	AT3G17020	Drought	NON_TF
#1E6B52	AT2G39920	Drought	NON_TF
#1E6B52	AT5G61530	Drought	NON_TF
#1E6B52	AT1G02305	Drought	NON_TF
#1E6B52	AT5G10790	Drought	NON_TF
#1E6B52	AT2G45560	Drought	NON_TF
#1E6B52	AT1G12845	Drought	NON_TF
#1E6B52	AT3G59820	Drought	NON_TF
#1E6B52	AT5G61040	Drought	NON_TF
#1E6B52	AT1G72340	Drought	NON_TF
#1E6B52	AT5G27380	Drought	NON_TF
#1E6B52	AT2G31800	Drought	NON_TF
#1E6B52	AT2G02570	Drought	NON_TF
#1E6B52	AT2G02760	Drought	NON_TF
#1E6B52	AT4G33490	Drought	NON_TF
#FFD602	AT4G33670	Drought and Salt	NON_TF
#1E6B52	AT3G06483	Drought	NON_TF
#1E6B52	AT1G50940	Drought	NON_TF
#1E6B52	AT5G45610	Drought	NON_TF
#1E6B52	AT1G05805	Drought	TF
#1E6B52	AT5G55230	Drought	NON_TF
#1E6B52	AT4G17150	Drought	NON_TF
#1E6B52	AT1G51940	Drought	NON_TF
#1E6B52	AT5G66880	Drought	NON_TF
#1E6B52	AT1G51610	Drought	NON_TF
#1E6B52	AT1G77000	Drought	NON_TF
#1E6B52	AT5G65760	Drought	NON_TF
#1E6B52	AT1G48790	Drought	NON_TF
#1E6B52	AT1G75190	Drought	NON_TF
#1E6B52	AT1G13990	Drought	NON_TF
#1E6B52	AT5G06690	Drought	NON_TF
#1E6B52	AT5G27280	Drought	NON_TF
#1E6B52	AT2G39930	Drought	NON_TF
#1E6B52	AT5G59250	Drought	NON_TF
#1E6B52	AT1G69390	Drought	NON_TF
#1E6B52	AT2G33150	Drought	NON_TF
#1E6B52	AT2G21430	Drought	NON_TF
#1E6B52	AT1G02260	Drought	NON_TF
#1E6B52	AT5G43440	Drought	NON_TF
#1E6B52	AT3G50500	Drought	NON_TF
#1E6B52	AT2G15960	Drought	NON_TF
#1E6B52	AT2G46240	Drought	NON_TF
#FFD602	AT1G10760	Drought and Salt	NON_TF
#1E6B52	AT4G36630	Drought	NON_TF
#FFD602	AT1G49720	Drought and Salt	TF
#1E6B52	AT2G14170	Drought	NON_TF
#1E6B52	AT5G19330	Drought	TF
#1E6B52	AT3G19640	Drought	NON_TF
#1E6B52	AT3G19553	Drought	NON_TF
#1E6B52	AT3G22740	Drought	NON_TF
#1E6B52	AT1G22620	Drought	NON_TF
#1E6B52	AT4G17100	Drought	NON_TF
#FFD602	AT5G27930	Drought and Salt	NON_TF
#1E6B52	AT1G68820	Drought	NON_TF
#A69363	AT1G51890	Salt	NON_TF
#A69363	AT5G57630	Salt	NON_TF
#1E6B52	AT3G23250	Drought	TF
#1E6B52	AT5G54170	Drought	NON_TF
#FFD602	AT3G01830	Drought and Salt	NON_TF
#1E6B52	AT3G55500	Drought	NON_TF
#1E6B52	AT1G65390	Drought	NON_TF
#1E6B52	AT4G20860	Drought	NON_TF
#1E6B52	AT4G31550	Drought	TF
#1E6B52	AT3G48720	Drought	NON_TF
#1E6B52	AT3G50910	Drought	NON_TF
#1E6B52	AT4G25390	Drought	NON_TF
#1E6B52	AT1G07720	Drought	NON_TF
#1E6B52	AT3G63010	Drought	NON_TF
#1E6B52	AT1G69010	Drought	TF
#1E6B52	AT2G24540	Drought	NON_TF
#1E6B52	AT1G79270	Drought	NON_TF
#1E6B52	AT1G06570	Drought	NON_TF
#1E6B52	AT2G39450	Drought	NON_TF
#FFD602	AT5G15850	Drought and Salt	TF
#1E6B52	AT5G43150	Drought	NON_TF
#FFD602	AT5G66730	Drought and Salt	TF
#1E6B52	AT3G63120	Drought	NON_TF
#1E6B52	AT2G40890	Drought	NON_TF
#1E6B52	AT4G14350	Drought	NON_TF
#1E6B52	AT3G10050	Drought	NON_TF
#1E6B52	AT2G36870	Drought	NON_TF
#1E6B52	AT5G44670	Drought	NON_TF
#1E6B52	AT2G41040	Drought	NON_TF
#1E6B52	AT5G50100	Drought	NON_TF
#1E6B52	AT5G47560	Drought	NON_TF
#A69363	AT3G61440	Salt	NON_TF
#FFD602	AT3G24520	Drought and Salt	TF
#1E6B52	AT3G14440	Drought	NON_TF
#1E6B52	AT4G26080	Drought	NON_TF
#1E6B52	AT3G47540	Drought	NON_TF
#1E6B52	AT5G64660	Drought	NON_TF
#1E6B52	AT1G01720	Drought	TF
#1E6B52	AT1G10560	Drought	NON_TF
#1E6B52	AT1G53170	Drought	TF
#FFD602	AT4G27410	Drought and Salt	TF
#FFD602	AT1G69270	Drought and Salt	NON_TF
#1E6B52	AT1G76380	Drought	NON_TF
#1E6B52	AT1G59910	Drought	NON_TF
#1E6B52	AT3G12400	Drought	NON_TF
#1E6B52	AT3G62260	Drought	TF
#1E6B52	AT5G16200	Drought	NON_TF
#1E6B52	AT1G73805	Drought	NON_TF
#1E6B52	AT5G37540	Drought	NON_TF
#1E6B52	AT1G51700	Drought	TF
#1E6B52	AT3G57530	Drought	NON_TF
#1E6B52	AT2G41630	Drought	NON_TF
#1E6B52	AT1G30690	Drought	NON_TF
#1E6B52	AT4G37790	Drought	TF
#FFD602	AT2G23810	Drought and Salt	NON_TF
#1E6B52	AT5G04550	Drought	NON_TF
#1E6B52	AT5G62570	Drought	NON_TF
#1E6B52	AT1G12580	Drought	NON_TF
#1E6B52	AT3G56880	Drought	NON_TF
#FFD602	AT4G01950	Drought and Salt	NON_TF
#1E6B52	AT5G47960	Drought	NON_TF
#1E6B52	AT3G44260	Drought	NON_TF
#FFD602	AT5G04720	Drought and Salt	NON_TF
#1E6B52	AT1G73500	Drought	NON_TF
#1E6B52	AT3G18710	Drought	NON_TF
#1E6B52	AT5G45340	Drought	NON_TF
#1E6B52	AT5G54490	Drought	NON_TF
#1E6B52	AT1G27340	Drought	NON_TF
#1E6B52	AT1G48650	Drought	NON_TF
#1E6B52	AT1G54270	Drought	NON_TF
#1E6B52	AT3G22840	Drought	NON_TF
#1E6B52	AT4G37910	Drought	NON_TF
#1E6B52	AT1G63750	Drought	NON_TF
#1E6B52	AT4G33920	Drought	NON_TF
#1E6B52	AT1G48320	Drought	NON_TF
#1E6B52	AT1G67880	Drought	NON_TF
#1E6B52	AT5G06320	Drought	NON_TF
#1E6B52	AT3G61620	Drought	NON_TF
#1E6B52	AT1G71890	Drought	NON_TF
#1E6B52	AT5G37770	Drought	NON_TF
#1E6B52	AT2G25690	Drought	NON_TF
#FFD602	AT4G17500	Drought and Salt	TF
#1E6B52	AT4G25810	Drought	NON_TF
#1E6B52	AT4G31000	Drought	NON_TF
#1E6B52	AT5G19820	Drought	NON_TF
#1E6B52	AT5G24580	Drought	NON_TF
#1E6B52	AT5G25170	Drought	NON_TF
#1E6B52	AT4G32460	Drought	NON_TF
#1E6B52	AT3G28340	Drought	NON_TF
#1E6B52	AT5G20230	Drought	NON_TF
#1E6B52	AT3G55980	Drought	TF
#1E6B52	AT3G61640	Drought	NON_TF
#1E6B52	AT3G24530	Drought	NON_TF
#1E6B52	AT1G68410	Drought	NON_TF
#1E6B52	AT4G13050	Drought	NON_TF
#1E6B52	AT3G62720	Drought	NON_TF
#1E6B52	AT3G19380	Drought	NON_TF
#1E6B52	AT3G12910	Drought	TF
#1E6B52	AT5G13200	Drought	NON_TF
#1E6B52	AT5G52320	Drought	NON_TF
#1E6B52	AT4G12720	Drought	NON_TF
#1E6B52	AT1G09970	Drought	NON_TF
#1E6B52	AT5G12010	Drought	NON_TF
#1E6B52	AT1G01480	Drought	NON_TF
#1E6B52	AT1G80820	Drought	NON_TF
#1E6B52	AT2G28550	Drought	TF
#1E6B52	AT5G09800	Drought	NON_TF
#1E6B52	AT4G28490	Drought	NON_TF
#1E6B52	AT2G27310	Drought	NON_TF
#FFD602	AT2G28810	Drought and Salt	TF
#1E6B52	AT1G29400	Drought	NON_TF
#1E6B52	AT4G14340	Drought	NON_TF
#1E6B52	AT1G79620	Drought	NON_TF
#1E6B52	AT3G06420	Drought	NON_TF
#1E6B52	AT1G65040	Drought	NON_TF
#FFD602	AT5G17520	Drought and Salt	NON_TF
#A69363	AT2G18760	Salt	TF
#1E6B52	AT3G14340	Drought	NON_TF
#1E6B52	AT1G52880	Drought	TF
#FFD602	AT4G34000	Drought and Salt	TF
#A69363	AT2G28470	Salt	NON_TF
#A69363	AT2G24420	Salt	NON_TF
#A69363	AT5G11230	Salt	NON_TF
#A69363	AT4G35860	Salt	NON_TF
#1E6B52	AT2G46400	Drought	TF
#1E6B52	AT1G05575	Drought	NON_TF
#1E6B52	AT1G64390	Drought	NON_TF
#1E6B52	AT4G39670	Drought	NON_TF
#1E6B52	AT4G02410	Drought	NON_TF
#1E6B52	AT1G29340	Drought	NON_TF
#1E6B52	AT5G15870	Drought	NON_TF
#FFD602	AT3G50700	Drought and Salt	TF
#1E6B52	AT1G08980	Drought	NON_TF
#1E6B52	AT5G11580	Drought	NON_TF
#FFD602	AT1G66410	Drought and Salt	NON_TF
#1E6B52	AT2G21380	Drought	NON_TF
#FFD602	AT4G17140	Drought and Salt	NON_TF
#1E6B52	AT5G03050	Drought	NON_TF
#1E6B52	AT1G06460	Drought	NON_TF
#1E6B52	AT5G37780	Drought	NON_TF
#1E6B52	AT5G17190	Drought	NON_TF
#1E6B52	AT3G52070	Drought	NON_TF
#1E6B52	AT2G22980	Drought	NON_TF
#FFD602	AT2G36390	Drought and Salt	NON_TF
#1E6B52	AT5G62360	Drought	NON_TF
#1E6B52	AT2G28900	Drought	NON_TF
#1E6B52	AT3G55260	Drought	NON_TF
#1E6B52	AT4G11360	Drought	NON_TF
#1E6B52	AT2G29960	Drought	NON_TF
#1E6B52	AT3G47860	Drought	NON_TF
#1E6B52	AT3G22200	Drought	NON_TF
#FFD602	AT5G09630	Drought and Salt	NON_TF
#1E6B52	AT5G47230	Drought	TF
#1E6B52	AT5G15200	Drought	NON_TF
#1E6B52	AT3G02140	Drought	NON_TF
#1E6B52	AT3G10930	Drought	NON_TF
#1E6B52	AT5G17350	Drought	NON_TF
#1E6B52	AT3G49530	Drought	TF
#1E6B52	AT5G59450	Drought	TF
#1E6B52	AT3G54130	Drought	NON_TF
#FFD602	AT5G58430	Drought and Salt	NON_TF
#1E6B52	AT3G47080	Drought	NON_TF
#1E6B52	AT3G05200	Drought	NON_TF
#1E6B52	AT3G26910	Drought	NON_TF
#1E6B52	AT5G63130	Drought	NON_TF
#FFD602	AT2G38470	Drought and Salt	TF
#FFD602	AT5G64310	Drought and Salt	NON_TF
#1E6B52	AT5G41100	Drought	NON_TF
#1E6B52	AT1G09070	Drought	NON_TF
#1E6B52	AT5G38210	Drought	NON_TF
#FFD602	AT1G66090	Drought and Salt	NON_TF
#1E6B52	AT5G67450	Drought	TF
#FFD602	AT5G57220	Drought and Salt	NON_TF
#1E6B52	AT1G07870	Drought	NON_TF
#FFD602	AT5G47220	Drought and Salt	TF
#1E6B52	AT1G48100	Drought	NON_TF
#1E6B52	AT5G63790	Drought	TF
#1E6B52	AT3G02800	Drought	NON_TF
#1E6B52	AT1G70740	Drought	NON_TF
#1E6B52	AT2G28400	Drought	NON_TF
#1E6B52	AT5G66850	Drought	NON_TF
#1E6B52	AT1G71950	Drought	NON_TF
#1E6B52	AT1G31130	Drought	NON_TF
#1E6B52	AT1G51820	Drought	NON_TF
#1E6B52	AT3G14050	Drought	NON_TF
#1E6B52	AT4G31750	Drought	NON_TF
#1E6B52	AT2G37110	Drought	NON_TF
#1E6B52	AT1G78210	Drought	NON_TF
#1E6B52	AT1G02400	Drought	NON_TF
#1E6B52	AT2G40180	Drought	NON_TF
#1E6B52	AT1G05100	Drought	NON_TF
#1E6B52	AT5G54860	Drought	NON_TF
#1E6B52	AT3G03050	Drought	NON_TF
#FFD602	AT2G32190	Drought and Salt	NON_TF
#1E6B52	AT5G60890	Drought	TF
#1E6B52	AT1G56060	Drought	NON_TF
#FFD602	AT5G56980	Drought and Salt	NON_TF
#FFD602	AT4G05100	Drought and Salt	TF
#1E6B52	AT1G30040	Drought	NON_TF
#1E6B52	AT3G55840	Drought	NON_TF
#1E6B52	AT1G04220	Drought	NON_TF
#1E6B52	AT3G05650	Drought	NON_TF
#1E6B52	AT1G27910	Drought	NON_TF
#1E6B52	AT1G58420	Drought	NON_TF
#1E6B52	AT1G01560	Drought	NON_TF
#A69363	AT2G36640	Salt	NON_TF
#A69363	AT3G01590	Salt	NON_TF
#A69363	AT3G10340	Salt	NON_TF
#1E6B52	AT4G37370	Drought	NON_TF
#1E6B52	AT4G29740	Drought	NON_TF
#1E6B52	AT4G31800	Drought	TF
#1E6B52	AT3G24350	Drought	NON_TF
#1E6B52	AT4G35985	Drought	NON_TF
#1E6B52	AT1G01260	Drought	TF
#1E6B52	AT5G16830	Drought	NON_TF
#1E6B52	AT3G05580	Drought	NON_TF
#1E6B52	AT3G21700	Drought	NON_TF
#1E6B52	AT3G25250	Drought	NON_TF
#FFD602	AT3G29320	Drought and Salt	NON_TF
#1E6B52	AT2G15970	Drought	NON_TF
#1E6B52	AT1G22740	Drought	NON_TF
#1E6B52	AT2G42790	Drought	NON_TF
#FFD602	AT1G22370	Drought and Salt	NON_TF
#1E6B52	AT1G07040	Drought	NON_TF
#1E6B52	AT5G10780	Drought	NON_TF
#FFD602	AT3G12490	Drought and Salt	NON_TF
#FFD602	AT3G18080	Drought and Salt	NON_TF
#1E6B52	AT3G19490	Drought	NON_TF
#FFD602	AT5G05200	Drought and Salt	NON_TF
#FFD602	AT3G01310	Drought and Salt	NON_TF
#FFD602	AT2G40840	Drought and Salt	NON_TF
#1E6B52	AT4G27440	Drought	NON_TF
#1E6B52	AT3G62660	Drought	NON_TF
#1E6B52	AT1G57540	Drought	NON_TF
#FFD602	AT1G22070	Drought and Salt	NON_TF
#FFD602	AT1G75800	Drought and Salt	NON_TF
#1E6B52	AT5G02160	Drought	NON_TF
#1E6B52	AT2G40940	Drought	NON_TF
#FFD602	AT3G53800	Drought and Salt	NON_TF
#A69363	AT5G02860	Salt	NON_TF
#A69363	AT4G01040	Salt	NON_TF
#1E6B52	AT5G44210	Drought	TF
#1E6B52	AT1G33590	Drought	NON_TF
#1E6B52	AT5G57710	Drought	NON_TF
#1E6B52	AT2G38360	Drought	NON_TF
#1E6B52	AT5G05300	Drought	NON_TF
#1E6B52	AT2G20880	Drought	TF
#FFD602	AT3G09600	Drought and Salt	TF
#1E6B52	AT2G34460	Drought	NON_TF
#1E6B52	AT3G24170	Drought	NON_TF
#1E6B52	AT1G78580	Drought	NON_TF
#1E6B52	AT1G60540	Drought	NON_TF
#1E6B52	AT3G26570	Drought	NON_TF
#1E6B52	AT2G30490	Drought	NON_TF
#1E6B52	AT4G30950	Drought	NON_TF
#1E6B52	AT5G54130	Drought	NON_TF
#1E6B52	AT3G29030	Drought	NON_TF
#1E6B52	AT2G34720	Drought	TF
#1E6B52	AT5G53200	Drought	TF
#1E6B52	AT1G10740	Drought	NON_TF
#1E6B52	AT5G62130	Drought	NON_TF
#1E6B52	AT1G77090	Drought	NON_TF
#1E6B52	AT2G01890	Drought	NON_TF
#1E6B52	AT5G47050	Drought	NON_TF
#FFD602	AT1G02820	Drought and Salt	NON_TF
#1E6B52	AT3G51750	Drought	NON_TF
#1E6B52	AT3G22540	Drought	NON_TF
#1E6B52	AT2G21320	Drought	TF
#1E6B52	AT3G27350	Drought	NON_TF
#A69363	AT5G01740	Salt	NON_TF
#A69363	AT2G48020	Salt	NON_TF
#A69363	AT1G32440	Salt	NON_TF
#A69363	AT1G64490	Salt	NON_TF
#1E6B52	AT4G26480	Drought	NON_TF
#1E6B52	AT1G69530	Drought	NON_TF
#FFD602	AT5G16590	Drought and Salt	NON_TF
#1E6B52	AT5G17230	Drought	NON_TF
#1E6B52	AT5G48760	Drought	NON_TF
#1E6B52	AT2G21650	Drought	NON_TF
#1E6B52	AT5G04280	Drought	NON_TF
#1E6B52	AT1G67700	Drought	NON_TF
#1E6B52	AT4G18970	Drought	NON_TF
#1E6B52	AT2G38730	Drought	NON_TF
#1E6B52	AT5G64850	Drought	NON_TF
#FFD602	AT4G39780	Drought and Salt	TF
#1E6B52	AT1G65490	Drought	NON_TF
#1E6B52	AT3G21110	Drought	NON_TF
#A69363	AT1G66200	Salt	NON_TF
#A69363	AT5G17310	Salt	NON_TF
#A69363	AT5G14760	Salt	NON_TF
#1E6B52	AT5G53750	Drought	NON_TF
#1E6B52	AT1G35230	Drought	NON_TF
#1E6B52	AT3G25180	Drought	NON_TF
#FFD602	AT3G26580	Drought and Salt	NON_TF
#A69363	AT3G62750	Salt	NON_TF
#A69363	AT4G37470	Salt	NON_TF
#A69363	AT4G35480	Salt	NON_TF
#A69363	AT3G53180	Salt	NON_TF
#A69363	AT5G19540	Salt	NON_TF
#1E6B52	AT5G08520	Drought	TF
#FFD602	AT3G10120	Drought and Salt	NON_TF
#1E6B52	AT3G22970	Drought	NON_TF
#1E6B52	AT1G68560	Drought	NON_TF
#FFD602	AT1G77210	Drought and Salt	NON_TF
#1E6B52	AT1G60140	Drought	NON_TF
#1E6B52	AT3G58750	Drought	NON_TF
#1E6B52	AT4G18930	Drought	NON_TF
#1E6B52	AT1G04400	Drought	NON_TF
#1E6B52	AT5G35170	Drought	NON_TF
#1E6B52	AT3G51390	Drought	NON_TF
#1E6B52	AT2G28660	Drought	NON_TF
#FFD602	AT1G24440	Drought and Salt	NON_TF
#1E6B52	AT5G03470	Drought	NON_TF
#1E6B52	AT5G64920	Drought	NON_TF
#1E6B52	AT5G43810	Drought	NON_TF
#1E6B52	AT5G18590	Drought	NON_TF
#1E6B52	AT2G43535	Drought	NON_TF
#1E6B52	AT2G46550	Drought	NON_TF
#1E6B52	AT3G52840	Drought	NON_TF
#1E6B52	AT4G04340	Drought	NON_TF
#1E6B52	AT3G47160	Drought	NON_TF
#1E6B52	AT3G57470	Drought	NON_TF
#1E6B52	AT5G18640	Drought	NON_TF
#1E6B52	AT4G30690	Drought	NON_TF
#1E6B52	AT4G39090	Drought	NON_TF
#1E6B52	AT1G12780	Drought	NON_TF
#1E6B52	AT1G49300	Drought	NON_TF
#FFD602	AT4G05150	Drought and Salt	NON_TF
#1E6B52	AT1G26580	Drought	NON_TF
#1E6B52	AT1G30360	Drought	NON_TF
#1E6B52	AT1G16840	Drought	NON_TF
#1E6B52	AT1G08660	Drought	NON_TF
#1E6B52	AT1G52140	Drought	NON_TF
#FFD602	AT1G70820	Drought and Salt	NON_TF
#A69363	AT2G33380	Salt	NON_TF
#1E6B52	AT3G50060	Drought	TF
#1E6B52	AT3G04640	Drought	NON_TF
#FFD602	AT3G46600	Drought and Salt	TF
#1E6B52	AT1G66400	Drought	NON_TF
#FFD602	AT3G18560	Drought and Salt	NON_TF
#1E6B52	AT5G50915	Drought	TF
#1E6B52	AT1G02660	Drought	NON_TF
#1E6B52	AT1G63160	Drought	NON_TF
#1E6B52	AT3G19030	Drought	NON_TF
#1E6B52	AT1G77250	Drought	TF
#FFD602	AT4G25620	Drought and Salt	NON_TF
#1E6B52	AT1G78080	Drought	TF
#1E6B52	AT4G32030	Drought	NON_TF
#1E6B52	AT3G11650	Drought	NON_TF
#1E6B52	AT4G11280	Drought	NON_TF
#1E6B52	AT1G22190	Drought	TF
#FFD602	AT2G40000	Drought and Salt	NON_TF
#1E6B52	AT2G41010	Drought	NON_TF
#1E6B52	AT1G53910	Drought	TF
#1E6B52	AT2G42040	Drought	TF
#FFD602	AT5G01210	Drought and Salt	NON_TF
#1E6B52	AT1G19740	Drought	NON_TF
#FFD602	AT2G42530	Drought and Salt	NON_TF
#1E6B52	AT3G55760	Drought	NON_TF
#1E6B52	AT1G66350	Drought	TF
#1E6B52	AT1G27930	Drought	NON_TF
#1E6B52	AT1G53230	Drought	TF
#FFD602	AT3G24760	Drought and Salt	NON_TF
#1E6B52	AT4G29080	Drought	TF
#1E6B52	AT3G63060	Drought	NON_TF
#1E6B52	AT2G47770	Drought	NON_TF
#1E6B52	AT1G76600	Drought	NON_TF
#1E6B52	AT3G16720	Drought	NON_TF
#1E6B52	AT4G24380	Drought	NON_TF
#1E6B52	AT1G11050	Drought	NON_TF
#A69363	AT2G25200	Salt	NON_TF
#1E6B52	AT5G24110	Drought	TF
#1E6B52	AT1G76970	Drought	NON_TF
#1E6B52	AT2G18690	Drought	NON_TF
#1E6B52	AT1G16420	Drought	NON_TF
#1E6B52	AT5G17000	Drought	NON_TF
#1E6B52	AT1G28480	Drought	NON_TF
#1E6B52	AT4G18950	Drought	NON_TF
#FFD602	AT5G25190	Drought and Salt	TF
#FFD602	AT2G24790	Drought and Salt	TF
#FFD602	AT4G01250	Drought and Salt	TF
#1E6B52	AT1G75470	Drought	NON_TF
#1E6B52	AT3G15530	Drought	NON_TF
#FFD602	AT5G62020	Drought and Salt	TF
#A69363	AT2G37950	Salt	NON_TF
#A69363	AT3G06080	Salt	NON_TF
#FFD602	AT2G25900	Drought and Salt	TF
#A69363	AT3G02550	Salt	TF
#A69363	AT5G19120	Salt	NON_TF
#FFD602	AT2G40330	Drought and Salt	NON_TF
#A69363	AT1G31290	Salt	NON_TF
#A69363	AT2G30040	Salt	NON_TF
#FFD602	AT3G55560	Drought and Salt	NON_TF
#A69363	AT4G10270	Salt	NON_TF
#A69363	AT5G41080	Salt	NON_TF
#FFD602	AT5G28770	Drought and Salt	TF
#A69363	AT5G46780	Salt	NON_TF
#FFD602	AT1G19050	Drought and Salt	TF
#A69363	AT3G62950	Salt	NON_TF
#A69363	AT5G24210	Salt	NON_TF
#A69363	AT3G49810	Salt	NON_TF
#A69363	AT2G18700	Salt	NON_TF
#FFD602	AT5G51190	Drought and Salt	TF
#1E6B52	AT1G31660	Drought	NON_TF
#1E6B52	AT5G58090	Drought	NON_TF
#1E6B52	AT3G57290	Drought	NON_TF
#1E6B52	AT1G10840	Drought	NON_TF
#1E6B52	AT3G23620	Drought	NON_TF
#A69363	AT5G14730	Salt	NON_TF
#1E6B52	AT3G15210	Drought	TF
#1E6B52	AT5G39785	Drought	NON_TF
#1E6B52	AT3G19580	Drought	TF
#1E6B52	AT5G67250	Drought	NON_TF
#FFD602	AT5G61600	Drought and Salt	TF
#1E6B52	AT5G14520	Drought	NON_TF
#1E6B52	AT1G48570	Drought	NON_TF
#1E6B52	AT1G15430	Drought	NON_TF
#1E6B52	AT2G41110	Drought	NON_TF
#1E6B52	AT5G26920	Drought	NON_TF
#1E6B52	AT1G62310	Drought	TF
#1E6B52	AT3G52240	Drought	NON_TF
#FFD602	AT1G69570	Drought and Salt	TF
#1E6B52	AT2G19540	Drought	NON_TF
#1E6B52	AT1G69700	Drought	NON_TF
#1E6B52	AT1G80640	Drought	NON_TF
#1E6B52	AT3G06070	Drought	NON_TF
#1E6B52	AT2G38480	Drought	NON_TF
#1E6B52	AT3G62930	Drought	NON_TF
#FFD602	AT5G18670	Drought and Salt	NON_TF
#FFD602	AT5G58900	Drought and Salt	TF
#1E6B52	AT1G31850	Drought	NON_TF
#1E6B52	AT2G47390	Drought	NON_TF
#1E6B52	AT3G49620	Drought	NON_TF
#1E6B52	AT3G11230	Drought	NON_TF
#1E6B52	AT5G15230	Drought	NON_TF
#1E6B52	AT1G21600	Drought	NON_TF
#1E6B52	AT1G25275	Drought	NON_TF
#1E6B52	AT4G24990	Drought	NON_TF
#1E6B52	AT1G31830	Drought	NON_TF
#1E6B52	AT2G25930	Drought	NON_TF
#1E6B52	AT4G39080	Drought	NON_TF
#1E6B52	AT2G25730	Drought	NON_TF
#1E6B52	AT4G30500	Drought	NON_TF
#1E6B52	AT5G04470	Drought	NON_TF
#1E6B52	AT3G05970	Drought	NON_TF
#A69363	AT1G10090	Salt	NON_TF
#A69363	AT1G65900	Salt	NON_TF
#A69363	AT2G04700	Salt	NON_TF
#1E6B52	AT5G60850	Drought	TF
#1E6B52	AT3G54030	Drought	NON_TF
#1E6B52	AT4G21060	Drought	NON_TF
#1E6B52	AT1G28370	Drought	TF
#1E6B52	AT5G66070	Drought	NON_TF
#1E6B52	AT1G62440	Drought	NON_TF
#1E6B52	AT2G42760	Drought	NON_TF
#1E6B52	AT1G50740	Drought	NON_TF
#FFD602	AT1G49480	Drought and Salt	TF
#1E6B52	AT5G59020	Drought	NON_TF
#1E6B52	AT5G50420	Drought	NON_TF
#1E6B52	AT3G11590	Drought	NON_TF
#1E6B52	AT1G14720	Drought	NON_TF
#1E6B52	AT4G33500	Drought	NON_TF
#A69363	AT4G36970	Salt	NON_TF
#1E6B52	AT2G03340	Drought	TF
#1E6B52	AT4G16710	Drought	NON_TF
#1E6B52	AT4G17486	Drought	NON_TF
#1E6B52	AT3G15360	Drought	NON_TF
#1E6B52	AT3G46970	Drought	NON_TF
#1E6B52	AT5G26880	Drought	NON_TF
#1E6B52	AT4G04330	Drought	NON_TF
#1E6B52	AT1G02560	Drought	NON_TF
#1E6B52	AT1G72050	Drought	TF
#1E6B52	AT3G18600	Drought	NON_TF
#1E6B52	AT2G40360	Drought	NON_TF
#1E6B52	AT4G35950	Drought	NON_TF
#1E6B52	AT1G04170	Drought	NON_TF
#1E6B52	AT3G29200	Drought	NON_TF
#FFD602	AT3G20310	Drought and Salt	TF
#1E6B52	AT5G09760	Drought	NON_TF
#1E6B52	AT1G68690	Drought	NON_TF
#1E6B52	AT2G17480	Drought	NON_TF
#1E6B52	AT1G61660	Drought	TF
#1E6B52	AT4G39640	Drought	NON_TF
#1E6B52	AT1G49430	Drought	NON_TF
#FFD602	AT5G11060	Drought and Salt	TF
#1E6B52	AT1G20620	Drought	NON_TF
#1E6B52	AT3G63210	Drought	NON_TF
#1E6B52	AT2G25450	Drought	NON_TF
#A69363	AT1G49660	Salt	NON_TF
#A69363	AT4G16190	Salt	NON_TF
#A69363	AT4G21960	Salt	NON_TF
#A69363	AT1G18710	Salt	TF
#1E6B52	AT5G46590	Drought	TF
#1E6B52	AT4G18540	Drought	NON_TF
#FFD602	AT5G62470	Drought and Salt	TF
#1E6B52	AT2G27260	Drought	NON_TF
#1E6B52	AT2G17040	Drought	TF
#A69363	AT1G80110	Salt	NON_TF
#A69363	AT1G73390	Salt	NON_TF
#1E6B52	AT5G65310	Drought	TF
#1E6B52	AT3G04070	Drought	TF
#1E6B52	AT1G72680	Drought	NON_TF
#1E6B52	AT5G20950	Drought	NON_TF
#1E6B52	AT1G73790	Drought	NON_TF
#1E6B52	AT3G13670	Drought	NON_TF
#1E6B52	AT4G36760	Drought	NON_TF
#1E6B52	AT5G06839	Drought	TF
#1E6B52	AT1G74110	Drought	NON_TF
#1E6B52	AT2G19500	Drought	NON_TF
#1E6B52	AT1G69490	Drought	TF
#A69363	AT5G52640	Salt	NON_TF
#A69363	AT2G13770	Salt	NON_TF
#A69363	AT3G53230	Salt	NON_TF
#A69363	AT1G52560	Salt	NON_TF
#A69363	AT4G12400	Salt	NON_TF
#A69363	AT3G07090	Salt	NON_TF
#A69363	AT2G34310	Salt	NON_TF
#A69363	AT1G09140	Salt	NON_TF
#A69363	AT2G20560	Salt	NON_TF
#1E6B52	AT1G06160	Drought	TF
#1E6B52	AT5G44420	Drought	NON_TF
#1E6B52	AT4G13510	Drought	NON_TF
#FFD602	AT2G23340	Drought and Salt	TF
#1E6B52	AT1G01610	Drought	NON_TF
#A69363	AT2G25520	Salt	NON_TF
#1E6B52	AT3G46560	Drought	NON_TF
#1E6B52	AT5G62440	Drought	NON_TF
#FFD602	AT1G25550	Drought and Salt	TF
#1E6B52	AT5G46710	Drought	TF
#1E6B52	AT1G19770	Drought	NON_TF
#A69363	AT5G67420	Salt	TF
#A69363	AT4G21510	Salt	NON_TF
#A69363	AT4G01330	Salt	NON_TF
#FFD602	AT1G68840	Drought and Salt	TF
#A69363	AT2G22960	Salt	NON_TF
#A69363	AT2G39705	Salt	NON_TF
#A69363	AT3G06020	Salt	NON_TF
#A69363	AT1G21920	Salt	NON_TF
#A69363	AT2G28630	Salt	NON_TF
#A69363	AT4G12690	Salt	NON_TF
#1E6B52	AT2G45420	Drought	TF
#1E6B52	AT5G61710	Drought	NON_TF
#1E6B52	AT1G06210	Drought	NON_TF
#A69363	AT2G17840	Salt	NON_TF
#1E6B52	AT3G47620	Drought	TF
#FFD602	AT1G43160	Drought and Salt	TF
#1E6B52	AT5G19110	Drought	NON_TF
#1E6B52	AT4G34710	Drought	NON_TF
#1E6B52	AT3G17810	Drought	NON_TF
#1E6B52	AT1G06620	Drought	NON_TF
#A69363	AT4G15530	Salt	NON_TF
#A69363	AT5G65390	Salt	NON_TF
#A69363	AT5G13420	Salt	NON_TF
#A69363	AT5G15450	Salt	NON_TF
#A69363	AT2G31730	Salt	NON_TF
#1E6B52	AT2G32030	Drought	TF
#A69363	AT1G36160	Salt	NON_TF
#1E6B52	AT2G40260	Drought	TF
#1E6B52	AT5G51020	Drought	NON_TF
#FFD602	AT2G02450	Drought and Salt	TF
#1E6B52	AT3G56260	Drought	NON_TF
#1E6B52	AT2G36590	Drought	NON_TF
#1E6B52	AT5G61960	Drought	NON_TF
#A69363	AT5G04770	Salt	NON_TF
#A69363	AT1G68520	Salt	TF
#A69363	AT5G05440	Salt	NON_TF
#A69363	AT5G51550	Salt	NON_TF
#A69363	AT1G23390	Salt	NON_TF
#FFD602	AT5G62920	Drought and Salt	TF
#A69363	AT4G24180	Salt	NON_TF
#A69363	AT5G59430	Salt	NON_TF
#A69363	AT2G20670	Salt	NON_TF
#FFD602	AT2G02080	Drought and Salt	TF
#1E6B52	AT3G26510	Drought	NON_TF
#1E6B52	AT1G76110	Drought	TF
#1E6B52	AT1G71970	Drought	NON_TF
#FFD602	AT5G18630	Drought and Salt	NON_TF
#A69363	AT5G14940	Salt	NON_TF
#1E6B52	AT1G13450	Drought	TF
#1E6B52	AT3G60740	Drought	NON_TF
#1E6B52	AT1G72150	Drought	NON_TF
#FFD602	AT1G77920	Drought and Salt	TF
#1E6B52	AT5G43060	Drought	NON_TF
#1E6B52	AT2G27680	Drought	NON_TF
#1E6B52	AT1G03475	Drought	NON_TF
#1E6B52	AT5G15770	Drought	TF
#1E6B52	AT1G77020	Drought	NON_TF
#1E6B52	AT2G05520	Drought	NON_TF
#1E6B52	AT2G34470	Drought	NON_TF
#1E6B52	AT5G52450	Drought	NON_TF
#FFD602	AT4G38460	Drought and Salt	NON_TF
#1E6B52	AT2G27920	Drought	NON_TF
#1E6B52	AT4G16447	Drought	NON_TF
#1E6B52	AT1G25530	Drought	NON_TF
#1E6B52	AT4G37990	Drought	NON_TF
#A69363	AT1G47710	Salt	NON_TF
#A69363	AT1G13950	Salt	NON_TF
#A69363	AT4G33985	Salt	NON_TF
#A69363	AT5G39730	Salt	NON_TF
#A69363	AT3G62240	Salt	NON_TF
#A69363	AT4G14020	Salt	NON_TF
#A69363	AT1G65430	Salt	NON_TF
#A69363	AT5G51430	Salt	NON_TF
#A69363	AT1G44170	Salt	NON_TF
#A69363	AT1G19690	Salt	NON_TF
#A69363	AT5G42890	Salt	NON_TF
#A69363	AT3G49390	Salt	NON_TF
#A69363	AT1G53310	Salt	NON_TF
#1E6B52	AT1G76590	Drought	TF
#FFD602	AT5G26340	Drought and Salt	NON_TF
#1E6B52	AT5G24590	Drought	TF
#FFD602	AT2G01930	Drought and Salt	TF
#FFD602	AT1G80440	Drought and Salt	NON_TF
#1E6B52	AT2G27050	Drought	TF
#A69363	AT5G57180	Salt	TF
#1E6B52	AT3G24050	Drought	TF
#1E6B52	AT5G55380	Drought	NON_TF
#1E6B52	AT3G05500	Drought	NON_TF
#1E6B52	AT4G36900	Drought	TF
#1E6B52	AT3G53600	Drought	TF
#FFD602	AT1G49010	Drought and Salt	TF
#1E6B52	AT5G07240	Drought	NON_TF
#1E6B52	AT4G28270	Drought	NON_TF
#1E6B52	AT1G78180	Drought	NON_TF
#A69363	AT5G13510	Salt	NON_TF
#A69363	AT1G11860	Salt	NON_TF
#A69363	AT5G42765	Salt	NON_TF
#A69363	AT2G28000	Salt	NON_TF
#A69363	AT2G32640	Salt	NON_TF
#A69363	AT3G55800	Salt	NON_TF
#A69363	AT1G09340	Salt	NON_TF
#A69363	AT5G14740	Salt	NON_TF
#A69363	AT4G28080	Salt	NON_TF
#A69363	AT1G74070	Salt	NON_TF
#A69363	AT3G63410	Salt	NON_TF
#A69363	AT5G20720	Salt	NON_TF
#A69363	AT3G56910	Salt	NON_TF
#A69363	AT4G29060	Salt	NON_TF
#1E6B52	AT3G23690	Drought	TF
#1E6B52	AT1G70000	Drought	TF
#1E6B52	AT2G26590	Drought	NON_TF
#1E6B52	AT2G21330	Drought	NON_TF
#1E6B52	AT1G43700	Drought	TF
#1E6B52	AT4G31410	Drought	NON_TF
#1E6B52	AT1G55330	Drought	NON_TF
#FFD602	AT2G22540	Drought and Salt	TF
#1E6B52	AT3G23080	Drought	NON_TF
#1E6B52	AT1G71030	Drought	TF
#1E6B52	AT2G23840	Drought	NON_TF
#1E6B52	AT3G45780	Drought	NON_TF
#A69363	AT5G16570	Salt	NON_TF
#A69363	AT1G16240	Salt	NON_TF
#A69363	AT5G62170	Salt	NON_TF
#A69363	AT1G24575	Salt	NON_TF
#1E6B52	AT2G28570	Drought	NON_TF
#1E6B52	AT5G47370	Drought	TF
#1E6B52	AT1G67340	Drought	NON_TF
#1E6B52	AT3G49690	Drought	TF
#1E6B52	AT2G43945	Drought	NON_TF
#1E6B52	AT3G12250	Drought	TF
#1E6B52	AT1G13910	Drought	NON_TF
#1E6B52	AT3G15500	Drought	TF
#1E6B52	AT4G27657	Drought	NON_TF
#FFD602	AT4G25490	Drought and Salt	TF
#1E6B52	AT4G01280	Drought	TF
#1E6B52	AT4G30960	Drought	NON_TF
#1E6B52	AT1G15590	Drought	NON_TF
#1E6B52	AT2G01060	Drought	TF
#1E6B52	AT2G17640	Drought	NON_TF
#1E6B52	AT4G35750	Drought	NON_TF
#1E6B52	AT1G28320	Drought	NON_TF
#1E6B52	AT1G65720	Drought	NON_TF
#1E6B52	AT1G26670	Drought	NON_TF
#FFD602	AT2G47070	Drought and Salt	TF
#1E6B52	AT4G30850	Drought	NON_TF
#1E6B52	AT3G02880	Drought	NON_TF
#1E6B52	AT2G35930	Drought	NON_TF
#A69363	AT5G65700	Salt	NON_TF
#1E6B52	AT2G33480	Drought	TF
#1E6B52	AT5G53880	Drought	NON_TF
#FFD602	AT5G39660	Drought and Salt	TF
#FFD602	AT1G49560	Drought and Salt	TF
#1E6B52	AT4G36940	Drought	NON_TF
#1E6B52	AT5G19440	Drought	NON_TF
#FFD602	AT5G36890	Drought and Salt	NON_TF
#A69363	AT5G48370	Salt	NON_TF
#A69363	AT3G05520	Salt	NON_TF
#A69363	AT5G67490	Salt	NON_TF
#A69363	AT5G61570	Salt	NON_TF
#A69363	AT5G25070	Salt	NON_TF
#A69363	AT3G48170	Salt	NON_TF
#A69363	AT4G02500	Salt	NON_TF
#A69363	AT1G05180	Salt	NON_TF
#A69363	AT1G72700	Salt	NON_TF
#A69363	AT5G20280	Salt	NON_TF
#A69363	AT2G18950	Salt	NON_TF
#A69363	AT1G10410	Salt	NON_TF
#A69363	AT5G66420	Salt	NON_TF
#1E6B52	AT1G64620	Drought	TF
#1E6B52	AT4G23850	Drought	NON_TF
#1E6B52	AT3G17800	Drought	NON_TF
#1E6B52	AT5G56160	Drought	NON_TF
#FFD602	AT1G74840	Drought and Salt	TF
#1E6B52	AT5G56100	Drought	NON_TF
#FFD602	AT1G72820	Drought and Salt	NON_TF
#FFD602	AT1G70290	Drought and Salt	NON_TF
#A69363	AT3G07340	Salt	TF
#1E6B52	AT1G62300	Drought	TF
#1E6B52	AT1G70140	Drought	NON_TF
#1E6B52	AT1G03370	Drought	NON_TF
#FFD602	AT2G45660	Drought and Salt	TF
#1E6B52	AT4G27710	Drought	NON_TF
#1E6B52	AT4G35060	Drought	NON_TF
#1E6B52	AT4G12030	Drought	NON_TF
#1E6B52	AT5G32440	Drought	NON_TF
#1E6B52	AT4G15920	Drought	NON_TF
#1E6B52	AT1G58360	Drought	NON_TF
#A69363	AT1G69480	Salt	NON_TF
#FFD602	AT4G17460	Drought and Salt	TF
#A69363	AT3G49780	Salt	NON_TF
#A69363	AT2G26710	Salt	NON_TF
#FFD602	AT2G18450	Drought and Salt	NON_TF
#A69363	AT1G03850	Salt	NON_TF
#A69363	AT1G76890	Salt	TF
#A69363	AT2G44080	Salt	NON_TF
#FFD602	AT5G47390	Drought and Salt	TF
#1E6B52	AT2G38120	Drought	NON_TF
#1E6B52	AT4G22360	Drought	TF
#1E6B52	AT3G07350	Drought	NON_TF
#FFD602	AT3G02170	Drought and Salt	NON_TF
#A69363	AT2G02710	Salt	NON_TF
#A69363	AT1G80920	Salt	NON_TF
#A69363	AT1G70590	Salt	NON_TF
#A69363	AT1G49500	Salt	NON_TF
#FFD602	AT2G20180	Drought and Salt	TF
#A69363	AT5G04190	Salt	NON_TF
#A69363	AT5G52900	Salt	NON_TF
#A69363	AT3G29670	Salt	NON_TF
#A69363	AT4G37590	Salt	NON_TF
#1E6B52	AT2G46710	Drought	NON_TF
#A69363	AT3G23030	Salt	TF
#FFD602	AT4G27450	Drought and Salt	NON_TF
#A69363	AT1G03610	Salt	NON_TF
#1E6B52	AT5G02840	Drought	TF
#FFD602	AT4G12980	Drought and Salt	NON_TF
#1E6B52	AT2G35260	Drought	NON_TF
#1E6B52	AT1G68320	Drought	TF
#FFD602	AT5G25390	Drought and Salt	TF
#1E6B52	AT3G09470	Drought	NON_TF
#A69363	AT5G08100	Salt	NON_TF
#A69363	AT1G09795	Salt	NON_TF
#A69363	AT3G10850	Salt	NON_TF
#A69363	AT5G41460	Salt	NON_TF
#A69363	AT1G66430	Salt	NON_TF
#A69363	AT1G74520	Salt	NON_TF
#FFD602	AT3G50410	Drought and Salt	TF
#1E6B52	AT4G12790	Drought	NON_TF
#A69363	AT4G13720	Salt	NON_TF
#A69363	AT4G39900	Salt	NON_TF
#A69363	AT1G01390	Salt	NON_TF
#1E6B52	AT4G18390	Drought	TF
#1E6B52	AT4G03400	Drought	NON_TF
#FFD602	AT1G19000	Drought and Salt	TF
#1E6B52	AT1G22290	Drought	NON_TF
#1E6B52	AT5G03130	Drought	NON_TF
#1E6B52	AT1G20640	Drought	TF
#1E6B52	AT4G33666	Drought	NON_TF
#1E6B52	AT1G48260	Drought	NON_TF
#FFD602	AT5G48490	Drought and Salt	NON_TF
#A69363	AT1G69160	Salt	NON_TF
#A69363	AT5G58350	Salt	NON_TF
#A69363	AT3G59060	Salt	TF
#A69363	AT5G55970	Salt	NON_TF
#A69363	AT5G22390	Salt	NON_TF
#FFD602	AT4G23750	Drought and Salt	TF
#1E6B52	AT4G39990	Drought	NON_TF
#1E6B52	AT3G61190	Drought	NON_TF
#1E6B52	AT5G35620	Drought	NON_TF
#A69363	AT5G02450	Salt	NON_TF
#A69363	AT2G41100	Salt	NON_TF
#FFD602	AT2G46680	Drought and Salt	TF
#1E6B52	AT3G05830	Drought	NON_TF
#A69363	AT5G02230	Salt	NON_TF
#A69363	AT5G53710	Salt	NON_TF
#A69363	AT3G21240	Salt	NON_TF
#A69363	AT3G44280	Salt	NON_TF
#A69363	AT2G21830	Salt	NON_TF
#A69363	AT1G27200	Salt	NON_TF
#A69363	AT2G04350	Salt	NON_TF
#A69363	AT1G72240	Salt	NON_TF
#A69363	AT4G30490	Salt	NON_TF
#A69363	AT5G57610	Salt	NON_TF
#A69363	AT3G14560	Salt	NON_TF
#A69363	AT4G04800	Salt	NON_TF
#A69363	AT3G22370	Salt	NON_TF
#FFD602	AT1G21910	Drought and Salt	TF
#1E6B52	AT1G25400	Drought	NON_TF
#1E6B52	AT1G04040	Drought	NON_TF
#A69363	AT5G67190	Salt	TF
#A69363	AT4G34138	Salt	NON_TF
#1E6B52	AT1G74930	Drought	TF
#1E6B52	AT2G43010	Drought	TF
#1E6B52	AT3G06780	Drought	NON_TF
#1E6B52	AT1G31630	Drought	TF
#1E6B52	AT1G68440	Drought	NON_TF
#A69363	AT1G12020	Salt	NON_TF
#A69363	AT5G01600	Salt	NON_TF
#1E6B52	AT2G28200	Drought	TF
#1E6B52	AT5G46790	Drought	NON_TF
#1E6B52	AT3G60530	Drought	TF
#1E6B52	AT2G37430	Drought	TF
#1E6B52	AT4G33050	Drought	NON_TF
#1E6B52	AT2G35940	Drought	TF
#1E6B52	AT2G29450	Drought	NON_TF
#1E6B52	AT3G15270	Drought	TF
#1E6B52	AT1G69970	Drought	NON_TF
#FFD602	AT3G61890	Drought and Salt	TF
#A69363	AT1G56580	Salt	NON_TF
#1E6B52	AT1G12610	Drought	TF
#1E6B52	AT5G24930	Drought	TF
#A69363	AT5G52250	Salt	NON_TF
#A69363	AT1G01930	Salt	NON_TF
#A69363	AT2G35800	Salt	NON_TF
#A69363	AT2G39870	Salt	NON_TF
#1E6B52	AT3G10500	Drought	TF
#1E6B52	AT3G60420	Drought	NON_TF
#FFD602	AT1G06180	Drought and Salt	TF
#1E6B52	AT1G29880	Drought	NON_TF
#A69363	AT5G50360	Salt	NON_TF
#1E6B52	AT2G24570	Drought	TF
#1E6B52	AT4G00050	Drought	TF
#1E6B52	AT4G01720	Drought	TF
#1E6B52	AT5G11090	Drought	NON_TF
#1E6B52	AT1G34190	Drought	TF
#1E6B52	AT5G18850	Drought	NON_TF
#1E6B52	AT5G49330	Drought	TF
#1E6B52	AT1G65060	Drought	NON_TF
#FFD602	AT2G22430	Drought and Salt	TF
#1E6B52	AT3G06500	Drought	NON_TF
#1E6B52	AT3G53960	Drought	NON_TF
#A69363	AT1G07230	Salt	NON_TF
#1E6B52	AT3G04060	Drought	TF
#1E6B52	AT3G15220	Drought	NON_TF
#1E6B52	AT1G71450	Drought	TF
#1E6B52	AT5G47380	Drought	NON_TF
#FFD602	AT5G05790	Drought and Salt	TF
#1E6B52	AT5G05210	Drought	NON_TF
#A69363	AT5G48220	Salt	NON_TF
#A69363	AT4G19820	Salt	NON_TF
#A69363	AT1G53120	Salt	NON_TF
#A69363	AT2G28950	Salt	NON_TF
#A69363	AT1G19510	Salt	TF
#A69363	AT3G61210	Salt	NON_TF
#A69363	AT1G78240	Salt	NON_TF
#A69363	AT4G10120	Salt	NON_TF
#A69363	AT4G15545	Salt	NON_TF
#A69363	AT2G36000	Salt	TF
#A69363	AT4G20360	Salt	NON_TF
#A69363	AT3G57330	Salt	NON_TF
#A69363	AT1G32540	Salt	NON_TF
#A69363	AT1G48610	Salt	NON_TF
#A69363	AT5G16470	Salt	NON_TF
#A69363	AT3G16240	Salt	NON_TF
#A69363	AT4G25170	Salt	NON_TF
#A69363	AT2G40020	Salt	NON_TF
#A69363	AT1G55370	Salt	NON_TF
#A69363	AT3G10720	Salt	NON_TF
#A69363	AT2G41510	Salt	NON_TF
#1E6B52	AT2G23320	Drought	TF
#1E6B52	AT3G21175	Drought	TF
#1E6B52	AT1G68100	Drought	NON_TF
#1E6B52	AT5G49650	Drought	NON_TF
#1E6B52	AT5G07700	Drought	TF
#1E6B52	AT5G23010	Drought	NON_TF
#FFD602	AT2G46830	Drought and Salt	TF
#A69363	AT1G32900	Salt	NON_TF
#FFD602	AT3G28910	Drought and Salt	TF
#FFD602	AT4G24240	Drought and Salt	TF
#A69363	AT4G30610	Salt	NON_TF
#1E6B52	AT2G45680	Drought	TF
#1E6B52	AT4G20170	Drought	NON_TF
#1E6B52	AT4G16110	Drought	TF
#1E6B52	AT3G10030	Drought	TF
#FFD602	AT1G29160	Drought and Salt	TF
#1E6B52	AT1G07880	Drought	NON_TF
#A69363	AT1G08470	Salt	NON_TF
#A69363	AT3G30300	Salt	NON_TF
#1E6B52	AT4G38620	Drought	TF
#1E6B52	AT4G01660	Drought	NON_TF
#1E6B52	AT4G18880	Drought	TF
#1E6B52	AT1G26220	Drought	TF
#1E6B52	AT5G46760	Drought	TF
#1E6B52	AT5G17700	Drought	NON_TF
#1E6B52	AT2G37120	Drought	TF
#1E6B52	AT4G14070	Drought	NON_TF
#1E6B52	AT2G44940	Drought	TF
#1E6B52	AT4G30080	Drought	TF
#1E6B52	AT1G49970	Drought	NON_TF
#1E6B52	AT4G25470	Drought	TF
#FFD602	AT5G05090	Drought and Salt	TF
#1E6B52	AT5G63800	Drought	NON_TF
#A69363	AT1G73470	Salt	NON_TF
#A69363	AT2G28720	Salt	NON_TF
#1E6B52	AT5G67580	Drought	TF
#1E6B52	AT2G16750	Drought	NON_TF
#1E6B52	AT3G23210	Drought	TF
#FFD602	AT3G14180	Drought and Salt	TF
#FFD602	AT5G04170	Drought and Salt	NON_TF
#A69363	AT4G18240	Salt	NON_TF
#A69363	AT4G16750	Salt	TF
#A69363	AT1G13930	Salt	NON_TF
#A69363	AT5G11510	Salt	TF
#A69363	AT1G44110	Salt	NON_TF
#A69363	AT4G36730	Salt	TF
#A69363	AT4G28290	Salt	NON_TF
#A69363	AT1G68190	Salt	TF
#A69363	AT2G34620	Salt	TF
#A69363	AT4G36540	Salt	TF
#A69363	AT5G10030	Salt	TF
#A69363	AT5G05860	Salt	NON_TF
#A69363	AT5G13090	Salt	NON_TF
#A69363	AT3G52060	Salt	NON_TF
#A69363	AT2G37470	Salt	NON_TF
#A69363	AT1G11260	Salt	NON_TF
#A69363	AT3G59900	Salt	NON_TF
#A69363	AT1G49850	Salt	NON_TF
#A69363	AT1G69180	Salt	TF
#A69363	AT1G33900	Salt	NON_TF
#A69363	AT1G29390	Salt	NON_TF
#A69363	AT5G10860	Salt	NON_TF
#A69363	AT1G07420	Salt	NON_TF
#A69363	AT3G09540	Salt	NON_TF
#A69363	AT4G30660	Salt	NON_TF
#A69363	AT4G11660	Salt	TF
#A69363	AT2G04160	Salt	NON_TF
#A69363	AT4G23885	Salt	NON_TF
#A69363	AT4G36990	Salt	TF
#A69363	AT1G77120	Salt	NON_TF
#A69363	AT3G09440	Salt	NON_TF
#A69363	AT5G09590	Salt	NON_TF
#A69363	AT5G65470	Salt	NON_TF
#A69363	AT1G62740	Salt	NON_TF
#A69363	AT5G37670	Salt	NON_TF
#A69363	AT5G53400	Salt	NON_TF
#A69363	AT3G24500	Salt	TF
#A69363	AT1G48750	Salt	NON_TF
#A69363	AT1G57590	Salt	NON_TF
#A69363	AT5G43840	Salt	TF
#A69363	AT3G17790	Salt	NON_TF
#A69363	AT5G53120	Salt	NON_TF
#A69363	AT4G21980	Salt	NON_TF
#A69363	AT1G04360	Salt	NON_TF
#A69363	AT5G14960	Salt	TF
#A69363	AT3G18370	Salt	NON_TF
#A69363	AT1G51140	Salt	TF
#A69363	AT1G22160	Salt	NON_TF
#A69363	AT4G14010	Salt	NON_TF
#A69363	AT3G20250	Salt	NON_TF
#A69363	AT1G03290	Salt	NON_TF
#A69363	AT1G76180	Salt	NON_TF
#A69363	AT3G54340	Salt	TF
#A69363	AT5G20240	Salt	TF
#A69363	AT3G22830	Salt	TF
#A69363	AT2G45740	Salt	NON_TF
#A69363	AT2G32290	Salt	NON_TF
#A69363	AT5G51820	Salt	NON_TF
#A69363	AT1G68670	Salt	TF
#A69363	AT4G18340	Salt	NON_TF
#A69363	AT4G37610	Salt	TF
#A69363	AT3G48100	Salt	TF
#A69363	AT5G43700	Salt	TF
#A69363	AT1G75020	Salt	NON_TF
#A69363	AT2G40620	Salt	TF
#A69363	AT1G01250	Salt	TF
#A69363	AT1G47960	Salt	NON_TF
#A69363	AT1G12630	Salt	TF
#A69363	AT2G03710	Salt	TF
#A69363	AT1G09530	Salt	TF
#A69363	AT1G02205	Salt	NON_TF
#A69363	AT4G25480	Salt	TF
#A69363	AT1G53320	Salt	TF
#A69363	AT2G18300	Salt	TF
#A69363	AT4G37260	Salt	TF
#A69363	AT4G24370	Salt	NON_TF
#A69363	AT2G34770	Salt	NON_TF
#A69363	AT5G27600	Salt	NON_TF
#A69363	AT1G04120	Salt	NON_TF
#A69363	AT1G09850	Salt	NON_TF
#A69363	AT3G11020	Salt	TF
#A69363	AT4G32340	Salt	NON_TF
#A69363	AT1G49650	Salt	NON_TF
#A69363	AT1G21680	Salt	NON_TF
#A69363	AT3G04010	Salt	NON_TF
#A69363	AT5G61290	Salt	NON_TF
#A69363	AT5G39410	Salt	NON_TF
#A69363	AT1G47870	Salt	TF
#A69363	AT1G22300	Salt	NON_TF
#A69363	AT1G08810	Salt	TF
#A69363	AT3G13740	Salt	NON_TF
#A69363	AT1G32220	Salt	NON_TF
#A69363	AT5G49100	Salt	NON_TF
#A69363	AT1G63850	Salt	NON_TF
#A69363	AT1G75390	Salt	TF
#A69363	AT5G16910	Salt	NON_TF
#A69363	AT5G53870	Salt	NON_TF
#A69363	AT5G66400	Salt	NON_TF
#A69363	AT1G64110	Salt	NON_TF
#A69363	AT3G52540	Salt	TF
#A69363	AT5G05690	Salt	NON_TF
#A69363	AT5G05550	Salt	TF
#A69363	AT3G27280	Salt	NON_TF
#A69363	AT1G27940	Salt	NON_TF
#A69363	AT1G21460	Salt	NON_TF
#A69363	AT2G03500	Salt	TF
#A69363	AT4G32980	Salt	TF
#A69363	AT5G04820	Salt	TF
#A69363	AT1G03730	Salt	NON_TF
#A69363	AT4G18890	Salt	TF
#A69363	AT2G40610	Salt	NON_TF
#A69363	AT3G13510	Salt	NON_TF
#A69363	AT5G03150	Salt	TF
#A69363	AT5G13330	Salt	TF
#A69363	AT2G23610	Salt	NON_TF
#A69363	AT1G26210	Salt	NON_TF
#A69363	AT4G10350	Salt	TF
#A69363	AT3G08550	Salt	NON_TF
#A69363	AT5G62430	Salt	TF
#A69363	AT2G38150	Salt	NON_TF
#A69363	AT4G16150	Salt	TF
#A69363	AT1G75490	Salt	TF
#A69363	AT1G67050	Salt	NON_TF
#A69363	AT4G17810	Salt	TF
#A69363	AT3G16770	Salt	TF
#A69363	AT5G38520	Salt	NON_TF
#A69363	AT4G01550	Salt	TF
#A69363	AT5G59130	Salt	NON_TF
#A69363	AT2G23290	Salt	TF
#A69363	AT2G31230	Salt	TF
#A69363	AT2G22320	Salt	NON_TF
#A69363	AT2G34710	Salt	TF
#A69363	AT5G08330	Salt	TF
#A69363	AT3G11440	Salt	TF
#A69363	AT5G62220	Salt	NON_TF
#A69363	AT4G32800	Salt	TF
#A69363	AT4G01400	Salt	NON_TF
#A69363	AT2G33710	Salt	TF
#A69363	AT3G24570	Salt	NON_TF
#A69363	AT4G14410	Salt	TF
#A69363	AT1G32150	Salt	TF
#A69363	AT1G30520	Salt	NON_TF

## Sheet: Root Control Drought CERN
color	name	Net	TF
#1E6B52	AT4G10350	Control	TF
#1E6B52	AT3G49190	Control	NON_TF
#1E6B52	AT5G05500	Control	NON_TF
#1E6B52	AT3G56230	Control	TF
#1E6B52	AT3G18450	Control	NON_TF
#1E6B52	AT4G25820	Control	NON_TF
#1E6B52	AT2G37540	Control	NON_TF
#1E6B52	AT5G54370	Control	NON_TF
#1E6B52	AT5G35190	Control	NON_TF
#1E6B52	AT5G60530	Control	NON_TF
#1E6B52	AT1G52050	Control	NON_TF
#1E6B52	AT1G26820	Control	NON_TF
#1E6B52	AT3G10710	Control	NON_TF
#1E6B52	AT1G52060	Control	NON_TF
#1E6B52	AT4G02270	Control	NON_TF
#1E6B52	AT2G45750	Control	NON_TF
#FFD602	AT5G47220	Control and Drought	TF
#FFD602	AT1G28480	Control and Drought	NON_TF
#FFD602	AT4G20000	Control and Drought	NON_TF
#1E6B52	AT5G12340	Control	NON_TF
#FFD602	AT2G18210	Control and Drought	NON_TF
#FFD602	AT1G73500	Control and Drought	NON_TF
#FFD602	AT2G44840	Control and Drought	TF
#1E6B52	AT5G67080	Control	NON_TF
#1E6B52	AT4G17500	Control	TF
#FFD602	AT2G25460	Control and Drought	NON_TF
#A69363	AT1G19020	Drought	NON_TF
#A69363	AT1G23710	Drought	NON_TF
#FFD602	AT5G42380	Control and Drought	NON_TF
#A69363	AT3G62260	Drought	TF
#A69363	AT2G48010	Drought	NON_TF
#A69363	AT1G11050	Drought	NON_TF
#A69363	AT2G42760	Drought	NON_TF
#A69363	AT3G19580	Drought	TF
#A69363	AT1G24140	Drought	NON_TF
#FFD602	AT1G28370	Control and Drought	TF
#A69363	AT2G27260	Drought	NON_TF
#FFD602	AT4G34150	Control and Drought	NON_TF
#A69363	AT3G57450	Drought	NON_TF
#A69363	AT5G65300	Drought	NON_TF
#FFD602	AT1G27730	Control and Drought	TF
#FFD602	AT1G80840	Control and Drought	TF
#FFD602	AT3G44260	Control and Drought	NON_TF
#FFD602	AT5G22250	Control and Drought	NON_TF
#A69363	AT3G15210	Drought	TF
#A69363	AT5G43170	Drought	TF
#A69363	AT2G38470	Drought	TF
#A69363	AT3G16720	Drought	NON_TF
#A69363	AT2G45680	Drought	TF
#A69363	AT3G55980	Drought	TF
#A69363	AT3G49530	Drought	TF
#A69363	AT5G45340	Drought	NON_TF
#A69363	AT3G62720	Drought	NON_TF
#A69363	AT1G27100	Drought	NON_TF
#A69363	AT1G19770	Drought	NON_TF
#A69363	AT1G67880	Drought	NON_TF
#A69363	AT1G77640	Drought	TF
#FFD602	AT1G19210	Control and Drought	TF
#A69363	AT3G25250	Drought	NON_TF
#A69363	AT2G25735	Drought	NON_TF
#A69363	AT1G03970	Drought	TF
#A69363	AT1G21910	Drought	TF
#A69363	AT2G41010	Drought	NON_TF
#A69363	AT2G40140	Drought	TF
#A69363	AT2G39650	Drought	NON_TF
#A69363	AT5G47960	Drought	NON_TF
#A69363	AT3G56880	Drought	NON_TF
#A69363	AT5G67250	Drought	NON_TF
#A69363	AT2G33580	Drought	NON_TF
#A69363	AT1G09070	Drought	NON_TF
#FFD602	AT1G17380	Control and Drought	TF
#A69363	AT3G09830	Drought	NON_TF
#A69363	AT3G01830	Drought	NON_TF
#A69363	AT1G05575	Drought	NON_TF
#A69363	AT2G18690	Drought	NON_TF
#A69363	AT4G17230	Drought	TF
#A69363	AT4G34390	Drought	NON_TF
#A69363	AT1G59910	Drought	NON_TF
#FFD602	AT1G19180	Control and Drought	TF
#A69363	AT3G11820	Drought	NON_TF
#A69363	AT1G29340	Drought	NON_TF
#1E6B52	AT5G25810	Control	TF
#1E6B52	AT2G22125	Control	NON_TF
#1E6B52	AT1G65960	Control	NON_TF
#FFD602	AT1G72360	Control and Drought	TF
#FFD602	AT4G24110	Control and Drought	NON_TF
#1E6B52	AT5G62520	Control	NON_TF
#1E6B52	AT4G10270	Control	NON_TF
#1E6B52	AT3G02550	Control	TF
#1E6B52	AT1G74940	Control	NON_TF
#1E6B52	AT3G23170	Control	NON_TF
#1E6B52	AT4G37240	Control	NON_TF
#FFD602	AT5G22570	Control and Drought	TF
#1E6B52	AT5G13220	Control	TF
#A69363	AT1G28380	Drought	NON_TF
#A69363	AT4G35985	Drought	NON_TF
#A69363	AT2G02310	Drought	NON_TF
#A69363	AT1G72450	Drought	TF
#A69363	AT2G44500	Drought	NON_TF
#A69363	AT3G16860	Drought	NON_TF
#A69363	AT5G13700	Drought	NON_TF
#FFD602	AT1G20510	Control and Drought	NON_TF
#1E6B52	AT2G43000	Control	TF
#1E6B52	AT1G26380	Control	NON_TF
#1E6B52	AT2G30750	Control	NON_TF
#1E6B52	AT1G74080	Control	TF
#1E6B52	AT3G09600	Control	TF
#FFD602	AT1G01060	Control and Drought	TF
#FFD602	AT5G67300	Control and Drought	TF
#1E6B52	AT2G35710	Control	NON_TF
#A69363	AT1G73805	Drought	NON_TF
#A69363	AT2G35290	Drought	NON_TF
#A69363	AT4G18010	Drought	NON_TF
#A69363	AT1G61890	Drought	NON_TF
#A69363	AT1G02660	Drought	NON_TF
#A69363	AT3G26980	Drought	NON_TF
#A69363	AT2G17480	Drought	NON_TF
#A69363	AT3G50260	Drought	TF
#A69363	AT2G22850	Drought	TF
#A69363	AT1G22510	Drought	NON_TF
#A69363	AT4G26690	Drought	NON_TF
#A69363	AT3G54200	Drought	NON_TF
#A69363	AT4G17615	Drought	NON_TF
#A69363	AT4G13340	Drought	NON_TF
#A69363	AT1G11960	Drought	NON_TF
#A69363	AT3G55430	Drought	NON_TF
#A69363	AT1G74950	Drought	TF
#1E6B52	AT3G04070	Control	TF
#FFD602	AT5G39050	Control and Drought	NON_TF
#FFD602	AT4G17490	Control and Drought	TF
#FFD602	AT3G25600	Control and Drought	NON_TF
#FFD602	AT5G06320	Control and Drought	NON_TF
#A69363	AT2G05940	Drought	NON_TF
#FFD602	AT4G29780	Control and Drought	NON_TF
#A69363	AT2G22500	Drought	NON_TF
#A69363	AT2G35930	Drought	NON_TF
#FFD602	AT5G17350	Control and Drought	NON_TF
#A69363	AT1G74450	Drought	NON_TF
#A69363	AT2G41640	Drought	NON_TF
#A69363	AT4G18880	Drought	TF
#A69363	AT4G11280	Drought	NON_TF
#A69363	AT5G66070	Drought	NON_TF
#A69363	AT3G52400	Drought	NON_TF
#A69363	AT2G30040	Drought	NON_TF
#A69363	AT3G52800	Drought	NON_TF
#A69363	AT2G01180	Drought	NON_TF
#A69363	AT1G66160	Drought	NON_TF
#A69363	AT5G64310	Drought	NON_TF
#A69363	AT2G46400	Drought	TF
#FFD602	AT3G23250	Control and Drought	TF
#A69363	AT5G52750	Drought	NON_TF
#A69363	AT3G59080	Drought	NON_TF
#A69363	AT3G50930	Drought	NON_TF
#A69363	AT5G10380	Drought	NON_TF
#FFD602	AT5G47230	Control and Drought	TF
#1E6B52	AT3G46620	Control	NON_TF
#A69363	AT5G39785	Drought	NON_TF
#FFD602	AT2G46830	Control and Drought	TF
#A69363	AT5G24590	Drought	TF
#A69363	AT3G06890	Drought	NON_TF
#A69363	AT5G47910	Drought	NON_TF
#A69363	AT5G11650	Drought	NON_TF
#A69363	AT2G43320	Drought	NON_TF
#A69363	AT1G20310	Drought	NON_TF
#A69363	AT3G14440	Drought	NON_TF
#A69363	AT1G29690	Drought	NON_TF
#A69363	AT5G64890	Drought	NON_TF
#A69363	AT2G27080	Drought	NON_TF
#1E6B52	AT3G47500	Control	TF
#1E6B52	AT3G16800	Control	NON_TF
#1E6B52	AT1G06040	Control	TF
#FFD602	AT5G51190	Control and Drought	TF
#A69363	AT3G28340	Drought	NON_TF
#A69363	AT1G22190	Drought	TF
#A69363	AT3G56710	Drought	NON_TF
#A69363	AT4G24570	Drought	NON_TF
#FFD602	AT4G34410	Control and Drought	TF
#A69363	AT3G08720	Drought	NON_TF
#A69363	AT4G31800	Drought	TF
#A69363	AT1G72520	Drought	NON_TF
#A69363	AT2G29510	Drought	NON_TF
#A69363	AT1G68690	Drought	NON_TF
#A69363	AT5G66210	Drought	NON_TF
#A69363	AT1G78280	Drought	TF
#1E6B52	AT5G28770	Control	TF
#1E6B52	AT1G28330	Control	NON_TF
#1E6B52	AT5G58900	Control	TF
#1E6B52	AT5G24070	Control	NON_TF
#A69363	AT1G25400	Drought	NON_TF
#A69363	AT1G63750	Drought	NON_TF
#A69363	AT4G01090	Drought	NON_TF
#A69363	AT1G13340	Drought	NON_TF
#A69363	AT3G57530	Drought	NON_TF
#A69363	AT5G11070	Drought	NON_TF
#A69363	AT3G06750	Drought	NON_TF
#A69363	AT5G10750	Drought	NON_TF
#A69363	AT3G07360	Drought	NON_TF
#FFD602	AT5G61600	Control and Drought	TF
#A69363	AT1G73540	Drought	NON_TF
#A69363	AT1G72950	Drought	NON_TF
#FFD602	AT1G32640	Control and Drought	TF
#FFD602	AT3G10930	Control and Drought	NON_TF
#A69363	AT1G61340	Drought	NON_TF
#A69363	AT5G37770	Drought	NON_TF
#A69363	AT5G59550	Drought	NON_TF
#A69363	AT3G50060	Drought	TF
#A69363	AT1G74930	Drought	TF
#A69363	AT4G39570	Drought	NON_TF
#A69363	AT4G27652	Drought	NON_TF
#A69363	AT4G39670	Drought	NON_TF
#A69363	AT4G25390	Drought	NON_TF
#A69363	AT2G40000	Drought	NON_TF
#A69363	AT1G07000	Drought	NON_TF
#A69363	AT1G32920	Drought	NON_TF
#A69363	AT4G23810	Drought	TF
#A69363	AT3G02840	Drought	NON_TF
#A69363	AT4G33920	Drought	NON_TF
#A69363	AT4G02200	Drought	NON_TF
#A69363	AT3G27540	Drought	NON_TF
#A69363	AT2G23810	Drought	NON_TF
#A69363	AT3G47080	Drought	NON_TF
#A69363	AT3G55050	Drought	NON_TF
#A69363	AT1G49840	Drought	NON_TF
#A69363	AT4G30440	Drought	NON_TF
#A69363	AT3G15530	Drought	NON_TF
#A69363	AT3G15810	Drought	NON_TF
#A69363	AT2G25250	Drought	NON_TF
#A69363	AT1G18740	Drought	NON_TF
#A69363	AT5G54380	Drought	NON_TF
#A69363	AT1G02810	Drought	NON_TF
#A69363	AT5G26920	Drought	NON_TF
#A69363	AT4G32800	Drought	TF
#A69363	AT2G17840	Drought	NON_TF
#A69363	AT1G44350	Drought	NON_TF
#A69363	AT5G16910	Drought	NON_TF
#A69363	AT3G09940	Drought	NON_TF
#A69363	AT3G47960	Drought	NON_TF
#A69363	AT1G08920	Drought	NON_TF
#A69363	AT2G46270	Drought	TF
#A69363	AT1G20450	Drought	NON_TF
#A69363	AT5G52510	Drought	TF
#A69363	AT5G45110	Drought	TF
#A69363	AT1G60190	Drought	NON_TF
#A69363	AT3G45970	Drought	NON_TF
#A69363	AT2G30360	Drought	NON_TF
#A69363	AT1G22810	Drought	TF
#A69363	AT4G37400	Drought	NON_TF
#A69363	AT5G20230	Drought	NON_TF
#A69363	AT2G32190	Drought	NON_TF
#A69363	AT5G57190	Drought	NON_TF
#A69363	AT1G02400	Drought	NON_TF
#A69363	AT3G55840	Drought	NON_TF
#A69363	AT1G80820	Drought	NON_TF
#A69363	AT2G26380	Drought	NON_TF
#A69363	AT1G24150	Drought	NON_TF
#A69363	AT2G24850	Drought	NON_TF
#A69363	AT5G52050	Drought	NON_TF
#A69363	AT4G35180	Drought	NON_TF
#A69363	AT3G54810	Drought	TF
#A69363	AT2G26150	Drought	TF
#A69363	AT1G74310	Drought	NON_TF
#A69363	AT2G25200	Drought	NON_TF
#A69363	AT5G62570	Drought	NON_TF
#A69363	AT3G07350	Drought	NON_TF
#A69363	AT4G37260	Drought	TF
#A69363	AT3G04640	Drought	NON_TF
#A69363	AT3G23400	Drought	NON_TF
#A69363	AT3G54000	Drought	NON_TF
#A69363	AT2G40270	Drought	NON_TF
#A69363	AT3G55720	Drought	NON_TF
#A69363	AT5G64905	Drought	NON_TF
#A69363	AT3G18690	Drought	NON_TF
#A69363	AT5G47070	Drought	NON_TF
#A69363	AT2G23290	Drought	TF
#A69363	AT4G25480	Drought	TF
#A69363	AT4G36900	Drought	TF
#A69363	AT3G48520	Drought	NON_TF
#A69363	AT5G16830	Drought	NON_TF
#A69363	AT1G25560	Drought	TF
#A69363	AT4G36500	Drought	NON_TF
#A69363	AT2G30930	Drought	NON_TF
#A69363	AT4G36010	Drought	NON_TF
#A69363	AT2G34930	Drought	NON_TF
#A69363	AT3G01970	Drought	TF
#A69363	AT1G55850	Drought	NON_TF
#A69363	AT3G58710	Drought	TF
#A69363	AT4G37790	Drought	TF
#A69363	AT3G11420	Drought	NON_TF
#A69363	AT2G30250	Drought	TF
#A69363	AT5G25440	Drought	NON_TF
#A69363	AT1G76970	Drought	NON_TF
#A69363	AT1G71697	Drought	NON_TF
#A69363	AT1G62300	Drought	TF
#A69363	AT5G02230	Drought	NON_TF
#A69363	AT5G52020	Drought	TF
#A69363	AT1G44830	Drought	TF
#A69363	AT2G45420	Drought	TF
#A69363	AT1G51170	Drought	NON_TF
#A69363	AT1G79180	Drought	TF
#A69363	AT2G34140	Drought	TF
#A69363	AT4G34230	Drought	NON_TF
#A69363	AT5G58430	Drought	NON_TF
#A69363	AT4G10390	Drought	NON_TF
#A69363	AT1G50640	Drought	TF
#A69363	AT3G61580	Drought	NON_TF
#A69363	AT2G37590	Drought	TF
#A69363	AT4G03320	Drought	NON_TF
#A69363	AT1G53170	Drought	TF
#A69363	AT1G50740	Drought	NON_TF
#A69363	AT2G17450	Drought	NON_TF
#A69363	AT1G43160	Drought	TF
#A69363	AT4G35480	Drought	NON_TF
#A69363	AT3G50910	Drought	NON_TF
#A69363	AT2G20900	Drought	NON_TF
#A69363	AT2G32030	Drought	TF
#A69363	AT5G22690	Drought	NON_TF
#A69363	AT1G67060	Drought	NON_TF
#A69363	AT2G01060	Drought	TF
#A69363	AT3G55070	Drought	NON_TF
#A69363	AT2G22300	Drought	TF
#A69363	AT1G28200	Drought	NON_TF
#A69363	AT5G05600	Drought	NON_TF
#A69363	AT5G39610	Drought	TF
#A69363	AT1G55920	Drought	NON_TF
#A69363	AT2G30140	Drought	NON_TF
#A69363	AT1G69490	Drought	TF
#A69363	AT5G14180	Drought	NON_TF
#A69363	AT1G19000	Drought	TF
#A69363	AT1G74840	Drought	TF
#A69363	AT4G25470	Drought	TF
#A69363	AT4G25490	Drought	TF
#A69363	AT3G47340	Drought	NON_TF
#A69363	AT4G28140	Drought	TF
#A69363	AT1G20070	Drought	NON_TF
#A69363	AT1G21000	Drought	TF
#A69363	AT4G14270	Drought	NON_TF
#A69363	AT2G46510	Drought	TF
#A69363	AT1G19850	Drought	TF
#A69363	AT2G26690	Drought	NON_TF
#A69363	AT1G36060	Drought	TF
#A69363	AT2G21960	Drought	NON_TF
#A69363	AT3G06490	Drought	TF
#A69363	AT2G38240	Drought	NON_TF
#A69363	AT1G51700	Drought	TF
#A69363	AT2G46600	Drought	NON_TF
#A69363	AT2G36010	Drought	TF
#A69363	AT4G38100	Drought	NON_TF
#A69363	AT1G30510	Drought	NON_TF
#A69363	AT4G37750	Drought	TF
#A69363	AT4G34160	Drought	NON_TF
#A69363	AT2G42430	Drought	TF
#A69363	AT1G12610	Drought	TF
#A69363	AT2G27690	Drought	NON_TF
#A69363	AT5G11260	Drought	TF
#A69363	AT2G16400	Drought	TF

## Sheet: Root Control Salt CERN
color	name	Net	TF
#FFD602	AT4G10350	Control and Salt	TF
#FFD602	AT1G52050	Control and Salt	NON_TF
#FFD602	AT5G54370	Control and Salt	NON_TF
#1E6B52	AT5G60530	Control	NON_TF
#1E6B52	AT3G18450	Control	NON_TF
#FFD602	AT2G37540	Control and Salt	NON_TF
#1E6B52	AT4G25820	Control	NON_TF
#1E6B52	AT3G49190	Control	NON_TF
#FFD602	AT5G35190	Control and Salt	NON_TF
#1E6B52	AT1G52060	Control	NON_TF
#FFD602	AT4G02270	Control and Salt	NON_TF
#FFD602	AT2G45750	Control and Salt	NON_TF
#1E6B52	AT5G05500	Control	NON_TF
#1E6B52	AT3G56230	Control	TF
#FFD602	AT3G10710	Control and Salt	NON_TF
#1E6B52	AT1G26820	Control	NON_TF
#A69363	AT1G02230	Salt	TF
#A69363	AT3G49700	Salt	NON_TF
#A69363	AT2G38840	Salt	NON_TF
#A69363	AT5G14740	Salt	NON_TF
#A69363	AT5G51470	Salt	NON_TF
#A69363	AT5G62600	Salt	NON_TF
#A69363	AT4G24170	Salt	NON_TF
#A69363	AT5G38850	Salt	NON_TF
#A69363	AT1G01790	Salt	NON_TF
#FFD602	AT5G25810	Control and Salt	TF
#1E6B52	AT1G65960	Control	NON_TF
#FFD602	AT2G22125	Control and Salt	NON_TF
#A69363	AT5G66560	Salt	NON_TF
#A69363	AT3G16240	Salt	NON_TF
#A69363	AT1G62330	Salt	NON_TF
#A69363	AT2G36130	Salt	NON_TF
#A69363	AT4G29720	Salt	NON_TF
#A69363	AT3G09210	Salt	NON_TF
#A69363	AT1G11750	Salt	NON_TF
#A69363	AT4G36290	Salt	NON_TF
#A69363	AT1G30840	Salt	NON_TF
#A69363	AT5G35620	Salt	NON_TF
#A69363	AT1G02150	Salt	NON_TF
#A69363	AT3G01690	Salt	NON_TF
#A69363	AT3G22630	Salt	NON_TF
#A69363	AT3G01120	Salt	NON_TF
#A69363	AT2G22170	Salt	NON_TF
#A69363	AT4G04340	Salt	NON_TF
#A69363	AT1G09750	Salt	NON_TF
#A69363	AT5G55610	Salt	NON_TF
#A69363	AT1G16920	Salt	NON_TF
#A69363	AT1G19960	Salt	NON_TF
#A69363	AT3G08740	Salt	NON_TF
#A69363	AT2G30050	Salt	NON_TF
#A69363	AT5G15050	Salt	NON_TF
#A69363	AT2G42040	Salt	TF
#A69363	AT5G60640	Salt	NON_TF
#A69363	AT3G04890	Salt	NON_TF
#A69363	AT5G15200	Salt	NON_TF
#A69363	AT2G35470	Salt	NON_TF
#A69363	AT5G16390	Salt	NON_TF
#A69363	AT3G54400	Salt	NON_TF
#A69363	AT5G64670	Salt	NON_TF
#FFD602	AT3G47500	Control and Salt	TF
#1E6B52	AT3G16800	Control	NON_TF
#FFD602	AT1G06040	Control and Salt	TF
#A69363	AT3G21220	Salt	NON_TF
#A69363	AT5G57660	Salt	TF
#A69363	AT3G57340	Salt	NON_TF
#A69363	AT1G10470	Salt	TF
#A69363	AT4G15240	Salt	NON_TF
#FFD602	AT2G43000	Control and Salt	TF
#1E6B52	AT1G74080	Control	TF
#FFD602	AT1G26380	Control and Salt	NON_TF
#1E6B52	AT2G30750	Control	NON_TF
#A69363	AT2G44010	Salt	NON_TF
#A69363	AT1G74360	Salt	NON_TF
#A69363	AT1G70530	Salt	NON_TF
#A69363	AT3G59700	Salt	NON_TF
#A69363	AT3G55150	Salt	NON_TF
#A69363	AT3G09010	Salt	NON_TF
#A69363	AT1G80450	Salt	NON_TF
#A69363	AT5G48540	Salt	NON_TF
#A69363	AT2G23450	Salt	NON_TF
#A69363	AT3G18290	Salt	NON_TF
#FFD602	AT5G51190	Control and Salt	TF
#FFD602	AT4G29780	Control and Salt	NON_TF
#A69363	AT4G17460	Salt	TF
#A69363	AT3G09940	Salt	NON_TF
#A69363	AT1G73730	Salt	TF
#A69363	AT1G73590	Salt	NON_TF
#A69363	AT3G56980	Salt	TF
#A69363	AT1G27100	Salt	NON_TF
#A69363	AT4G23050	Salt	NON_TF
#A69363	AT1G13210	Salt	NON_TF
#FFD602	AT4G20000	Control and Salt	NON_TF
#A69363	AT2G26390	Salt	NON_TF
#A69363	AT4G20170	Salt	NON_TF
#A69363	AT5G06860	Salt	NON_TF
#A69363	AT5G60800	Salt	NON_TF
#A69363	AT2G46400	Salt	TF
#A69363	AT1G26730	Salt	NON_TF
#A69363	AT5G12930	Salt	NON_TF
#FFD602	AT3G10930	Control and Salt	NON_TF
#A69363	AT3G02840	Salt	NON_TF
#A69363	AT4G26120	Salt	TF
#A69363	AT5G09800	Salt	NON_TF
#A69363	AT4G35180	Salt	NON_TF
#A69363	AT1G75020	Salt	NON_TF
#A69363	AT3G54030	Salt	NON_TF
#A69363	AT1G20310	Salt	NON_TF
#A69363	AT4G15120	Salt	NON_TF
#A69363	AT1G49780	Salt	NON_TF
#A69363	AT1G04330	Salt	NON_TF
#A69363	AT3G14090	Salt	NON_TF
#FFD602	AT1G19210	Control and Salt	TF
#A69363	AT3G52800	Salt	NON_TF
#A69363	AT1G05200	Salt	NON_TF
#A69363	AT5G47910	Salt	NON_TF
#A69363	AT1G68840	Salt	TF
#A69363	AT5G52050	Salt	NON_TF
#A69363	AT2G41800	Salt	NON_TF
#FFD602	AT2G44840	Control and Salt	TF
#A69363	AT1G17420	Salt	NON_TF
#A69363	AT3G52450	Salt	NON_TF
#A69363	AT2G19650	Salt	NON_TF
#A69363	AT1G15520	Salt	NON_TF
#A69363	AT2G28400	Salt	NON_TF
#A69363	AT1G08490	Salt	NON_TF
#A69363	AT2G35930	Salt	NON_TF
#A69363	AT1G32690	Salt	NON_TF
#A69363	AT3G25900	Salt	NON_TF
#FFD602	AT4G17500	Control and Salt	TF
#A69363	AT3G44190	Salt	NON_TF
#A69363	AT4G25390	Salt	NON_TF
#A69363	AT3G10800	Salt	TF
#A69363	AT1G05300	Salt	NON_TF
#A69363	AT2G02310	Salt	NON_TF
#A69363	AT5G62680	Salt	NON_TF
#A69363	AT1G76700	Salt	NON_TF
#A69363	AT2G33580	Salt	NON_TF
#A69363	AT1G02750	Salt	NON_TF
#A69363	AT1G10585	Salt	TF
#A69363	AT4G36030	Salt	NON_TF
#A69363	AT5G64660	Salt	NON_TF
#A69363	AT5G66210	Salt	NON_TF
#A69363	AT3G06490	Salt	TF
#A69363	AT1G19020	Salt	NON_TF
#A69363	AT1G30135	Salt	TF
#A69363	AT4G04840	Salt	NON_TF
#A69363	AT1G15170	Salt	NON_TF
#A69363	AT1G10700	Salt	NON_TF
#FFD602	AT4G37240	Control and Salt	NON_TF
#FFD602	AT3G46620	Control and Salt	NON_TF
#A69363	AT3G55470	Salt	NON_TF
#A69363	AT3G59350	Salt	NON_TF
#A69363	AT1G15110	Salt	NON_TF
#A69363	AT2G15490	Salt	NON_TF
#FFD602	AT1G73500	Control and Salt	NON_TF
#A69363	AT1G51700	Salt	TF
#A69363	AT2G36220	Salt	NON_TF
#FFD602	AT5G22570	Control and Salt	TF
#A69363	AT4G39890	Salt	NON_TF
#A69363	AT5G03390	Salt	NON_TF
#A69363	AT1G76070	Salt	NON_TF
#A69363	AT3G19580	Salt	TF
#A69363	AT1G67470	Salt	NON_TF
#A69363	AT5G13190	Salt	NON_TF
#A69363	AT1G77760	Salt	NON_TF
#A69363	AT1G29340	Salt	NON_TF
#A69363	AT2G22500	Salt	NON_TF
#A69363	AT1G05575	Salt	NON_TF
#A69363	AT5G14700	Salt	NON_TF
#A69363	AT3G01830	Salt	NON_TF
#A69363	AT1G55450	Salt	NON_TF
#A69363	AT5G47850	Salt	NON_TF
#A69363	AT4G23810	Salt	TF
#A69363	AT1G02400	Salt	NON_TF
#A69363	AT4G17230	Salt	TF
#A69363	AT5G25930	Salt	NON_TF
#A69363	AT2G06050	Salt	NON_TF
#A69363	AT4G18880	Salt	TF
#A69363	AT3G18690	Salt	NON_TF
#A69363	AT4G02330	Salt	NON_TF
#A69363	AT4G36650	Salt	NON_TF
#A69363	AT3G16720	Salt	NON_TF
#A69363	AT2G45760	Salt	NON_TF
#FFD602	AT2G18210	Control and Salt	NON_TF
#A69363	AT5G16970	Salt	NON_TF
#A69363	AT5G27520	Salt	NON_TF
#A69363	AT1G07790	Salt	NON_TF
#A69363	AT3G05220	Salt	NON_TF
#A69363	AT3G11820	Salt	NON_TF
#FFD602	AT5G47220	Control and Salt	TF
#A69363	AT4G35110	Salt	NON_TF
#A69363	AT3G09830	Salt	NON_TF
#A69363	AT2G18090	Salt	TF
#FFD602	AT1G20510	Control and Salt	NON_TF
#A69363	AT3G57700	Salt	NON_TF
#A69363	AT4G24570	Salt	NON_TF
#A69363	AT1G70740	Salt	NON_TF
#A69363	AT1G23360	Salt	NON_TF
#A69363	AT5G10190	Salt	NON_TF
#A69363	AT5G19380	Salt	NON_TF
#A69363	AT3G11840	Salt	NON_TF
#A69363	AT4G01010	Salt	NON_TF
#FFD602	AT5G17350	Control and Salt	NON_TF
#A69363	AT3G47600	Salt	TF
#A69363	AT5G27670	Salt	NON_TF
#A69363	AT1G03730	Salt	NON_TF
#A69363	AT1G02720	Salt	NON_TF
#A69363	AT1G13260	Salt	TF
#A69363	AT5G43890	Salt	NON_TF
#A69363	AT5G62280	Salt	NON_TF
#A69363	AT3G28340	Salt	NON_TF
#A69363	AT4G11870	Salt	NON_TF
#A69363	AT3G60260	Salt	NON_TF
#A69363	AT5G47640	Salt	TF
#FFD602	AT1G17380	Control and Salt	TF
#FFD602	AT3G25600	Control and Salt	NON_TF
#A69363	AT4G32140	Salt	NON_TF
#FFD602	AT4G17490	Control and Salt	TF
#FFD602	AT5G06320	Control and Salt	NON_TF
#FFD602	AT4G34150	Control and Salt	NON_TF
#A69363	AT5G05850	Salt	NON_TF
#A69363	AT1G61660	Salt	TF
#A69363	AT3G62720	Salt	NON_TF
#A69363	AT1G65860	Salt	NON_TF
#A69363	AT5G11650	Salt	NON_TF
#A69363	AT1G18570	Salt	TF
#A69363	AT2G46500	Salt	NON_TF
#A69363	AT2G47130	Salt	NON_TF
#A69363	AT1G11050	Salt	NON_TF
#A69363	AT3G26910	Salt	NON_TF
#A69363	AT4G33520	Salt	NON_TF
#A69363	AT1G57650	Salt	NON_TF
#A69363	AT4G18890	Salt	TF
#A69363	AT1G43560	Salt	NON_TF
#A69363	AT3G52360	Salt	NON_TF
#A69363	AT5G57500	Salt	NON_TF
#A69363	AT1G29690	Salt	NON_TF
#A69363	AT4G11280	Salt	NON_TF
#A69363	AT2G35000	Salt	NON_TF
#A69363	AT5G46780	Salt	NON_TF
#A69363	AT5G42940	Salt	NON_TF
#A69363	AT3G07370	Salt	NON_TF
#A69363	AT1G04770	Salt	NON_TF
#A69363	AT3G24090	Salt	NON_TF
#A69363	AT3G44720	Salt	NON_TF
#A69363	AT5G03690	Salt	NON_TF
#A69363	AT4G33440	Salt	NON_TF
#A69363	AT1G11200	Salt	NON_TF
#A69363	AT2G24600	Salt	NON_TF
#A69363	AT1G14370	Salt	NON_TF
#A69363	AT4G22070	Salt	TF
#A69363	AT4G38550	Salt	NON_TF
#A69363	AT4G23220	Salt	NON_TF
#A69363	AT5G39020	Salt	NON_TF
#A69363	AT4G01550	Salt	TF
#A69363	AT5G16960	Salt	NON_TF
#A69363	AT1G44350	Salt	NON_TF
#A69363	AT3G01500	Salt	NON_TF
#A69363	AT3G18560	Salt	NON_TF
#A69363	AT5G45340	Salt	NON_TF
#A69363	AT4G39640	Salt	NON_TF
#A69363	AT5G48530	Salt	NON_TF
#A69363	AT4G23190	Salt	NON_TF
#A69363	AT2G41640	Salt	NON_TF
#A69363	AT4G35600	Salt	NON_TF
#A69363	AT5G01540	Salt	NON_TF
#A69363	AT5G27420	Salt	NON_TF
#A69363	AT5G47880	Salt	NON_TF
#A69363	AT1G77380	Salt	NON_TF
#A69363	AT1G18390	Salt	NON_TF
#A69363	AT3G25780	Salt	NON_TF
#A69363	AT3G20340	Salt	NON_TF
#A69363	AT2G39660	Salt	NON_TF
#A69363	AT4G02380	Salt	NON_TF
#A69363	AT1G74450	Salt	NON_TF
#A69363	AT2G17480	Salt	NON_TF
#A69363	AT2G41420	Salt	NON_TF
#A69363	AT3G25250	Salt	NON_TF
#A69363	AT5G35580	Salt	NON_TF
#FFD602	AT5G12340	Control and Salt	NON_TF
#A69363	AT4G19460	Salt	NON_TF
#A69363	AT3G08720	Salt	NON_TF
#FFD602	AT2G25460	Control and Salt	NON_TF
#A69363	AT2G24850	Salt	NON_TF
#A69363	AT1G02360	Salt	NON_TF
#A69363	AT1G66880	Salt	NON_TF
#FFD602	AT1G27730	Control and Salt	TF
#A69363	AT2G16900	Salt	NON_TF
#A69363	AT4G08500	Salt	NON_TF
#A69363	AT2G30040	Salt	NON_TF
#A69363	AT4G18950	Salt	NON_TF
#A69363	AT4G31550	Salt	TF
#A69363	AT2G40000	Salt	NON_TF
#A69363	AT2G47000	Salt	NON_TF
#A69363	AT2G21780	Salt	NON_TF
#A69363	AT3G12570	Salt	NON_TF
#FFD602	AT1G28480	Control and Salt	NON_TF
#A69363	AT5G14730	Salt	NON_TF
#A69363	AT3G25610	Salt	NON_TF
#A69363	AT4G25350	Salt	NON_TF
#A69363	AT1G33030	Salt	NON_TF
#A69363	AT3G54100	Salt	NON_TF
#A69363	AT4G33430	Salt	NON_TF
#A69363	AT5G35735	Salt	NON_TF
#A69363	AT1G62300	Salt	TF
#A69363	AT2G39650	Salt	NON_TF
#A69363	AT2G38240	Salt	NON_TF
#A69363	AT3G01820	Salt	NON_TF
#A69363	AT2G43320	Salt	NON_TF
#A69363	AT2G40140	Salt	TF
#A69363	AT2G32190	Salt	NON_TF
#A69363	AT5G03380	Salt	NON_TF
#A69363	AT1G72520	Salt	NON_TF
#A69363	AT1G76970	Salt	NON_TF
#A69363	AT5G03700	Salt	NON_TF
#A69363	AT1G59870	Salt	NON_TF
#A69363	AT3G09480	Salt	NON_TF
#A69363	AT5G47070	Salt	NON_TF
#A69363	AT3G47550	Salt	NON_TF
#A69363	AT5G51630	Salt	NON_TF
#A69363	AT5G41100	Salt	NON_TF
#A69363	AT1G04790	Salt	NON_TF
#A69363	AT4G33470	Salt	NON_TF
#A69363	AT5G24590	Salt	TF
#A69363	AT3G14225	Salt	NON_TF
#A69363	AT3G55430	Salt	NON_TF
#A69363	AT5G01950	Salt	NON_TF
#A69363	AT3G63060	Salt	NON_TF
#A69363	AT4G32800	Salt	TF
#A69363	AT2G45400	Salt	NON_TF
#A69363	AT5G26920	Salt	NON_TF
#A69363	AT5G63130	Salt	NON_TF
#A69363	AT3G01480	Salt	NON_TF
#A69363	AT2G23320	Salt	TF
#A69363	AT1G06620	Salt	NON_TF
#FFD602	AT5G42380	Control and Salt	NON_TF
#A69363	AT3G57280	Salt	NON_TF
#A69363	AT1G68630	Salt	NON_TF
#A69363	AT3G01310	Salt	NON_TF
#A69363	AT2G47140	Salt	NON_TF
#A69363	AT3G02800	Salt	NON_TF
#A69363	AT4G01090	Salt	NON_TF
#A69363	AT1G17860	Salt	NON_TF
#A69363	AT3G06483	Salt	NON_TF
#A69363	AT1G33590	Salt	NON_TF
#A69363	AT3G47730	Salt	NON_TF
#A69363	AT2G23290	Salt	TF
#A69363	AT1G01720	Salt	TF
#A69363	AT4G15440	Salt	NON_TF
#A69363	AT1G68450	Salt	NON_TF
#A69363	AT5G01560	Salt	NON_TF
#A69363	AT4G40020	Salt	NON_TF
#A69363	AT5G07730	Salt	NON_TF
#A69363	AT1G29860	Salt	TF
#A69363	AT2G35910	Salt	NON_TF
#A69363	AT5G03210	Salt	NON_TF
#A69363	AT1G59910	Salt	NON_TF
#A69363	AT5G55090	Salt	NON_TF
#A69363	AT3G53650	Salt	NON_TF
#A69363	AT5G61560	Salt	NON_TF
#A69363	AT5G66070	Salt	NON_TF
#A69363	AT3G22160	Salt	NON_TF
#A69363	AT1G28380	Salt	NON_TF
#A69363	AT3G15500	Salt	TF
#A69363	AT5G47390	Salt	TF
#A69363	AT4G01870	Salt	NON_TF
#A69363	AT2G44790	Salt	NON_TF
#A69363	AT1G68690	Salt	NON_TF
#A69363	AT1G03740	Salt	NON_TF
#A69363	AT4G30280	Salt	NON_TF
#A69363	AT4G25030	Salt	NON_TF
#A69363	AT1G30370	Salt	NON_TF
#A69363	AT1G61820	Salt	NON_TF
#A69363	AT1G66340	Salt	TF
#A69363	AT5G38310	Salt	NON_TF
#A69363	AT1G07000	Salt	NON_TF
#A69363	AT1G80110	Salt	NON_TF
#A69363	AT2G38290	Salt	NON_TF
#A69363	AT4G01950	Salt	NON_TF
#A69363	AT4G05020	Salt	NON_TF
#A69363	AT1G77890	Salt	NON_TF
#A69363	AT3G46280	Salt	NON_TF
#A69363	AT5G13760	Salt	NON_TF
#A69363	AT5G19110	Salt	NON_TF
#A69363	AT3G50790	Salt	NON_TF
#FFD602	AT4G34410	Control and Salt	TF
#FFD602	AT1G19180	Control and Salt	TF
#A69363	AT2G15480	Salt	NON_TF
#A69363	AT2G01450	Salt	NON_TF
#A69363	AT2G26380	Salt	NON_TF
#A69363	AT2G39400	Salt	NON_TF
#FFD602	AT5G47230	Control and Salt	TF
#A69363	AT5G26030	Salt	NON_TF
#A69363	AT3G61190	Salt	NON_TF
#A69363	AT4G25960	Salt	NON_TF
#A69363	AT5G23520	Salt	NON_TF
#FFD602	AT1G28370	Control and Salt	TF
#A69363	AT1G73540	Salt	NON_TF
#A69363	AT4G17540	Salt	NON_TF
#A69363	AT2G02860	Salt	NON_TF
#A69363	AT5G24430	Salt	NON_TF
#A69363	AT4G20780	Salt	NON_TF
#A69363	AT3G23240	Salt	TF
#A69363	AT5G37770	Salt	NON_TF
#FFD602	AT5G67080	Control and Salt	NON_TF
#A69363	AT1G08940	Salt	NON_TF
#A69363	AT5G44580	Salt	NON_TF
#A69363	AT2G16365	Salt	NON_TF
#FFD602	AT3G23250	Control and Salt	TF
#A69363	AT5G25170	Salt	NON_TF
#A69363	AT2G02230	Salt	NON_TF
#A69363	AT5G36220	Salt	NON_TF
#A69363	AT1G16670	Salt	NON_TF
#A69363	AT4G39820	Salt	NON_TF
#A69363	AT2G33710	Salt	TF
#A69363	AT4G37780	Salt	TF
#A69363	AT4G27600	Salt	NON_TF
#A69363	AT3G08760	Salt	NON_TF
#A69363	AT1G08050	Salt	NON_TF
#A69363	AT5G42440	Salt	NON_TF
#A69363	AT3G21630	Salt	NON_TF
#A69363	AT4G23270	Salt	NON_TF
#A69363	AT3G49810	Salt	NON_TF
#A69363	AT4G16100	Salt	NON_TF
#A69363	AT1G19270	Salt	TF
#A69363	AT3G53810	Salt	NON_TF
#A69363	AT5G45280	Salt	NON_TF
#A69363	AT4G36670	Salt	NON_TF
#A69363	AT2G41380	Salt	NON_TF
#A69363	AT3G55410	Salt	NON_TF
#A69363	AT3G10640	Salt	NON_TF
#A69363	AT4G14220	Salt	NON_TF
#A69363	AT1G68620	Salt	NON_TF
#A69363	AT3G55980	Salt	TF
#A69363	AT1G16370	Salt	NON_TF
#A69363	AT4G01700	Salt	NON_TF
#A69363	AT3G59080	Salt	NON_TF
#A69363	AT3G57530	Salt	NON_TF
#A69363	AT5G39580	Salt	NON_TF
#A69363	AT3G46930	Salt	NON_TF
#A69363	AT1G18890	Salt	NON_TF
#A69363	AT2G40270	Salt	NON_TF
#A69363	AT5G67340	Salt	NON_TF
#A69363	AT5G57220	Salt	NON_TF
#A69363	AT2G20900	Salt	NON_TF
#A69363	AT4G39800	Salt	NON_TF
#A69363	AT5G63850	Salt	NON_TF
#A69363	AT4G23180	Salt	NON_TF
#A69363	AT1G63750	Salt	NON_TF
#A69363	AT5G25280	Salt	NON_TF
#A69363	AT4G19880	Salt	NON_TF
#A69363	AT1G28280	Salt	NON_TF
#A69363	AT2G27310	Salt	NON_TF
#A69363	AT1G61560	Salt	NON_TF
#A69363	AT4G13180	Salt	NON_TF
#A69363	AT1G25390	Salt	NON_TF
#A69363	AT5G15130	Salt	TF
#A69363	AT5G65290	Salt	NON_TF
#A69363	AT1G32920	Salt	NON_TF
#A69363	AT2G23170	Salt	NON_TF
#A69363	AT3G51890	Salt	NON_TF
#A69363	AT4G12720	Salt	NON_TF
#A69363	AT3G05200	Salt	NON_TF
#A69363	AT2G32150	Salt	NON_TF
#A69363	AT5G44910	Salt	NON_TF
#A69363	AT5G49760	Salt	NON_TF
#A69363	AT1G11310	Salt	NON_TF
#A69363	AT5G54860	Salt	NON_TF
#A69363	AT2G31880	Salt	NON_TF
#A69363	AT3G47540	Salt	NON_TF
#A69363	AT3G51090	Salt	NON_TF
#A69363	AT4G18250	Salt	NON_TF
#A69363	AT5G64890	Salt	NON_TF
#A69363	AT4G02410	Salt	NON_TF
#A69363	AT5G05730	Salt	NON_TF
#A69363	AT3G21700	Salt	NON_TF
#A69363	AT5G64470	Salt	NON_TF
#A69363	AT5G04930	Salt	NON_TF
#A69363	AT1G64610	Salt	NON_TF
#A69363	AT1G70750	Salt	NON_TF
#A69363	AT5G43430	Salt	NON_TF
#A69363	AT4G31800	Salt	TF
#A69363	AT5G49480	Salt	NON_TF
#A69363	AT1G51660	Salt	NON_TF
#A69363	AT2G37640	Salt	NON_TF
#A69363	AT5G54170	Salt	NON_TF
#A69363	AT3G59660	Salt	NON_TF
#A69363	AT5G05600	Salt	NON_TF
#FFD602	AT3G44260	Control and Salt	NON_TF
#FFD602	AT1G80840	Control and Salt	TF
#1E6B52	AT5G22250	Control	NON_TF
#A69363	AT2G20570	Salt	TF
#A69363	AT4G26890	Salt	NON_TF
#A69363	AT3G56880	Salt	NON_TF
#A69363	AT2G46330	Salt	NON_TF
#A69363	AT1G67800	Salt	NON_TF
#A69363	AT1G19770	Salt	NON_TF
#A69363	AT1G77640	Salt	TF
#A69363	AT1G61460	Salt	NON_TF
#A69363	AT5G60750	Salt	NON_TF
#A69363	AT5G56510	Salt	NON_TF
#A69363	AT1G67060	Salt	NON_TF
#A69363	AT1G56350	Salt	NON_TF
#A69363	AT1G58220	Salt	TF
#A69363	AT4G04610	Salt	NON_TF
#A69363	AT5G16520	Salt	NON_TF
#A69363	AT3G02990	Salt	TF
#A69363	AT5G62260	Salt	NON_TF
#A69363	AT1G72950	Salt	NON_TF
#A69363	AT3G12980	Salt	TF
#A69363	AT4G17900	Salt	TF
#A69363	AT1G67310	Salt	TF
#A69363	AT3G62610	Salt	TF
#A69363	AT5G11210	Salt	NON_TF
#A69363	AT1G34180	Salt	TF
#A69363	AT5G18540	Salt	NON_TF
#A69363	AT1G64280	Salt	TF
#A69363	AT3G53180	Salt	NON_TF
#A69363	AT5G03320	Salt	NON_TF
#A69363	AT1G58420	Salt	NON_TF
#A69363	AT5G46470	Salt	NON_TF
#A69363	AT2G47490	Salt	NON_TF
#A69363	AT5G48655	Salt	NON_TF
#A69363	AT2G47190	Salt	TF
#A69363	AT5G19400	Salt	NON_TF
#A69363	AT1G63740	Salt	NON_TF
#A69363	AT3G51680	Salt	NON_TF
#FFD602	AT1G32640	Control and Salt	TF
#A69363	AT1G80320	Salt	NON_TF
#A69363	AT4G02195	Salt	NON_TF
#A69363	AT4G11000	Salt	NON_TF
#A69363	AT2G17040	Salt	TF
#A69363	AT3G21650	Salt	NON_TF
#A69363	AT4G11600	Salt	NON_TF
#A69363	AT4G17250	Salt	NON_TF
#A69363	AT5G40540	Salt	NON_TF
#A69363	AT5G20230	Salt	NON_TF
#A69363	AT5G44050	Salt	NON_TF
#A69363	AT4G30430	Salt	NON_TF
#A69363	AT3G29400	Salt	NON_TF
#A69363	AT5G35410	Salt	NON_TF
#A69363	AT4G02200	Salt	NON_TF
#A69363	AT2G05120	Salt	NON_TF
#A69363	AT5G17650	Salt	NON_TF
#A69363	AT5G64870	Salt	NON_TF
#A69363	AT1G07520	Salt	TF
#A69363	AT1G78340	Salt	NON_TF
#A69363	AT4G12740	Salt	NON_TF
#A69363	AT5G04410	Salt	TF
#A69363	AT3G53400	Salt	NON_TF
#A69363	AT4G27657	Salt	NON_TF
#A69363	AT3G28940	Salt	NON_TF
#A69363	AT3G47390	Salt	NON_TF
#A69363	AT1G17930	Salt	NON_TF
#A69363	AT3G54000	Salt	NON_TF
#A69363	AT4G01250	Salt	TF
#A69363	AT1G76350	Salt	TF
#A69363	AT2G06530	Salt	NON_TF
#A69363	AT2G23270	Salt	NON_TF
#A69363	AT1G35910	Salt	NON_TF
#A69363	AT4G38420	Salt	NON_TF
#A69363	AT1G09060	Salt	TF
#A69363	AT4G15800	Salt	NON_TF
#A69363	AT5G64220	Salt	TF
#A69363	AT2G26540	Salt	NON_TF
#A69363	AT4G34390	Salt	NON_TF
#A69363	AT4G17615	Salt	NON_TF
#A69363	AT1G28530	Salt	NON_TF
#A69363	AT3G17690	Salt	NON_TF
#A69363	AT4G24160	Salt	NON_TF
#A69363	AT2G19270	Salt	NON_TF
#A69363	AT1G31130	Salt	NON_TF
#A69363	AT1G67880	Salt	NON_TF
#A69363	AT5G42010	Salt	NON_TF
#A69363	AT1G73805	Salt	NON_TF
#A69363	AT4G02340	Salt	NON_TF
#A69363	AT1G22510	Salt	NON_TF
#A69363	AT1G47990	Salt	NON_TF
#A69363	AT2G26520	Salt	NON_TF
#A69363	AT1G21910	Salt	TF
#A69363	AT1G77450	Salt	TF
#A69363	AT1G72280	Salt	NON_TF
#A69363	AT3G10500	Salt	TF
#A69363	AT2G46780	Salt	NON_TF
#A69363	AT5G03270	Salt	NON_TF
#A69363	AT5G41150	Salt	NON_TF
#A69363	AT2G45450	Salt	NON_TF
#A69363	AT1G72960	Salt	NON_TF
#A69363	AT5G46510	Salt	NON_TF
#A69363	AT2G22300	Salt	TF
#A69363	AT2G32020	Salt	TF
#A69363	AT4G24380	Salt	NON_TF
#A69363	AT2G26300	Salt	NON_TF
#A69363	AT5G20900	Salt	TF
#FFD602	AT2G35710	Control and Salt	NON_TF
#A69363	AT3G08730	Salt	NON_TF
#A69363	AT1G55920	Salt	NON_TF
#A69363	AT1G08860	Salt	NON_TF
#A69363	AT2G30070	Salt	NON_TF
#A69363	AT3G54150	Salt	NON_TF
#A69363	AT1G04960	Salt	NON_TF
#A69363	AT5G44870	Salt	NON_TF
#A69363	AT2G14960	Salt	NON_TF
#A69363	AT5G13820	Salt	NON_TF
#A69363	AT3G53450	Salt	NON_TF
#A69363	AT3G56050	Salt	NON_TF
#FFD602	AT5G61600	Control and Salt	TF
#A69363	AT3G44400	Salt	NON_TF
#A69363	AT4G30210	Salt	NON_TF
#A69363	AT5G46330	Salt	NON_TF
#A69363	AT5G48390	Salt	NON_TF
#A69363	AT2G20142	Salt	NON_TF
#A69363	AT1G42990	Salt	TF
#A69363	AT3G15070	Salt	NON_TF
#A69363	AT3G17920	Salt	NON_TF
#A69363	AT1G44830	Salt	TF
#A69363	AT5G61010	Salt	NON_TF
#A69363	AT3G55450	Salt	NON_TF
#A69363	AT5G47920	Salt	NON_TF
#A69363	AT3G13430	Salt	NON_TF
#A69363	AT5G16210	Salt	NON_TF
#A69363	AT4G09030	Salt	NON_TF
#A69363	AT3G17700	Salt	NON_TF
#A69363	AT1G59620	Salt	NON_TF
#A69363	AT5G45250	Salt	NON_TF
#A69363	AT1G80590	Salt	TF
#A69363	AT5G09630	Salt	NON_TF
#A69363	AT2G25690	Salt	NON_TF
#A69363	AT2G22860	Salt	NON_TF
#A69363	AT1G53060	Salt	NON_TF
#A69363	AT3G20620	Salt	NON_TF
#A69363	AT2G29990	Salt	NON_TF
#A69363	AT2G38470	Salt	TF
#A69363	AT4G10070	Salt	NON_TF
#A69363	AT5G52400	Salt	NON_TF
#A69363	AT3G57870	Salt	NON_TF
#A69363	AT2G27010	Salt	NON_TF
#A69363	AT3G19840	Salt	NON_TF
#A69363	AT4G30490	Salt	NON_TF
#A69363	AT2G41020	Salt	NON_TF
#A69363	AT5G56230	Salt	NON_TF
#A69363	AT5G67480	Salt	TF
#A69363	AT3G22830	Salt	TF
#A69363	AT1G09940	Salt	NON_TF
#A69363	AT4G02075	Salt	NON_TF
#A69363	AT5G40170	Salt	NON_TF
#A69363	AT1G04490	Salt	NON_TF
#A69363	AT1G69840	Salt	NON_TF
#A69363	AT2G20110	Salt	TF
#A69363	AT3G14990	Salt	NON_TF
#A69363	AT5G52750	Salt	NON_TF
#A69363	AT5G17760	Salt	NON_TF
#A69363	AT2G02800	Salt	NON_TF
#A69363	AT5G63790	Salt	TF
#A69363	AT4G24970	Salt	NON_TF
#A69363	AT5G04550	Salt	NON_TF
#A69363	AT5G24110	Salt	TF
#A69363	AT2G17220	Salt	NON_TF
#A69363	AT4G25490	Salt	TF
#A69363	AT4G31000	Salt	NON_TF
#A69363	AT5G54720	Salt	NON_TF
#A69363	AT1G05030	Salt	NON_TF
#A69363	AT4G25380	Salt	NON_TF
#A69363	AT3G25070	Salt	NON_TF
#A69363	AT4G28160	Salt	NON_TF
#A69363	AT5G19450	Salt	NON_TF
#A69363	AT3G56200	Salt	NON_TF
#A69363	AT1G22280	Salt	NON_TF
#A69363	AT3G23750	Salt	NON_TF
#A69363	AT1G27600	Salt	NON_TF
#A69363	AT5G57510	Salt	NON_TF
#A69363	AT1G53430	Salt	NON_TF
#A69363	AT1G42470	Salt	NON_TF
#A69363	AT1G69960	Salt	NON_TF
#A69363	AT2G44490	Salt	NON_TF
#A69363	AT2G33590	Salt	NON_TF
#A69363	AT3G28580	Salt	NON_TF
#A69363	AT4G26090	Salt	NON_TF
#A69363	AT1G15430	Salt	NON_TF
#A69363	AT1G54260	Salt	NON_TF
#A69363	AT3G06370	Salt	NON_TF
#A69363	AT2G32040	Salt	NON_TF
#A69363	AT1G13880	Salt	NON_TF
#A69363	AT3G55370	Salt	TF
#A69363	AT3G62010	Salt	NON_TF
#A69363	AT5G57340	Salt	NON_TF
#A69363	AT3G53480	Salt	NON_TF
#A69363	AT3G46110	Salt	NON_TF
#A69363	AT3G44630	Salt	NON_TF
#A69363	AT3G46600	Salt	TF
#A69363	AT3G49530	Salt	TF
#A69363	AT1G68920	Salt	TF
#A69363	AT3G12200	Salt	NON_TF
#FFD602	AT1G72360	Control and Salt	TF
#1E6B52	AT1G74940	Control	NON_TF
#1E6B52	AT3G02550	Control	TF
#1E6B52	AT3G23170	Control	NON_TF
#FFD602	AT4G24110	Control and Salt	NON_TF
#1E6B52	AT5G62520	Control	NON_TF
#1E6B52	AT4G10270	Control	NON_TF
#A69363	AT2G15890	Salt	NON_TF
#A69363	AT5G19120	Salt	NON_TF
#A69363	AT5G06560	Salt	NON_TF
#FFD602	AT3G04070	Control and Salt	TF
#FFD602	AT5G39050	Control and Salt	NON_TF
#A69363	AT5G54730	Salt	NON_TF
#A69363	AT3G21690	Salt	NON_TF
#A69363	AT4G37320	Salt	NON_TF
#A69363	AT4G35480	Salt	NON_TF
#1E6B52	AT5G28770	Control	TF
#1E6B52	AT1G28330	Control	NON_TF
#FFD602	AT5G13220	Control and Salt	TF
#A69363	AT3G53600	Salt	TF
#A69363	AT5G64905	Salt	NON_TF
#A69363	AT5G57190	Salt	NON_TF
#A69363	AT3G62110	Salt	NON_TF
#A69363	AT1G61370	Salt	NON_TF
#A69363	AT2G46150	Salt	NON_TF
#A69363	AT3G53150	Salt	NON_TF
#A69363	AT3G55950	Salt	NON_TF
#A69363	AT4G35910	Salt	NON_TF
#A69363	AT4G36780	Salt	TF
#A69363	AT4G14680	Salt	NON_TF
#A69363	AT4G22780	Salt	NON_TF
#A69363	AT1G21590	Salt	NON_TF
#A69363	AT5G59480	Salt	NON_TF
#A69363	AT3G57760	Salt	NON_TF
#A69363	AT4G12790	Salt	NON_TF
#A69363	AT3G23630	Salt	NON_TF
#A69363	AT4G36500	Salt	NON_TF
#A69363	AT1G63830	Salt	NON_TF
#A69363	AT2G36640	Salt	NON_TF
#A69363	AT2G46610	Salt	NON_TF
#A69363	AT5G54470	Salt	TF
#A69363	AT4G36510	Salt	NON_TF
#A69363	AT3G60390	Salt	TF
#A69363	AT1G65950	Salt	NON_TF
#A69363	AT3G23230	Salt	TF
#A69363	AT1G67970	Salt	TF
#A69363	AT4G29610	Salt	NON_TF
#A69363	AT2G34650	Salt	NON_TF
#A69363	AT4G37250	Salt	NON_TF
#A69363	AT1G07630	Salt	NON_TF
#A69363	AT1G53700	Salt	NON_TF
#A69363	AT5G53050	Salt	NON_TF
#A69363	AT1G20823	Salt	NON_TF
#A69363	AT2G46600	Salt	NON_TF
#A69363	AT1G11630	Salt	NON_TF
#A69363	AT2G31170	Salt	NON_TF
#A69363	AT3G18710	Salt	NON_TF
#A69363	AT5G58690	Salt	NON_TF
#A69363	AT4G23750	Salt	TF
#A69363	AT3G23030	Salt	TF
#A69363	AT2G22880	Salt	NON_TF
#A69363	AT1G36940	Salt	NON_TF
#A69363	AT5G14710	Salt	NON_TF
#A69363	AT4G36740	Salt	TF
#A69363	AT3G58090	Salt	NON_TF
#A69363	AT1G65390	Salt	NON_TF
#A69363	AT4G38900	Salt	TF
#A69363	AT3G55700	Salt	NON_TF
#A69363	AT1G72790	Salt	NON_TF
#A69363	AT3G57450	Salt	NON_TF
#A69363	AT4G21200	Salt	NON_TF
#A69363	AT3G57170	Salt	NON_TF
#A69363	AT3G56400	Salt	TF
#A69363	AT1G70700	Salt	TF
#A69363	AT1G13340	Salt	NON_TF
#A69363	AT5G58670	Salt	NON_TF
#A69363	AT5G62470	Salt	TF
#A69363	AT2G32030	Salt	TF
#A69363	AT4G37260	Salt	TF
#A69363	AT5G59550	Salt	NON_TF
#A69363	AT3G19380	Salt	NON_TF
#A69363	AT2G24520	Salt	NON_TF
#A69363	AT2G48010	Salt	NON_TF
#A69363	AT3G14070	Salt	NON_TF
#A69363	AT1G67920	Salt	NON_TF
#A69363	AT3G11580	Salt	TF
#A69363	AT2G45310	Salt	NON_TF
#A69363	AT5G59450	Salt	TF
#A69363	AT2G26530	Salt	NON_TF
#A69363	AT4G23610	Salt	NON_TF
#A69363	AT1G10300	Salt	NON_TF
#A69363	AT3G09910	Salt	NON_TF
#A69363	AT3G23220	Salt	TF
#A69363	AT5G65140	Salt	NON_TF
#A69363	AT5G22530	Salt	NON_TF
#A69363	AT1G77360	Salt	NON_TF
#A69363	AT3G22400	Salt	NON_TF
#A69363	AT5G65280	Salt	NON_TF
#A69363	AT4G27260	Salt	NON_TF
#A69363	AT4G11350	Salt	NON_TF
#A69363	AT5G59520	Salt	NON_TF
#A69363	AT2G33130	Salt	NON_TF
#A69363	AT1G31500	Salt	NON_TF
#FFD602	AT5G67300	Control and Salt	TF
#A69363	AT4G27652	Salt	NON_TF
#A69363	AT1G53170	Salt	TF
#A69363	AT1G10560	Salt	NON_TF
#A69363	AT5G58680	Salt	NON_TF
#A69363	AT1G25550	Salt	TF
#A69363	AT5G60270	Salt	NON_TF
#A69363	AT3G05320	Salt	NON_TF
#A69363	AT5G12050	Salt	NON_TF
#A69363	AT1G32970	Salt	NON_TF
#A69363	AT1G36640	Salt	NON_TF
#A69363	AT5G24600	Salt	NON_TF
#A69363	AT1G18740	Salt	NON_TF
#A69363	AT2G30130	Salt	TF
#A69363	AT1G61120	Salt	NON_TF
#A69363	AT2G22200	Salt	TF
#A69363	AT2G34070	Salt	NON_TF
#A69363	AT3G20430	Salt	NON_TF
#A69363	AT3G51450	Salt	NON_TF
#A69363	AT4G20010	Salt	NON_TF
#A69363	AT2G32140	Salt	NON_TF
#A69363	AT3G45960	Salt	NON_TF
#A69363	AT1G79310	Salt	NON_TF
#A69363	AT4G09570	Salt	NON_TF
#A69363	AT4G39570	Salt	NON_TF
#A69363	AT3G22250	Salt	NON_TF
#A69363	AT1G43160	Salt	TF
#A69363	AT2G33440	Salt	NON_TF
#A69363	AT1G49520	Salt	TF
#A69363	AT5G24470	Salt	TF
#A69363	AT3G14370	Salt	NON_TF
#A69363	AT3G63440	Salt	NON_TF
#A69363	AT3G44350	Salt	TF
#A69363	AT2G46510	Salt	TF
#A69363	AT4G24050	Salt	NON_TF
#A69363	AT1G06850	Salt	TF
#A69363	AT1G60010	Salt	NON_TF
#A69363	AT5G54640	Salt	TF
#A69363	AT1G78070	Salt	NON_TF
#A69363	AT3G27360	Salt	NON_TF
#A69363	AT5G54490	Salt	NON_TF
#A69363	AT1G74590	Salt	NON_TF
#A69363	AT5G10830	Salt	NON_TF
#A69363	AT4G36550	Salt	NON_TF
#A69363	AT1G68670	Salt	TF
#A69363	AT5G22540	Salt	NON_TF
#A69363	AT5G41810	Salt	NON_TF
#A69363	AT3G57070	Salt	NON_TF
#A69363	AT5G66310	Salt	NON_TF
#A69363	AT5G53010	Salt	NON_TF
#A69363	AT2G14290	Salt	NON_TF
#A69363	AT5G67230	Salt	NON_TF
#A69363	AT3G47960	Salt	NON_TF
#A69363	AT2G47300	Salt	NON_TF
#A69363	AT3G19200	Salt	NON_TF
#A69363	AT2G18350	Salt	TF
#A69363	AT1G69270	Salt	NON_TF
#A69363	AT1G61340	Salt	NON_TF
#A69363	AT3G54200	Salt	NON_TF
#A69363	AT1G74440	Salt	NON_TF
#A69363	AT5G44350	Salt	NON_TF
#A69363	AT2G34920	Salt	NON_TF
#A69363	AT1G49530	Salt	NON_TF
#A69363	AT3G19970	Salt	NON_TF
#A69363	AT1G74930	Salt	TF
#A69363	AT1G74430	Salt	TF
#A69363	AT1G35140	Salt	NON_TF
#A69363	AT5G01200	Salt	TF
#A69363	AT4G30440	Salt	NON_TF
#A69363	AT5G04480	Salt	NON_TF
#A69363	AT1G65430	Salt	NON_TF
#A69363	AT5G52070	Salt	NON_TF
#A69363	AT5G18400	Salt	NON_TF
#A69363	AT3G62240	Salt	NON_TF
#A69363	AT1G52200	Salt	NON_TF
#A69363	AT5G57550	Salt	NON_TF
#A69363	AT1G76360	Salt	NON_TF
#A69363	AT2G44970	Salt	NON_TF
#A69363	AT2G43620	Salt	NON_TF
#A69363	AT1G02910	Salt	NON_TF
#A69363	AT4G24240	Salt	TF
#A69363	AT4G26910	Salt	NON_TF
#A69363	AT2G28460	Salt	NON_TF
#A69363	AT5G39650	Salt	NON_TF
#A69363	AT3G07390	Salt	NON_TF
#A69363	AT2G40180	Salt	NON_TF
#A69363	AT5G04540	Salt	NON_TF
#A69363	AT5G05190	Salt	NON_TF
#A69363	AT2G47550	Salt	NON_TF
#A69363	AT4G33666	Salt	NON_TF
#A69363	AT4G28460	Salt	NON_TF
#A69363	AT5G25520	Salt	NON_TF
#A69363	AT2G20960	Salt	NON_TF
#A69363	AT1G62180	Salt	NON_TF
#A69363	AT3G01290	Salt	NON_TF
#A69363	AT5G62020	Salt	TF
#A69363	AT1G24140	Salt	NON_TF
#A69363	AT3G47210	Salt	NON_TF
#A69363	AT1G31290	Salt	NON_TF
#A69363	AT3G19680	Salt	NON_TF
#A69363	AT3G22370	Salt	NON_TF
#A69363	AT1G76600	Salt	NON_TF
#A69363	AT3G52400	Salt	NON_TF
#A69363	AT4G18010	Salt	NON_TF
#A69363	AT2G05940	Salt	NON_TF
#A69363	AT2G27080	Salt	NON_TF
#A69363	AT5G59820	Salt	TF
#A69363	AT3G13330	Salt	NON_TF
#A69363	AT5G64310	Salt	NON_TF
#FFD602	AT3G09600	Control and Salt	TF
#FFD602	AT1G01060	Control and Salt	TF
#A69363	AT3G26570	Salt	NON_TF
#A69363	AT4G32870	Salt	NON_TF
#A69363	AT1G61630	Salt	NON_TF
#A69363	AT1G52400	Salt	NON_TF
#A69363	AT1G67740	Salt	NON_TF
#A69363	AT4G36380	Salt	NON_TF
#A69363	AT3G14960	Salt	NON_TF
#A69363	AT4G05180	Salt	NON_TF
#A69363	AT3G56940	Salt	NON_TF
#A69363	AT1G12040	Salt	NON_TF
#A69363	AT2G47160	Salt	NON_TF
#A69363	AT1G67330	Salt	NON_TF
#A69363	AT4G35060	Salt	NON_TF
#A69363	AT2G34460	Salt	NON_TF
#A69363	AT1G74470	Salt	NON_TF
#A69363	AT3G26290	Salt	NON_TF
#A69363	AT4G16660	Salt	NON_TF
#A69363	AT4G00800	Salt	NON_TF
#A69363	AT5G50800	Salt	NON_TF
#A69363	AT1G13600	Salt	TF
#A69363	AT5G59700	Salt	NON_TF
#A69363	AT3G27310	Salt	NON_TF
#A69363	AT2G36970	Salt	NON_TF
#A69363	AT3G45210	Salt	NON_TF
#A69363	AT1G05290	Salt	TF
#A69363	AT1G80870	Salt	NON_TF
#A69363	AT1G18830	Salt	NON_TF
#A69363	AT4G28270	Salt	NON_TF
#A69363	AT3G02730	Salt	NON_TF
#A69363	AT4G26850	Salt	NON_TF
#A69363	AT5G59250	Salt	NON_TF
#A69363	AT1G08770	Salt	NON_TF
#A69363	AT5G62130	Salt	NON_TF
#A69363	AT5G43360	Salt	NON_TF
#A69363	AT2G31380	Salt	TF
#A69363	AT4G02770	Salt	NON_TF
#A69363	AT3G28550	Salt	NON_TF
#A69363	AT1G60000	Salt	NON_TF
#A69363	AT2G35260	Salt	NON_TF
#A69363	AT5G26980	Salt	NON_TF
#A69363	AT1G06680	Salt	NON_TF
#A69363	AT5G19560	Salt	NON_TF
#A69363	AT3G15360	Salt	NON_TF
#A69363	AT1G27740	Salt	TF
#A69363	AT2G29340	Salt	NON_TF
#A69363	AT5G13630	Salt	NON_TF
#A69363	AT1G76930	Salt	NON_TF
#A69363	AT4G18020	Salt	TF
#A69363	AT1G78290	Salt	NON_TF
#A69363	AT3G56630	Salt	NON_TF
#A69363	AT1G14345	Salt	NON_TF
#A69363	AT4G04640	Salt	NON_TF
#A69363	AT4G09650	Salt	NON_TF
#A69363	AT1G30850	Salt	NON_TF
#A69363	AT5G46230	Salt	NON_TF
#A69363	AT3G24670	Salt	NON_TF
#A69363	AT4G25250	Salt	NON_TF
#A69363	AT1G52870	Salt	NON_TF
#A69363	AT2G47540	Salt	NON_TF
#A69363	AT5G44190	Salt	TF
#A69363	AT2G39730	Salt	NON_TF
#A69363	AT1G23310	Salt	NON_TF
#A69363	AT4G25790	Salt	NON_TF
#A69363	AT2G38650	Salt	NON_TF
#A69363	AT5G40730	Salt	NON_TF
#A69363	AT5G67400	Salt	NON_TF
#A69363	AT1G44575	Salt	NON_TF
#A69363	AT4G33730	Salt	NON_TF
#A69363	AT4G33050	Salt	NON_TF
#A69363	AT1G35210	Salt	NON_TF
#A69363	AT5G64060	Salt	TF
#A69363	AT3G59220	Salt	NON_TF
#A69363	AT4G21390	Salt	NON_TF
#A69363	AT1G61380	Salt	NON_TF
#A69363	AT3G09270	Salt	NON_TF
#A69363	AT5G11970	Salt	NON_TF
#A69363	AT3G43250	Salt	NON_TF
#A69363	AT5G02020	Salt	NON_TF
#A69363	AT3G57330	Salt	NON_TF
#A69363	AT5G53200	Salt	TF
#A69363	AT4G29050	Salt	NON_TF
#A69363	AT1G24170	Salt	NON_TF
#A69363	AT1G07870	Salt	NON_TF
#A69363	AT5G41080	Salt	NON_TF
#A69363	AT5G10380	Salt	NON_TF
#FFD602	AT2G46830	Control and Salt	TF
#FFD602	AT5G58900	Control and Salt	TF
#1E6B52	AT5G24070	Control	NON_TF
#A69363	AT1G29480	Salt	NON_TF
#A69363	AT2G17230	Salt	NON_TF
#A69363	AT1G22620	Salt	NON_TF
#A69363	AT3G28780	Salt	NON_TF
#A69363	AT4G23070	Salt	NON_TF
#A69363	AT2G22750	Salt	TF
#A69363	AT1G19310	Salt	NON_TF
#A69363	AT5G04760	Salt	TF
#A69363	AT1G74950	Salt	TF
#A69363	AT2G36740	Salt	NON_TF
#A69363	AT4G39030	Salt	NON_TF
#A69363	AT1G29220	Salt	NON_TF
#A69363	AT2G24130	Salt	NON_TF
#A69363	AT1G79440	Salt	NON_TF
#A69363	AT3G04730	Salt	TF
#A69363	AT4G11330	Salt	NON_TF
#A69363	AT2G29480	Salt	NON_TF
#A69363	AT3G53990	Salt	NON_TF
#A69363	AT5G54230	Salt	TF
#A69363	AT5G03910	Salt	NON_TF
#A69363	AT5G27760	Salt	NON_TF
#A69363	AT3G04220	Salt	NON_TF
#A69363	AT2G38740	Salt	NON_TF
#A69363	AT4G08950	Salt	NON_TF
#A69363	AT3G15540	Salt	TF
#A69363	AT1G72240	Salt	NON_TF
#A69363	AT4G09970	Salt	NON_TF
#A69363	AT5G03720	Salt	TF
#A69363	AT3G50060	Salt	TF
#A69363	AT3G62100	Salt	TF
#A69363	AT1G66400	Salt	NON_TF
#A69363	AT3G55050	Salt	NON_TF
#A69363	AT2G44200	Salt	NON_TF
#A69363	AT1G76170	Salt	NON_TF
#A69363	AT5G61540	Salt	NON_TF
#A69363	AT2G24570	Salt	TF
#A69363	AT3G43700	Salt	NON_TF
#A69363	AT1G51310	Salt	NON_TF
#A69363	AT3G13650	Salt	NON_TF
#A69363	AT5G03120	Salt	NON_TF
#A69363	AT3G15210	Salt	TF
#A69363	AT2G30680	Salt	NON_TF
#A69363	AT4G37400	Salt	NON_TF
#A69363	AT5G59490	Salt	NON_TF
#A69363	AT5G23850	Salt	NON_TF
#A69363	AT3G29575	Salt	NON_TF
#A69363	AT1G32870	Salt	TF
#A69363	AT1G43000	Salt	TF
#A69363	AT1G68410	Salt	NON_TF
#A69363	AT1G51620	Salt	NON_TF
#A69363	AT1G01550	Salt	NON_TF
#A69363	AT5G02290	Salt	NON_TF
#A69363	AT1G56600	Salt	NON_TF
#A69363	AT1G70130	Salt	NON_TF
#A69363	AT3G22910	Salt	NON_TF
#A69363	AT2G01330	Salt	NON_TF
#A69363	AT3G29360	Salt	NON_TF
#A69363	AT1G70500	Salt	NON_TF
#A69363	AT5G22380	Salt	TF
#A69363	AT5G06500	Salt	TF
#A69363	AT3G48650	Salt	NON_TF
#A69363	AT3G60120	Salt	NON_TF
#A69363	AT5G02230	Salt	NON_TF
#A69363	AT5G46540	Salt	NON_TF
#A69363	AT4G22960	Salt	NON_TF
#A69363	AT1G69890	Salt	NON_TF
#A69363	AT4G11470	Salt	NON_TF
#A69363	AT3G57880	Salt	NON_TF
#A69363	AT5G04720	Salt	NON_TF
#A69363	AT5G02170	Salt	NON_TF
#A69363	AT2G39200	Salt	NON_TF
#A69363	AT1G68510	Salt	TF
#A69363	AT1G04500	Salt	TF
#A69363	AT1G60670	Salt	NON_TF
#A69363	AT4G23850	Salt	NON_TF
#A69363	AT5G64450	Salt	NON_TF
#A69363	AT4G16780	Salt	TF
#A69363	AT1G61360	Salt	NON_TF
#A69363	AT4G14365	Salt	NON_TF
#A69363	AT2G44500	Salt	NON_TF
#A69363	AT3G50660	Salt	NON_TF
#A69363	AT4G37710	Salt	NON_TF
#A69363	AT3G58620	Salt	NON_TF
#A69363	AT5G54510	Salt	NON_TF
#A69363	AT3G60420	Salt	NON_TF
#A69363	AT3G50760	Salt	NON_TF
#A69363	AT5G46710	Salt	TF
#A69363	AT2G34660	Salt	NON_TF
#A69363	AT3G48450	Salt	NON_TF
#A69363	AT3G49780	Salt	NON_TF
#A69363	AT1G07650	Salt	NON_TF
#A69363	AT2G19710	Salt	NON_TF
#A69363	AT1G61640	Salt	NON_TF
#A69363	AT4G30290	Salt	NON_TF
#A69363	AT4G26690	Salt	NON_TF
#A69363	AT4G33920	Salt	NON_TF
#A69363	AT1G34420	Salt	NON_TF
#A69363	AT5G06300	Salt	NON_TF
#A69363	AT3G56410	Salt	NON_TF
#A69363	AT1G61550	Salt	NON_TF
#A69363	AT4G39670	Salt	NON_TF
#A69363	AT1G32150	Salt	TF
#A69363	AT5G62090	Salt	NON_TF
#A69363	AT1G61900	Salt	NON_TF
#A69363	AT5G06770	Salt	TF
#A69363	AT4G32030	Salt	NON_TF
#A69363	AT2G04500	Salt	NON_TF
#A69363	AT1G76210	Salt	NON_TF
#A69363	AT5G02220	Salt	NON_TF
#A69363	AT1G04985	Salt	NON_TF
#A69363	AT5G25440	Salt	NON_TF
#A69363	AT5G65180	Salt	NON_TF
#A69363	AT1G28550	Salt	NON_TF
#A69363	AT5G48850	Salt	NON_TF
#A69363	AT5G01600	Salt	NON_TF
#A69363	AT5G10020	Salt	NON_TF
#A69363	AT3G60550	Salt	NON_TF
#A69363	AT5G64210	Salt	NON_TF
#A69363	AT4G25470	Salt	TF
#A69363	AT1G07500	Salt	NON_TF
#A69363	AT4G00300	Salt	NON_TF
#A69363	AT5G10070	Salt	NON_TF
#A69363	AT4G09160	Salt	NON_TF
#A69363	AT4G17410	Salt	NON_TF
#A69363	AT1G12030	Salt	NON_TF
#A69363	AT4G32890	Salt	TF
#A69363	AT5G52430	Salt	NON_TF
#A69363	AT2G04680	Salt	NON_TF
#A69363	AT3G01640	Salt	NON_TF
#A69363	AT3G07470	Salt	NON_TF
#A69363	AT5G04590	Salt	NON_TF
#A69363	AT4G29440	Salt	NON_TF
#A69363	AT4G39400	Salt	NON_TF
#A69363	AT2G27320	Salt	NON_TF
#A69363	AT1G30690	Salt	NON_TF
#A69363	AT2G41010	Salt	NON_TF
#A69363	AT3G14840	Salt	NON_TF
#A69363	AT2G39180	Salt	NON_TF
#A69363	AT2G35530	Salt	TF
#A69363	AT5G11380	Salt	NON_TF
#A69363	AT3G49380	Salt	NON_TF
#A69363	AT1G20780	Salt	NON_TF
#A69363	AT3G06500	Salt	NON_TF
#A69363	AT3G02680	Salt	TF
#A69363	AT2G38830	Salt	NON_TF
#A69363	AT4G15550	Salt	NON_TF
#A69363	AT2G02150	Salt	NON_TF
#A69363	AT3G06760	Salt	NON_TF
#A69363	AT1G74750	Salt	NON_TF
#A69363	AT5G41610	Salt	NON_TF
#A69363	AT1G44100	Salt	NON_TF
#A69363	AT2G23810	Salt	NON_TF
#A69363	AT5G54500	Salt	NON_TF
#A69363	AT4G24040	Salt	NON_TF
#A69363	AT1G34370	Salt	TF
#A69363	AT5G37070	Salt	NON_TF
#A69363	AT2G01430	Salt	TF
#A69363	AT3G61980	Salt	NON_TF
#A69363	AT3G48510	Salt	NON_TF
#A69363	AT5G07440	Salt	NON_TF
#A69363	AT3G12910	Salt	TF
#A69363	AT1G17170	Salt	NON_TF
#A69363	AT1G55970	Salt	TF
#A69363	AT2G47060	Salt	NON_TF
#A69363	AT1G68320	Salt	TF
#A69363	AT1G70780	Salt	NON_TF
#A69363	AT1G22810	Salt	TF
#A69363	AT1G22830	Salt	NON_TF
#A69363	AT1G17180	Salt	NON_TF
#A69363	AT2G33170	Salt	NON_TF
#A69363	AT5G46040	Salt	NON_TF
#A69363	AT5G28630	Salt	NON_TF
#A69363	AT4G34180	Salt	NON_TF
#A69363	AT2G39170	Salt	NON_TF
#A69363	AT1G78895	Salt	NON_TF
#A69363	AT1G12750	Salt	NON_TF
#A69363	AT5G45710	Salt	TF
#A69363	AT3G02070	Salt	NON_TF
#A69363	AT1G53980	Salt	NON_TF
#A69363	AT5G42390	Salt	NON_TF
#A69363	AT3G28740	Salt	NON_TF
#A69363	AT5G06480	Salt	NON_TF
#A69363	AT2G33700	Salt	NON_TF
#A69363	AT1G63720	Salt	NON_TF
#A69363	AT5G17990	Salt	NON_TF
#A69363	AT4G08040	Salt	NON_TF
#A69363	AT4G39780	Salt	TF
#A69363	AT5G16800	Salt	TF
#A69363	AT5G22850	Salt	NON_TF
#A69363	AT3G03660	Salt	TF
#A69363	AT5G51290	Salt	NON_TF
#A69363	AT5G04980	Salt	NON_TF
#A69363	AT2G29470	Salt	NON_TF
#A69363	AT1G59590	Salt	NON_TF
#A69363	AT3G25655	Salt	NON_TF
#A69363	AT1G69930	Salt	NON_TF
#A69363	AT4G32280	Salt	TF
#A69363	AT3G21620	Salt	NON_TF
#A69363	AT4G11480	Salt	NON_TF
#A69363	AT2G19190	Salt	NON_TF
#A69363	AT1G03370	Salt	NON_TF
#A69363	AT4G11890	Salt	NON_TF
#A69363	AT1G63840	Salt	NON_TF
#A69363	AT3G19010	Salt	NON_TF
#A69363	AT1G01340	Salt	NON_TF
#A69363	AT3G18100	Salt	TF
#A69363	AT4G39270	Salt	NON_TF
#A69363	AT2G25190	Salt	NON_TF
#A69363	AT3G23590	Salt	NON_TF
#A69363	AT4G33985	Salt	NON_TF
#A69363	AT1G67890	Salt	NON_TF
#A69363	AT3G44735	Salt	NON_TF
#A69363	AT5G04330	Salt	NON_TF
#A69363	AT1G06050	Salt	NON_TF
#A69363	AT5G66620	Salt	TF
#A69363	AT1G25560	Salt	TF
#A69363	AT1G04990	Salt	TF
#A69363	AT5G39040	Salt	NON_TF
#A69363	AT3G07650	Salt	TF
#A69363	AT1G58410	Salt	NON_TF
#A69363	AT4G11850	Salt	NON_TF
#A69363	AT2G14680	Salt	NON_TF
#A69363	AT2G27760	Salt	NON_TF
#A69363	AT3G53340	Salt	TF
#A69363	AT1G25290	Salt	NON_TF
#A69363	AT2G21900	Salt	TF
#A69363	AT4G39830	Salt	NON_TF
#A69363	AT5G41550	Salt	NON_TF
#A69363	AT2G37430	Salt	TF
#A69363	AT1G21530	Salt	NON_TF
#A69363	AT1G78000	Salt	NON_TF
#A69363	AT1G66780	Salt	NON_TF
#A69363	AT5G43100	Salt	NON_TF
#A69363	AT5G22690	Salt	NON_TF
#A69363	AT3G05390	Salt	NON_TF
#A69363	AT3G55740	Salt	NON_TF
#A69363	AT5G60280	Salt	NON_TF
#A69363	AT4G16760	Salt	NON_TF
#A69363	AT3G23550	Salt	NON_TF
#A69363	AT5G08139	Salt	NON_TF
#A69363	AT5G58940	Salt	NON_TF
#A69363	AT2G01180	Salt	NON_TF
#A69363	AT1G75490	Salt	TF
#A69363	AT5G37490	Salt	NON_TF
#A69363	AT1G72840	Salt	NON_TF
#A69363	AT4G25520	Salt	NON_TF
#A69363	AT3G21070	Salt	NON_TF
#A69363	AT5G59070	Salt	NON_TF
#A69363	AT5G15870	Salt	NON_TF
#A69363	AT1G31930	Salt	NON_TF
#A69363	AT5G02780	Salt	NON_TF
#A69363	AT1G25275	Salt	NON_TF
#A69363	AT5G44090	Salt	NON_TF
#A69363	AT2G11520	Salt	NON_TF
#A69363	AT2G42060	Salt	NON_TF
#A69363	AT5G40590	Salt	NON_TF
#A69363	AT1G66090	Salt	NON_TF
#A69363	AT5G11850	Salt	NON_TF
#A69363	AT5G57560	Salt	NON_TF
#A69363	AT5G45350	Salt	NON_TF
#A69363	AT5G64230	Salt	NON_TF
#A69363	AT1G14070	Salt	NON_TF
#A69363	AT3G56440	Salt	NON_TF
#A69363	AT5G66640	Salt	NON_TF
#A69363	AT1G01480	Salt	NON_TF
#A69363	AT1G69810	Salt	TF
#A69363	AT2G01300	Salt	NON_TF
#A69363	AT1G68330	Salt	NON_TF
#A69363	AT2G37060	Salt	TF
#A69363	AT4G12120	Salt	NON_TF
#A69363	AT2G04040	Salt	NON_TF
#A69363	AT5G44990	Salt	NON_TF
#A69363	AT2G28305	Salt	NON_TF
#A69363	AT2G17000	Salt	NON_TF
#A69363	AT5G13810	Salt	NON_TF
#A69363	AT3G07960	Salt	NON_TF
#A69363	AT3G60310	Salt	NON_TF
#A69363	AT2G21120	Salt	NON_TF
#A69363	AT5G59430	Salt	NON_TF
#A69363	AT1G10050	Salt	NON_TF
#A69363	AT2G38250	Salt	TF
#A69363	AT1G02170	Salt	NON_TF
#A69363	AT1G42980	Salt	NON_TF
#A69363	AT1G27760	Salt	NON_TF
#A69363	AT4G34400	Salt	TF
#A69363	AT2G41100	Salt	NON_TF
#A69363	AT3G61630	Salt	TF
#A69363	AT1G70520	Salt	NON_TF
#A69363	AT5G43380	Salt	NON_TF
#A69363	AT5G35320	Salt	NON_TF
#A69363	AT1G16150	Salt	NON_TF
#A69363	AT4G21990	Salt	NON_TF
#A69363	AT5G61820	Salt	NON_TF
#A69363	AT3G06480	Salt	NON_TF
#A69363	AT1G27630	Salt	NON_TF
#A69363	AT2G21910	Salt	NON_TF
#A69363	AT5G52760	Salt	NON_TF
#A69363	AT5G57000	Salt	NON_TF
#A69363	AT5G48340	Salt	NON_TF
#A69363	AT4G09560	Salt	NON_TF
#A69363	AT2G20440	Salt	NON_TF
#A69363	AT3G24050	Salt	TF
#A69363	AT4G12840	Salt	NON_TF
#A69363	AT5G49580	Salt	NON_TF
#A69363	AT4G32660	Salt	NON_TF
#A69363	AT5G21090	Salt	NON_TF
#A69363	AT1G56170	Salt	TF
#A69363	AT5G51440	Salt	NON_TF
#A69363	AT5G45630	Salt	NON_TF
#A69363	AT5G42900	Salt	NON_TF
#A69363	AT5G22450	Salt	NON_TF
#A69363	AT5G53130	Salt	NON_TF
#A69363	AT4G33940	Salt	NON_TF
#A69363	AT2G27350	Salt	NON_TF
#A69363	AT3G29060	Salt	NON_TF
#A69363	AT1G23560	Salt	NON_TF
#A69363	AT3G01650	Salt	NON_TF
#A69363	AT4G19990	Salt	TF
#A69363	AT4G02170	Salt	NON_TF
#A69363	AT1G30620	Salt	NON_TF
#A69363	AT4G24740	Salt	NON_TF
#A69363	AT4G31780	Salt	NON_TF
#A69363	AT3G14075	Salt	NON_TF
#A69363	AT2G22470	Salt	NON_TF
#A69363	AT5G55100	Salt	NON_TF
#A69363	AT1G56560	Salt	NON_TF
#A69363	AT2G31010	Salt	NON_TF
#A69363	AT2G17120	Salt	NON_TF
#A69363	AT4G00330	Salt	NON_TF
#A69363	AT3G57460	Salt	NON_TF
#A69363	AT4G33905	Salt	NON_TF
#A69363	AT2G38790	Salt	NON_TF
#A69363	AT2G48160	Salt	NON_TF
#A69363	AT3G07820	Salt	NON_TF
#A69363	AT2G29100	Salt	NON_TF
#A69363	AT5G49520	Salt	TF
#A69363	AT2G47520	Salt	TF
#A69363	AT1G26970	Salt	NON_TF
#A69363	AT2G41730	Salt	NON_TF
#A69363	AT4G38400	Salt	NON_TF
#A69363	AT4G17260	Salt	NON_TF
#A69363	AT4G24350	Salt	NON_TF
#A69363	AT1G21080	Salt	NON_TF
#A69363	AT1G62310	Salt	TF
#A69363	AT1G69430	Salt	NON_TF
#A69363	AT5G46910	Salt	TF
#A69363	AT3G54810	Salt	TF
#A69363	AT1G62720	Salt	NON_TF
#A69363	AT1G52890	Salt	TF
#A69363	AT5G14640	Salt	NON_TF
#A69363	AT4G15260	Salt	NON_TF
#A69363	AT2G22010	Salt	NON_TF
#A69363	AT1G49050	Salt	NON_TF
#A69363	AT1G12950	Salt	NON_TF
#A69363	AT1G59740	Salt	NON_TF
#A69363	AT1G69330	Salt	NON_TF
#A69363	AT4G18170	Salt	TF
#A69363	AT3G63350	Salt	TF
#A69363	AT3G63380	Salt	NON_TF
#A69363	AT4G33980	Salt	NON_TF
#A69363	AT1G16160	Salt	NON_TF
#A69363	AT1G14530	Salt	NON_TF
#A69363	AT1G68765	Salt	NON_TF
#A69363	AT4G37370	Salt	NON_TF
#A69363	AT5G66810	Salt	NON_TF
#A69363	AT1G14550	Salt	NON_TF
#A69363	AT2G47780	Salt	NON_TF
#A69363	AT5G46550	Salt	NON_TF
#A69363	AT2G44850	Salt	NON_TF
#A69363	AT5G38895	Salt	NON_TF
#A69363	AT2G27150	Salt	NON_TF
#A69363	AT3G07040	Salt	NON_TF
#A69363	AT2G31340	Salt	NON_TF
#A69363	AT2G38760	Salt	NON_TF
#A69363	AT3G62260	Salt	TF
#A69363	AT5G04840	Salt	NON_TF
#A69363	AT4G37770	Salt	NON_TF
#A69363	AT5G35430	Salt	NON_TF
#A69363	AT2G21280	Salt	NON_TF
#A69363	AT4G31540	Salt	NON_TF
#A69363	AT5G66815	Salt	NON_TF
#A69363	AT5G13500	Salt	NON_TF
#A69363	AT5G24660	Salt	NON_TF
#A69363	AT3G55730	Salt	TF
#A69363	AT1G65730	Salt	NON_TF
#A69363	AT3G50930	Salt	NON_TF
#A69363	AT2G41180	Salt	NON_TF
#A69363	AT2G46735	Salt	NON_TF
#A69363	AT5G62430	Salt	TF
#A69363	AT2G30930	Salt	NON_TF
#A69363	AT4G38540	Salt	NON_TF
#A69363	AT2G23770	Salt	NON_TF
#A69363	AT1G72060	Salt	NON_TF
#A69363	AT5G67350	Salt	NON_TF
#A69363	AT2G36950	Salt	NON_TF
#A69363	AT5G26340	Salt	NON_TF
#A69363	AT3G11700	Salt	NON_TF
#A69363	AT5G03630	Salt	NON_TF
#A69363	AT3G54130	Salt	NON_TF
#A69363	AT1G15890	Salt	NON_TF
#A69363	AT2G17520	Salt	NON_TF
#A69363	AT5G42050	Salt	NON_TF
#A69363	AT1G56060	Salt	NON_TF
#A69363	AT4G26200	Salt	NON_TF
#A69363	AT1G30110	Salt	NON_TF
#A69363	AT3G15060	Salt	NON_TF
#A69363	AT2G42980	Salt	NON_TF
#A69363	AT4G18990	Salt	NON_TF
#A69363	AT1G12360	Salt	NON_TF
#A69363	AT3G47380	Salt	NON_TF
#A69363	AT5G43450	Salt	NON_TF
#A69363	AT5G66850	Salt	NON_TF
#A69363	AT2G15780	Salt	NON_TF
#A69363	AT5G61890	Salt	TF
#A69363	AT1G65610	Salt	NON_TF
#A69363	AT5G52200	Salt	NON_TF
#A69363	AT5G14310	Salt	NON_TF
#A69363	AT4G23320	Salt	NON_TF
#A69363	AT4G37910	Salt	NON_TF
#A69363	AT1G63500	Salt	NON_TF
#A69363	AT3G06190	Salt	NON_TF
#A69363	AT1G23710	Salt	NON_TF
#A69363	AT5G54400	Salt	NON_TF
#A69363	AT1G08980	Salt	NON_TF
#A69363	AT5G62480	Salt	NON_TF
#A69363	AT5G44210	Salt	TF
#A69363	AT5G26990	Salt	NON_TF
#A69363	AT2G42770	Salt	NON_TF
#A69363	AT3G46040	Salt	NON_TF
#A69363	AT5G52060	Salt	NON_TF
#A69363	AT3G57290	Salt	NON_TF
#A69363	AT2G23070	Salt	NON_TF
#A69363	AT5G04430	Salt	NON_TF
#A69363	AT1G45130	Salt	NON_TF
#A69363	AT1G79650	Salt	NON_TF
#A69363	AT5G67510	Salt	NON_TF
#A69363	AT4G30620	Salt	NON_TF
#A69363	AT5G11980	Salt	NON_TF
#A69363	AT3G49670	Salt	NON_TF
#A69363	AT1G02560	Salt	NON_TF
#A69363	AT5G23010	Salt	NON_TF
#A69363	AT1G18250	Salt	NON_TF
#A69363	AT5G49960	Salt	NON_TF
#A69363	AT5G10390	Salt	NON_TF
#A69363	AT4G37650	Salt	TF
#A69363	AT3G16950	Salt	NON_TF
#A69363	AT5G42240	Salt	NON_TF
#A69363	AT3G24660	Salt	NON_TF
#A69363	AT2G47590	Salt	NON_TF
#A69363	AT4G29680	Salt	NON_TF
#A69363	AT1G70370	Salt	NON_TF
#A69363	AT3G48190	Salt	NON_TF
#A69363	AT3G43810	Salt	NON_TF
#A69363	AT3G22960	Salt	NON_TF
#A69363	AT4G33380	Salt	NON_TF
#A69363	AT4G39120	Salt	NON_TF
#A69363	AT1G26650	Salt	NON_TF
#A69363	AT4G30020	Salt	NON_TF
#A69363	AT1G29980	Salt	NON_TF
#A69363	AT2G40316	Salt	NON_TF
#A69363	AT5G58960	Salt	NON_TF
#A69363	AT5G40770	Salt	NON_TF
#A69363	AT5G47680	Salt	NON_TF
#A69363	AT4G11290	Salt	NON_TF
#A69363	AT2G27450	Salt	NON_TF
#A69363	AT2G43100	Salt	NON_TF
#A69363	AT1G56180	Salt	NON_TF
#A69363	AT5G26850	Salt	NON_TF
#A69363	AT4G02030	Salt	NON_TF
#A69363	AT4G36940	Salt	NON_TF
#A69363	AT1G19715	Salt	NON_TF
#A69363	AT4G00740	Salt	NON_TF
#A69363	AT2G39900	Salt	TF
#A69363	AT5G10750	Salt	NON_TF
#A69363	AT1G79790	Salt	NON_TF
#A69363	AT2G27260	Salt	NON_TF
#A69363	AT2G27730	Salt	NON_TF
#A69363	AT2G17450	Salt	NON_TF
#A69363	AT3G57490	Salt	NON_TF
#A69363	AT2G45470	Salt	NON_TF
#A69363	AT3G49350	Salt	NON_TF
#A69363	AT5G61130	Salt	NON_TF
#A69363	AT3G54650	Salt	NON_TF
#A69363	AT3G03220	Salt	NON_TF
#A69363	AT1G07370	Salt	NON_TF
#A69363	AT3G54210	Salt	NON_TF
#A69363	AT3G20790	Salt	NON_TF
#A69363	AT2G19580	Salt	NON_TF
#A69363	AT1G47290	Salt	NON_TF
#A69363	AT1G64520	Salt	NON_TF
#A69363	AT5G02820	Salt	NON_TF
#A69363	AT3G20000	Salt	NON_TF
#A69363	AT4G01900	Salt	NON_TF
#A69363	AT2G45160	Salt	TF
#A69363	AT3G14310	Salt	NON_TF
#A69363	AT2G21380	Salt	NON_TF
#A69363	AT1G29050	Salt	NON_TF
#A69363	AT5G40610	Salt	NON_TF
#A69363	AT5G11340	Salt	TF
#A69363	AT3G02630	Salt	NON_TF
#A69363	AT5G54430	Salt	NON_TF
#A69363	AT3G63250	Salt	NON_TF
#A69363	AT4G36680	Salt	NON_TF
#A69363	AT2G27720	Salt	NON_TF
#A69363	AT2G43030	Salt	NON_TF
#A69363	AT5G63960	Salt	NON_TF
#A69363	AT5G23310	Salt	NON_TF
#A69363	AT3G61210	Salt	NON_TF
#A69363	AT2G45010	Salt	NON_TF
#A69363	AT4G25835	Salt	NON_TF
#A69363	AT1G04680	Salt	NON_TF
#A69363	AT1G29470	Salt	NON_TF
#A69363	AT3G22231	Salt	NON_TF
#A69363	AT1G09780	Salt	NON_TF
#A69363	AT5G56220	Salt	NON_TF
#A69363	AT3G26710	Salt	NON_TF
#A69363	AT4G32120	Salt	NON_TF
#A69363	AT1G72810	Salt	NON_TF
#A69363	AT2G31070	Salt	TF
#A69363	AT5G10360	Salt	NON_TF
#A69363	AT3G44380	Salt	NON_TF
#A69363	AT1G67590	Salt	NON_TF
#A69363	AT2G28000	Salt	NON_TF
#A69363	AT5G49830	Salt	NON_TF
#A69363	AT3G09570	Salt	NON_TF
#A69363	AT5G51550	Salt	NON_TF
#A69363	AT1G15700	Salt	NON_TF
#A69363	AT3G27330	Salt	NON_TF
#A69363	AT4G17790	Salt	NON_TF
#A69363	AT5G09900	Salt	NON_TF
#A69363	AT1G28440	Salt	NON_TF
#A69363	AT1G10030	Salt	NON_TF
#A69363	AT5G67070	Salt	NON_TF
#A69363	AT3G60750	Salt	NON_TF
#A69363	AT3G51350	Salt	NON_TF
#A69363	AT5G47840	Salt	NON_TF
#A69363	AT1G05070	Salt	NON_TF
#A69363	AT5G02450	Salt	NON_TF
#A69363	AT1G19110	Salt	NON_TF
#A69363	AT5G12470	Salt	NON_TF
#A69363	AT1G24610	Salt	TF
#A69363	AT2G31360	Salt	NON_TF
#A69363	AT1G03475	Salt	NON_TF
#A69363	AT3G56990	Salt	NON_TF
#A69363	AT2G28250	Salt	NON_TF
#A69363	AT2G43360	Salt	NON_TF
#A69363	AT4G23740	Salt	NON_TF
#A69363	AT4G34110	Salt	NON_TF
#A69363	AT3G49080	Salt	NON_TF
#A69363	AT1G64750	Salt	NON_TF
#A69363	AT1G53240	Salt	NON_TF
#A69363	AT5G38630	Salt	NON_TF
#A69363	AT2G39670	Salt	NON_TF
#A69363	AT1G58150	Salt	NON_TF
#A69363	AT5G58930	Salt	NON_TF
#A69363	AT3G17170	Salt	NON_TF
#A69363	AT5G11690	Salt	NON_TF
#A69363	AT2G25840	Salt	NON_TF
#A69363	AT5G58090	Salt	NON_TF
#A69363	AT5G01020	Salt	NON_TF
#A69363	AT4G14390	Salt	NON_TF
#A69363	AT5G10560	Salt	NON_TF
#A69363	AT3G01280	Salt	NON_TF
#A69363	AT5G22390	Salt	NON_TF
#A69363	AT5G11070	Salt	NON_TF
#A69363	AT4G24390	Salt	NON_TF
#A69363	AT3G02640	Salt	NON_TF
#A69363	AT1G09210	Salt	NON_TF
#A69363	AT1G55360	Salt	NON_TF
#A69363	AT1G63470	Salt	NON_TF
#A69363	AT5G06050	Salt	NON_TF
#A69363	AT1G23750	Salt	NON_TF
#A69363	AT5G50000	Salt	NON_TF
#A69363	AT3G11590	Salt	NON_TF
#A69363	AT2G28600	Salt	NON_TF
#A69363	AT3G03920	Salt	NON_TF
#A69363	AT3G22425	Salt	NON_TF
#A69363	AT1G43580	Salt	NON_TF
#A69363	AT1G48610	Salt	NON_TF
#A69363	AT2G27020	Salt	NON_TF
#A69363	AT1G07020	Salt	NON_TF
#A69363	AT1G21440	Salt	NON_TF
#A69363	AT5G65010	Salt	NON_TF
#A69363	AT3G22780	Salt	TF
#A69363	AT2G27510	Salt	NON_TF
#A69363	AT5G04510	Salt	NON_TF
#A69363	AT2G03510	Salt	NON_TF
#A69363	AT2G38560	Salt	NON_TF
#A69363	AT1G67630	Salt	NON_TF
#A69363	AT3G49100	Salt	NON_TF
#A69363	AT2G28790	Salt	NON_TF
#A69363	AT3G54560	Salt	NON_TF
#A69363	AT3G04470	Salt	NON_TF
#A69363	AT1G51570	Salt	NON_TF
#A69363	AT1G71860	Salt	NON_TF
#A69363	AT3G49500	Salt	NON_TF
#A69363	AT3G04940	Salt	NON_TF
#A69363	AT1G15390	Salt	NON_TF
#A69363	AT1G75680	Salt	NON_TF
#A69363	AT1G56110	Salt	NON_TF
#A69363	AT4G10450	Salt	NON_TF
#A69363	AT3G56130	Salt	NON_TF
#A69363	AT2G44860	Salt	NON_TF
#A69363	AT1G07320	Salt	NON_TF
#A69363	AT3G53900	Salt	NON_TF
#A69363	AT5G66440	Salt	NON_TF
#A69363	AT1G70470	Salt	NON_TF
#A69363	AT1G22780	Salt	NON_TF
#A69363	AT5G57440	Salt	NON_TF
#A69363	AT5G07590	Salt	NON_TF
#A69363	AT1G01910	Salt	NON_TF
#A69363	AT1G72090	Salt	NON_TF
#A69363	AT1G21090	Salt	NON_TF
#A69363	AT3G02080	Salt	NON_TF
#A69363	AT1G18690	Salt	NON_TF
#A69363	AT5G11420	Salt	NON_TF
#A69363	AT4G40060	Salt	TF
#A69363	AT2G24020	Salt	NON_TF
#A69363	AT3G15480	Salt	NON_TF
#A69363	AT1G19000	Salt	TF
#A69363	AT3G48730	Salt	NON_TF
#A69363	AT1G21880	Salt	NON_TF
#A69363	AT1G29790	Salt	NON_TF
#A69363	AT5G05000	Salt	NON_TF
#A69363	AT4G00560	Salt	NON_TF
#A69363	AT2G34150	Salt	NON_TF
#A69363	AT4G28050	Salt	NON_TF
#A69363	AT1G20540	Salt	NON_TF
#A69363	AT2G27810	Salt	NON_TF
#A69363	AT5G62890	Salt	NON_TF
#A69363	AT3G17840	Salt	NON_TF
#A69363	AT3G57050	Salt	NON_TF
#A69363	AT5G01650	Salt	NON_TF
#A69363	AT5G20720	Salt	NON_TF
#A69363	AT4G32330	Salt	NON_TF
#A69363	AT3G60770	Salt	NON_TF
#A69363	AT1G20010	Salt	NON_TF
#A69363	AT5G52540	Salt	NON_TF
#A69363	AT1G74030	Salt	NON_TF
#A69363	AT3G45310	Salt	NON_TF
#A69363	AT2G31790	Salt	NON_TF
#A69363	AT1G05850	Salt	NON_TF
#A69363	AT4G38660	Salt	NON_TF
#A69363	AT5G49820	Salt	NON_TF
#A69363	AT2G33800	Salt	NON_TF
#A69363	AT5G23540	Salt	NON_TF
#A69363	AT2G43640	Salt	NON_TF
#A69363	AT4G35020	Salt	NON_TF
#A69363	AT3G59980	Salt	NON_TF
#A69363	AT3G57610	Salt	NON_TF
#A69363	AT4G26760	Salt	NON_TF
#A69363	AT5G59380	Salt	NON_TF
#A69363	AT5G17770	Salt	NON_TF
#A69363	AT1G70710	Salt	NON_TF
#A69363	AT3G27230	Salt	NON_TF
#A69363	AT4G36660	Salt	NON_TF
#A69363	AT3G25860	Salt	NON_TF
#A69363	AT2G24790	Salt	TF
#A69363	AT1G78020	Salt	NON_TF
#A69363	AT1G73180	Salt	NON_TF
#A69363	AT5G52920	Salt	NON_TF
#A69363	AT5G67150	Salt	NON_TF
#A69363	AT5G49555	Salt	NON_TF
#A69363	AT2G31750	Salt	NON_TF
#A69363	AT5G19370	Salt	NON_TF
#A69363	AT3G56680	Salt	NON_TF
#A69363	AT1G29660	Salt	NON_TF
#A69363	AT1G12230	Salt	NON_TF
#A69363	AT1G19440	Salt	NON_TF
#A69363	AT4G29735	Salt	NON_TF
#A69363	AT3G60740	Salt	NON_TF
#A69363	AT5G22620	Salt	NON_TF
#A69363	AT5G50180	Salt	NON_TF
#A69363	AT3G12610	Salt	NON_TF
#A69363	AT3G06750	Salt	NON_TF
#A69363	AT1G33990	Salt	NON_TF
#A69363	AT1G08660	Salt	NON_TF
#A69363	AT5G13000	Salt	NON_TF
#A69363	AT5G63400	Salt	NON_TF
#A69363	AT2G18390	Salt	NON_TF
#A69363	AT2G24590	Salt	NON_TF
#A69363	AT3G16310	Salt	NON_TF
#A69363	AT1G02120	Salt	NON_TF
#A69363	AT5G06550	Salt	TF
#A69363	AT1G61770	Salt	NON_TF
#A69363	AT5G02100	Salt	NON_TF
#A69363	AT2G21050	Salt	NON_TF
#A69363	AT2G21160	Salt	NON_TF
#A69363	AT3G45090	Salt	NON_TF
#A69363	AT5G01890	Salt	NON_TF
#A69363	AT5G02870	Salt	NON_TF
#A69363	AT2G34300	Salt	NON_TF
#A69363	AT3G14240	Salt	NON_TF
#A69363	AT1G32210	Salt	NON_TF
#A69363	AT5G47770	Salt	NON_TF
#A69363	AT3G46560	Salt	NON_TF
#A69363	AT3G56370	Salt	NON_TF
#A69363	AT5G63660	Salt	NON_TF
#A69363	AT3G51260	Salt	NON_TF
#A69363	AT1G75140	Salt	NON_TF
#A69363	AT2G39430	Salt	NON_TF
#A69363	AT4G29020	Salt	NON_TF
#A69363	AT1G12000	Salt	NON_TF
#A69363	AT2G20450	Salt	NON_TF
#A69363	AT3G63200	Salt	NON_TF
#A69363	AT4G12880	Salt	NON_TF
#A69363	AT4G34200	Salt	NON_TF
#A69363	AT1G31230	Salt	NON_TF
#A69363	AT4G39880	Salt	NON_TF
#A69363	AT5G27470	Salt	NON_TF
#A69363	AT1G13280	Salt	NON_TF
#A69363	AT3G27280	Salt	NON_TF
#A69363	AT2G16270	Salt	NON_TF
#A69363	AT2G43290	Salt	NON_TF
#A69363	AT2G36160	Salt	NON_TF
#A69363	AT2G39280	Salt	NON_TF
#A69363	AT2G30200	Salt	NON_TF
#A69363	AT3G03160	Salt	NON_TF
#A69363	AT5G53650	Salt	NON_TF
#A69363	AT1G15100	Salt	NON_TF
#A69363	AT4G14000	Salt	NON_TF
#A69363	AT2G40640	Salt	NON_TF
#A69363	AT5G39320	Salt	NON_TF
#A69363	AT1G66430	Salt	NON_TF
#A69363	AT3G02580	Salt	NON_TF
#A69363	AT4G28650	Salt	NON_TF
#A69363	AT4G01310	Salt	NON_TF
#A69363	AT1G49580	Salt	NON_TF
#A69363	AT2G26590	Salt	NON_TF
#A69363	AT2G19740	Salt	NON_TF
#A69363	AT5G46560	Salt	NON_TF
#A69363	AT5G60310	Salt	NON_TF
#A69363	AT5G11250	Salt	NON_TF
#A69363	AT5G06780	Salt	NON_TF
#A69363	AT1G12740	Salt	NON_TF
#A69363	AT1G13630	Salt	NON_TF
#A69363	AT2G04430	Salt	NON_TF
#A69363	AT5G59980	Salt	NON_TF
#A69363	AT5G10900	Salt	NON_TF
#A69363	AT1G34470	Salt	NON_TF
#A69363	AT5G27860	Salt	NON_TF
#A69363	AT2G42400	Salt	TF
#A69363	AT1G76810	Salt	NON_TF
#A69363	AT2G46640	Salt	NON_TF
#A69363	AT3G12100	Salt	NON_TF
#A69363	AT3G08990	Salt	NON_TF
#A69363	AT2G02450	Salt	TF
#A69363	AT2G37210	Salt	NON_TF
#A69363	AT2G24300	Salt	NON_TF
#A69363	AT1G03905	Salt	NON_TF
#A69363	AT1G27770	Salt	NON_TF
#A69363	AT2G31740	Salt	NON_TF
#A69363	AT2G29110	Salt	NON_TF
#A69363	AT1G18750	Salt	TF
#A69363	AT2G27270	Salt	NON_TF
#A69363	AT1G31350	Salt	NON_TF
#A69363	AT5G51460	Salt	NON_TF
#A69363	AT1G65310	Salt	NON_TF
#A69363	AT1G50460	Salt	NON_TF
#A69363	AT1G17550	Salt	NON_TF
#A69363	AT3G58120	Salt	TF
#A69363	AT4G35320	Salt	NON_TF
#A69363	AT5G54910	Salt	NON_TF
#A69363	AT3G13800	Salt	NON_TF
#A69363	AT1G16130	Salt	NON_TF
#A69363	AT3G55850	Salt	NON_TF
#A69363	AT3G45740	Salt	NON_TF
#A69363	AT5G53540	Salt	NON_TF
#A69363	AT1G77340	Salt	NON_TF
#A69363	AT3G13050	Salt	NON_TF
#A69363	AT4G00720	Salt	NON_TF
#A69363	AT1G58470	Salt	NON_TF
#A69363	AT1G57700	Salt	NON_TF
#A69363	AT1G19980	Salt	NON_TF
#A69363	AT5G52620	Salt	NON_TF
#A69363	AT1G21610	Salt	NON_TF
#A69363	AT5G18290	Salt	NON_TF
#A69363	AT5G08110	Salt	NON_TF
#A69363	AT5G61980	Salt	NON_TF
#A69363	AT2G41630	Salt	NON_TF
#A69363	AT3G55970	Salt	NON_TF
#A69363	AT5G66130	Salt	NON_TF
#A69363	AT1G14540	Salt	NON_TF
#A69363	AT1G22870	Salt	NON_TF
#A69363	AT2G18340	Salt	NON_TF
#A69363	AT3G43590	Salt	NON_TF
#A69363	AT4G19520	Salt	NON_TF
#A69363	AT4G27940	Salt	NON_TF
#A69363	AT1G43040	Salt	NON_TF
#A69363	AT5G53180	Salt	NON_TF
#A69363	AT3G01175	Salt	NON_TF
#A69363	AT2G41160	Salt	NON_TF
#A69363	AT3G59610	Salt	NON_TF
#A69363	AT3G55620	Salt	NON_TF
#A69363	AT4G36110	Salt	NON_TF
#A69363	AT4G24600	Salt	NON_TF
#A69363	AT1G25340	Salt	TF
#A69363	AT1G10170	Salt	NON_TF
#A69363	AT1G07160	Salt	NON_TF
#A69363	AT1G25540	Salt	NON_TF
#A69363	AT3G27700	Salt	TF
#A69363	AT3G49580	Salt	NON_TF
#A69363	AT3G11410	Salt	NON_TF
#A69363	AT1G10740	Salt	NON_TF
#A69363	AT4G37020	Salt	NON_TF
#A69363	AT1G17150	Salt	NON_TF
#A69363	AT4G22940	Salt	NON_TF
#A69363	AT3G04240	Salt	NON_TF
#A69363	AT4G26180	Salt	NON_TF
#A69363	AT1G51940	Salt	NON_TF
#A69363	AT5G51990	Salt	TF
#A69363	AT1G56510	Salt	NON_TF
#A69363	AT4G01575	Salt	NON_TF
#A69363	AT2G19810	Salt	TF
#A69363	AT2G31210	Salt	TF
#A69363	AT5G40330	Salt	TF
#A69363	AT3G51620	Salt	NON_TF
#A69363	AT1G74840	Salt	TF
#A69363	AT1G54360	Salt	NON_TF
#A69363	AT2G39990	Salt	NON_TF
#A69363	AT1G61840	Salt	NON_TF
#A69363	AT5G17560	Salt	NON_TF
#A69363	AT5G63310	Salt	NON_TF
#A69363	AT3G56910	Salt	NON_TF
#A69363	AT1G19360	Salt	NON_TF
#A69363	AT1G68710	Salt	NON_TF
#A69363	AT3G59670	Salt	NON_TF
#A69363	AT1G04690	Salt	NON_TF
#A69363	AT3G52840	Salt	NON_TF
#A69363	AT5G47950	Salt	NON_TF
#A69363	AT1G20370	Salt	NON_TF
#A69363	AT2G25110	Salt	NON_TF
#A69363	AT4G24180	Salt	NON_TF
#A69363	AT1G70840	Salt	NON_TF
#A69363	AT1G15690	Salt	NON_TF
#A69363	AT3G27950	Salt	NON_TF
#A69363	AT2G39810	Salt	NON_TF
#A69363	AT1G13710	Salt	NON_TF
#A69363	AT3G44590	Salt	NON_TF
#A69363	AT1G61570	Salt	NON_TF
#A69363	AT4G34960	Salt	NON_TF
#A69363	AT4G34450	Salt	NON_TF
#A69363	AT2G26900	Salt	NON_TF
#A69363	AT5G47700	Salt	NON_TF
#A69363	AT1G25230	Salt	NON_TF
#A69363	AT3G13760	Salt	NON_TF
#A69363	AT3G07030	Salt	NON_TF
#A69363	AT4G25080	Salt	NON_TF
#A69363	AT5G63870	Salt	NON_TF
#A69363	AT2G32950	Salt	NON_TF
#A69363	AT2G01900	Salt	NON_TF
#A69363	AT4G31400	Salt	NON_TF
#A69363	AT2G18030	Salt	NON_TF
#A69363	AT5G43010	Salt	NON_TF
#A69363	AT4G39350	Salt	NON_TF
#A69363	AT2G04030	Salt	NON_TF
#A69363	AT3G22230	Salt	NON_TF
#A69363	AT2G39570	Salt	NON_TF
#A69363	AT2G40570	Salt	NON_TF
#A69363	AT1G80050	Salt	NON_TF
#A69363	AT3G49470	Salt	NON_TF
#A69363	AT2G22230	Salt	NON_TF
#A69363	AT4G01930	Salt	NON_TF
#A69363	AT1G49400	Salt	NON_TF
#A69363	AT5G26670	Salt	NON_TF
#A69363	AT2G45180	Salt	NON_TF
#A69363	AT4G31310	Salt	NON_TF
#A69363	AT5G04950	Salt	NON_TF
#A69363	AT3G16780	Salt	NON_TF
#A69363	AT1G15200	Salt	NON_TF
#A69363	AT1G72410	Salt	NON_TF
#A69363	AT1G47200	Salt	NON_TF
#A69363	AT1G16740	Salt	NON_TF
#A69363	AT2G40150	Salt	NON_TF
#A69363	AT1G63980	Salt	NON_TF
#A69363	AT2G16750	Salt	NON_TF
#A69363	AT5G04160	Salt	NON_TF
#A69363	AT4G35570	Salt	TF
#A69363	AT1G80600	Salt	NON_TF
#A69363	AT5G53370	Salt	NON_TF
#A69363	AT1G49500	Salt	NON_TF
#A69363	AT3G06610	Salt	NON_TF
#A69363	AT2G20515	Salt	NON_TF
#A69363	AT2G03680	Salt	NON_TF
#A69363	AT1G15930	Salt	NON_TF
#A69363	AT2G40490	Salt	NON_TF
#A69363	AT4G21110	Salt	NON_TF
#A69363	AT5G55530	Salt	NON_TF
#A69363	AT2G32280	Salt	NON_TF
#A69363	AT5G62980	Salt	NON_TF
#A69363	AT5G58710	Salt	NON_TF
#A69363	AT4G01320	Salt	NON_TF
#A69363	AT4G33740	Salt	NON_TF
#A69363	AT2G15240	Salt	NON_TF
#A69363	AT2G38800	Salt	NON_TF
#A69363	AT2G16600	Salt	NON_TF
#A69363	AT4G21150	Salt	NON_TF
#A69363	AT5G12150	Salt	NON_TF
#A69363	AT4G38220	Salt	NON_TF
#A69363	AT1G14220	Salt	NON_TF
#A69363	AT1G08560	Salt	NON_TF
#A69363	AT5G18670	Salt	NON_TF
#A69363	AT4G02500	Salt	NON_TF
#A69363	AT4G09830	Salt	NON_TF
#A69363	AT5G05990	Salt	NON_TF
#A69363	AT3G15353	Salt	NON_TF
#A69363	AT3G05560	Salt	NON_TF
#A69363	AT4G30010	Salt	NON_TF
#A69363	AT5G02280	Salt	NON_TF
#A69363	AT5G51940	Salt	NON_TF
#A69363	AT1G16240	Salt	NON_TF
#A69363	AT3G18210	Salt	NON_TF
#A69363	AT5G61780	Salt	NON_TF
#A69363	AT2G04280	Salt	NON_TF
#A69363	AT5G52180	Salt	NON_TF
#A69363	AT5G13050	Salt	NON_TF
#A69363	AT1G67750	Salt	NON_TF
#A69363	AT1G19520	Salt	NON_TF
#A69363	AT4G02580	Salt	NON_TF
#A69363	AT5G24400	Salt	NON_TF
#A69363	AT4G33400	Salt	NON_TF
#A69363	AT5G38480	Salt	NON_TF
#A69363	AT1G50900	Salt	NON_TF
#A69363	AT3G47836	Salt	NON_TF
#A69363	AT1G73230	Salt	NON_TF
#A69363	AT5G13980	Salt	NON_TF
#A69363	AT2G46390	Salt	NON_TF
#A69363	AT1G72820	Salt	NON_TF
#A69363	AT1G50660	Salt	NON_TF
#A69363	AT5G19570	Salt	NON_TF
#A69363	AT1G03010	Salt	NON_TF
#A69363	AT3G46010	Salt	NON_TF
#A69363	AT4G18510	Salt	NON_TF
#A69363	AT1G49600	Salt	NON_TF
#A69363	AT2G34585	Salt	NON_TF
#A69363	AT5G67090	Salt	NON_TF
#A69363	AT2G17390	Salt	NON_TF
#A69363	AT5G20950	Salt	NON_TF
#A69363	AT4G26660	Salt	NON_TF
#A69363	AT1G31830	Salt	NON_TF
#A69363	AT1G18370	Salt	NON_TF
#A69363	AT4G08300	Salt	NON_TF
#A69363	AT1G07210	Salt	NON_TF
#A69363	AT4G02400	Salt	NON_TF
#A69363	AT1G31710	Salt	NON_TF
#A69363	AT3G56070	Salt	NON_TF
#A69363	AT2G17930	Salt	NON_TF
#A69363	AT2G38130	Salt	TF
#A69363	AT3G56480	Salt	NON_TF
#A69363	AT2G45730	Salt	NON_TF
#A69363	AT1G73780	Salt	NON_TF
#A69363	AT5G05170	Salt	NON_TF
#A69363	AT3G49750	Salt	NON_TF
#A69363	AT5G60920	Salt	NON_TF
#A69363	AT5G11490	Salt	NON_TF
#A69363	AT5G04820	Salt	TF
#A69363	AT5G48760	Salt	NON_TF
#A69363	AT1G34210	Salt	NON_TF
#A69363	AT5G17160	Salt	NON_TF
#A69363	AT3G12290	Salt	NON_TF
#A69363	AT1G61150	Salt	NON_TF
#A69363	AT1G12370	Salt	NON_TF
#A69363	AT5G18800	Salt	NON_TF
#A69363	AT5G60670	Salt	NON_TF
#A69363	AT5G09810	Salt	NON_TF
#A69363	AT3G05675	Salt	NON_TF
#A69363	AT5G40580	Salt	NON_TF
#A69363	AT2G23310	Salt	NON_TF
#A69363	AT3G63410	Salt	NON_TF
#A69363	AT2G45540	Salt	NON_TF
#A69363	AT3G03380	Salt	NON_TF
#A69363	AT5G65430	Salt	NON_TF
#A69363	AT3G27430	Salt	NON_TF
#A69363	AT3G25220	Salt	NON_TF
#A69363	AT2G43200	Salt	NON_TF
#A69363	AT2G01735	Salt	NON_TF
#A69363	AT4G30800	Salt	NON_TF
#A69363	AT5G64350	Salt	NON_TF
#A69363	AT3G50000	Salt	NON_TF
#A69363	AT1G79830	Salt	NON_TF
#A69363	AT2G47980	Salt	NON_TF
#A69363	AT1G48330	Salt	NON_TF
#A69363	AT3G50630	Salt	NON_TF
#A69363	AT3G07510	Salt	NON_TF
#A69363	AT4G20280	Salt	NON_TF
#A69363	AT1G54730	Salt	NON_TF
#A69363	AT4G29430	Salt	NON_TF
#A69363	AT4G24670	Salt	NON_TF
#A69363	AT2G15290	Salt	NON_TF
#A69363	AT1G54920	Salt	NON_TF
#A69363	AT2G44065	Salt	NON_TF
#A69363	AT2G01250	Salt	NON_TF
#A69363	AT3G51800	Salt	NON_TF
#A69363	AT2G19720	Salt	NON_TF
#A69363	AT1G06110	Salt	NON_TF
#A69363	AT1G11240	Salt	NON_TF
#A69363	AT2G41620	Salt	NON_TF
#A69363	AT1G08360	Salt	NON_TF
#A69363	AT5G49980	Salt	NON_TF
#A69363	AT3G51290	Salt	NON_TF
#A69363	AT5G62440	Salt	NON_TF
#A69363	AT3G55030	Salt	NON_TF
#A69363	AT1G26550	Salt	NON_TF
#A69363	AT4G32520	Salt	NON_TF
[truncated: 3,050 more rows]

## Sheet: Root Drought salt CERN
color	name	Net	TF
#1E6B52	AT3G47500	Drought	TF
#1E6B52	AT5G58870	Drought	NON_TF
#1E6B52	AT1G18460	Drought	NON_TF
#1E6B52	AT2G31380	Drought	TF
#1E6B52	AT3G12320	Drought	NON_TF
#1E6B52	AT4G14900	Drought	NON_TF
#1E6B52	AT5G48900	Drought	NON_TF
#1E6B52	AT1G04250	Drought	TF
#1E6B52	AT5G64780	Drought	NON_TF
#FFD602	AT1G73870	Drought and Salt	TF
#1E6B52	AT5G13630	Drought	NON_TF
#1E6B52	AT4G35250	Drought	NON_TF
#1E6B52	AT5G13180	Drought	TF
#FFD602	AT2G45190	Drought and Salt	TF
#FFD602	AT3G50750	Drought and Salt	TF
#1E6B52	AT1G62510	Drought	NON_TF
#1E6B52	AT3G10420	Drought	NON_TF
#A69363	AT1G64355	Salt	NON_TF
#A69363	AT3G24430	Salt	NON_TF
#FFD602	AT2G46270	Drought and Salt	TF
#1E6B52	AT1G22510	Drought	NON_TF
#FFD602	AT5G52660	Drought and Salt	TF
#1E6B52	AT5G14700	Drought	NON_TF
#1E6B52	AT1G56600	Drought	NON_TF
#1E6B52	AT2G25490	Drought	NON_TF
#1E6B52	AT2G22880	Drought	NON_TF
#1E6B52	AT4G29950	Drought	NON_TF
#1E6B52	AT5G40390	Drought	NON_TF
#1E6B52	AT1G78070	Drought	NON_TF
#1E6B52	AT4G35550	Drought	TF
#FFD602	AT5G59220	Drought and Salt	NON_TF
#1E6B52	AT2G03240	Drought	NON_TF
#1E6B52	AT5G12940	Drought	NON_TF
#1E6B52	AT5G54470	Drought	TF
#1E6B52	AT2G40230	Drought	NON_TF
#1E6B52	AT1G61890	Drought	NON_TF
#1E6B52	AT1G24140	Drought	NON_TF
#1E6B52	AT2G35710	Drought	NON_TF
#1E6B52	AT3G27270	Drought	NON_TF
#1E6B52	AT5G54300	Drought	NON_TF
#1E6B52	AT1G09350	Drought	NON_TF
#1E6B52	AT2G27690	Drought	NON_TF
#1E6B52	AT4G36500	Drought	NON_TF
#1E6B52	AT1G20070	Drought	NON_TF
#1E6B52	AT2G22010	Drought	NON_TF
#1E6B52	AT1G18890	Drought	NON_TF
#1E6B52	AT5G22250	Drought	NON_TF
#1E6B52	AT5G62070	Drought	NON_TF
#1E6B52	AT5G25440	Drought	NON_TF
#1E6B52	AT1G21380	Drought	NON_TF
#1E6B52	AT4G23630	Drought	NON_TF
#1E6B52	AT5G66650	Drought	NON_TF
#1E6B52	AT2G32800	Drought	NON_TF
#1E6B52	AT3G50930	Drought	NON_TF
#1E6B52	AT2G20370	Drought	NON_TF
#1E6B52	AT4G17550	Drought	NON_TF
#1E6B52	AT5G41900	Drought	NON_TF
#1E6B52	AT4G38810	Drought	NON_TF
#1E6B52	AT5G42050	Drought	NON_TF
#1E6B52	AT3G50760	Drought	NON_TF
#1E6B52	AT4G00360	Drought	NON_TF
#FFD602	AT1G19020	Drought and Salt	NON_TF
#1E6B52	AT5G08130	Drought	TF
#1E6B52	AT5G66210	Drought	NON_TF
#1E6B52	AT5G65300	Drought	NON_TF
#1E6B52	AT2G30360	Drought	NON_TF
#1E6B52	AT2G46370	Drought	NON_TF
#1E6B52	AT1G64380	Drought	TF
#1E6B52	AT5G58160	Drought	NON_TF
#1E6B52	AT1G05170	Drought	NON_TF
#FFD602	AT3G57540	Drought and Salt	NON_TF
#FFD602	AT1G52890	Drought and Salt	TF
#1E6B52	AT2G02860	Drought	NON_TF
#FFD602	AT1G69260	Drought and Salt	NON_TF
#FFD602	AT4G24960	Drought and Salt	NON_TF
#1E6B52	AT4G34410	Drought	TF
#1E6B52	AT3G21220	Drought	NON_TF
#1E6B52	AT5G49520	Drought	TF
#1E6B52	AT1G61340	Drought	NON_TF
#1E6B52	AT1G69840	Drought	NON_TF
#1E6B52	AT1G19180	Drought	TF
#1E6B52	AT1G74950	Drought	TF
#1E6B52	AT4G15480	Drought	NON_TF
#1E6B52	AT4G30430	Drought	NON_TF
#1E6B52	AT5G22630	Drought	NON_TF
#1E6B52	AT5G41600	Drought	NON_TF
#1E6B52	AT3G46450	Drought	NON_TF
#1E6B52	AT3G50260	Drought	TF
#1E6B52	AT1G77280	Drought	NON_TF
#1E6B52	AT4G18170	Drought	TF
#1E6B52	AT2G44970	Drought	NON_TF
#1E6B52	AT2G39250	Drought	TF
#1E6B52	AT4G30470	Drought	NON_TF
#FFD602	AT5G45280	Drought and Salt	NON_TF
#1E6B52	AT5G60790	Drought	NON_TF
#FFD602	AT4G05020	Drought and Salt	NON_TF
#FFD602	AT4G28140	Drought and Salt	TF
#1E6B52	AT5G01730	Drought	NON_TF
#1E6B52	AT4G36010	Drought	NON_TF
#1E6B52	AT1G20450	Drought	NON_TF
#1E6B52	AT4G18010	Drought	NON_TF
#FFD602	AT5G67300	Drought and Salt	TF
#1E6B52	AT3G48090	Drought	NON_TF
#1E6B52	AT5G11650	Drought	NON_TF
#1E6B52	AT1G19970	Drought	NON_TF
#1E6B52	AT4G17230	Drought	TF
#1E6B52	AT1G20823	Drought	NON_TF
#1E6B52	AT3G44720	Drought	NON_TF
#1E6B52	AT4G11330	Drought	NON_TF
#1E6B52	AT3G21890	Drought	TF
#1E6B52	AT3G25780	Drought	NON_TF
#1E6B52	AT4G30340	Drought	NON_TF
#1E6B52	AT4G39830	Drought	NON_TF
#1E6B52	AT1G08050	Drought	NON_TF
#1E6B52	AT2G41900	Drought	TF
#1E6B52	AT1G74430	Drought	TF
#1E6B52	AT1G20510	Drought	NON_TF
#1E6B52	AT5G19875	Drought	NON_TF
#1E6B52	AT4G23220	Drought	NON_TF
#1E6B52	AT3G11420	Drought	NON_TF
#1E6B52	AT2G44840	Drought	TF
#1E6B52	AT3G51890	Drought	NON_TF
#FFD602	AT3G29575	Drought and Salt	NON_TF
#1E6B52	AT4G34390	Drought	NON_TF
#1E6B52	AT4G00570	Drought	NON_TF
#1E6B52	AT5G57050	Drought	NON_TF
#1E6B52	AT1G27760	Drought	NON_TF
#1E6B52	AT5G48655	Drought	NON_TF
#1E6B52	AT3G52400	Drought	NON_TF
#1E6B52	AT1G08860	Drought	NON_TF
#1E6B52	AT2G25460	Drought	NON_TF
#1E6B52	AT2G32930	Drought	TF
#1E6B52	AT3G54950	Drought	NON_TF
#1E6B52	AT2G22500	Drought	NON_TF
#1E6B52	AT4G27520	Drought	NON_TF
#A69363	AT1G60190	Salt	NON_TF
#A69363	AT3G14067	Salt	NON_TF
#A69363	AT2G41870	Salt	NON_TF
#A69363	AT5G49120	Salt	NON_TF
#FFD602	AT5G66460	Drought and Salt	NON_TF
#A69363	AT1G30500	Salt	TF
#A69363	AT2G45600	Salt	NON_TF
#A69363	AT1G49450	Salt	NON_TF
#1E6B52	AT1G30210	Drought	TF
#1E6B52	AT4G33540	Drought	NON_TF
#FFD602	AT4G01130	Drought and Salt	NON_TF
#1E6B52	AT3G12290	Drought	NON_TF
#1E6B52	AT3G14310	Drought	NON_TF
#1E6B52	AT3G26740	Drought	NON_TF
#FFD602	AT5G64860	Drought and Salt	NON_TF
#1E6B52	AT4G09020	Drought	NON_TF
#1E6B52	AT2G31040	Drought	NON_TF
#1E6B52	AT3G62550	Drought	NON_TF
#FFD602	AT2G33630	Drought and Salt	NON_TF
#1E6B52	AT2G42520	Drought	NON_TF
#1E6B52	AT1G80480	Drought	NON_TF
#1E6B52	AT1G71800	Drought	NON_TF
#1E6B52	AT5G13730	Drought	TF
#1E6B52	AT2G41705	Drought	NON_TF
#1E6B52	AT3G52180	Drought	NON_TF
#FFD602	AT1G72520	Drought and Salt	NON_TF
#1E6B52	AT1G51660	Drought	NON_TF
#1E6B52	AT5G25930	Drought	NON_TF
#1E6B52	AT5G27420	Drought	NON_TF
#1E6B52	AT4G23810	Drought	TF
#FFD602	AT1G55450	Drought and Salt	NON_TF
#1E6B52	AT5G13190	Drought	NON_TF
#1E6B52	AT5G12340	Drought	NON_TF
#1E6B52	AT1G07630	Drought	NON_TF
#1E6B52	AT4G21390	Drought	NON_TF
#1E6B52	AT2G26530	Drought	NON_TF
#1E6B52	AT2G43320	Drought	NON_TF
#1E6B52	AT1G42990	Drought	TF
#1E6B52	AT1G28380	Drought	NON_TF
#1E6B52	AT3G53810	Drought	NON_TF
#1E6B52	AT5G52050	Drought	NON_TF
#1E6B52	AT1G20310	Drought	NON_TF
#1E6B52	AT1G29690	Drought	NON_TF
#1E6B52	AT3G02840	Drought	NON_TF
#1E6B52	AT3G08720	Drought	NON_TF
#1E6B52	AT1G14540	Drought	NON_TF
#1E6B52	AT5G04870	Drought	NON_TF
#1E6B52	AT3G49350	Drought	NON_TF
#1E6B52	AT1G66160	Drought	NON_TF
#1E6B52	AT3G11820	Drought	NON_TF
#FFD602	AT2G24600	Drought and Salt	NON_TF
#1E6B52	AT4G27720	Drought	NON_TF
#1E6B52	AT2G33580	Drought	NON_TF
#FFD602	AT4G02380	Drought and Salt	NON_TF
#1E6B52	AT5G42380	Drought	NON_TF
#1E6B52	AT5G48530	Drought	NON_TF
#FFD602	AT5G17300	Drought and Salt	TF
#1E6B52	AT1G64530	Drought	TF
#1E6B52	AT1G44000	Drought	NON_TF
#FFD602	AT4G15430	Drought and Salt	NON_TF
#1E6B52	AT1G26560	Drought	NON_TF
#1E6B52	AT2G41250	Drought	NON_TF
#1E6B52	AT1G66330	Drought	NON_TF
#FFD602	AT3G17330	Drought and Salt	NON_TF
#FFD602	AT3G57040	Drought and Salt	TF
#1E6B52	AT1G70940	Drought	NON_TF
#1E6B52	AT3G18750	Drought	NON_TF
#1E6B52	AT3G01060	Drought	NON_TF
#FFD602	AT3G02380	Drought and Salt	TF
#FFD602	AT1G55960	Drought and Salt	NON_TF
#FFD602	AT2G03730	Drought and Salt	NON_TF
#1E6B52	AT3G24460	Drought	NON_TF
#1E6B52	AT3G21390	Drought	NON_TF
#FFD602	AT1G76990	Drought and Salt	NON_TF
#1E6B52	AT4G07960	Drought	NON_TF
#1E6B52	AT2G41290	Drought	NON_TF
#1E6B52	AT5G01030	Drought	NON_TF
#1E6B52	AT4G32190	Drought	NON_TF
#1E6B52	AT1G67120	Drought	NON_TF
#1E6B52	AT3G22530	Drought	NON_TF
#1E6B52	AT1G49780	Drought	NON_TF
#1E6B52	AT2G26800	Drought	NON_TF
#FFD602	AT2G37460	Drought and Salt	NON_TF
#1E6B52	AT1G62250	Drought	NON_TF
#1E6B52	AT4G08930	Drought	NON_TF
#FFD602	AT3G55960	Drought and Salt	NON_TF
#1E6B52	AT2G24100	Drought	NON_TF
#FFD602	AT1G01060	Drought and Salt	TF
#1E6B52	AT1G21050	Drought	NON_TF
#1E6B52	AT1G75100	Drought	NON_TF
#1E6B52	AT2G21050	Drought	NON_TF
#A69363	AT2G40400	Salt	NON_TF
#FFD602	AT3G57550	Drought and Salt	NON_TF
#A69363	AT3G49160	Salt	NON_TF
#A69363	AT4G38680	Salt	TF
#A69363	AT3G07565	Salt	NON_TF
#A69363	AT3G13065	Salt	NON_TF
#FFD602	AT4G39770	Drought and Salt	NON_TF
#FFD602	AT4G02200	Drought and Salt	NON_TF
#A69363	AT4G17870	Salt	NON_TF
#A69363	AT1G55805	Salt	NON_TF
#A69363	AT1G32530	Salt	NON_TF
#A69363	AT2G33310	Salt	TF
#FFD602	AT1G21140	Drought and Salt	NON_TF
#A69363	AT3G51870	Salt	NON_TF
#A69363	AT2G27710	Salt	NON_TF
#A69363	AT2G06850	Salt	NON_TF
#A69363	AT1G32460	Salt	NON_TF
#FFD602	AT1G65870	Drought and Salt	NON_TF
#A69363	AT5G44020	Salt	NON_TF
#A69363	AT1G70410	Salt	NON_TF
#A69363	AT5G18650	Salt	NON_TF
#FFD602	AT1G49840	Drought and Salt	NON_TF
#A69363	AT5G20250	Salt	NON_TF
#FFD602	AT1G19450	Drought and Salt	NON_TF
#FFD602	AT1G29660	Drought and Salt	NON_TF
#A69363	AT2G04795	Salt	NON_TF
#A69363	AT3G06750	Salt	NON_TF
#FFD602	AT3G13750	Drought and Salt	NON_TF
#FFD602	AT3G19450	Drought and Salt	NON_TF
#FFD602	AT3G54510	Drought and Salt	NON_TF
#FFD602	AT5G15830	Drought and Salt	TF
#A69363	AT1G02640	Salt	NON_TF
#A69363	AT1G60010	Salt	NON_TF
#A69363	AT5G43320	Salt	NON_TF
#A69363	AT3G13000	Salt	NON_TF
#A69363	AT1G12500	Salt	NON_TF
#FFD602	AT3G13062	Drought and Salt	NON_TF
#FFD602	AT3G15850	Drought and Salt	NON_TF
#FFD602	AT1G33240	Drought and Salt	TF
#FFD602	AT3G50560	Drought and Salt	NON_TF
#FFD602	AT3G45730	Drought and Salt	NON_TF
#A69363	AT3G14770	Salt	NON_TF
#A69363	AT5G13100	Salt	NON_TF
#A69363	AT1G16390	Salt	NON_TF
#A69363	AT2G10940	Salt	NON_TF
#A69363	AT5G57020	Salt	NON_TF
#A69363	AT5G04230	Salt	NON_TF
#FFD602	AT1G07570	Drought and Salt	NON_TF
#A69363	AT4G19160	Salt	NON_TF
#A69363	AT5G15210	Salt	TF
#A69363	AT5G56870	Salt	NON_TF
#A69363	AT1G61900	Salt	NON_TF
#FFD602	AT3G48560	Drought and Salt	NON_TF
#A69363	AT4G25050	Salt	NON_TF
#A69363	AT2G30520	Salt	NON_TF
#A69363	AT2G38310	Salt	NON_TF
#A69363	AT3G53260	Salt	NON_TF
#A69363	AT4G30110	Salt	NON_TF
#A69363	AT1G10470	Salt	TF
#1E6B52	AT1G76040	Drought	NON_TF
#1E6B52	AT3G44400	Drought	NON_TF
#1E6B52	AT2G22080	Drought	NON_TF
#1E6B52	AT4G21940	Drought	NON_TF
#1E6B52	AT2G30250	Drought	TF
#1E6B52	AT3G60260	Drought	NON_TF
#1E6B52	AT1G14370	Drought	NON_TF
#1E6B52	AT3G54200	Drought	NON_TF
#1E6B52	AT1G61610	Drought	NON_TF
#1E6B52	AT5G07070	Drought	NON_TF
#1E6B52	AT1G61800	Drought	NON_TF
#1E6B52	AT2G46940	Drought	NON_TF
#1E6B52	AT4G23190	Drought	NON_TF
#1E6B52	AT5G66640	Drought	NON_TF
#1E6B52	AT2G29440	Drought	NON_TF
#1E6B52	AT4G12000	Drought	NON_TF
#1E6B52	AT4G30290	Drought	NON_TF
#1E6B52	AT1G17420	Drought	NON_TF
#1E6B52	AT5G52750	Drought	NON_TF
#1E6B52	AT1G80840	Drought	TF
#1E6B52	AT4G35110	Drought	NON_TF
#1E6B52	AT4G12040	Drought	NON_TF
#1E6B52	AT5G26030	Drought	NON_TF
#1E6B52	AT1G17380	Drought	TF
#1E6B52	AT5G53050	Drought	NON_TF
#1E6B52	AT4G14365	Drought	NON_TF
#FFD602	AT1G72450	Drought and Salt	TF
#1E6B52	AT5G46410	Drought	NON_TF
#1E6B52	AT1G33260	Drought	NON_TF
#1E6B52	AT2G16900	Drought	NON_TF
#1E6B52	AT3G05640	Drought	NON_TF
#1E6B52	AT3G04630	Drought	NON_TF
#1E6B52	AT5G24030	Drought	NON_TF
#1E6B52	AT2G06050	Drought	NON_TF
#1E6B52	AT3G26980	Drought	NON_TF
#1E6B52	AT3G16860	Drought	NON_TF
#1E6B52	AT4G30996	Drought	NON_TF
#1E6B52	AT2G01450	Drought	NON_TF
#1E6B52	AT5G01540	Drought	NON_TF
#FFD602	AT1G70700	Drought and Salt	TF
#1E6B52	AT4G12410	Drought	NON_TF
#1E6B52	AT2G44500	Drought	NON_TF
#1E6B52	AT1G50640	Drought	TF
#1E6B52	AT5G48450	Drought	NON_TF
#1E6B52	AT5G03720	Drought	TF
#1E6B52	AT5G52310	Drought	NON_TF
#1E6B52	AT5G59730	Drought	NON_TF
#1E6B52	AT5G53760	Drought	NON_TF
#1E6B52	AT1G71697	Drought	NON_TF
#1E6B52	AT4G22780	Drought	NON_TF
#1E6B52	AT4G20880	Drought	NON_TF
#1E6B52	AT1G32640	Drought	TF
#1E6B52	AT3G06150	Drought	NON_TF
#1E6B52	AT3G55430	Drought	NON_TF
#1E6B52	AT4G30210	Drought	NON_TF
#1E6B52	AT4G30280	Drought	NON_TF
#1E6B52	AT4G30600	Drought	NON_TF
#1E6B52	AT1G42470	Drought	NON_TF
#1E6B52	AT3G09830	Drought	NON_TF
#A69363	AT1G62290	Salt	NON_TF
#A69363	AT1G54100	Salt	NON_TF
#A69363	AT1G41830	Salt	NON_TF
#A69363	AT3G43270	Salt	NON_TF
#A69363	AT1G56700	Salt	NON_TF
#A69363	AT5G52280	Salt	NON_TF
#A69363	AT1G47128	Salt	NON_TF
#A69363	AT1G76670	Salt	NON_TF
#A69363	AT1G54050	Salt	NON_TF
#FFD602	AT4G11220	Drought and Salt	NON_TF
#FFD602	AT4G34590	Drought and Salt	TF
#1E6B52	AT4G36910	Drought	NON_TF
#1E6B52	AT1G79410	Drought	NON_TF
#1E6B52	AT4G30890	Drought	NON_TF
#1E6B52	AT1G53280	Drought	NON_TF
#1E6B52	AT1G79110	Drought	NON_TF
#1E6B52	AT4G17090	Drought	NON_TF
#A69363	AT5G62530	Salt	NON_TF
#A69363	AT2G42490	Salt	NON_TF
#A69363	AT1G80130	Salt	NON_TF
#A69363	AT1G62045	Salt	NON_TF
#A69363	AT3G09820	Salt	NON_TF
#A69363	AT1G70780	Salt	NON_TF
#A69363	AT3G21190	Salt	NON_TF
#A69363	AT5G10550	Salt	NON_TF
#A69363	AT1G75760	Salt	NON_TF
#A69363	AT3G16330	Salt	NON_TF
#A69363	AT1G71840	Salt	NON_TF
#A69363	AT5G29000	Salt	TF
#A69363	AT3G16050	Salt	NON_TF
#A69363	AT1G19710	Salt	NON_TF
#A69363	AT5G42570	Salt	NON_TF
#FFD602	AT3G29360	Drought and Salt	NON_TF
#A69363	AT5G53820	Salt	NON_TF
#A69363	AT5G25240	Salt	NON_TF
#A69363	AT5G04410	Salt	TF
#A69363	AT3G06860	Salt	NON_TF
#1E6B52	AT4G17490	Drought	TF
#1E6B52	AT5G42940	Drought	NON_TF
#1E6B52	AT3G19130	Drought	NON_TF
#FFD602	AT1G19380	Drought and Salt	NON_TF
#1E6B52	AT4G24570	Drought	NON_TF
#1E6B52	AT3G25600	Drought	NON_TF
#1E6B52	AT4G02330	Drought	NON_TF
#1E6B52	AT2G27080	Drought	NON_TF
#1E6B52	AT2G41640	Drought	NON_TF
#1E6B52	AT2G39650	Drought	NON_TF
#1E6B52	AT5G59820	Drought	TF
#1E6B52	AT4G34150	Drought	NON_TF
#1E6B52	AT3G22160	Drought	NON_TF
#1E6B52	AT1G74450	Drought	NON_TF
#FFD602	AT5G04340	Drought and Salt	TF
#1E6B52	AT4G24110	Drought	NON_TF
#1E6B52	AT3G52800	Drought	NON_TF
#1E6B52	AT3G46620	Drought	NON_TF
#1E6B52	AT1G27730	Drought	TF
#1E6B52	AT4G27350	Drought	NON_TF
#1E6B52	AT2G40140	Drought	TF
#1E6B52	AT4G29780	Drought	NON_TF
#FFD602	AT5G16820	Drought and Salt	TF
#FFD602	AT4G14270	Drought and Salt	NON_TF
#1E6B52	AT2G22660	Drought	NON_TF
#1E6B52	AT2G20740	Drought	NON_TF
#1E6B52	AT3G56720	Drought	NON_TF
#1E6B52	AT3G57050	Drought	NON_TF
#1E6B52	AT2G21240	Drought	TF
#1E6B52	AT1G79500	Drought	NON_TF
#1E6B52	AT4G33090	Drought	NON_TF
#1E6B52	AT3G60130	Drought	NON_TF
#1E6B52	AT2G29020	Drought	NON_TF
#1E6B52	AT4G34030	Drought	NON_TF
#1E6B52	AT1G69830	Drought	NON_TF
#1E6B52	AT5G47020	Drought	NON_TF
#1E6B52	AT1G05380	Drought	TF
#1E6B52	AT2G27200	Drought	NON_TF
#1E6B52	AT2G39900	Drought	TF
#1E6B52	AT1G74410	Drought	NON_TF
#1E6B52	AT3G45770	Drought	NON_TF
#1E6B52	AT4G22540	Drought	NON_TF
#1E6B52	AT5G49555	Drought	NON_TF
#1E6B52	AT2G07180	Drought	NON_TF
#FFD602	AT4G02370	Drought and Salt	NON_TF
#1E6B52	AT4G29010	Drought	NON_TF
#1E6B52	AT1G61670	Drought	NON_TF
#1E6B52	AT1G73980	Drought	NON_TF
#1E6B52	AT1G76150	Drought	NON_TF
#1E6B52	AT5G57655	Drought	NON_TF
#1E6B52	AT3G17020	Drought	NON_TF
#1E6B52	AT2G39920	Drought	NON_TF
#1E6B52	AT5G61530	Drought	NON_TF
#1E6B52	AT1G02305	Drought	NON_TF
#1E6B52	AT5G10790	Drought	NON_TF
#1E6B52	AT2G45560	Drought	NON_TF
#1E6B52	AT1G12845	Drought	NON_TF
#1E6B52	AT3G59820	Drought	NON_TF
#1E6B52	AT5G61040	Drought	NON_TF
#1E6B52	AT1G72340	Drought	NON_TF
#1E6B52	AT5G27380	Drought	NON_TF
#1E6B52	AT2G31800	Drought	NON_TF
#1E6B52	AT2G02570	Drought	NON_TF
#1E6B52	AT2G02760	Drought	NON_TF
#1E6B52	AT4G33490	Drought	NON_TF
#FFD602	AT4G33670	Drought and Salt	NON_TF
#1E6B52	AT3G06483	Drought	NON_TF
#1E6B52	AT1G50940	Drought	NON_TF
#1E6B52	AT5G45610	Drought	NON_TF
#1E6B52	AT1G05805	Drought	TF
#1E6B52	AT5G55230	Drought	NON_TF
#1E6B52	AT4G17150	Drought	NON_TF
#1E6B52	AT1G51940	Drought	NON_TF
#1E6B52	AT5G66880	Drought	NON_TF
#1E6B52	AT1G51610	Drought	NON_TF
#1E6B52	AT1G77000	Drought	NON_TF
#1E6B52	AT5G65760	Drought	NON_TF
#1E6B52	AT1G48790	Drought	NON_TF
#1E6B52	AT1G75190	Drought	NON_TF
#1E6B52	AT1G13990	Drought	NON_TF
#1E6B52	AT5G06690	Drought	NON_TF
#1E6B52	AT5G27280	Drought	NON_TF
#1E6B52	AT2G39930	Drought	NON_TF
#1E6B52	AT5G59250	Drought	NON_TF
#1E6B52	AT1G69390	Drought	NON_TF
#1E6B52	AT2G33150	Drought	NON_TF
#1E6B52	AT2G21430	Drought	NON_TF
#1E6B52	AT1G02260	Drought	NON_TF
#1E6B52	AT5G43440	Drought	NON_TF
#1E6B52	AT3G50500	Drought	NON_TF
#1E6B52	AT2G15960	Drought	NON_TF
#1E6B52	AT2G46240	Drought	NON_TF
#FFD602	AT1G10760	Drought and Salt	NON_TF
#1E6B52	AT4G36630	Drought	NON_TF
#FFD602	AT1G49720	Drought and Salt	TF
#1E6B52	AT2G14170	Drought	NON_TF
#1E6B52	AT5G19330	Drought	TF
#1E6B52	AT3G19640	Drought	NON_TF
#1E6B52	AT3G19553	Drought	NON_TF
#1E6B52	AT3G22740	Drought	NON_TF
#1E6B52	AT1G22620	Drought	NON_TF
#1E6B52	AT4G17100	Drought	NON_TF
#FFD602	AT5G27930	Drought and Salt	NON_TF
#1E6B52	AT1G68820	Drought	NON_TF
#A69363	AT1G51890	Salt	NON_TF
#A69363	AT5G57630	Salt	NON_TF
#1E6B52	AT3G23250	Drought	TF
#1E6B52	AT5G54170	Drought	NON_TF
#FFD602	AT3G01830	Drought and Salt	NON_TF
#1E6B52	AT3G55500	Drought	NON_TF
#1E6B52	AT1G65390	Drought	NON_TF
#1E6B52	AT4G20860	Drought	NON_TF
#1E6B52	AT4G31550	Drought	TF
#1E6B52	AT3G48720	Drought	NON_TF
#1E6B52	AT3G50910	Drought	NON_TF
#1E6B52	AT4G25390	Drought	NON_TF
#1E6B52	AT1G07720	Drought	NON_TF
#1E6B52	AT3G63010	Drought	NON_TF
#1E6B52	AT1G69010	Drought	TF
#1E6B52	AT2G24540	Drought	NON_TF
#1E6B52	AT1G79270	Drought	NON_TF
#1E6B52	AT1G06570	Drought	NON_TF
#1E6B52	AT2G39450	Drought	NON_TF
#FFD602	AT5G15850	Drought and Salt	TF
#1E6B52	AT5G43150	Drought	NON_TF
#FFD602	AT5G66730	Drought and Salt	TF
#1E6B52	AT3G63120	Drought	NON_TF
#1E6B52	AT2G40890	Drought	NON_TF
#1E6B52	AT4G14350	Drought	NON_TF
#1E6B52	AT3G10050	Drought	NON_TF
#1E6B52	AT2G36870	Drought	NON_TF
#1E6B52	AT5G44670	Drought	NON_TF
#1E6B52	AT2G41040	Drought	NON_TF
#1E6B52	AT5G50100	Drought	NON_TF
#1E6B52	AT5G47560	Drought	NON_TF
#A69363	AT3G61440	Salt	NON_TF
#FFD602	AT3G24520	Drought and Salt	TF
#1E6B52	AT3G14440	Drought	NON_TF
#1E6B52	AT4G26080	Drought	NON_TF
#1E6B52	AT3G47540	Drought	NON_TF
#1E6B52	AT5G64660	Drought	NON_TF
#1E6B52	AT1G01720	Drought	TF
#1E6B52	AT1G10560	Drought	NON_TF
#1E6B52	AT1G53170	Drought	TF
#FFD602	AT4G27410	Drought and Salt	TF
#FFD602	AT1G69270	Drought and Salt	NON_TF
#1E6B52	AT1G76380	Drought	NON_TF
#1E6B52	AT1G59910	Drought	NON_TF
#1E6B52	AT3G12400	Drought	NON_TF
#1E6B52	AT3G62260	Drought	TF
#1E6B52	AT5G16200	Drought	NON_TF
#1E6B52	AT1G73805	Drought	NON_TF
#1E6B52	AT5G37540	Drought	NON_TF
#1E6B52	AT1G51700	Drought	TF
#1E6B52	AT3G57530	Drought	NON_TF
#1E6B52	AT2G41630	Drought	NON_TF
#1E6B52	AT1G30690	Drought	NON_TF
#1E6B52	AT4G37790	Drought	TF
#FFD602	AT2G23810	Drought and Salt	NON_TF
#1E6B52	AT5G04550	Drought	NON_TF
#1E6B52	AT5G62570	Drought	NON_TF
#1E6B52	AT1G12580	Drought	NON_TF
#1E6B52	AT3G56880	Drought	NON_TF
#FFD602	AT4G01950	Drought and Salt	NON_TF
#1E6B52	AT5G47960	Drought	NON_TF
#1E6B52	AT3G44260	Drought	NON_TF
#FFD602	AT5G04720	Drought and Salt	NON_TF
#1E6B52	AT1G73500	Drought	NON_TF
#1E6B52	AT3G18710	Drought	NON_TF
#1E6B52	AT5G45340	Drought	NON_TF
#1E6B52	AT5G54490	Drought	NON_TF
#1E6B52	AT1G27340	Drought	NON_TF
#1E6B52	AT1G48650	Drought	NON_TF
#1E6B52	AT1G54270	Drought	NON_TF
#1E6B52	AT3G22840	Drought	NON_TF
#1E6B52	AT4G37910	Drought	NON_TF
#1E6B52	AT1G63750	Drought	NON_TF
#1E6B52	AT4G33920	Drought	NON_TF
#1E6B52	AT1G48320	Drought	NON_TF
#1E6B52	AT1G67880	Drought	NON_TF
#1E6B52	AT5G06320	Drought	NON_TF
#1E6B52	AT3G61620	Drought	NON_TF
#1E6B52	AT1G71890	Drought	NON_TF
#1E6B52	AT5G37770	Drought	NON_TF
#1E6B52	AT2G25690	Drought	NON_TF
#FFD602	AT4G17500	Drought and Salt	TF
#1E6B52	AT4G25810	Drought	NON_TF
#1E6B52	AT4G31000	Drought	NON_TF
#1E6B52	AT5G19820	Drought	NON_TF
#1E6B52	AT5G24580	Drought	NON_TF
#1E6B52	AT5G25170	Drought	NON_TF
#1E6B52	AT4G32460	Drought	NON_TF
#1E6B52	AT3G28340	Drought	NON_TF
#1E6B52	AT5G20230	Drought	NON_TF
#1E6B52	AT3G55980	Drought	TF
#1E6B52	AT3G61640	Drought	NON_TF
#1E6B52	AT3G24530	Drought	NON_TF
#1E6B52	AT1G68410	Drought	NON_TF
#1E6B52	AT4G13050	Drought	NON_TF
#1E6B52	AT3G62720	Drought	NON_TF
#1E6B52	AT3G19380	Drought	NON_TF
#1E6B52	AT3G12910	Drought	TF
#1E6B52	AT5G13200	Drought	NON_TF
#1E6B52	AT5G52320	Drought	NON_TF
#1E6B52	AT4G12720	Drought	NON_TF
#1E6B52	AT1G09970	Drought	NON_TF
#1E6B52	AT5G12010	Drought	NON_TF
#1E6B52	AT1G01480	Drought	NON_TF
#1E6B52	AT1G80820	Drought	NON_TF
#1E6B52	AT2G28550	Drought	TF
#1E6B52	AT5G09800	Drought	NON_TF
#1E6B52	AT4G28490	Drought	NON_TF
#1E6B52	AT2G27310	Drought	NON_TF
#FFD602	AT2G28810	Drought and Salt	TF
#1E6B52	AT1G29400	Drought	NON_TF
#1E6B52	AT4G14340	Drought	NON_TF
#1E6B52	AT1G79620	Drought	NON_TF
#1E6B52	AT3G06420	Drought	NON_TF
#1E6B52	AT1G65040	Drought	NON_TF
#FFD602	AT5G17520	Drought and Salt	NON_TF
#A69363	AT2G18760	Salt	TF
#1E6B52	AT3G14340	Drought	NON_TF
#1E6B52	AT1G52880	Drought	TF
#FFD602	AT4G34000	Drought and Salt	TF
#A69363	AT2G28470	Salt	NON_TF
#A69363	AT2G24420	Salt	NON_TF
#A69363	AT5G11230	Salt	NON_TF
#A69363	AT4G35860	Salt	NON_TF
#1E6B52	AT2G46400	Drought	TF
#1E6B52	AT1G05575	Drought	NON_TF
#1E6B52	AT1G64390	Drought	NON_TF
#1E6B52	AT4G39670	Drought	NON_TF
#1E6B52	AT4G02410	Drought	NON_TF
#1E6B52	AT1G29340	Drought	NON_TF
#1E6B52	AT5G15870	Drought	NON_TF
#FFD602	AT3G50700	Drought and Salt	TF
#1E6B52	AT1G08980	Drought	NON_TF
#1E6B52	AT5G11580	Drought	NON_TF
#FFD602	AT1G66410	Drought and Salt	NON_TF
#1E6B52	AT2G21380	Drought	NON_TF
#FFD602	AT4G17140	Drought and Salt	NON_TF
#1E6B52	AT5G03050	Drought	NON_TF
#1E6B52	AT1G06460	Drought	NON_TF
#1E6B52	AT5G37780	Drought	NON_TF
#1E6B52	AT5G17190	Drought	NON_TF
#1E6B52	AT3G52070	Drought	NON_TF
#1E6B52	AT2G22980	Drought	NON_TF
#FFD602	AT2G36390	Drought and Salt	NON_TF
#1E6B52	AT5G62360	Drought	NON_TF
#1E6B52	AT2G28900	Drought	NON_TF
#1E6B52	AT3G55260	Drought	NON_TF
#1E6B52	AT4G11360	Drought	NON_TF
#1E6B52	AT2G29960	Drought	NON_TF
#1E6B52	AT3G47860	Drought	NON_TF
#1E6B52	AT3G22200	Drought	NON_TF
#FFD602	AT5G09630	Drought and Salt	NON_TF
#1E6B52	AT5G47230	Drought	TF
#1E6B52	AT5G15200	Drought	NON_TF
#1E6B52	AT3G02140	Drought	NON_TF
#1E6B52	AT3G10930	Drought	NON_TF
#1E6B52	AT5G17350	Drought	NON_TF
#1E6B52	AT3G49530	Drought	TF
#1E6B52	AT5G59450	Drought	TF
#1E6B52	AT3G54130	Drought	NON_TF
#FFD602	AT5G58430	Drought and Salt	NON_TF
#1E6B52	AT3G47080	Drought	NON_TF
#1E6B52	AT3G05200	Drought	NON_TF
#1E6B52	AT3G26910	Drought	NON_TF
#1E6B52	AT5G63130	Drought	NON_TF
#FFD602	AT2G38470	Drought and Salt	TF
#FFD602	AT5G64310	Drought and Salt	NON_TF
#1E6B52	AT5G41100	Drought	NON_TF
#1E6B52	AT1G09070	Drought	NON_TF
#1E6B52	AT5G38210	Drought	NON_TF
#FFD602	AT1G66090	Drought and Salt	NON_TF
#1E6B52	AT5G67450	Drought	TF
#FFD602	AT5G57220	Drought and Salt	NON_TF
#1E6B52	AT1G07870	Drought	NON_TF
#FFD602	AT5G47220	Drought and Salt	TF
#1E6B52	AT1G48100	Drought	NON_TF
#1E6B52	AT5G63790	Drought	TF
#1E6B52	AT3G02800	Drought	NON_TF
#1E6B52	AT1G70740	Drought	NON_TF
#1E6B52	AT2G28400	Drought	NON_TF
#1E6B52	AT5G66850	Drought	NON_TF
#1E6B52	AT1G71950	Drought	NON_TF
#1E6B52	AT1G31130	Drought	NON_TF
#1E6B52	AT1G51820	Drought	NON_TF
#1E6B52	AT3G14050	Drought	NON_TF
#1E6B52	AT4G31750	Drought	NON_TF
#1E6B52	AT2G37110	Drought	NON_TF
#1E6B52	AT1G78210	Drought	NON_TF
#1E6B52	AT1G02400	Drought	NON_TF
#1E6B52	AT2G40180	Drought	NON_TF
#1E6B52	AT1G05100	Drought	NON_TF
#1E6B52	AT5G54860	Drought	NON_TF
#1E6B52	AT3G03050	Drought	NON_TF
#FFD602	AT2G32190	Drought and Salt	NON_TF
#1E6B52	AT5G60890	Drought	TF
#1E6B52	AT1G56060	Drought	NON_TF
#FFD602	AT5G56980	Drought and Salt	NON_TF
#FFD602	AT4G05100	Drought and Salt	TF
#1E6B52	AT1G30040	Drought	NON_TF
#1E6B52	AT3G55840	Drought	NON_TF
#1E6B52	AT1G04220	Drought	NON_TF
#1E6B52	AT3G05650	Drought	NON_TF
#1E6B52	AT1G27910	Drought	NON_TF
#1E6B52	AT1G58420	Drought	NON_TF
#1E6B52	AT1G01560	Drought	NON_TF
#A69363	AT2G36640	Salt	NON_TF
#A69363	AT3G01590	Salt	NON_TF
#A69363	AT3G10340	Salt	NON_TF
#1E6B52	AT4G37370	Drought	NON_TF
#1E6B52	AT4G29740	Drought	NON_TF
#1E6B52	AT4G31800	Drought	TF
#1E6B52	AT3G24350	Drought	NON_TF
#1E6B52	AT4G35985	Drought	NON_TF
#1E6B52	AT1G01260	Drought	TF
#1E6B52	AT5G16830	Drought	NON_TF
#1E6B52	AT3G05580	Drought	NON_TF
#1E6B52	AT3G21700	Drought	NON_TF
#1E6B52	AT3G25250	Drought	NON_TF
#FFD602	AT3G29320	Drought and Salt	NON_TF
#1E6B52	AT2G15970	Drought	NON_TF
#1E6B52	AT1G22740	Drought	NON_TF
#1E6B52	AT2G42790	Drought	NON_TF
#FFD602	AT1G22370	Drought and Salt	NON_TF
#1E6B52	AT1G07040	Drought	NON_TF
#1E6B52	AT5G10780	Drought	NON_TF
#FFD602	AT3G12490	Drought and Salt	NON_TF
#FFD602	AT3G18080	Drought and Salt	NON_TF
#1E6B52	AT3G19490	Drought	NON_TF
#FFD602	AT5G05200	Drought and Salt	NON_TF
#FFD602	AT3G01310	Drought and Salt	NON_TF
#FFD602	AT2G40840	Drought and Salt	NON_TF
#1E6B52	AT4G27440	Drought	NON_TF
#1E6B52	AT3G62660	Drought	NON_TF
#1E6B52	AT1G57540	Drought	NON_TF
#FFD602	AT1G22070	Drought and Salt	NON_TF
#FFD602	AT1G75800	Drought and Salt	NON_TF
#1E6B52	AT5G02160	Drought	NON_TF
#1E6B52	AT2G40940	Drought	NON_TF
#FFD602	AT3G53800	Drought and Salt	NON_TF
#A69363	AT5G02860	Salt	NON_TF
#A69363	AT4G01040	Salt	NON_TF
#1E6B52	AT5G44210	Drought	TF
#1E6B52	AT1G33590	Drought	NON_TF
#1E6B52	AT5G57710	Drought	NON_TF
#1E6B52	AT2G38360	Drought	NON_TF
#1E6B52	AT5G05300	Drought	NON_TF
#1E6B52	AT2G20880	Drought	TF
#FFD602	AT3G09600	Drought and Salt	TF
#1E6B52	AT2G34460	Drought	NON_TF
#1E6B52	AT3G24170	Drought	NON_TF
#1E6B52	AT1G78580	Drought	NON_TF
#1E6B52	AT1G60540	Drought	NON_TF
#1E6B52	AT3G26570	Drought	NON_TF
#1E6B52	AT2G30490	Drought	NON_TF
#1E6B52	AT4G30950	Drought	NON_TF
#1E6B52	AT5G54130	Drought	NON_TF
#1E6B52	AT3G29030	Drought	NON_TF
#1E6B52	AT2G34720	Drought	TF
#1E6B52	AT5G53200	Drought	TF
#1E6B52	AT1G10740	Drought	NON_TF
#1E6B52	AT5G62130	Drought	NON_TF
#1E6B52	AT1G77090	Drought	NON_TF
#1E6B52	AT2G01890	Drought	NON_TF
#1E6B52	AT5G47050	Drought	NON_TF
#FFD602	AT1G02820	Drought and Salt	NON_TF
#1E6B52	AT3G51750	Drought	NON_TF
#1E6B52	AT3G22540	Drought	NON_TF
#1E6B52	AT2G21320	Drought	TF
#1E6B52	AT3G27350	Drought	NON_TF
#A69363	AT5G01740	Salt	NON_TF
#A69363	AT2G48020	Salt	NON_TF
#A69363	AT1G32440	Salt	NON_TF
#A69363	AT1G64490	Salt	NON_TF
#1E6B52	AT4G26480	Drought	NON_TF
#1E6B52	AT1G69530	Drought	NON_TF
#FFD602	AT5G16590	Drought and Salt	NON_TF
#1E6B52	AT5G17230	Drought	NON_TF
#1E6B52	AT5G48760	Drought	NON_TF
#1E6B52	AT2G21650	Drought	NON_TF
#1E6B52	AT5G04280	Drought	NON_TF
#1E6B52	AT1G67700	Drought	NON_TF
#1E6B52	AT4G18970	Drought	NON_TF
#1E6B52	AT2G38730	Drought	NON_TF
#1E6B52	AT5G64850	Drought	NON_TF
#FFD602	AT4G39780	Drought and Salt	TF
#1E6B52	AT1G65490	Drought	NON_TF
#1E6B52	AT3G21110	Drought	NON_TF
#A69363	AT1G66200	Salt	NON_TF
#A69363	AT5G17310	Salt	NON_TF
#A69363	AT5G14760	Salt	NON_TF
#1E6B52	AT5G53750	Drought	NON_TF
#1E6B52	AT1G35230	Drought	NON_TF
#1E6B52	AT3G25180	Drought	NON_TF
#FFD602	AT3G26580	Drought and Salt	NON_TF
#A69363	AT3G62750	Salt	NON_TF
#A69363	AT4G37470	Salt	NON_TF
#A69363	AT4G35480	Salt	NON_TF
#A69363	AT3G53180	Salt	NON_TF
#A69363	AT5G19540	Salt	NON_TF
#1E6B52	AT5G08520	Drought	TF
#FFD602	AT3G10120	Drought and Salt	NON_TF
#1E6B52	AT3G22970	Drought	NON_TF
#1E6B52	AT1G68560	Drought	NON_TF
#FFD602	AT1G77210	Drought and Salt	NON_TF
#1E6B52	AT1G60140	Drought	NON_TF
#1E6B52	AT3G58750	Drought	NON_TF
#1E6B52	AT4G18930	Drought	NON_TF
#1E6B52	AT1G04400	Drought	NON_TF
#1E6B52	AT5G35170	Drought	NON_TF
#1E6B52	AT3G51390	Drought	NON_TF
#1E6B52	AT2G28660	Drought	NON_TF
#FFD602	AT1G24440	Drought and Salt	NON_TF
#1E6B52	AT5G03470	Drought	NON_TF
#1E6B52	AT5G64920	Drought	NON_TF
#1E6B52	AT5G43810	Drought	NON_TF
#1E6B52	AT5G18590	Drought	NON_TF
#1E6B52	AT2G43535	Drought	NON_TF
#1E6B52	AT2G46550	Drought	NON_TF
#1E6B52	AT3G52840	Drought	NON_TF
#1E6B52	AT4G04340	Drought	NON_TF
#1E6B52	AT3G47160	Drought	NON_TF
#1E6B52	AT3G57470	Drought	NON_TF
#1E6B52	AT5G18640	Drought	NON_TF
#1E6B52	AT4G30690	Drought	NON_TF
#1E6B52	AT4G39090	Drought	NON_TF
#1E6B52	AT1G12780	Drought	NON_TF
#1E6B52	AT1G49300	Drought	NON_TF
#FFD602	AT4G05150	Drought and Salt	NON_TF
#1E6B52	AT1G26580	Drought	NON_TF
#1E6B52	AT1G30360	Drought	NON_TF
#1E6B52	AT1G16840	Drought	NON_TF
#1E6B52	AT1G08660	Drought	NON_TF
#1E6B52	AT1G52140	Drought	NON_TF
#FFD602	AT1G70820	Drought and Salt	NON_TF
#A69363	AT2G33380	Salt	NON_TF
#1E6B52	AT3G50060	Drought	TF
#1E6B52	AT3G04640	Drought	NON_TF
#FFD602	AT3G46600	Drought and Salt	TF
#1E6B52	AT1G66400	Drought	NON_TF
#FFD602	AT3G18560	Drought and Salt	NON_TF
#1E6B52	AT5G50915	Drought	TF
#1E6B52	AT1G02660	Drought	NON_TF
#1E6B52	AT1G63160	Drought	NON_TF
#1E6B52	AT3G19030	Drought	NON_TF
#1E6B52	AT1G77250	Drought	TF
#FFD602	AT4G25620	Drought and Salt	NON_TF
#1E6B52	AT1G78080	Drought	TF
#1E6B52	AT4G32030	Drought	NON_TF
#1E6B52	AT3G11650	Drought	NON_TF
#1E6B52	AT4G11280	Drought	NON_TF
#1E6B52	AT1G22190	Drought	TF
#FFD602	AT2G40000	Drought and Salt	NON_TF
#1E6B52	AT2G41010	Drought	NON_TF
#1E6B52	AT1G53910	Drought	TF
#1E6B52	AT2G42040	Drought	TF
#FFD602	AT5G01210	Drought and Salt	NON_TF
#1E6B52	AT1G19740	Drought	NON_TF
#FFD602	AT2G42530	Drought and Salt	NON_TF
#1E6B52	AT3G55760	Drought	NON_TF
#1E6B52	AT1G66350	Drought	TF
#1E6B52	AT1G27930	Drought	NON_TF
#1E6B52	AT1G53230	Drought	TF
#FFD602	AT3G24760	Drought and Salt	NON_TF
#1E6B52	AT4G29080	Drought	TF
#1E6B52	AT3G63060	Drought	NON_TF
#1E6B52	AT2G47770	Drought	NON_TF
#1E6B52	AT1G76600	Drought	NON_TF
#1E6B52	AT3G16720	Drought	NON_TF
#1E6B52	AT4G24380	Drought	NON_TF
#1E6B52	AT1G11050	Drought	NON_TF
#A69363	AT2G25200	Salt	NON_TF
#1E6B52	AT5G24110	Drought	TF
#1E6B52	AT1G76970	Drought	NON_TF
#1E6B52	AT2G18690	Drought	NON_TF
#1E6B52	AT1G16420	Drought	NON_TF
#1E6B52	AT5G17000	Drought	NON_TF
#1E6B52	AT1G28480	Drought	NON_TF
#1E6B52	AT4G18950	Drought	NON_TF
#FFD602	AT5G25190	Drought and Salt	TF
#FFD602	AT2G24790	Drought and Salt	TF
#FFD602	AT4G01250	Drought and Salt	TF
#1E6B52	AT1G75470	Drought	NON_TF
#1E6B52	AT3G15530	Drought	NON_TF
#FFD602	AT5G62020	Drought and Salt	TF
#A69363	AT2G37950	Salt	NON_TF
#A69363	AT3G06080	Salt	NON_TF
#FFD602	AT2G25900	Drought and Salt	TF
#A69363	AT3G02550	Salt	TF
#A69363	AT5G19120	Salt	NON_TF
#FFD602	AT2G40330	Drought and Salt	NON_TF
#A69363	AT1G31290	Salt	NON_TF
#A69363	AT2G30040	Salt	NON_TF
#FFD602	AT3G55560	Drought and Salt	NON_TF
#A69363	AT4G10270	Salt	NON_TF
#A69363	AT5G41080	Salt	NON_TF
#FFD602	AT5G28770	Drought and Salt	TF
#A69363	AT5G46780	Salt	NON_TF
#FFD602	AT1G19050	Drought and Salt	TF
#A69363	AT3G62950	Salt	NON_TF
#A69363	AT5G24210	Salt	NON_TF
#A69363	AT3G49810	Salt	NON_TF
#A69363	AT2G18700	Salt	NON_TF
#FFD602	AT5G51190	Drought and Salt	TF
#1E6B52	AT1G31660	Drought	NON_TF
#1E6B52	AT5G58090	Drought	NON_TF
#1E6B52	AT3G57290	Drought	NON_TF
#1E6B52	AT1G10840	Drought	NON_TF
#1E6B52	AT3G23620	Drought	NON_TF
#A69363	AT5G14730	Salt	NON_TF
#1E6B52	AT3G15210	Drought	TF
#1E6B52	AT5G39785	Drought	NON_TF
#1E6B52	AT3G19580	Drought	TF
#1E6B52	AT5G67250	Drought	NON_TF
#FFD602	AT5G61600	Drought and Salt	TF
#1E6B52	AT5G14520	Drought	NON_TF
#1E6B52	AT1G48570	Drought	NON_TF
#1E6B52	AT1G15430	Drought	NON_TF
#1E6B52	AT2G41110	Drought	NON_TF
#1E6B52	AT5G26920	Drought	NON_TF
#1E6B52	AT1G62310	Drought	TF
#1E6B52	AT3G52240	Drought	NON_TF
#FFD602	AT1G69570	Drought and Salt	TF
#1E6B52	AT2G19540	Drought	NON_TF
#1E6B52	AT1G69700	Drought	NON_TF
#1E6B52	AT1G80640	Drought	NON_TF
#1E6B52	AT3G06070	Drought	NON_TF
#1E6B52	AT2G38480	Drought	NON_TF
#1E6B52	AT3G62930	Drought	NON_TF
#FFD602	AT5G18670	Drought and Salt	NON_TF
#FFD602	AT5G58900	Drought and Salt	TF
#1E6B52	AT1G31850	Drought	NON_TF
#1E6B52	AT2G47390	Drought	NON_TF
#1E6B52	AT3G49620	Drought	NON_TF
#1E6B52	AT3G11230	Drought	NON_TF
#1E6B52	AT5G15230	Drought	NON_TF
#1E6B52	AT1G21600	Drought	NON_TF
#1E6B52	AT1G25275	Drought	NON_TF
#1E6B52	AT4G24990	Drought	NON_TF
#1E6B52	AT1G31830	Drought	NON_TF
#1E6B52	AT2G25930	Drought	NON_TF
#1E6B52	AT4G39080	Drought	NON_TF
#1E6B52	AT2G25730	Drought	NON_TF
#1E6B52	AT4G30500	Drought	NON_TF
#1E6B52	AT5G04470	Drought	NON_TF
#1E6B52	AT3G05970	Drought	NON_TF
#A69363	AT1G10090	Salt	NON_TF
#A69363	AT1G65900	Salt	NON_TF
#A69363	AT2G04700	Salt	NON_TF
#1E6B52	AT5G60850	Drought	TF
#1E6B52	AT3G54030	Drought	NON_TF
#1E6B52	AT4G21060	Drought	NON_TF
#1E6B52	AT1G28370	Drought	TF
#1E6B52	AT5G66070	Drought	NON_TF
#1E6B52	AT1G62440	Drought	NON_TF
#1E6B52	AT2G42760	Drought	NON_TF
#1E6B52	AT1G50740	Drought	NON_TF
#FFD602	AT1G49480	Drought and Salt	TF
#1E6B52	AT5G59020	Drought	NON_TF
#1E6B52	AT5G50420	Drought	NON_TF
#1E6B52	AT3G11590	Drought	NON_TF
#1E6B52	AT1G14720	Drought	NON_TF
#1E6B52	AT4G33500	Drought	NON_TF
#A69363	AT4G36970	Salt	NON_TF
#1E6B52	AT2G03340	Drought	TF
#1E6B52	AT4G16710	Drought	NON_TF
#1E6B52	AT4G17486	Drought	NON_TF
#1E6B52	AT3G15360	Drought	NON_TF
#1E6B52	AT3G46970	Drought	NON_TF
#1E6B52	AT5G26880	Drought	NON_TF
#1E6B52	AT4G04330	Drought	NON_TF
#1E6B52	AT1G02560	Drought	NON_TF
#1E6B52	AT1G72050	Drought	TF
#1E6B52	AT3G18600	Drought	NON_TF
#1E6B52	AT2G40360	Drought	NON_TF
#1E6B52	AT4G35950	Drought	NON_TF
#1E6B52	AT1G04170	Drought	NON_TF
#1E6B52	AT3G29200	Drought	NON_TF
#FFD602	AT3G20310	Drought and Salt	TF
#1E6B52	AT5G09760	Drought	NON_TF
#1E6B52	AT1G68690	Drought	NON_TF
#1E6B52	AT2G17480	Drought	NON_TF
#1E6B52	AT1G61660	Drought	TF
#1E6B52	AT4G39640	Drought	NON_TF
#1E6B52	AT1G49430	Drought	NON_TF
#FFD602	AT5G11060	Drought and Salt	TF
#1E6B52	AT1G20620	Drought	NON_TF
#1E6B52	AT3G63210	Drought	NON_TF
#1E6B52	AT2G25450	Drought	NON_TF
#A69363	AT1G49660	Salt	NON_TF
#A69363	AT4G16190	Salt	NON_TF
#A69363	AT4G21960	Salt	NON_TF
#A69363	AT1G18710	Salt	TF
#1E6B52	AT5G46590	Drought	TF
#1E6B52	AT4G18540	Drought	NON_TF
#FFD602	AT5G62470	Drought and Salt	TF
#1E6B52	AT2G27260	Drought	NON_TF
#1E6B52	AT2G17040	Drought	TF
#A69363	AT1G80110	Salt	NON_TF
#A69363	AT1G73390	Salt	NON_TF
#1E6B52	AT5G65310	Drought	TF
#1E6B52	AT3G04070	Drought	TF
#1E6B52	AT1G72680	Drought	NON_TF
#1E6B52	AT5G20950	Drought	NON_TF
#1E6B52	AT1G73790	Drought	NON_TF
#1E6B52	AT3G13670	Drought	NON_TF
#1E6B52	AT4G36760	Drought	NON_TF
#1E6B52	AT5G06839	Drought	TF
#1E6B52	AT1G74110	Drought	NON_TF
#1E6B52	AT2G19500	Drought	NON_TF
#1E6B52	AT1G69490	Drought	TF
#A69363	AT5G52640	Salt	NON_TF
#A69363	AT2G13770	Salt	NON_TF
#A69363	AT3G53230	Salt	NON_TF
#A69363	AT1G52560	Salt	NON_TF
#A69363	AT4G12400	Salt	NON_TF
#A69363	AT3G07090	Salt	NON_TF
#A69363	AT2G34310	Salt	NON_TF
#A69363	AT1G09140	Salt	NON_TF
#A69363	AT2G20560	Salt	NON_TF
#1E6B52	AT1G06160	Drought	TF
#1E6B52	AT5G44420	Drought	NON_TF
#1E6B52	AT4G13510	Drought	NON_TF
#FFD602	AT2G23340	Drought and Salt	TF
#1E6B52	AT1G01610	Drought	NON_TF
#A69363	AT2G25520	Salt	NON_TF
#1E6B52	AT3G46560	Drought	NON_TF
#1E6B52	AT5G62440	Drought	NON_TF
#FFD602	AT1G25550	Drought and Salt	TF
#1E6B52	AT5G46710	Drought	TF
#1E6B52	AT1G19770	Drought	NON_TF
#A69363	AT5G67420	Salt	TF
#A69363	AT4G21510	Salt	NON_TF
#A69363	AT4G01330	Salt	NON_TF
#FFD602	AT1G68840	Drought and Salt	TF
#A69363	AT2G22960	Salt	NON_TF
#A69363	AT2G39705	Salt	NON_TF
#A69363	AT3G06020	Salt	NON_TF
#A69363	AT1G21920	Salt	NON_TF
#A69363	AT2G28630	Salt	NON_TF
#A69363	AT4G12690	Salt	NON_TF
#1E6B52	AT2G45420	Drought	TF
#1E6B52	AT5G61710	Drought	NON_TF
#1E6B52	AT1G06210	Drought	NON_TF
#A69363	AT2G17840	Salt	NON_TF
#1E6B52	AT3G47620	Drought	TF
#FFD602	AT1G43160	Drought and Salt	TF
#1E6B52	AT5G19110	Drought	NON_TF
#1E6B52	AT4G34710	Drought	NON_TF
#1E6B52	AT3G17810	Drought	NON_TF
#1E6B52	AT1G06620	Drought	NON_TF
#A69363	AT4G15530	Salt	NON_TF
#A69363	AT5G65390	Salt	NON_TF
#A69363	AT5G13420	Salt	NON_TF
#A69363	AT5G15450	Salt	NON_TF
#A69363	AT2G31730	Salt	NON_TF
#1E6B52	AT2G32030	Drought	TF
#A69363	AT1G36160	Salt	NON_TF
#1E6B52	AT2G40260	Drought	TF
#1E6B52	AT5G51020	Drought	NON_TF
#FFD602	AT2G02450	Drought and Salt	TF
#1E6B52	AT3G56260	Drought	NON_TF
#1E6B52	AT2G36590	Drought	NON_TF
#1E6B52	AT5G61960	Drought	NON_TF
#A69363	AT5G04770	Salt	NON_TF
#A69363	AT1G68520	Salt	TF
#A69363	AT5G05440	Salt	NON_TF
#A69363	AT5G51550	Salt	NON_TF
#A69363	AT1G23390	Salt	NON_TF
#FFD602	AT5G62920	Drought and Salt	TF
#A69363	AT4G24180	Salt	NON_TF
#A69363	AT5G59430	Salt	NON_TF
#A69363	AT2G20670	Salt	NON_TF
#FFD602	AT2G02080	Drought and Salt	TF
#1E6B52	AT3G26510	Drought	NON_TF
#1E6B52	AT1G76110	Drought	TF
#1E6B52	AT1G71970	Drought	NON_TF
#FFD602	AT5G18630	Drought and Salt	NON_TF
#A69363	AT5G14940	Salt	NON_TF
#1E6B52	AT1G13450	Drought	TF
#1E6B52	AT3G60740	Drought	NON_TF
#1E6B52	AT1G72150	Drought	NON_TF
#FFD602	AT1G77920	Drought and Salt	TF
#1E6B52	AT5G43060	Drought	NON_TF
#1E6B52	AT2G27680	Drought	NON_TF
#1E6B52	AT1G03475	Drought	NON_TF
#1E6B52	AT5G15770	Drought	TF
#1E6B52	AT1G77020	Drought	NON_TF
#1E6B52	AT2G05520	Drought	NON_TF
#1E6B52	AT2G34470	Drought	NON_TF
#1E6B52	AT5G52450	Drought	NON_TF
#FFD602	AT4G38460	Drought and Salt	NON_TF
#1E6B52	AT2G27920	Drought	NON_TF
#1E6B52	AT4G16447	Drought	NON_TF
#1E6B52	AT1G25530	Drought	NON_TF
#1E6B52	AT4G37990	Drought	NON_TF
#A69363	AT1G47710	Salt	NON_TF
#A69363	AT1G13950	Salt	NON_TF
#A69363	AT4G33985	Salt	NON_TF
#A69363	AT5G39730	Salt	NON_TF
#A69363	AT3G62240	Salt	NON_TF
#A69363	AT4G14020	Salt	NON_TF
#A69363	AT1G65430	Salt	NON_TF
#A69363	AT5G51430	Salt	NON_TF
#A69363	AT1G44170	Salt	NON_TF
#A69363	AT1G19690	Salt	NON_TF
#A69363	AT5G42890	Salt	NON_TF
#A69363	AT3G49390	Salt	NON_TF
#A69363	AT1G53310	Salt	NON_TF
#1E6B52	AT1G76590	Drought	TF
#FFD602	AT5G26340	Drought and Salt	NON_TF
#1E6B52	AT5G24590	Drought	TF
#FFD602	AT2G01930	Drought and Salt	TF
#FFD602	AT1G80440	Drought and Salt	NON_TF
#1E6B52	AT2G27050	Drought	TF
#A69363	AT5G57180	Salt	TF
#1E6B52	AT3G24050	Drought	TF
#1E6B52	AT5G55380	Drought	NON_TF
#1E6B52	AT3G05500	Drought	NON_TF
#1E6B52	AT4G36900	Drought	TF
#1E6B52	AT3G53600	Drought	TF
#FFD602	AT1G49010	Drought and Salt	TF
#1E6B52	AT5G07240	Drought	NON_TF
#1E6B52	AT4G28270	Drought	NON_TF
#1E6B52	AT1G78180	Drought	NON_TF
#A69363	AT5G13510	Salt	NON_TF
#A69363	AT1G11860	Salt	NON_TF
#A69363	AT5G42765	Salt	NON_TF
#A69363	AT2G28000	Salt	NON_TF
#A69363	AT2G32640	Salt	NON_TF
#A69363	AT3G55800	Salt	NON_TF
#A69363	AT1G09340	Salt	NON_TF
#A69363	AT5G14740	Salt	NON_TF
#A69363	AT4G28080	Salt	NON_TF
#A69363	AT1G74070	Salt	NON_TF
#A69363	AT3G63410	Salt	NON_TF
#A69363	AT5G20720	Salt	NON_TF
#A69363	AT3G56910	Salt	NON_TF
#A69363	AT4G29060	Salt	NON_TF
#1E6B52	AT3G23690	Drought	TF
#1E6B52	AT1G70000	Drought	TF
#1E6B52	AT2G26590	Drought	NON_TF
#1E6B52	AT2G21330	Drought	NON_TF
#1E6B52	AT1G43700	Drought	TF
#1E6B52	AT4G31410	Drought	NON_TF
#1E6B52	AT1G55330	Drought	NON_TF
#FFD602	AT2G22540	Drought and Salt	TF
#1E6B52	AT3G23080	Drought	NON_TF
#1E6B52	AT1G71030	Drought	TF
#1E6B52	AT2G23840	Drought	NON_TF
#1E6B52	AT3G45780	Drought	NON_TF
#A69363	AT5G16570	Salt	NON_TF
#A69363	AT1G16240	Salt	NON_TF
#A69363	AT5G62170	Salt	NON_TF
#A69363	AT1G24575	Salt	NON_TF
#1E6B52	AT2G28570	Drought	NON_TF
#1E6B52	AT5G47370	Drought	TF
#1E6B52	AT1G67340	Drought	NON_TF
#1E6B52	AT3G49690	Drought	TF
#1E6B52	AT2G43945	Drought	NON_TF
#1E6B52	AT3G12250	Drought	TF
#1E6B52	AT1G13910	Drought	NON_TF
#1E6B52	AT3G15500	Drought	TF
#1E6B52	AT4G27657	Drought	NON_TF
#FFD602	AT4G25490	Drought and Salt	TF
#1E6B52	AT4G01280	Drought	TF
#1E6B52	AT4G30960	Drought	NON_TF
#1E6B52	AT1G15590	Drought	NON_TF
#1E6B52	AT2G01060	Drought	TF
#1E6B52	AT2G17640	Drought	NON_TF
#1E6B52	AT4G35750	Drought	NON_TF
#1E6B52	AT1G28320	Drought	NON_TF
#1E6B52	AT1G65720	Drought	NON_TF
#1E6B52	AT1G26670	Drought	NON_TF
#FFD602	AT2G47070	Drought and Salt	TF
#1E6B52	AT4G30850	Drought	NON_TF
#1E6B52	AT3G02880	Drought	NON_TF
#1E6B52	AT2G35930	Drought	NON_TF
#A69363	AT5G65700	Salt	NON_TF
#1E6B52	AT2G33480	Drought	TF
#1E6B52	AT5G53880	Drought	NON_TF
#FFD602	AT5G39660	Drought and Salt	TF
#FFD602	AT1G49560	Drought and Salt	TF
#1E6B52	AT4G36940	Drought	NON_TF
#1E6B52	AT5G19440	Drought	NON_TF
#FFD602	AT5G36890	Drought and Salt	NON_TF
#A69363	AT5G48370	Salt	NON_TF
#A69363	AT3G05520	Salt	NON_TF
#A69363	AT5G67490	Salt	NON_TF
#A69363	AT5G61570	Salt	NON_TF
#A69363	AT5G25070	Salt	NON_TF
#A69363	AT3G48170	Salt	NON_TF
#A69363	AT4G02500	Salt	NON_TF
#A69363	AT1G05180	Salt	NON_TF
#A69363	AT1G72700	Salt	NON_TF
#A69363	AT5G20280	Salt	NON_TF
#A69363	AT2G18950	Salt	NON_TF
#A69363	AT1G10410	Salt	NON_TF
#A69363	AT5G66420	Salt	NON_TF
#1E6B52	AT1G64620	Drought	TF
#1E6B52	AT4G23850	Drought	NON_TF
#1E6B52	AT3G17800	Drought	NON_TF
#1E6B52	AT5G56160	Drought	NON_TF
#FFD602	AT1G74840	Drought and Salt	TF
#1E6B52	AT5G56100	Drought	NON_TF
#FFD602	AT1G72820	Drought and Salt	NON_TF
#FFD602	AT1G70290	Drought and Salt	NON_TF
#A69363	AT3G07340	Salt	TF
#1E6B52	AT1G62300	Drought	TF
#1E6B52	AT1G70140	Drought	NON_TF
#1E6B52	AT1G03370	Drought	NON_TF
#FFD602	AT2G45660	Drought and Salt	TF
#1E6B52	AT4G27710	Drought	NON_TF
#1E6B52	AT4G35060	Drought	NON_TF
#1E6B52	AT4G12030	Drought	NON_TF
#1E6B52	AT5G32440	Drought	NON_TF
#1E6B52	AT4G15920	Drought	NON_TF
#1E6B52	AT1G58360	Drought	NON_TF
#A69363	AT1G69480	Salt	NON_TF
#FFD602	AT4G17460	Drought and Salt	TF
#A69363	AT3G49780	Salt	NON_TF
#A69363	AT2G26710	Salt	NON_TF
#FFD602	AT2G18450	Drought and Salt	NON_TF
#A69363	AT1G03850	Salt	NON_TF
#A69363	AT1G76890	Salt	TF
#A69363	AT2G44080	Salt	NON_TF
#FFD602	AT5G47390	Drought and Salt	TF
#1E6B52	AT2G38120	Drought	NON_TF
#1E6B52	AT4G22360	Drought	TF
#1E6B52	AT3G07350	Drought	NON_TF
#FFD602	AT3G02170	Drought and Salt	NON_TF
#A69363	AT2G02710	Salt	NON_TF
#A69363	AT1G80920	Salt	NON_TF
#A69363	AT1G70590	Salt	NON_TF
#A69363	AT1G49500	Salt	NON_TF
#FFD602	AT2G20180	Drought and Salt	TF
#A69363	AT5G04190	Salt	NON_TF
#A69363	AT5G52900	Salt	NON_TF
#A69363	AT3G29670	Salt	NON_TF
#A69363	AT4G37590	Salt	NON_TF
#1E6B52	AT2G46710	Drought	NON_TF
#A69363	AT3G23030	Salt	TF
#FFD602	AT4G27450	Drought and Salt	NON_TF
#A69363	AT1G03610	Salt	NON_TF
#1E6B52	AT5G02840	Drought	TF
#FFD602	AT4G12980	Drought and Salt	NON_TF
#1E6B52	AT2G35260	Drought	NON_TF
#1E6B52	AT1G68320	Drought	TF
#FFD602	AT5G25390	Drought and Salt	TF
#1E6B52	AT3G09470	Drought	NON_TF
#A69363	AT5G08100	Salt	NON_TF
#A69363	AT1G09795	Salt	NON_TF
#A69363	AT3G10850	Salt	NON_TF
#A69363	AT5G41460	Salt	NON_TF
#A69363	AT1G66430	Salt	NON_TF
#A69363	AT1G74520	Salt	NON_TF
#FFD602	AT3G50410	Drought and Salt	TF
#1E6B52	AT4G12790	Drought	NON_TF
#A69363	AT4G13720	Salt	NON_TF
#A69363	AT4G39900	Salt	NON_TF
#A69363	AT1G01390	Salt	NON_TF
#1E6B52	AT4G18390	Drought	TF
#1E6B52	AT4G03400	Drought	NON_TF
#FFD602	AT1G19000	Drought and Salt	TF
#1E6B52	AT1G22290	Drought	NON_TF
#1E6B52	AT5G03130	Drought	NON_TF
#1E6B52	AT1G20640	Drought	TF
#1E6B52	AT4G33666	Drought	NON_TF
#1E6B52	AT1G48260	Drought	NON_TF
#FFD602	AT5G48490	Drought and Salt	NON_TF
#A69363	AT1G69160	Salt	NON_TF
#A69363	AT5G58350	Salt	NON_TF
#A69363	AT3G59060	Salt	TF
#A69363	AT5G55970	Salt	NON_TF
#A69363	AT5G22390	Salt	NON_TF
#FFD602	AT4G23750	Drought and Salt	TF
#1E6B52	AT4G39990	Drought	NON_TF
#1E6B52	AT3G61190	Drought	NON_TF
#1E6B52	AT5G35620	Drought	NON_TF
#A69363	AT5G02450	Salt	NON_TF
#A69363	AT2G41100	Salt	NON_TF
#FFD602	AT2G46680	Drought and Salt	TF
#1E6B52	AT3G05830	Drought	NON_TF
#A69363	AT5G02230	Salt	NON_TF
#A69363	AT5G53710	Salt	NON_TF
#A69363	AT3G21240	Salt	NON_TF
#A69363	AT3G44280	Salt	NON_TF
#A69363	AT2G21830	Salt	NON_TF
#A69363	AT1G27200	Salt	NON_TF
#A69363	AT2G04350	Salt	NON_TF
#A69363	AT1G72240	Salt	NON_TF
#A69363	AT4G30490	Salt	NON_TF
#A69363	AT5G57610	Salt	NON_TF
#A69363	AT3G14560	Salt	NON_TF
#A69363	AT4G04800	Salt	NON_TF
#A69363	AT3G22370	Salt	NON_TF
#FFD602	AT1G21910	Drought and Salt	TF
#1E6B52	AT1G25400	Drought	NON_TF
#1E6B52	AT1G04040	Drought	NON_TF
#A69363	AT5G67190	Salt	TF
#A69363	AT4G34138	Salt	NON_TF
#1E6B52	AT1G74930	Drought	TF
#1E6B52	AT2G43010	Drought	TF
#1E6B52	AT3G06780	Drought	NON_TF
#1E6B52	AT1G31630	Drought	TF
#1E6B52	AT1G68440	Drought	NON_TF
#A69363	AT1G12020	Salt	NON_TF
#A69363	AT5G01600	Salt	NON_TF
#1E6B52	AT2G28200	Drought	TF
#1E6B52	AT5G46790	Drought	NON_TF
#1E6B52	AT3G60530	Drought	TF
#1E6B52	AT2G37430	Drought	TF
#1E6B52	AT4G33050	Drought	NON_TF
#1E6B52	AT2G35940	Drought	TF
#1E6B52	AT2G29450	Drought	NON_TF
#1E6B52	AT3G15270	Drought	TF
#1E6B52	AT1G69970	Drought	NON_TF
#FFD602	AT3G61890	Drought and Salt	TF
#A69363	AT1G56580	Salt	NON_TF
#1E6B52	AT1G12610	Drought	TF
#1E6B52	AT5G24930	Drought	TF
#A69363	AT5G52250	Salt	NON_TF
#A69363	AT1G01930	Salt	NON_TF
#A69363	AT2G35800	Salt	NON_TF
#A69363	AT2G39870	Salt	NON_TF
#1E6B52	AT3G10500	Drought	TF
#1E6B52	AT3G60420	Drought	NON_TF
#FFD602	AT1G06180	Drought and Salt	TF
#1E6B52	AT1G29880	Drought	NON_TF
#A69363	AT5G50360	Salt	NON_TF
#1E6B52	AT2G24570	Drought	TF
#1E6B52	AT4G00050	Drought	TF
#1E6B52	AT4G01720	Drought	TF
#1E6B52	AT5G11090	Drought	NON_TF
#1E6B52	AT1G34190	Drought	TF
#1E6B52	AT5G18850	Drought	NON_TF
#1E6B52	AT5G49330	Drought	TF
#1E6B52	AT1G65060	Drought	NON_TF
#FFD602	AT2G22430	Drought and Salt	TF
#1E6B52	AT3G06500	Drought	NON_TF
#1E6B52	AT3G53960	Drought	NON_TF
#A69363	AT1G07230	Salt	NON_TF
#1E6B52	AT3G04060	Drought	TF
#1E6B52	AT3G15220	Drought	NON_TF
#1E6B52	AT1G71450	Drought	TF
#1E6B52	AT5G47380	Drought	NON_TF
#FFD602	AT5G05790	Drought and Salt	TF
#1E6B52	AT5G05210	Drought	NON_TF
#A69363	AT5G48220	Salt	NON_TF
#A69363	AT4G19820	Salt	NON_TF
#A69363	AT1G53120	Salt	NON_TF
#A69363	AT2G28950	Salt	NON_TF
#A69363	AT1G19510	Salt	TF
#A69363	AT3G61210	Salt	NON_TF
#A69363	AT1G78240	Salt	NON_TF
#A69363	AT4G10120	Salt	NON_TF
#A69363	AT4G15545	Salt	NON_TF
#A69363	AT2G36000	Salt	TF
#A69363	AT4G20360	Salt	NON_TF
#A69363	AT3G57330	Salt	NON_TF
#A69363	AT1G32540	Salt	NON_TF
#A69363	AT1G48610	Salt	NON_TF
#A69363	AT5G16470	Salt	NON_TF
#A69363	AT3G16240	Salt	NON_TF
#A69363	AT4G25170	Salt	NON_TF
#A69363	AT2G40020	Salt	NON_TF
#A69363	AT1G55370	Salt	NON_TF
#A69363	AT3G10720	Salt	NON_TF
#A69363	AT2G41510	Salt	NON_TF
#1E6B52	AT2G23320	Drought	TF
#1E6B52	AT3G21175	Drought	TF
#1E6B52	AT1G68100	Drought	NON_TF
#1E6B52	AT5G49650	Drought	NON_TF
#1E6B52	AT5G07700	Drought	TF
#1E6B52	AT5G23010	Drought	NON_TF
#FFD602	AT2G46830	Drought and Salt	TF
#A69363	AT1G32900	Salt	NON_TF
#FFD602	AT3G28910	Drought and Salt	TF
#FFD602	AT4G24240	Drought and Salt	TF
#A69363	AT4G30610	Salt	NON_TF
#1E6B52	AT2G45680	Drought	TF
#1E6B52	AT4G20170	Drought	NON_TF
#1E6B52	AT4G16110	Drought	TF
#1E6B52	AT3G10030	Drought	TF
#FFD602	AT1G29160	Drought and Salt	TF
#1E6B52	AT1G07880	Drought	NON_TF
#A69363	AT1G08470	Salt	NON_TF
#A69363	AT3G30300	Salt	NON_TF
#1E6B52	AT4G38620	Drought	TF
#1E6B52	AT4G01660	Drought	NON_TF
#1E6B52	AT4G18880	Drought	TF
#1E6B52	AT1G26220	Drought	TF
#1E6B52	AT5G46760	Drought	TF
#1E6B52	AT5G17700	Drought	NON_TF
#1E6B52	AT2G37120	Drought	TF
#1E6B52	AT4G14070	Drought	NON_TF
#1E6B52	AT2G44940	Drought	TF
#1E6B52	AT4G30080	Drought	TF
#1E6B52	AT1G49970	Drought	NON_TF
#1E6B52	AT4G25470	Drought	TF
#FFD602	AT5G05090	Drought and Salt	TF
#1E6B52	AT5G63800	Drought	NON_TF
#A69363	AT1G73470	Salt	NON_TF
#A69363	AT2G28720	Salt	NON_TF
#1E6B52	AT5G67580	Drought	TF
#1E6B52	AT2G16750	Drought	NON_TF
#1E6B52	AT3G23210	Drought	TF
#FFD602	AT3G14180	Drought and Salt	TF
#FFD602	AT5G04170	Drought and Salt	NON_TF
#A69363	AT4G18240	Salt	NON_TF
#A69363	AT4G16750	Salt	TF
#A69363	AT1G13930	Salt	NON_TF
#A69363	AT5G11510	Salt	TF
#A69363	AT1G44110	Salt	NON_TF
#A69363	AT4G36730	Salt	TF
#A69363	AT4G28290	Salt	NON_TF
#A69363	AT1G68190	Salt	TF
#A69363	AT2G34620	Salt	TF
#A69363	AT4G36540	Salt	TF
#A69363	AT5G10030	Salt	TF
#A69363	AT5G05860	Salt	NON_TF
#A69363	AT5G13090	Salt	NON_TF
#A69363	AT3G52060	Salt	NON_TF
#A69363	AT2G37470	Salt	NON_TF
#A69363	AT1G11260	Salt	NON_TF
#A69363	AT3G59900	Salt	NON_TF
#A69363	AT1G49850	Salt	NON_TF
#A69363	AT1G69180	Salt	TF
#A69363	AT1G33900	Salt	NON_TF
#A69363	AT1G29390	Salt	NON_TF
#A69363	AT5G10860	Salt	NON_TF
#A69363	AT1G07420	Salt	NON_TF
#A69363	AT3G09540	Salt	NON_TF
#A69363	AT4G30660	Salt	NON_TF
#A69363	AT4G11660	Salt	TF
#A69363	AT2G04160	Salt	NON_TF
#A69363	AT4G23885	Salt	NON_TF
#A69363	AT4G36990	Salt	TF
#A69363	AT1G77120	Salt	NON_TF
#A69363	AT3G09440	Salt	NON_TF
#A69363	AT5G09590	Salt	NON_TF
#A69363	AT5G65470	Salt	NON_TF
#A69363	AT1G62740	Salt	NON_TF
#A69363	AT5G37670	Salt	NON_TF
#A69363	AT5G53400	Salt	NON_TF
#A69363	AT3G24500	Salt	TF
#A69363	AT1G48750	Salt	NON_TF
#A69363	AT1G57590	Salt	NON_TF
#A69363	AT5G43840	Salt	TF
#A69363	AT3G17790	Salt	NON_TF
#A69363	AT5G53120	Salt	NON_TF
#A69363	AT4G21980	Salt	NON_TF
#A69363	AT1G04360	Salt	NON_TF
#A69363	AT5G14960	Salt	TF
#A69363	AT3G18370	Salt	NON_TF
#A69363	AT1G51140	Salt	TF
#A69363	AT1G22160	Salt	NON_TF
#A69363	AT4G14010	Salt	NON_TF
#A69363	AT3G20250	Salt	NON_TF
#A69363	AT1G03290	Salt	NON_TF
#A69363	AT1G76180	Salt	NON_TF
#A69363	AT3G54340	Salt	TF
#A69363	AT5G20240	Salt	TF
#A69363	AT3G22830	Salt	TF
#A69363	AT2G45740	Salt	NON_TF
#A69363	AT2G32290	Salt	NON_TF
#A69363	AT5G51820	Salt	NON_TF
#A69363	AT1G68670	Salt	TF
#A69363	AT4G18340	Salt	NON_TF
#A69363	AT4G37610	Salt	TF
#A69363	AT3G48100	Salt	TF
#A69363	AT5G43700	Salt	TF
#A69363	AT1G75020	Salt	NON_TF
#A69363	AT2G40620	Salt	TF
#A69363	AT1G01250	Salt	TF
#A69363	AT1G47960	Salt	NON_TF
#A69363	AT1G12630	Salt	TF
#A69363	AT2G03710	Salt	TF
#A69363	AT1G09530	Salt	TF
#A69363	AT1G02205	Salt	NON_TF
#A69363	AT4G25480	Salt	TF
#A69363	AT1G53320	Salt	TF
#A69363	AT2G18300	Salt	TF
#A69363	AT4G37260	Salt	TF
#A69363	AT4G24370	Salt	NON_TF
#A69363	AT2G34770	Salt	NON_TF
#A69363	AT5G27600	Salt	NON_TF
#A69363	AT1G04120	Salt	NON_TF
#A69363	AT1G09850	Salt	NON_TF
#A69363	AT3G11020	Salt	TF
#A69363	AT4G32340	Salt	NON_TF
#A69363	AT1G49650	Salt	NON_TF
#A69363	AT1G21680	Salt	NON_TF
#A69363	AT3G04010	Salt	NON_TF
#A69363	AT5G61290	Salt	NON_TF
#A69363	AT5G39410	Salt	NON_TF
#A69363	AT1G47870	Salt	TF
#A69363	AT1G22300	Salt	NON_TF
#A69363	AT1G08810	Salt	TF
#A69363	AT3G13740	Salt	NON_TF
#A69363	AT1G32220	Salt	NON_TF
#A69363	AT5G49100	Salt	NON_TF
#A69363	AT1G63850	Salt	NON_TF
#A69363	AT1G75390	Salt	TF
#A69363	AT5G16910	Salt	NON_TF
#A69363	AT5G53870	Salt	NON_TF
#A69363	AT5G66400	Salt	NON_TF
#A69363	AT1G64110	Salt	NON_TF
#A69363	AT3G52540	Salt	TF
#A69363	AT5G05690	Salt	NON_TF
#A69363	AT5G05550	Salt	TF
#A69363	AT3G27280	Salt	NON_TF
#A69363	AT1G27940	Salt	NON_TF
#A69363	AT1G21460	Salt	NON_TF
#A69363	AT2G03500	Salt	TF
#A69363	AT4G32980	Salt	TF
#A69363	AT5G04820	Salt	TF
#A69363	AT1G03730	Salt	NON_TF
#A69363	AT4G18890	Salt	TF
#A69363	AT2G40610	Salt	NON_TF
#A69363	AT3G13510	Salt	NON_TF
#A69363	AT5G03150	Salt	TF
#A69363	AT5G13330	Salt	TF
#A69363	AT2G23610	Salt	NON_TF
#A69363	AT1G26210	Salt	NON_TF
#A69363	AT4G10350	Salt	TF
#A69363	AT3G08550	Salt	NON_TF
#A69363	AT5G62430	Salt	TF
#A69363	AT2G38150	Salt	NON_TF
#A69363	AT4G16150	Salt	TF
#A69363	AT1G75490	Salt	TF
#A69363	AT1G67050	Salt	NON_TF
#A69363	AT4G17810	Salt	TF
#A69363	AT3G16770	Salt	TF
#A69363	AT5G38520	Salt	NON_TF
#A69363	AT4G01550	Salt	TF
#A69363	AT5G59130	Salt	NON_TF
#A69363	AT2G23290	Salt	TF
#A69363	AT2G31230	Salt	TF
#A69363	AT2G22320	Salt	NON_TF
#A69363	AT2G34710	Salt	TF
#A69363	AT5G08330	Salt	TF
#A69363	AT3G11440	Salt	TF
#A69363	AT5G62220	Salt	NON_TF
#A69363	AT4G32800	Salt	TF
#A69363	AT4G01400	Salt	NON_TF
#A69363	AT2G33710	Salt	TF
#A69363	AT3G24570	Salt	NON_TF
#A69363	AT4G14410	Salt	TF
#A69363	AT1G32150	Salt	TF
#A69363	AT1G30520	Salt	NON_TF
